# Supplementary material
Source: PubMed Central journal article supplement (PMC4701576)

Supporting Information for:

## Mechanistic Studies of Copper(I)-Catalyzed 1,3-Halogen Migration

Ryan Van Hoveln,<sup>†</sup> Brandi M. Hudson,<sup>‡</sup> Henry B. Wedler,<sup>‡</sup> Desiree M. Bates,<sup>†</sup> Gabriel Le Gros,<sup>†</sup> Dean J. Tantillo<sup>‡\*</sup> and Jennifer M. Schomaker<sup>†\*</sup>

<sup>†</sup>*Department of Chemistry, University of Wisconsin-Madison, 1101 University Avenue  
Madison, Wisconsin, 53706-1396*

<sup>‡</sup>*Department of Chemistry, University of California-Davis, One Shields Avenue, Davis,  
California 95616*

|                                                                                   |      |
|-----------------------------------------------------------------------------------|------|
| <b>Table of Contents</b> .....                                                    | S1   |
| <b>I. General Information</b> .....                                               | S2   |
| <b>II. Preparation of substrates for the 1,3-halogen migration reaction</b> ..... | S4   |
| <b>III. Non-linear effects study</b> .....                                        | S11  |
| <b>IV. Kinetic studies of 1,3-halogen migration</b> .....                         | S13  |
| <b>V. Stoichiometric Characterization of Aryl Copper</b> .....                    | S18  |
| <b>VI. Factors impacting selectivity</b> .....                                    | S27  |
| <b>VII. Transfer of stereochemistry with deuterated dihydronaphthalene</b> .....  | S31  |
| <b>VIII. Computational details and optimized geometries</b> .....                 | S35  |
| <b>A. Impact of steric bulk on hydroboration of benzyl copper</b> .....           | S35  |
| <b>B. Cu(I)/Cu(III) pathways</b> .....                                            | S64  |
| <b>C. Pathways involving one-electron changes at copper</b> .....                 | S73  |
| <b>D. Dearomative pathway</b> .....                                               | S91  |
| <b>E. Transition state structures in enantiodetermining step</b> .....            | S167 |

|                                                                      |      |
|----------------------------------------------------------------------|------|
| <b>F. Starting materials, product, and other intermediates</b> ..... | S173 |
| <b>IX. References</b> .....                                          | S183 |
| <b>X. NMR Spectra</b> .....                                          | S186 |

## **I. General Information**

All glassware was either oven-dried overnight at 130 °C or flame-dried under a stream of dry nitrogen prior to use. Unless otherwise specified, reagents were used as obtained from the vendor without further purification. Tetrahydrofuran and diethyl ether were freshly distilled from purple Na/benzophenone ketyl. Dichloromethane, acetonitrile and toluene were dried over CaH<sub>2</sub> and freshly distilled prior to use. All other solvents were purified in accordance with “Purification of Laboratory Chemicals”.<sup>1</sup> Air- and moisture-sensitive reactions were performed either in a Braun LabStar glovebox under an atmosphere of nitrogen or using standard Schlenk techniques under an atmosphere of nitrogen. Analytical thin layer chromatography (TLC) was performed utilizing pre-coated silica gel 60 F<sub>254</sub> plates containing a fluorescent indicator, while preparative chromatography was performed using SilicaFlash P60 silica gel (230-400 mesh) via Still’s method.<sup>2</sup> Unless otherwise stated, the mobile phases for column chromatography were mixtures of hexanes/ethyl acetate. Columns were typically run using a gradient method, beginning with 100% hexanes and gradually increasing the polarity using ethyl acetate. Various stains were used to visualize reaction products, including *p*-anisaldehyde, KMnO<sub>4</sub>, ceric ammonium nitrate and phosphomolybdic acid in ethanol stain.

<sup>1</sup>H NMR and <sup>13</sup>C NMR spectra were obtained using Bruker-300, Varian Inova-500, Varian Unity-500 or Varian Inova-600 NMR spectrometers. For <sup>1</sup>H NMR, chemical

shifts are reported relative to residual protiated solvent peaks ( $\delta$  7.26, 2.49, 7.15 and 4.80 ppm for  $\text{CDCl}_3$ ,  $(\text{CD}_3)_2\text{SO}$ ,  $\text{C}_6\text{D}_6$  and  $\text{CD}_3\text{OD}$  respectively).  $^{13}\text{C}$  NMR spectra were measured at either 125 MHz or 150 MHz on the same instruments noted above for recording  $^1\text{H}$  NMR spectra. Chemical shifts were again reported in accordance to residual protiated solvent peaks ( $\delta$  77.0, 39.5, 128.0 and 49.0 ppm for  $\text{CDCl}_3$ ,  $(\text{CD}_3)_2\text{SO}$ ,  $\text{C}_6\text{D}_6$ , and  $\text{CD}_3\text{OD}$ , respectively). IR spectral data were obtained using a Bruker Vector 22 spectrometer using either a thin film or an ATR adapter. Melting points were obtained with a Mel-Temp II (Laboratory Devices, Inc.) melting point apparatus. High-pressure liquid chromatography (HPLC) analyses were performed at 224 and 254 nm using Shimadzu HPLC, Model LC-20AB. An AD-H column (4.6  $\mu\text{m}$  diameter x 258 mm) at a temperature of 40  $^\circ\text{C}$  was employed, using a flow rate of 1 mL/min and a gradient starting at 10% isopropanol in hexanes for 10 min and increasing to 30% isopropanol in hexanes. The eluant was then held at 30% isopropanol in hexanes until the run was completed. Accurate mass measurements were acquired at the University of Wisconsin, Madison using a Micromass LCT (electrospray ionization, time-of-flight analyzer or electron impact methods). The NMR and Mass Spectrometry facilities are funded by the NSF (CHE-9974839, CHE-9304546, CHE-9208463, CHE-9629688) and the University of Wisconsin, as well as the NIH (RR08389-01).

## II. Preparation of Substrates for 1,3-halogen Migration

Substrates 2-bromostyrene (Table 1, entries 1-4), 2-bromo-5-methoxystyrene (entries 9-11), and 2-bromo-5-fluorostyrene (entries 5-6) were prepared according to previously reported procedures.<sup>3</sup>

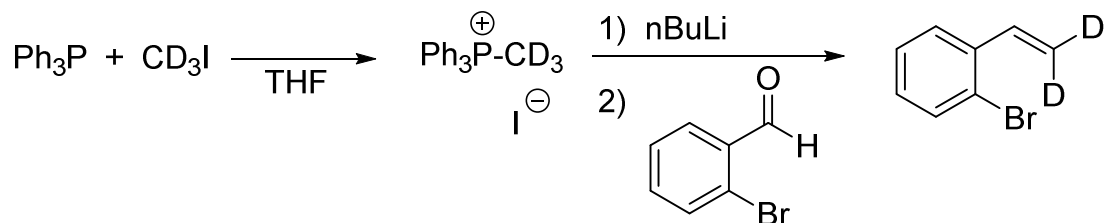

**2-Bromo-β,β-dideuterostyrene (eq 4 in manuscript).** A flame-dried 250 mL flask was charged with iodomethane-*d*<sub>3</sub> (0.93 mL, 14.9 mmol, 1.16 equiv), triphenylphosphine (3.96 g, 15.1 mmol, 1.18 equiv) and 70 mL of dry THF and equipped with a reflux condenser under an atmosphere of nitrogen. The reaction was refluxed for 6 h and then cooled in an ice bath. To the slurry was added nBuLi (6.0 mL of a 2.5 M solution in hexanes, 15 mmol, 1.17 equiv) in a dropwise fashion. The reaction was allowed to stir for 30 min and then 2-bromobenzaldehyde (1.5 mL, 12.8 mmol, 1.0 equiv) was added slowly. The reaction was allowed to stir at ambient temperature for 1 h and then quenched by adding silica gel. The mixture was concentrated *in vacuo* to a slurry. The slurry was poured onto the top of a pad of silica and then washed with ~500 mL of hexanes. The hexanes were removed *in vacuo* and the crude product was purified by column chromatography using hexanes as the eluant. The styrene was isolated as a clear, colorless oil in 18% yield. <sup>1</sup>H NMR (500 MHz, CDCl<sub>3</sub>) δ 7.55 (dd, *J* = 8.0, 1.4 Hz, 2H), 7.28 (td, *J* = 7.8, 0.8 Hz, 1H), 7.11 (td, *J* = 7.8, 1.7 Hz, 1H), 7.05 (broad s, 1H). <sup>13</sup>C NMR (126 MHz, CDCl<sub>3</sub>) δ 137.5, 135.6, 132.9, 129.1, 127.5, 126.8, 123.6, 116.1 (m). HRMS (EI) *m/z* calculated for C<sub>8</sub>H<sub>5</sub>D<sub>2</sub>Br [M]<sup>+</sup> 183.9852, found 183.9855.

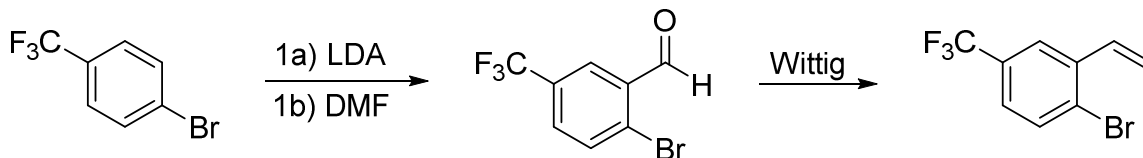

**2-Bromo-5-trifluoromethylstyrene (Table 1, entries 7-8).**<sup>4</sup> A 250 mL three-neck round bottom flask was flame-dried, equipped with an addition funnel was placed under an atmosphere of nitrogen and charged with 50 mL of THF. A portion of 10 mL of THF was placed in the addition funnel and the flask was placed in an acetone/CO<sub>2</sub> bath. Diisopropylamine (8.5 mL, 60.6 mmol, 1.21 equiv) was added to the flask and then nBuLi (26.0 mL of a 2.38 M solution in hexanes, 61.9 mmol, 1.24 equiv) was added dropwise. The reaction was allowed to stir at -78 °C for 20 min. then a solution of 4-trifluoromethylbromobenzene (7.0 mL, 50.0 mmol, 1.0 equiv) in THF was added dropwise over 10 min. Once the addition was complete, the reaction was allowed to stir for 30 min at -78 °C. A portion of dry DMF (11.0 mL, 142 mmol, 2.84 equiv) was added in one aliquot. After 5 min, the acetone/dry ice bath was removed and the reaction was allowed to warm to ambient temperature. After 1 h, 100 mL of 1 M HCl was added and the reaction was allowed to stir for 5 min. The mixture was extracted with CH<sub>2</sub>Cl<sub>2</sub> three times and the combined organic layers were dried with Na<sub>2</sub>SO<sub>4</sub> and concentrated *in vacuo*. The product was purified by column chromatography using hexanes/EtOAc as the eluant. A gradient was employed using 0-10% EtOAc in 2% increments. The aldehyde was isolated as a yellow oil in 74% yield.

A flame-dried 500 mL round bottom flask was charged with triphenylmethylphosphonium iodide (9.64 g, 23.8 mmol, 1.20 equiv) and 200 mL of THF under an atmosphere of nitrogen and placed in an ice bath. To the slurry was added nBuLi (9.5 mL of a 2.38 M solution in hexanes, 22.6 mmol, 1.14 equiv) dropwise. The

reaction was allowed to stir for 30 min and then 2-bromo-5-trifluoromethylbenzaldehyde (3.0 mL, 19.9 mmol, 1.0 equiv) was added slowly. The reaction was allowed to stir at ambient temperature for 1 h and then quenched by adding silica gel. The mixture was concentrated *in vacuo* to a slurry. The slurry was poured onto the top of a pad of silica and washed with ~500 mL of hexanes. The hexanes were removed *in vacuo* and the crude product was purified by column chromatography using hexanes as the eluant. The styrene was isolated as a clear, colorless oil in 46% yield.  $^1\text{H}$  NMR (500 MHz,  $\text{CDCl}_3$ )  $\delta$  7.77 (d,  $J = 2.5$  Hz, 1H), 7.68 (d,  $J = 8.3$  Hz, 1H), 7.36 (dd,  $J = 8.4, 2.3$  Hz, 1H), 7.06 (dd,  $J = 17.4, 11.0$  Hz, 1H), 5.78 (d,  $J = 17.4$  Hz, 1H), 5.48 (d,  $J = 11.0$  Hz, 1H).  $^{13}\text{C}$  NMR (126 MHz,  $\text{CDCl}_3$ )  $\delta$  138.3, 134.8, 133.5, 130.1 (q,  $J = 32.8$  Hz), 127.1 (q,  $J = 1.7$  Hz), 125.4 (q,  $J = 3.7$  Hz), 123.8 (q,  $J = 272.4$  Hz), 123.6 (q,  $J = 3.9$  Hz). HRMS (EI)  $m/z$  calculated for  $\text{C}_9\text{H}_6\text{BrF}_3$   $[\text{M}]^+$  249.9600, found 249.9606.

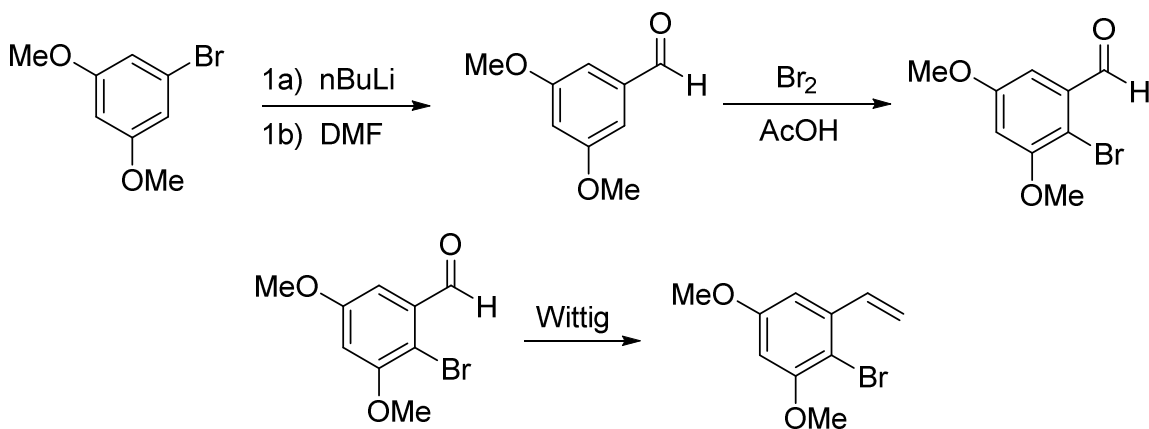

**2-Bromo-3,5-dimethoxystyrene (Table 1, entries 12-14).** A flame-dried 250 mL flask was charged with 3,5-dimethoxybromobenzene (5.00 g, 23.0 mmol, 1.0 equiv) and 150 mL of dry THF under an atmosphere of nitrogen. The flask was transferred to an acetone/dry ice bath and allowed to stir for 10 min. An aliquot of nBuLi (13.5 mL of a

2.08 M solution in hexanes, 28.1 mmol, 1.22 equiv) was added slowly. The reaction was allowed to stir for 20 min and then DMF (5.5 mL, 71.0 mmol, 3.09 equiv) was added in one aliquot. The reaction was allowed to stir for 20 min and then allowed to warm to ambient temperature. A portion of 100 mL 1 M HCl was added and the mixture was allowed to stir for 5 min. The aqueous mixture was extracted three times with CH<sub>2</sub>Cl<sub>2</sub> and the combined organic layers were dried with Na<sub>2</sub>SO<sub>4</sub> and concentrated *in vacuo*. The crude material was purified by column chromatography using hexanes/EtOAc as the eluant. A gradient was employed using 0-30% EtOAc in 6% increments. The 3,5-dimethoxybenzaldehyde was isolated as a pale yellow solid in 78% yield.

A 100 mL round bottom flask was charged with 20 mL acetic acid, 3,5-dimethoxybenzaldehyde (3.00 g, 18.1 mmol, 1.0 equiv), and bromine (0.83 mL, 16.2 mmol, 0.90 equiv). The reaction was allowed to stir for 10 min and then poured into water/CH<sub>2</sub>Cl<sub>2</sub>. The organic layer was washed three times with water, once with saturated NaHSO<sub>3</sub> and once with 1 M KOH. The organic layer was dried with Na<sub>2</sub>SO<sub>4</sub> and concentrated *in vacuo*. The solid crude product was placed in a Büchner funnel and washed with a small amount of cold methanol to remove the remaining starting material. The yellow solid was isolated in 71% yield and used without further purification.

The aldehyde was used in the subsequent Wittig olefination to prepare 2-bromo-3,5-dimethoxystyrene in a fashion similar to that described for the synthesis of 2-bromo- $\beta,\beta$ -dideuterostyrene. The 2-bromo-3,5-dimethoxystyrene was purified by column chromatography using hexanes/CH<sub>2</sub>Cl<sub>2</sub> as the eluant. A gradient was employed using 0-30% CH<sub>2</sub>Cl<sub>2</sub> in 6% increments. The 2-bromo-3,5-dimethoxystyrene was isolated as a thick, clear oil in 29% yield. <sup>1</sup>H NMR (500 MHz, CDCl<sub>3</sub>)  $\delta$  7.11 (dd, *J* = 17.3, 10.9 Hz,

1H), 6.70 (d,  $J = 2.7$  Hz, 1H), 6.43 (d,  $J = 2.8$  Hz, 1H), 5.68 (dd,  $J = 17.4, 1.1$  Hz, 1H), 5.37 (dd,  $J = 10.8, 1.1$  Hz, 1H), 3.87 (s, 3H), 3.83 (s, 3H).  $^{13}\text{C}$  NMR (126 MHz,  $\text{CDCl}_3$ )  $\delta$  159.6, 156.7, 139.1, 136.3, 116.9, 104.5, 102.8, 99.2, 56.4, 55.5. HRMS (EI)  $m/z$  calculated for  $\text{C}_{10}\text{H}_{11}\text{BrO}_2$   $[\text{M}]^+$  241.9937, found 241.9934.

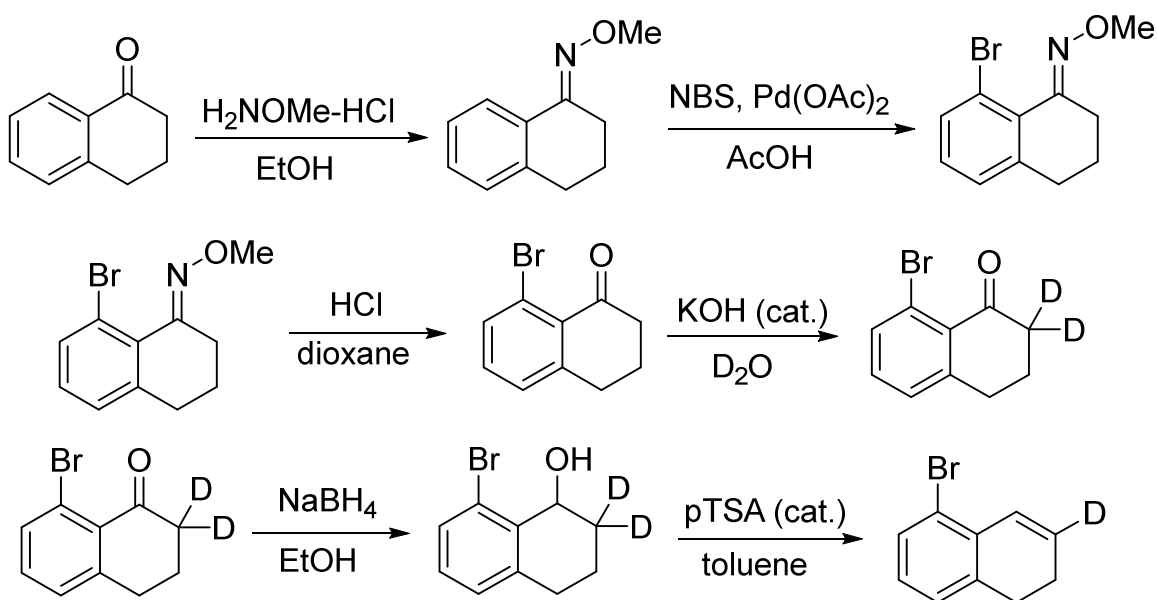

**5-Bromo(3-D)-1,2-dihydronaphthalene 6.1.**<sup>5</sup> A 250 mL round bottom flask was charged with tetralone (6.5 mL, 48.9 mmol, 1.0 equiv) and methoxyamine hydrochloride (6.55 g, 78.4 mmol, 1.60 equiv) in 100 mL ethanol. The reaction was refluxed for 1.5 h, allowed to cool to ambient temperature and poured into water/ $\text{CH}_2\text{Cl}_2$ . The water layer was extracted 2x with  $\text{CH}_2\text{Cl}_2$ . The combined organic layers were dried with  $\text{Na}_2\text{SO}_4$  and concentrated *in vacuo*. The crude product was used without further purification.

A 500 mL round bottom flask was charged with tetralone O-methoxime (used directly from previous reaction), palladium acetate (0.559 g, 2.49 mmol, 5 mol%) and NBS (8.97 g, 50.4 mmol, ~1 equiv) in 350 mL of acetic acid. The reaction was refluxed under an atmosphere of nitrogen for 1.5 h. The reaction was allowed to cool to ambient



temperature and then poured into water and CH<sub>2</sub>Cl<sub>2</sub>. The organic layer was washed with water and then a portion of 1 M KOH. The organic layer was dried with Na<sub>2</sub>SO<sub>4</sub> and concentrated *in vacuo*. The crude product was used without further purification.

A 500 mL round bottom flask was charged with the crude bromotetralone O-methyloxime, 200 mL of 6 M HCl and 120 mL of dioxane. The reaction was refluxed for 2.5 h, allowed to cool to ambient temperature and poured into CH<sub>2</sub>Cl<sub>2</sub>/water. The layers were separated, the aqueous layer extracted twice with CH<sub>2</sub>Cl<sub>2</sub>, the combined organic layers dried with Na<sub>2</sub>SO<sub>4</sub> and then concentrated *in vacuo*. The crude material was used without further purification.

A 250 mL round bottom flask was charged with 100 mL D<sub>2</sub>O, bromotetralone (used directly from previous reaction), KOH (0.298 g, 5.31 mmol, 10 mol%), and 18-crown-6 (0.622 g, 2.35 mmol, 5 mol%). The reaction was refluxed for 1 h, allowed to cool to ambient temperature and poured into CH<sub>2</sub>Cl<sub>2</sub>. The aqueous layer was extracted twice with CH<sub>2</sub>Cl<sub>2</sub> and the combined organic layers were dried with Na<sub>2</sub>SO<sub>4</sub> and concentrated *in vacuo*. The crude material was used without further purification.

A 250 mL round bottom flask was charged with deuterated bromotetralone (used directly from previous reaction) and NaBH<sub>4</sub> (3.681 g, 97.3 mmol, ~2 equiv) in 100 mL of EtOH. The reaction was allowed to stir at 0 °C for 30 min. Saturated NH<sub>4</sub>Cl was added until the effervescence ceased. The reaction was then poured into water and CH<sub>2</sub>Cl<sub>2</sub> and the aqueous layer was extracted twice with CH<sub>2</sub>Cl<sub>2</sub>. The combined organic layers were dried with Na<sub>2</sub>SO<sub>4</sub> and concentrated *in vacuo*. The crude material was used without further purification. A 100 mL round bottom flask was charged with the deuterated bromotetralol (used directly from the previous reaction) and *para*-toluenesulfonic acid

(0.977 g, 5.14 mmol, ~10 mol%) in 50 mL of toluene. The flask was equipped with a Dean-Stark trap and a reflux condenser and the reaction refluxed for 30 min. The reaction was cooled to ambient temperature and poured into saturated NaHCO<sub>3</sub>, the aqueous layer extracted with EtOAc, the combined organic layers dried with Na<sub>2</sub>SO<sub>4</sub> and concentrated *in vacuo*. The product was purified by column chromatography using hexanes as the eluant. The deuterated bromodihydronaphthalene was isolated as a clear, colorless oil in 47% yield over the six steps. <sup>1</sup>H NMR (500 MHz, CDCl<sub>3</sub>) δ 7.37 (d, *J* = 7.8 Hz, 1H), 7.03 (d, *J* = 7.5 Hz, 1H), 6.95 (t, *J* = 7.7 Hz, 1H), 6.83 (broad s, 1H), 2.78 (t, *J* = 8.2 Hz, 2H), 2.29 (t, *J* = 8.3 Hz, 2H). <sup>13</sup>C NMR (126 MHz, CDCl<sub>3</sub>) δ 138.0, 133.0, 130.7, 130.6 (1,1,1-triplet, *J* = 24.6 Hz), 127.8, 126.7, 126.2, 121.9, 28.2, 22.7. HRMS (EI) *m/z* calculated for C<sub>10</sub>H<sub>8</sub>DBr [M]<sup>+</sup> 208.9945, found 208.9946.

### III. Non-linear effects study.

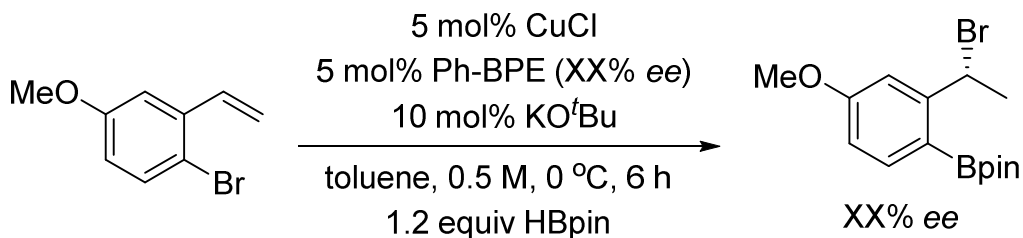

In a glovebox, a scintillation vial was charged with a solution of (*S,S*)-Ph-BPE (56 mg) in 4.0 mL of toluene (0.027 M). Another scintillation vial was charged with a solution of (*R,R*)-Ph-BPE (18 mg) in 1.3 mL of toluene (0.027 M). A mixture of CuCl (15 mg) and KO<sup>t</sup>Bu (34 mg) was thoroughly ground together to form a homogenous, fine powder. A 1.5 mL vial was charged with 1.6 mg of the CuCl/KO<sup>t</sup>Bu mixture (5 mol% CuCl, 10 mol% KO<sup>t</sup>Bu) and the ligand solutions (5 mol% total ligand loading) so that the total volume was 250  $\mu$ L; for exact amounts, see Table 1). The vial was equipped with a screw cap that had a septum and the reaction was removed from the glovebox. The reaction was allowed to stir for 10 min and then HBpin (22  $\mu$ L, 0.15 mmol, 1.2 equiv) was added in one aliquot. The reaction was transferred to an ice bath and 2-bromo-5-methoxystyrene (19  $\mu$ L, 0.125 mmol, 1.0 equiv) was added. The reaction was allowed to stir at 0 °C for 6 h and then passed through a plug of silica gel using diethyl ether as the eluant. The volatiles were removed *in vacuo* and the crude material was used for chiral HPLC analysis without further purification (in general, rigorous purification of enantioenriched benzyl bromides resulted in the degradation of *ee*). Chromatograms were acquired on a Shimadzu Prominence HPLC equipped with a Chiracel AD-H column. Flow rate: 1.00 mL/min.; Oven temp: 40.0 °C; Solvent: isocratic 1.00% *i*PrOH

in hexanes; Detector: UV @ 254 nm and 225 nm.  $t_R = 4.15$  min,  $t_S = 5.03$  min,  $t_{SM} = 4.56$  min.

**Table 1: Tabulation of non-linear effects**

| entry | S soln. ( $\mu\text{L}$ ) | R soln. ( $\mu\text{L}$ ) | ligand <i>ee</i> | product <i>ee</i> |
|-------|---------------------------|---------------------------|------------------|-------------------|
| 1     | 250                       | 0                         | 100              | 90                |
| 2     | 244                       | 6.0                       | 95               | 80                |
| 3     | 238                       | 12                        | 90               | 83                |
| 4     | 231                       | 19                        | 85               | 78                |
| 5     | 225                       | 26                        | 80               | 75                |
| 6     | 219                       | 31                        | 75               | 70                |
| 7     | 213                       | 37                        | 70               | 65                |
| 8     | 206                       | 44                        | 65               | 51                |
| 9     | 200                       | 50                        | 60               | 58                |
| 10    | 194                       | 56                        | 55               | 52                |
| 11    | 188                       | 62                        | 50               | 50                |
| 12    | 181                       | 69                        | 45               | 43                |
| 13    | 175                       | 75                        | 40               | 39                |
| 14    | 169                       | 81                        | 35               | 29                |
| 15    | 163                       | 87                        | 30               | 34                |
| 16    | 156                       | 94                        | 25               | 30                |
| 17    | 150                       | 100                       | 20               | 22                |
| 18    | 144                       | 106                       | 15               | 17                |
| 19    | 138                       | 112                       | 10               | 7                 |

**Figure 1: Graph of non-linear effects with trend lines**

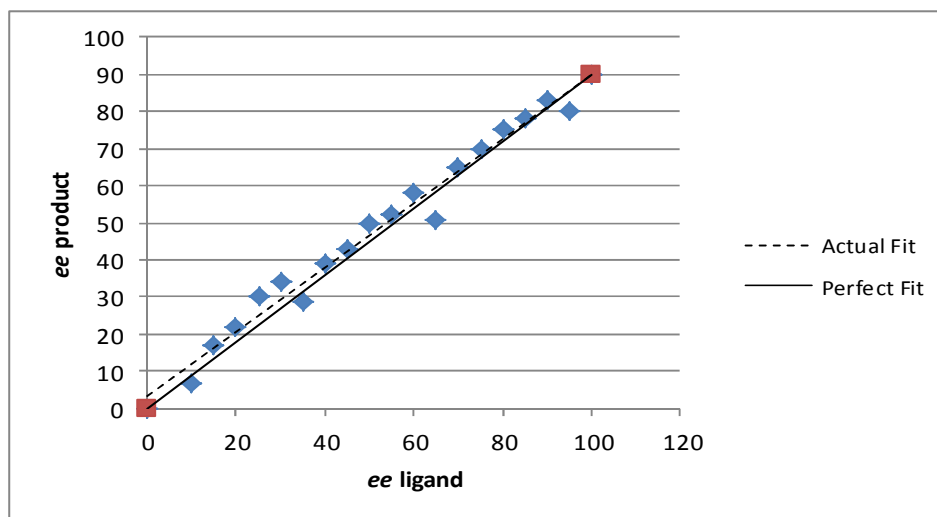

Perfect Linear Fit Equation:  $y = 0.9x$

Actual Linear Fit Equation:  $y = 0.868x + 3.305$ ;  $R^2 = 0.9801$

#### IV. Kinetic studies of 1,3-halogen migration.

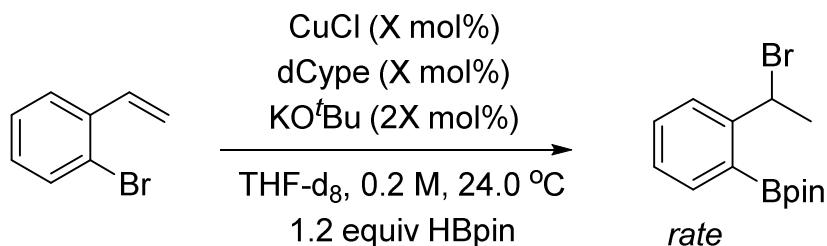

In a glovebox, CuCl, KO<sup>t</sup>Bu, dCype and dry, degassed THF-d<sub>8</sub> (see Table 2 for exact amounts at different catalyst loadings) were added to a dry NMR tube. A rubber septum was placed on the tube and the tube was removed from the glovebox. Mesitylene (10 μL) was added to the NMR tube as an internal standard and the tube was sonicated for 10 min. Pinacol borane (HBpin, see Table 2) was added in one aliquot and the NMR tube was inverted once. The 2-bromostyrene (see Table 2) was immediately added and the tube was inverted once, a stopwatch was started, and the tube was placed in the spectrometer. The sample was locked and shimmed and then a pulse program was used that acquired a one-scan spectrum every 30 sec. The time from the injection of the 2-bromostyrene to the first scan was typically 1-4 min. The sample was spun at frequency of 20 Hz and the probe temperature was held steady at 24.0 °C. Typically, a sample from a previous run was used to set receiver gain, lock and shim so that minimal shim time on the new sample was required. For all runs, the circled protons were integrated.

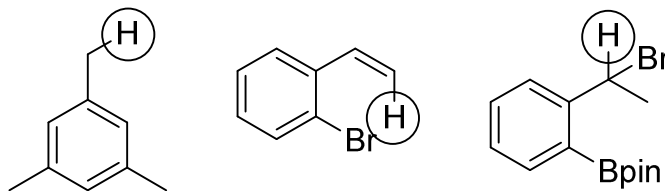

The reaction showed first-order rate dependence on catalyst concentration displaying saturation between 5 mol% and 10 mol% catalyst loading (Fig. 2, 3; Table 3). This rate

dependence is likely due to catalyst solubility, as not all of the pre-catalyst went into solution (visually).

**Table 2: Amounts of reagents for different catalyst loadings**

| cat. loading | CuCl (mg)                                                                                                                       | KOtBu (mg) | dCype (mg) | THF-d <sub>8</sub> (mL) | substrate (μL) | HBpin (μL) |
|--------------|---------------------------------------------------------------------------------------------------------------------------------|------------|------------|-------------------------|----------------|------------|
| 1%           | 2.0 mL of a stock solution of CuCl (1.3 mg), KO <sup>t</sup> Bu (2.9 mg) and dCype (5.5 mg) in 6.5 THF-d <sub>8</sub> was used. |            |            |                         | 50             | 70         |
| 2.5%         | 1.2                                                                                                                             | 2.8        | 5.5        | 2.50                    | 63             | 87         |
| 5%           | 1.2                                                                                                                             | 2.8        | 5.5        | 1.25                    | 31             | 44         |
| 10%          | 2.5                                                                                                                             | 5.6        | 11         | 1.25                    | 31             | 44         |
| 20%          | 5                                                                                                                               | 11         | 21         | 1.25                    | 31             | 44         |

**Figure 2: Time courses with different catalyst loadings**

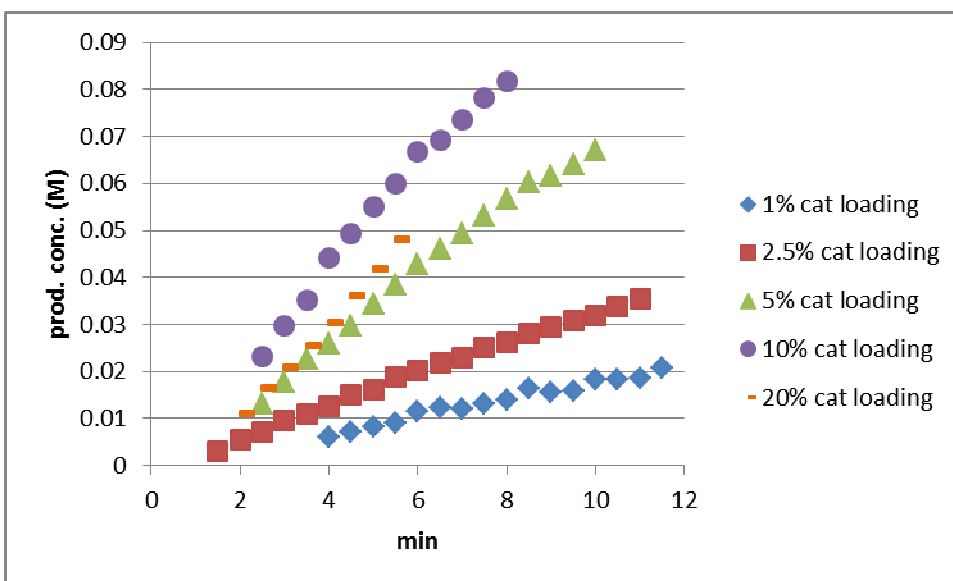

**Table 3: Summary of kinetics studies with different catalyst loadings**

| catalyst loading | initial rates | average  | standard deviation |
|------------------|---------------|----------|--------------------|
| 1%               | 0.001518      | 0.001604 | 8.38547E-05        |
| 1%               | 0.00161       |          |                    |
| 1%               | 0.001685      |          |                    |
| 2.50%            | 0.003248      | 0.003633 | 0.000405858        |
| 2.50%            | 0.003342      |          |                    |

|       |          |          |             |
|-------|----------|----------|-------------|
| 2.50% | 0.003838 |          |             |
| 2.50% | 0.004102 |          |             |
| 5%    | 0.006305 | 0.007388 | 0.000483438 |
| 5%    | 0.006985 |          |             |
| 5%    | 0.007241 |          |             |
| 5%    | 0.009021 |          |             |
| 10%   | 0.008738 | 0.009506 | 0.00107051  |
| 10%   | 0.00905  |          |             |
| 10%   | 0.010729 |          |             |
| 20%   | 0.008699 | 0.009539 | 0.000737983 |
| 20%   | 0.00921  |          |             |
| 20%   | 0.009863 |          |             |
| 20%   | 0.010385 |          |             |

**Figure 3: Rate vs. catalyst loading**

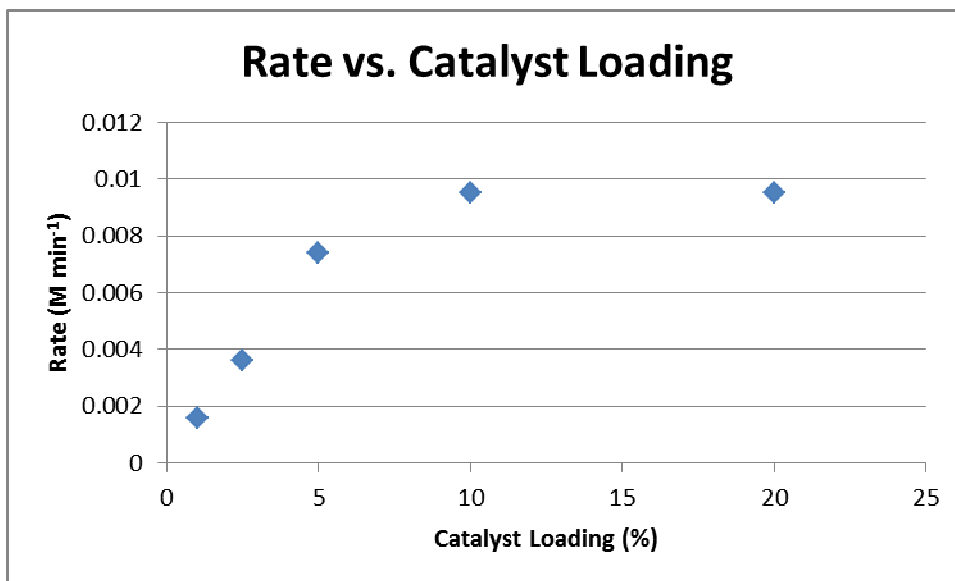

Over the course of the entire reaction, the rate of the reaction did not change as both the concentration of the 2-bromostyrene and HBpin changed (Figure 4). From this observation, it was determined that the reaction rate is not dependent on either 2-bromostyrene or HBpin. However, most time courses showed dramatic changes in rate over time as catalyst death occurred,<sup>6</sup> eventually halting the reaction altogether.

Deuterating the substrate at the terminal position of the styrene resulted in a small normal KIE of  $1.19 \pm 0.1$  (Figure 5, Table 4).

**Figure 4: Time course over entire reaction**

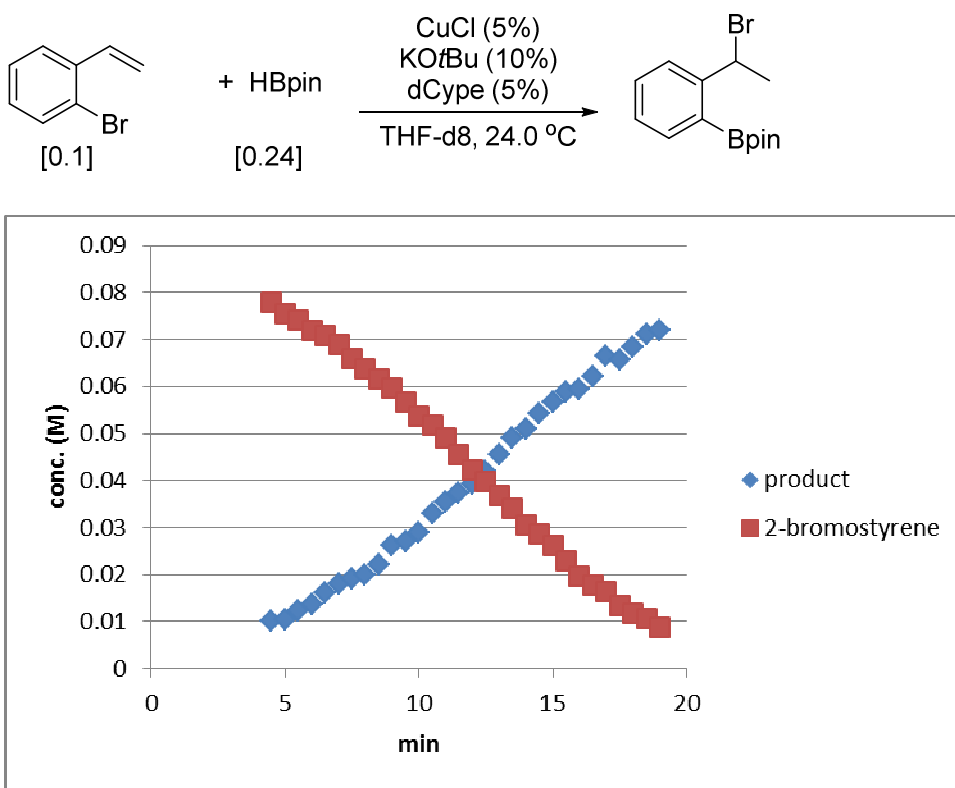

To determine if there was a change in rate if the terminal position of the styrene was deuterated, the reaction was run using 2-bromo- $\beta,\beta$ -dideuterostyrene. The same procedure was used as described above except 13  $\mu\text{L}$  of 2-bromo- $\beta,\beta$ -dideuterostyrene (0.099 mmol, 1.0 equiv), 17  $\mu\text{L}$  HBpin (0.117 mmol, 1.18 equiv), and 0.5 mL of a stock solution of 1.5 mg CuCl, 3.4 mg KO<sup>t</sup>Bu, and 6.3 mg dCype in 3.0 mL of THF-d<sub>8</sub> was used (2.5 mol% catalyst loading). <sup>1</sup>H NMR (500 MHz, CDCl<sub>3</sub>)  $\delta$  7.77 (dd,  $J = 7.4, 1.5$  Hz, 1H), 7.68 (dd,  $J = 7.9, 1.1$  Hz, 1H), 7.46 (td,  $J = 7.7, 1.5$  Hz, 1H), 7.26 (td,  $J = 7.3, 1.1$  Hz, 1H), 6.24 (d,  $J = 6.8$  Hz, 1H), 1.99 (broad-d,  $J = 7.0$  Hz, 1H), 1.37 (s, 6H), 1.36



(s, 6H).  $^{13}\text{C}$  NMR (126 MHz,  $\text{CDCl}_3$ )  $\delta$  149.4, 135.9, 131.5, 127.2, 126.4, 83.9, 48.5, 26.5 (1:2:3:2:1-pentet,  $J = 19.9$  Hz), 25.0, 24.7. HRMS (ESI)  $m/z$  calculated for  $\text{C}_{14}\text{H}_{22}\text{D}_2\text{BBrNO}_2$   $[\text{M}+\text{NH}_4]^+$  330.1206, found 330.1215.

**Figure 5: Time courses of unlabeled vs. deuterated substrate**

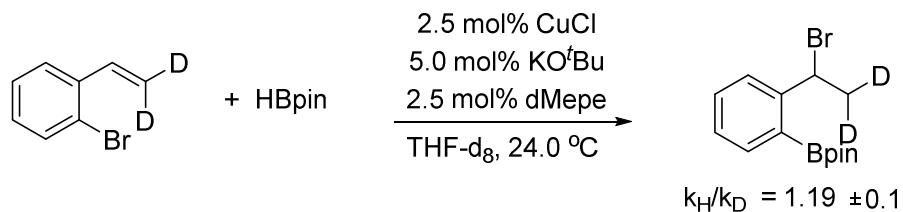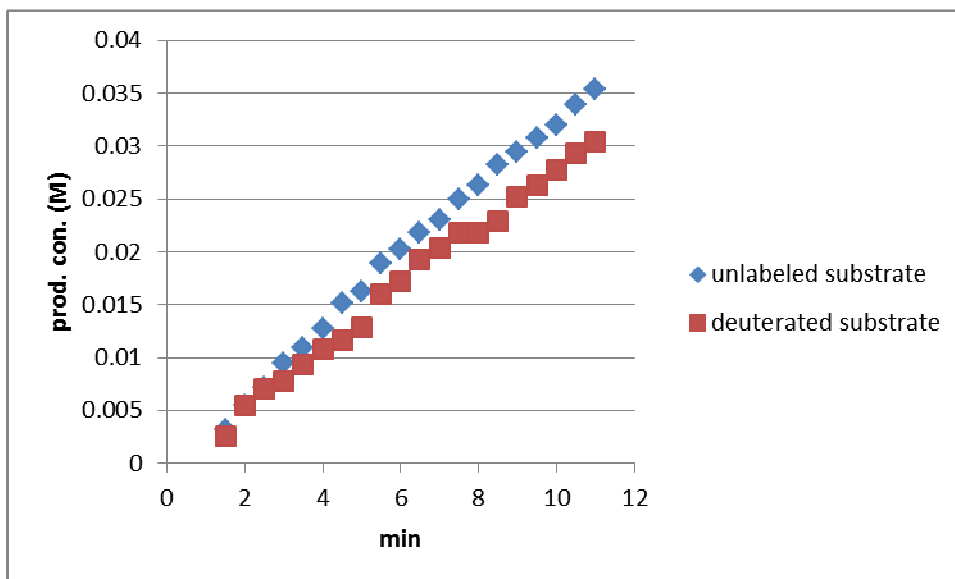

**Table 4: Summary of KIE studies**

| substrate  | initial rate | average  | standard deviation | $k_{\text{H}}/k_{\text{D}}$ | error    |
|------------|--------------|----------|--------------------|-----------------------------|----------|
| deuterated | 0.003202     | 0.00304  | 0.000175           | 1.194901                    | 0.105191 |
| deuterated | 0.003063     |          |                    |                             |          |
| deuterated | 0.002855     |          |                    |                             |          |
| unlabeled  | 0.003248     | 0.003633 | 0.000406           |                             |          |
| unlabeled  | 0.003342     |          |                    |                             |          |
| unlabeled  | 0.003838     |          |                    |                             |          |
| unlabeled  | 0.004102     |          |                    |                             |          |

## V. Stoichiometric Characterization of Aryl Copper

In a glovebox, a dry NMR tube was charged with  $\text{Cu}(\text{OAc})_2$  (4.5 mg, 24.8  $\mu\text{mol}$ , 1.0 equiv), dCype (11 mg, 26.0  $\mu\text{mol}$ , 1.05 equiv) and 0.5 mL of *p*-xylene- $\text{d}_{10}$ . The NMR tube was equipped with a septum and removed from the glovebox where the septum was wrapped with parafilm. The NMR tube was shaken, then PHMS (3.0  $\mu\text{L}$ , 50.2  $\mu\text{mol}$ , 2.03 equiv) and then shaken again. Just before placing in the spectrometer, 2-bromostyrene (3.1  $\mu\text{L}$ , 24.7  $\mu\text{mol}$ , 1.0 equiv) was injected and then the NMR tube was warmed in 40-45  $^\circ\text{C}$  water for 1.5-2 minutes. The NMR tube was then placed in an NMR spectrometer where the probe had been pre-cooled to 10  $^\circ\text{C}$ . At this temperature, the aryl copper species was stable for 1.5-2 hours before significant degradation occurred.

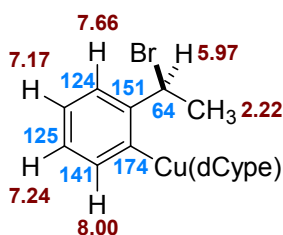

| Spectra                                                                                                        | Page |
|----------------------------------------------------------------------------------------------------------------|------|
| <sup>1</sup> H-NMR                                                                                             | S19  |
| 1D-TOCSY selecting proton at 5.97 ppm (stacked with <sup>1</sup> H)                                            | S20  |
| 1D-TOCSY selecting proton at 8.00 ppm (stacked with <sup>1</sup> H, various mix times ranging from 15ms-120ms) | S21  |
| 1D-NOESY selecting proton at 5.97 ppm (stacked with <sup>1</sup> H)                                            | S22  |
| HMBC with <sup>1</sup> H trace                                                                                 | S23  |
| HMBC with 1D-TOCSY trace                                                                                       | S24  |
| HSQC with <sup>1</sup> H trace                                                                                 | S25  |
| HSQC with 1D-TOCSY trace                                                                                       | S26  |

All spectra were acquired on a 750 MHz NMR.

# $^1\text{H-NMR}$ of aryl copper

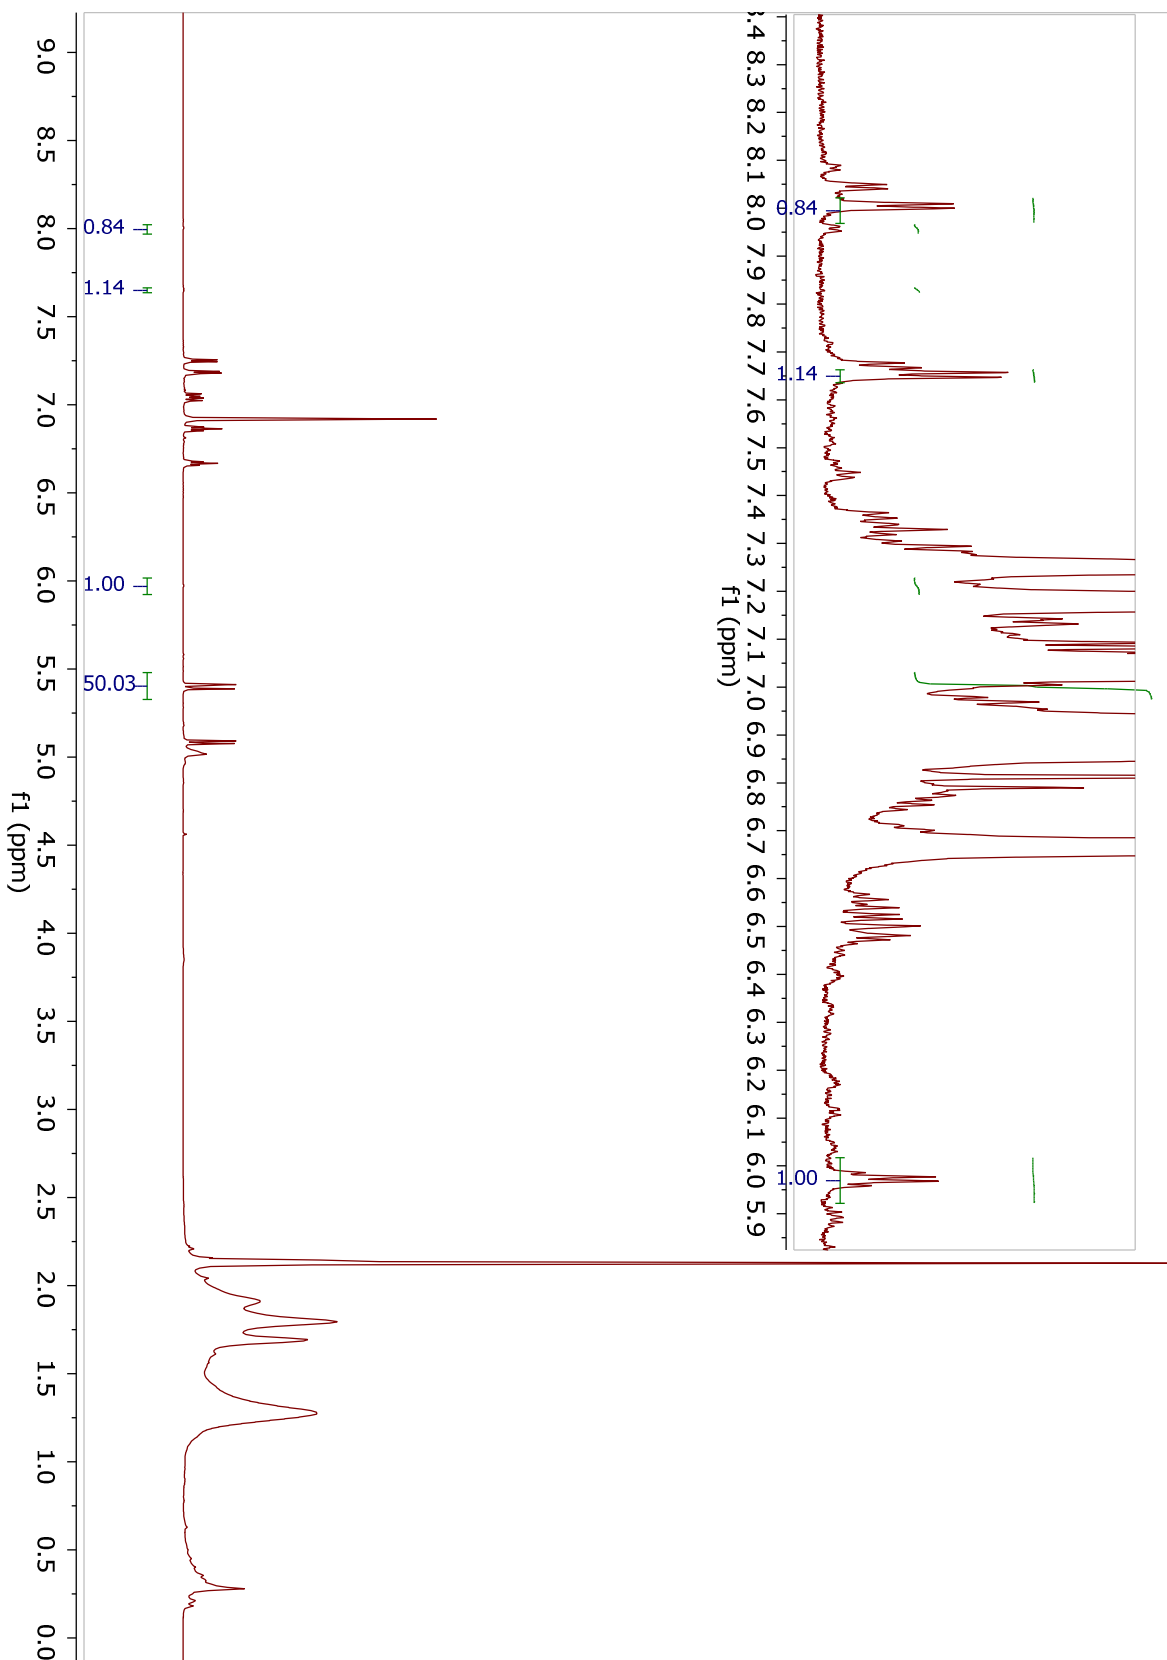

1D-TOCSY selecting proton at 5.97 ppm (stacked with <sup>1</sup>H-NMR)

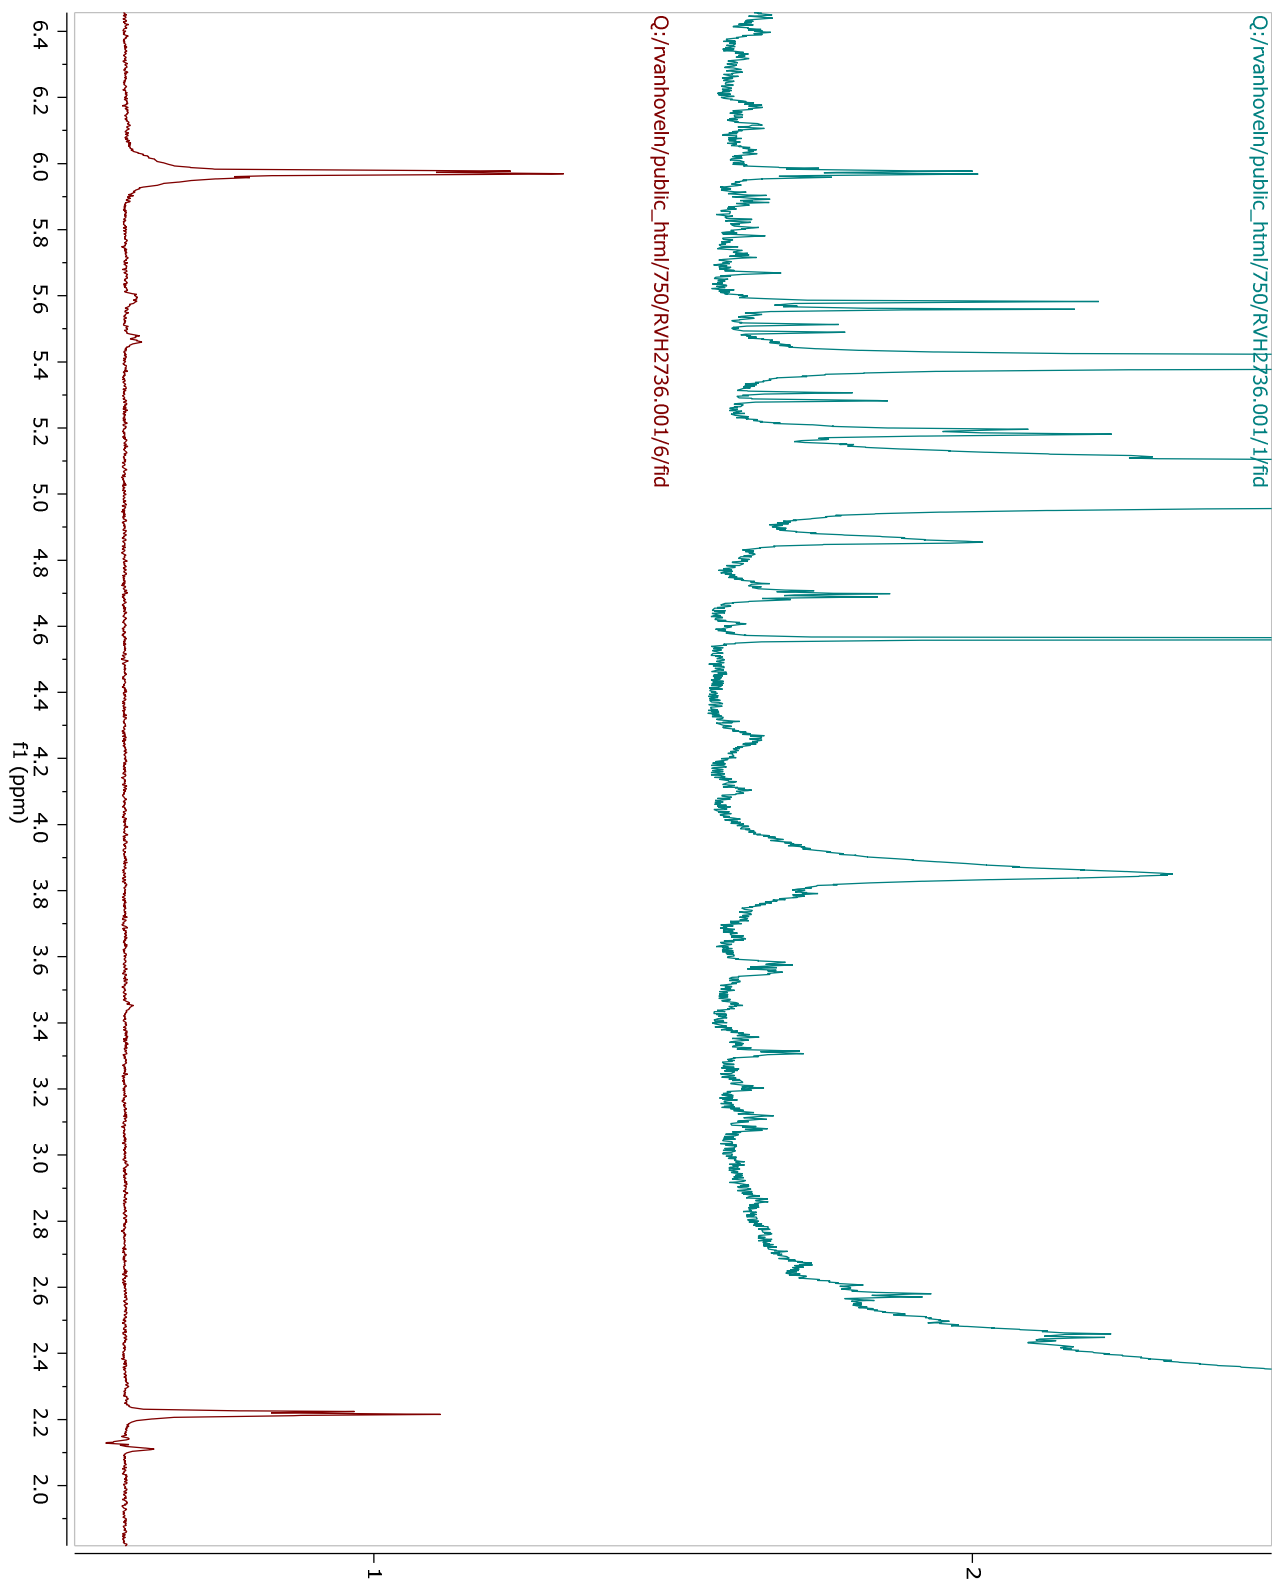

# 1D-TOCSY selecting proton at 8.00 ppm (stacked with $^1\text{H}$ , various mix times)

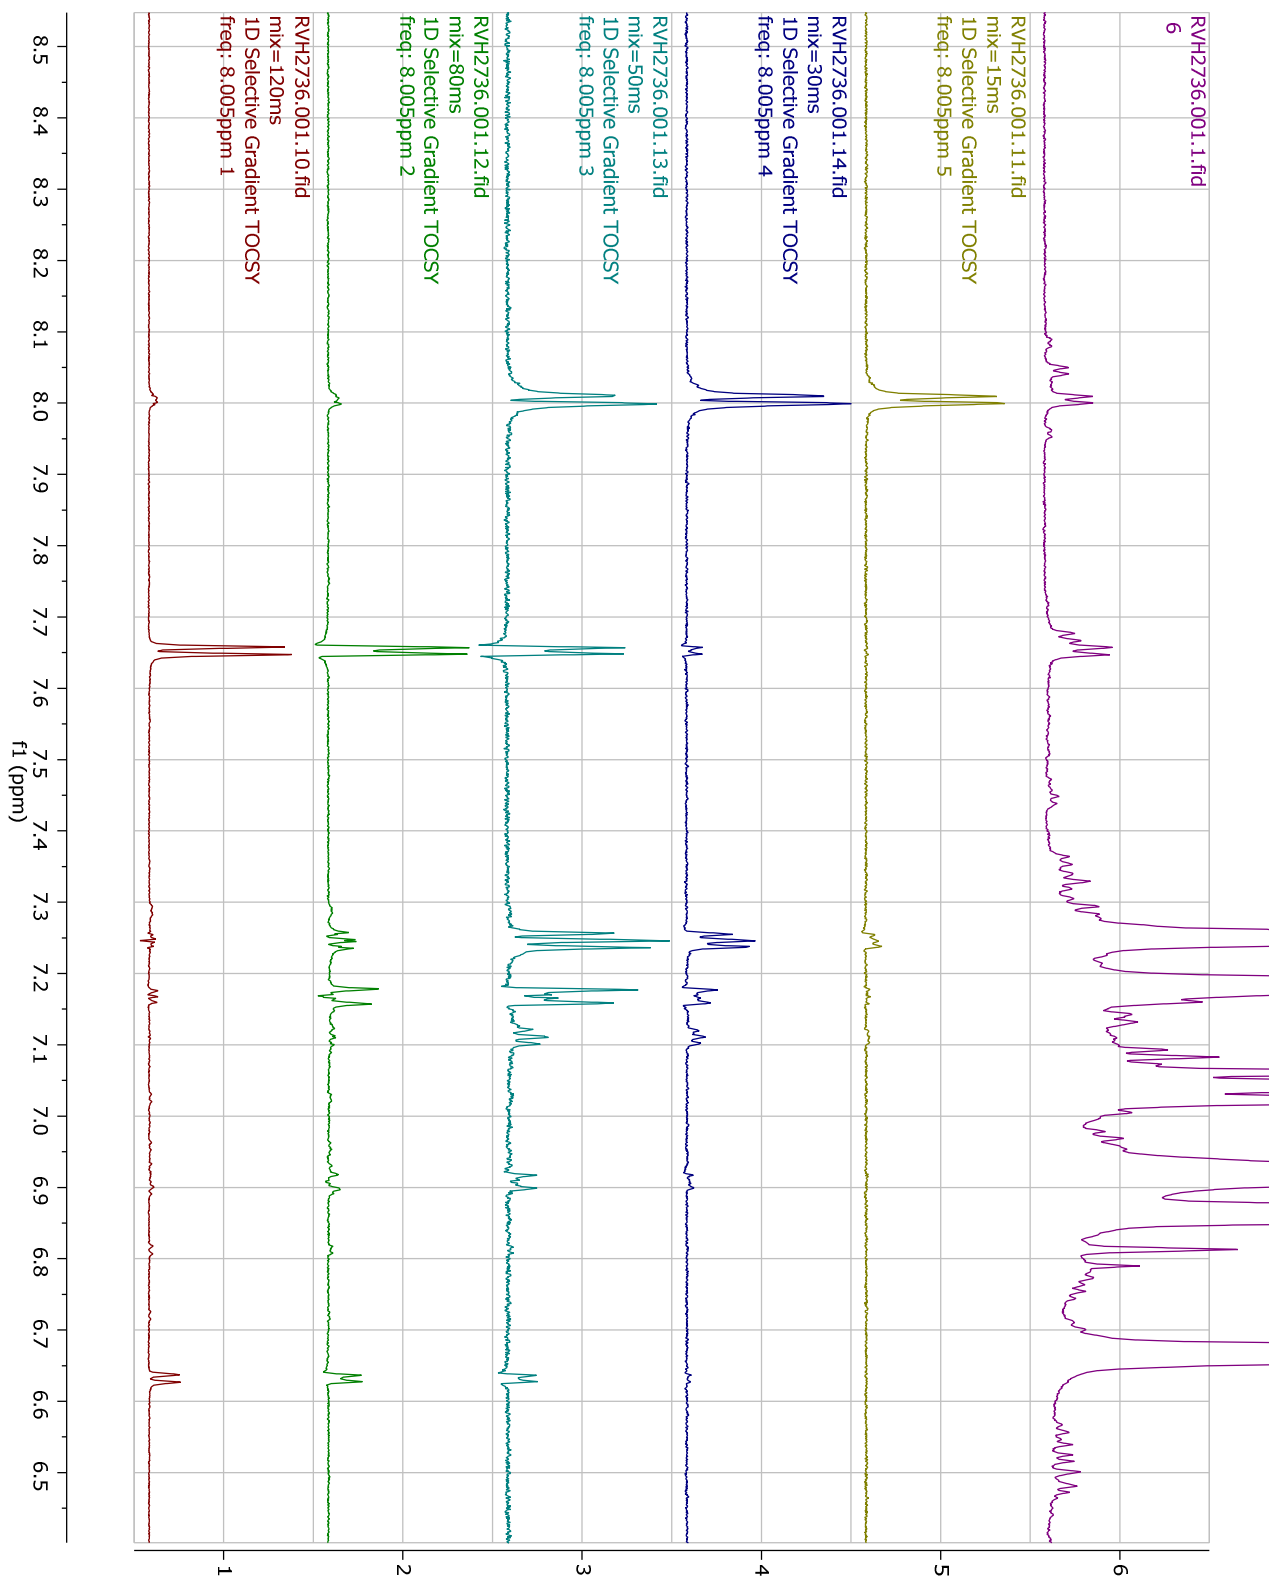

# 1D-NOESY selecting proton at 5.97 ppm (stacked with $^1\text{H}$ )

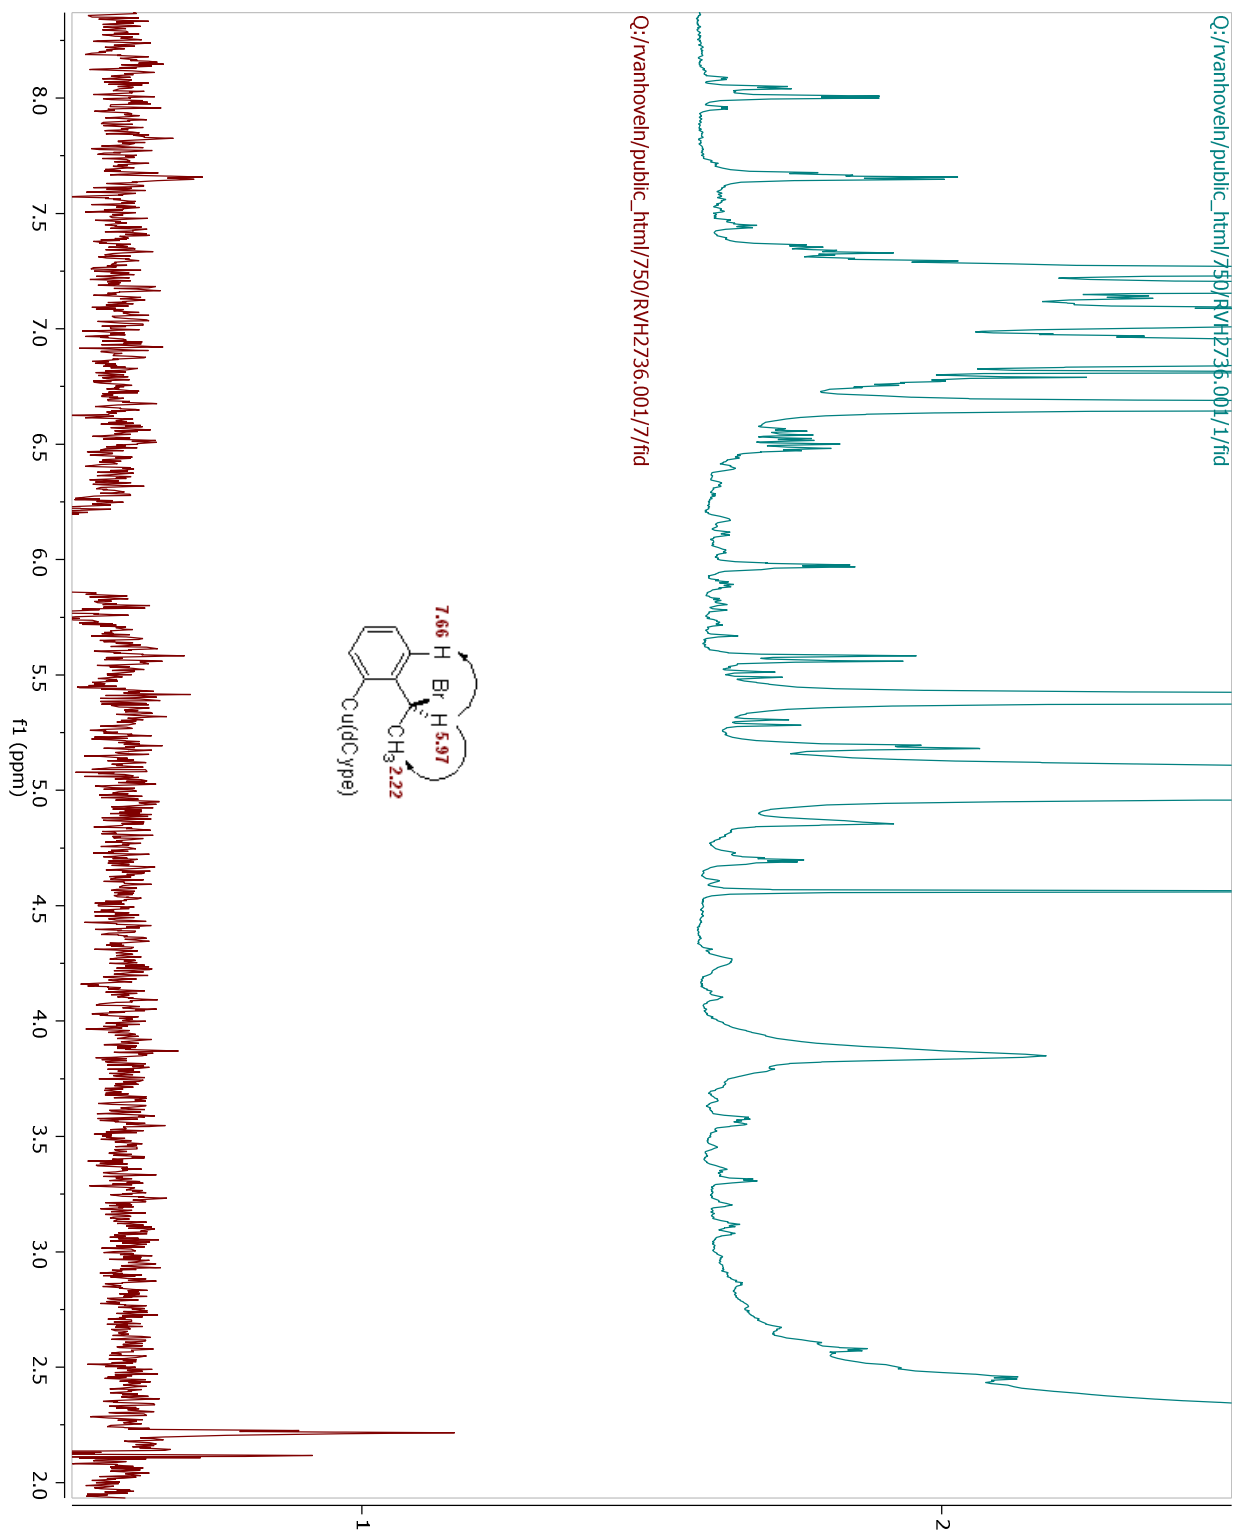

# HMBC with <sup>1</sup>H trace

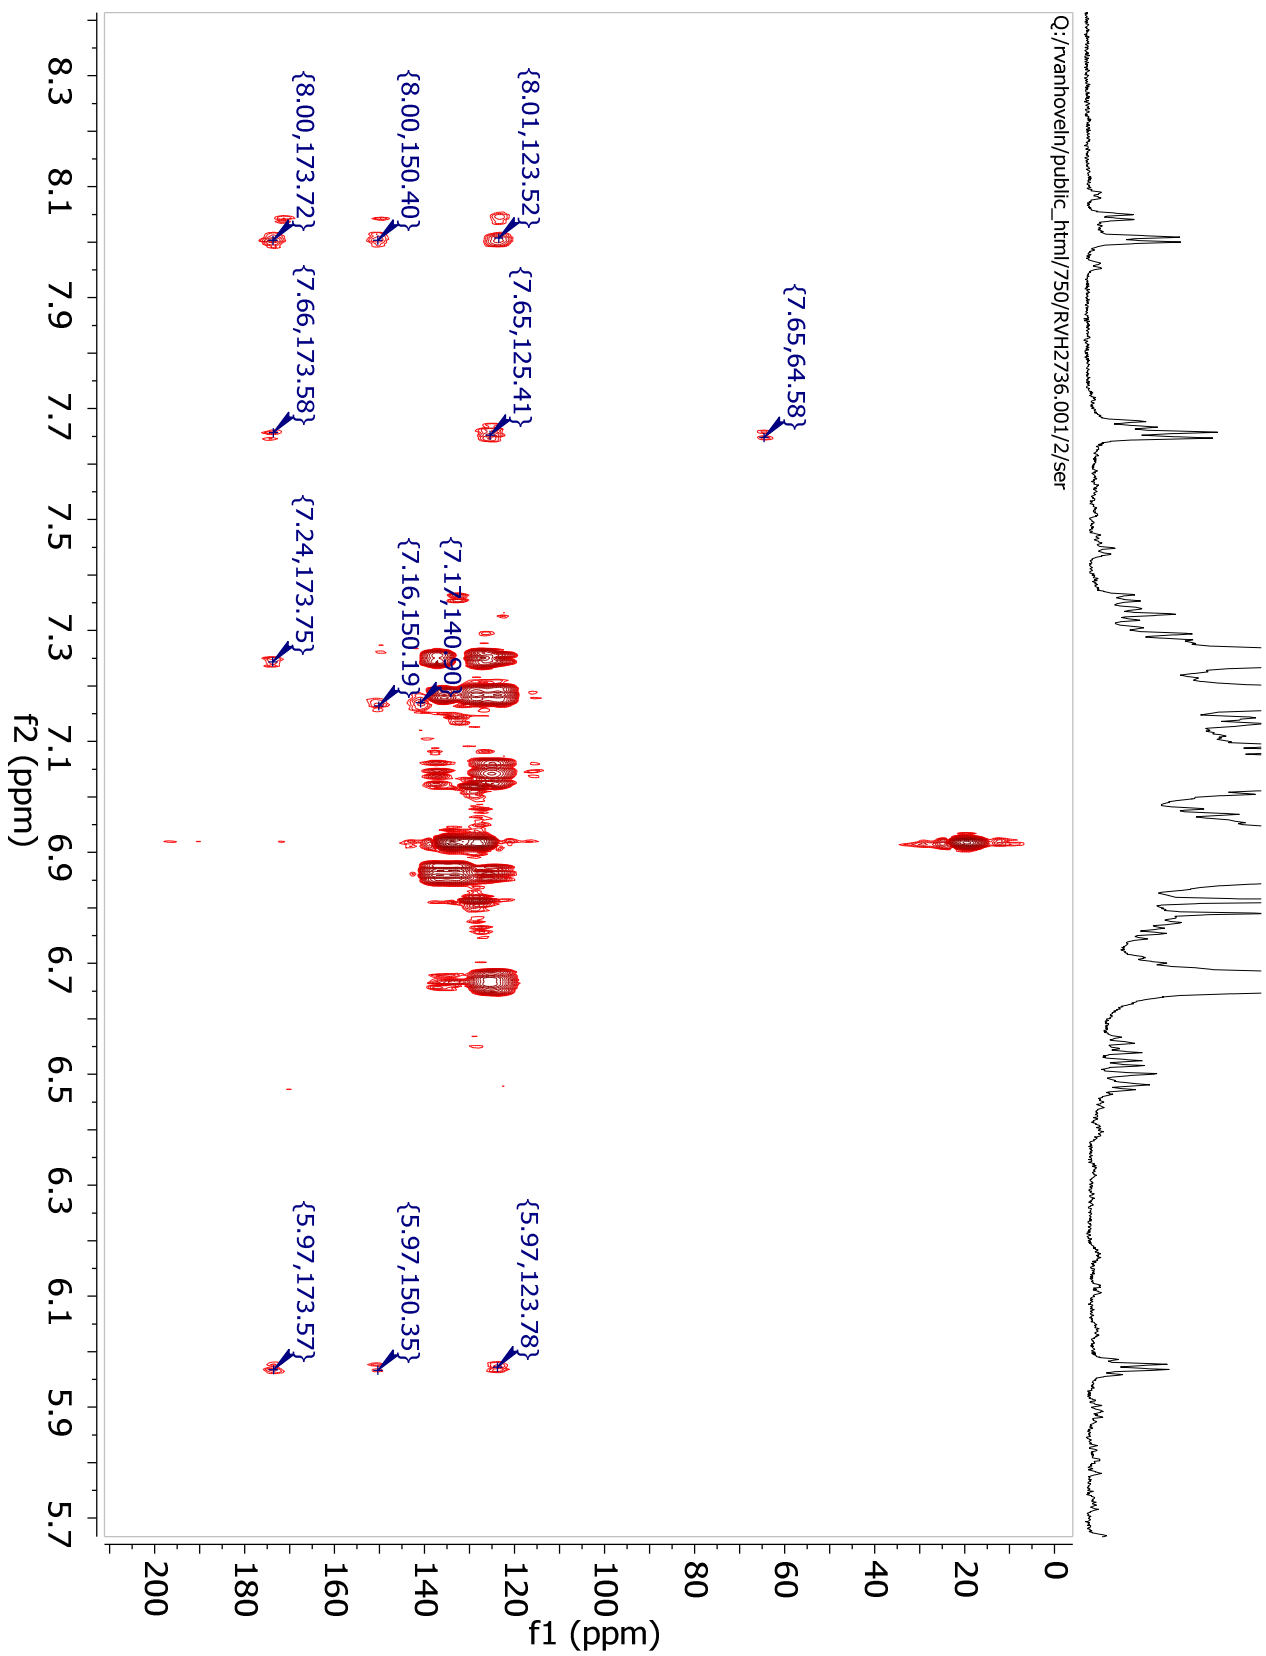

# HMBC with 1D-TOCSY trace

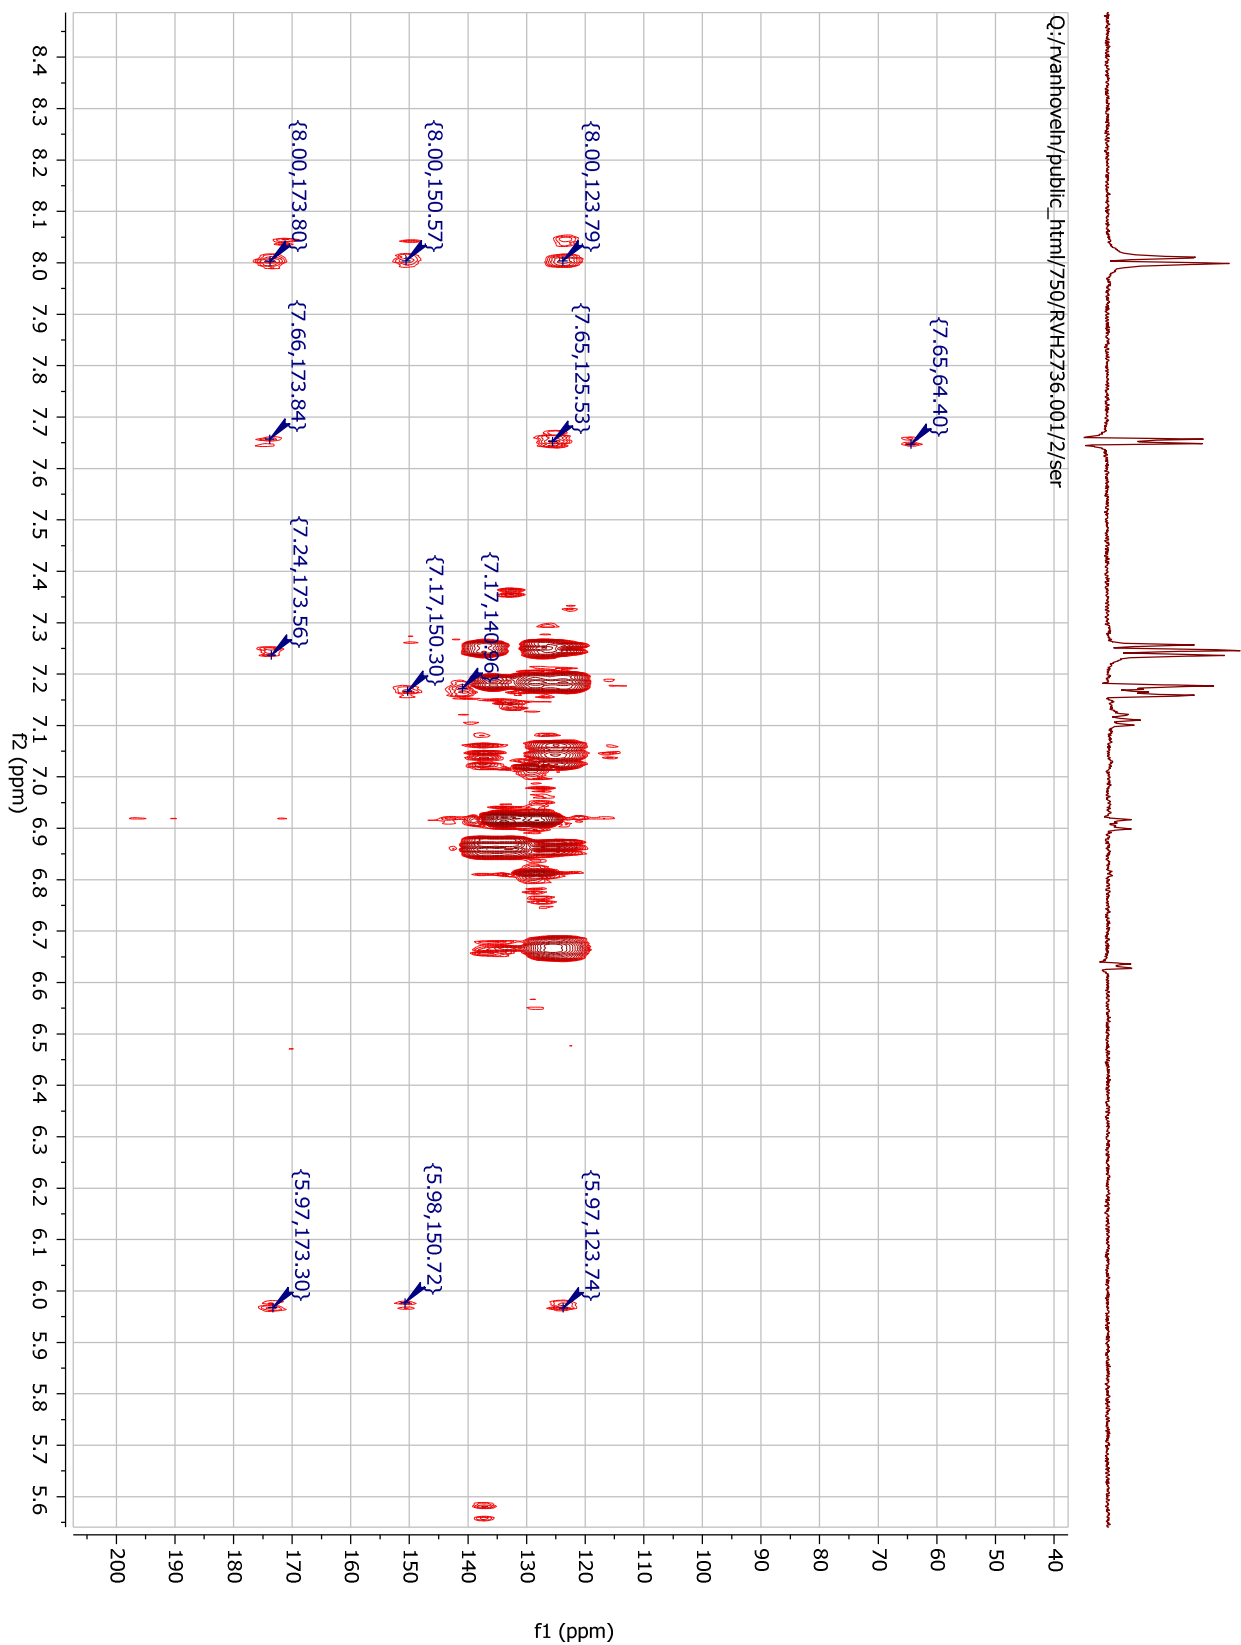



# HSQC with <sup>1</sup>H trace

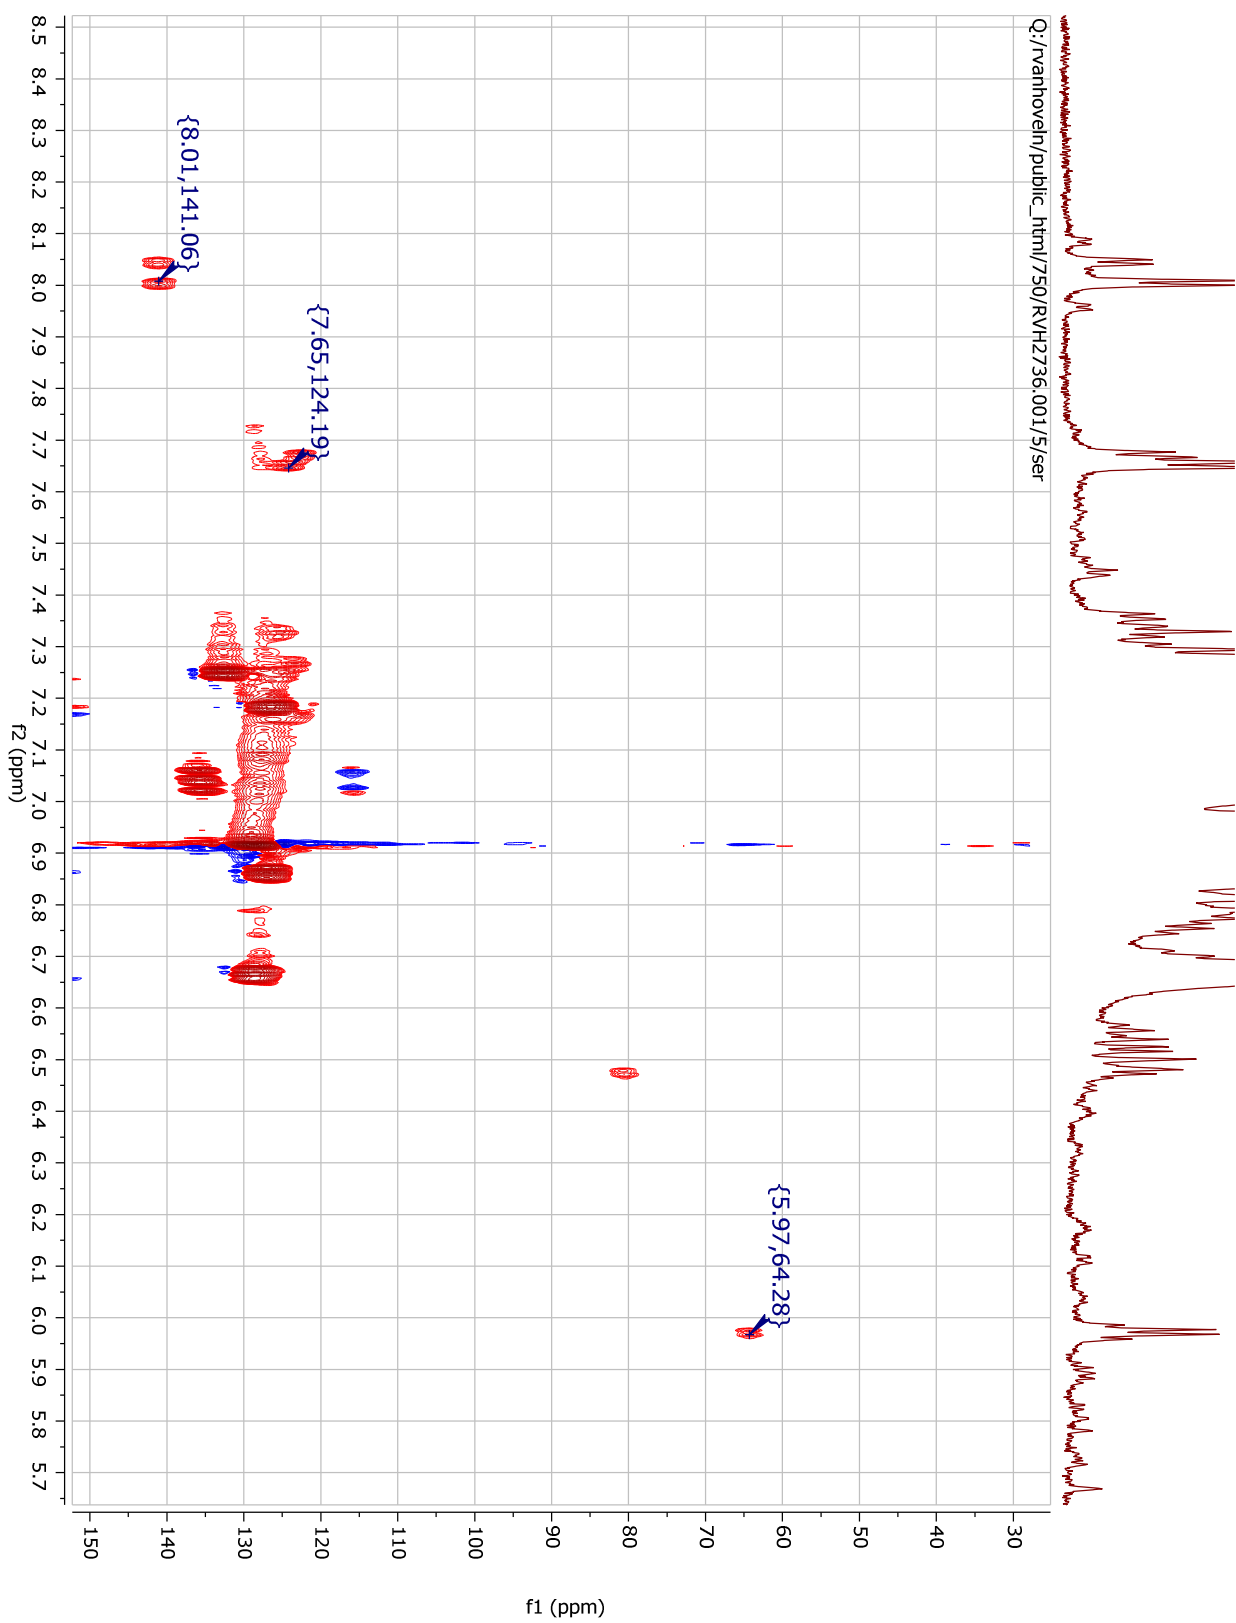

# HSQC with 1D-TOCSY trace

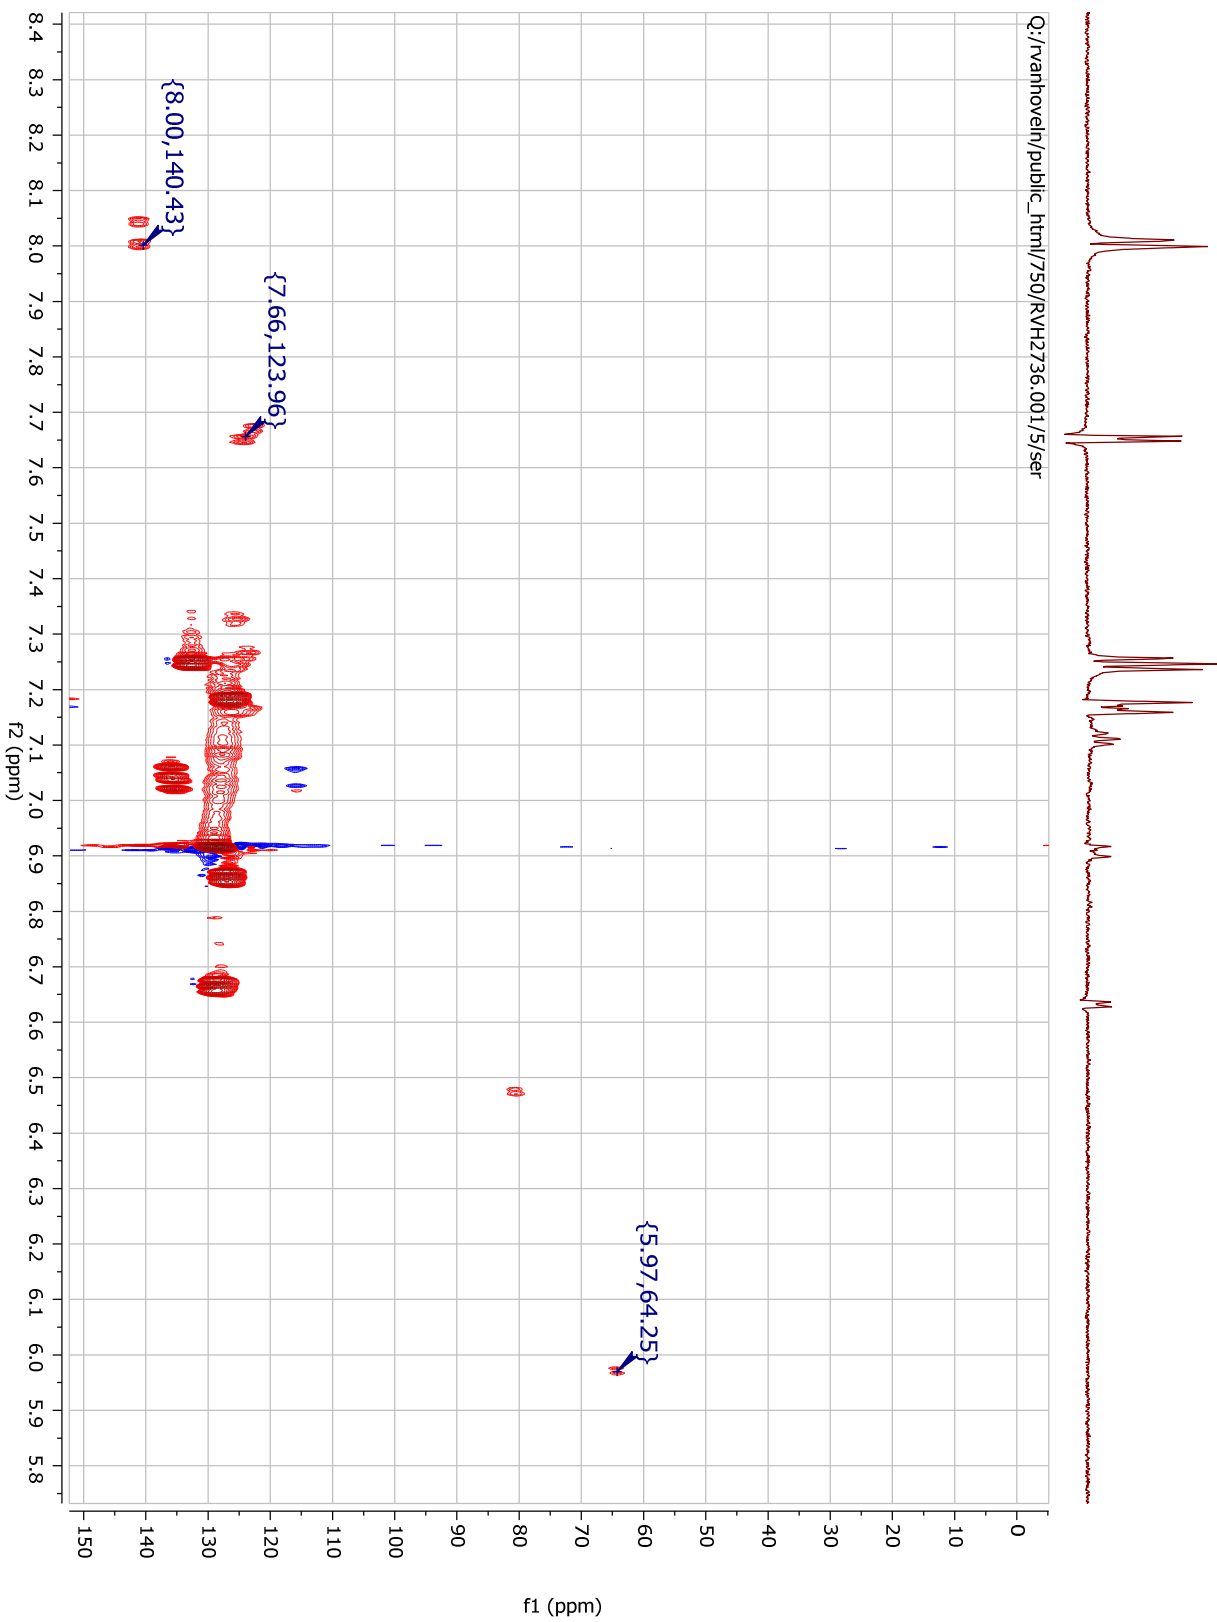

## VI. Factors impacting selectivity.

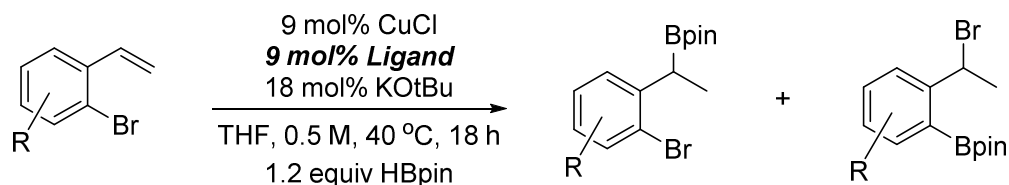

In a glovebox, CuCl (2.5 mg, 0.025 mmol, 10 mol%), KO<sup>t</sup>Bu (5.6 mg, 0.050 mmol, 20 mol%), the ligand (see Table 5 for exact amount, 0.025 mmol, 10 mol%) and 0.5 mL of dry, degassed THF were added to a dry round bottom flask. A rubber septum was placed on the flask and the flask was removed from the glovebox. Pinacol borane (HBpin, 0.05 mL, 0.35 mmol, 1.4 equiv) was added in one aliquot and then a 2-bromostyrene (see Table 2, 0.25 mmol, 1.0 equiv) was added. The reaction was transferred to a sand bath set to 40 °C and stirred for at least 30 min (typically, overnight). The reaction was quenched by filtering through a pad of celite eluted with diethyl ether. The solvent was removed *in vacuo* and the NMR yield was determined by using 1,1,1,2-tetrachloroethane as an internal standard (see Table 5).

**Table 5: Effects of ligand sterics and substrate electronics**

| entry | Ligand | Substrate         | Ligand Amt.<br>(mg or $\mu$ L) | Substrate amt.<br>( $\mu$ L) | Hydroboration<br>(%) | Migration<br>(%) |
|-------|--------|-------------------|--------------------------------|------------------------------|----------------------|------------------|
| 1     | dCype  | H                 | 11 mg                          | 40                           | 0                    | 94               |
| 2     | dMepe  | H                 | 4.0 $\mu$ L                    | 40                           | 91                   | 0                |
| 3     | dEtpe  | H                 | 6 $\mu$ L                      | 40                           | 98                   | 0                |
| 4     | Ph-BPE | H                 | 13 mg                          | 40                           | 0                    | 37               |
| 5     | dCype  | 5-F               | 11 mg                          | 40                           | 28                   | 49               |
| 6     | Ph-BPE | 5-F               | 13 mg                          | 40                           | 0                    | 21               |
| 7     | dCype  | 5-CF <sub>3</sub> | 11 mg                          | 40                           | 31                   | 28               |
| 8     | Ph-BPE | 5-CF <sub>3</sub> | 13 mg                          | 40                           | 6                    | 14               |
| 9     | dCype  | 5-OMe             | 11 mg                          | 40                           | 0                    | 87               |
| 10    | dMepe  | 5-OMe             | 4.0 $\mu$ L                    | 40                           | 52                   | 0                |
| 11    | dEtpe  | 5-OMe             | 6 $\mu$ L                      | 40                           | 100                  | 0                |

|    |       |         |             |    |    |    |
|----|-------|---------|-------------|----|----|----|
| 12 | dCype | 3,5-OMe | 11 mg       | 50 | 0  | 98 |
| 13 | dMepe | 3,5-OMe | 4.0 $\mu$ L | 50 | 40 | 16 |
| 14 | dEtpe | 3,5-OMe | 6 $\mu$ L   | 50 | 32 | 17 |

Spectra of benzyl bromides and boronic esters for entries 1-6,<sup>3</sup> 9-11<sup>7</sup> match previously reported data.

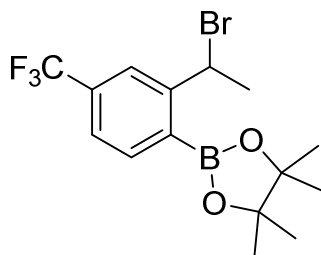

**2-[2-(1-bromoethyl)-4-trifluoromethylphenyl]-4,4,5,5-tetramethyl-1,3,2-**

**dioxaborolane (Table 1, entries 7-8).** <sup>1</sup>H NMR (500 MHz, CDCl<sub>3</sub>)  $\delta$  7.93–7.86 (m, 2H), 7.49 (dd,  $J$  = 7.9, 0.9 Hz, 1H), 6.22 (q,  $J$  = 6.9 Hz, 1H), 2.03 (d,  $J$  = 6.9 Hz, 3H), 1.39 (s, 6H), 1.37 (s, 6H). <sup>13</sup>C NMR (126 MHz, CDCl<sub>3</sub>)  $\delta$  150.3, 136.4, 133.2 (q,  $J$  = 32.3 Hz), 123.9 (q,  $J$  = 272.6 Hz), 123.7 (q,  $J$  = 3.7 Hz), 123.1 (q,  $J$  = 3.8 Hz), 84.4, 46.9, 26.8, 25.0, 24. HRMS (EI)  $m/z$  calculated for C<sub>15</sub>H<sub>19</sub>BBrF<sub>3</sub>O<sub>2</sub> [M]<sup>+</sup> 378.0611, found 378.0608.

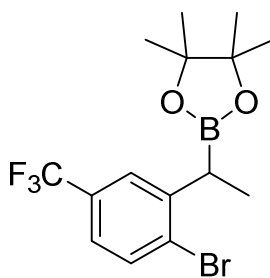

**2-[1-(2-bromo-5-trifluoromethylphenyl)ethyl]-4,4,5,5-tetramethyl-1,3,2-**

**dioxaborolane (Table 1, entries 7-8).** <sup>1</sup>H NMR (500 MHz, CDCl<sub>3</sub>)  $\delta$  7.63 (d,  $J$  = 8.2 Hz, 1H), 7.50 (d,  $J$  = 2.2 Hz, 1H), 7.26 (dd,  $J$  = 8.3, 2.2 Hz, 1H), 2.82 (q,  $J$  = 7.5 Hz, 1H), 1.37 (d,  $J$  = 7.5 Hz, 3H), 1.24 (s, 12H). <sup>13</sup>C NMR (126 MHz, CDCl<sub>3</sub>)  $\delta$  145.7, 133.0,

129.8 (q,  $J = 32.4$  Hz), 128.7 (q,  $J = 1.6$  Hz), 125.5 (q,  $J = 3.8$  Hz), 124.1 (q,  $J = 272.2$  Hz), 123.4 (q,  $J = 3.8$  Hz), 83.7, 24.7, 24.6, 15.5. HRMS (EI)  $m/z$  calculated for  $C_{15}H_{19}BBrF_3O_2 [M]^+$  377.0645, found 377.0646.

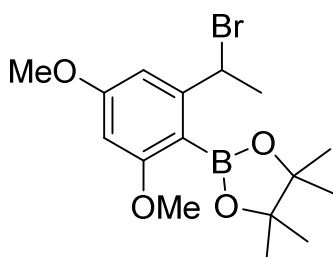

**2-[2-(1-bromoethyl)-4,6-dimethoxyphenyl]-4,4,5,5-tetramethyl-1,3,2-dioxaborolane** (Table 1, entries 12-14).  $^1H$  NMR (500 MHz,  $CDCl_3$ )  $\delta$  6.73 (d,  $J = 2.0$  Hz, 1H), 6.31 (d,  $J = 2.0$  Hz, 1H), 5.45 (q,  $J = 6.8$  Hz, 1H), 3.83 (s, 3H), 3.76 (s, 3H), 2.00 (d,  $J = 6.8$  Hz, 3H), 1.40 (s, 6H), 1.39 (s, 6H).  $^{13}C$  NMR (126 MHz,  $CDCl_3$ )  $\delta$  164.2, 162.3, 149.5, 103.2, 97.5, 83.8, 55.7, 55.3, 48.8, 27.1, 24.9, 24.7. HRMS (ESI)  $m/z$  calculated for  $C_{16}H_{25}BBrO_4 [M+H]^+$  371.1027, found 371.1032.

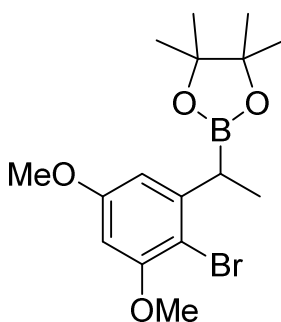

**2-[1-(2-bromo-3,5-dimethoxyphenyl)ethyl]-4,4,5,5-tetramethyl-1,3,2-dioxaborolane** (Table 1, entries 12-14).  $^1H$  NMR (500 MHz,  $CDCl_3$ )  $\delta$  6.49 (d,  $J = 2.7$  Hz, 1H), 6.35 (d,  $J = 2.7$  Hz, 1H), 3.88 (s, 3H), 3.82 (s, 3H), 2.83 (q,  $J = 7.5$  Hz, 1H), 1.35 (d,  $J = 7.7$  Hz, 3H), 1.27 (s, 12H).  $^{13}C$  NMR (126 MHz,  $CDCl_3$ )  $\delta$  159.5, 156.4, 146.6, 105.6, 105.1,

96.8, 83.5, 56.2, 55.4, 24.8, 24.7, 15.7. HRMS (EI)  $m/z$  calculated for  $C_{16}H_{25}BBrO_4$   
[M+H]<sup>+</sup> 370.1061, found 370.1057.

## VII. Transfer of stereochemistry with deuterated dihydronaphthalene.

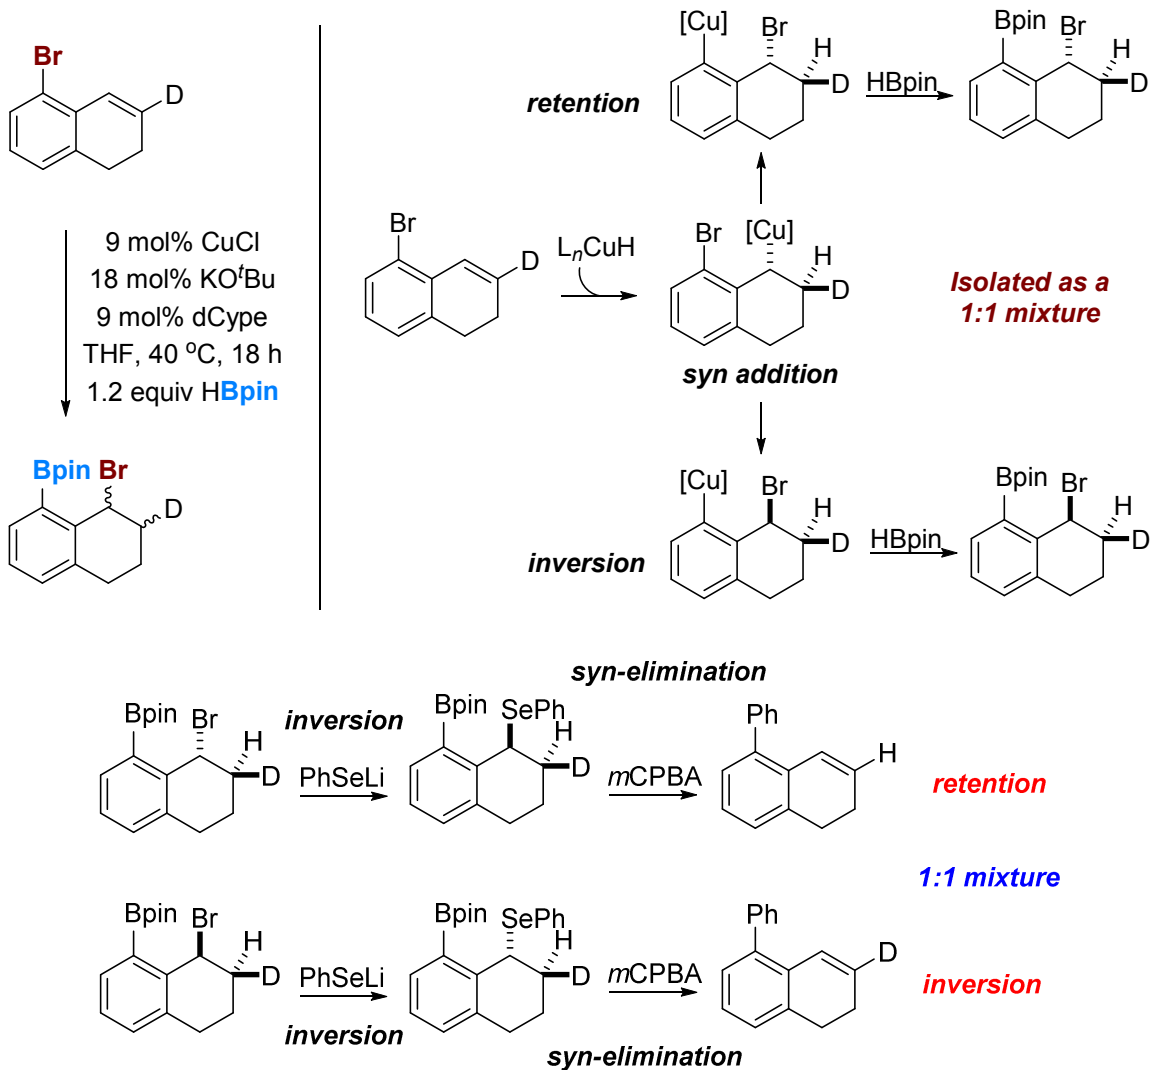

To better understand the nature of the 1,3-halogen migration, an experiment was designed to explore how stereochemical information in the reaction is transferred from the benzyl copper to the aryl copper species, and eventually to the final product. A deuterated dihydronaphthalene substrate was designed to determine if the stereochemistry set during the initial hydrocupration step was retained, inverted or ablated during the 1,3-halogen migration event. Since the hydrocupration of a  $\pi$ -bond occurs in a *syn* fashion to give a benzyl copper, the stereochemistry of the bromine relative to the deuterium in the

final product should indicate whether migration occurs with retention or inversion of stereochemistry. In the case of retention, the product should display an *anti* relationship between the two protons on adjacent carbons. If inversion is taking place, then the product should display a *syn* relationship between these same two protons. The benzyl bromide could not be isolated, as it degraded during attempted purification by column chromatography. Even so, NMRs of the two diastereomers of the product would be nearly identical, and therefore not diagnostic. An alternative strategy involved displacement of the benzyl bromide with lithium phenylselenoate, which proceeds with excellent inversion of stereochemistry.<sup>7</sup> Selenoxide eliminations are known to proceed through a *syn* elimination.<sup>8</sup> Thus, if migration occurs through inversion of stereochemistry, then deuterium should be incorporated into the final product. If migration occurs through retention of stereochemistry, then the final product should contain exclusively protons. Interestingly, the olefin that was isolated was nearly 50:50 proto:deutero, as supported by both the mass spec and NMR data, indicating the presence of a stereo-ablative step in the migration process.

**8-[2-(4,4,5,5-tetramethyl-1,3,2-dioxaborolane)]-1-(phenylselenyl)(2-D)-1,2,3,4-**

**tetrahydronaphthalene.** In a glovebox, a dry 25 mL round bottom flask was charged with CuCl (50 mg, 0.51 mmol, 10 mol%), KO<sup>t</sup>Bu (112 mg, 1.0 mmol, 20 mol%), and dCype (211 mg, 0.50 mmol, 10 mol%) in 10 mL of THF and allowed to stir for 10 min. HBpin (0.87 mL, 6.00 mmol, 1.21 equiv) was added in one aliquot and the reaction was stirred for a few minutes, followed by addition of the deuterated bromodihydronaphthalene (0.72 mL, 4.94 mmol, 1.0 equiv). The reaction was allowed to stir for 3 h at 40 °C. Meanwhile, lithium phenylselenoate was prepared by treating



selenium metal (0.394 g, 4.99 mmol, 1.01 equiv) in 5 mL of THF with phenyllithium (2.8 mL of a 1.8 M solution in dibutylether, 5.04 mmol, 1.01 equiv) and allowing it to stir for 30 min. The LiSePh solution was then transferred to the round bottom flask containing the 1,3-halogen migration reaction mixture, and allowed to stir at ambient temperature for 3 h. The reaction mixture was filtered through a pad of celite, washed with Et<sub>2</sub>O (2x10 mL) and the solvent removed *in vacuo*. The crude material was purified by column chromatography using hexanes/CH<sub>2</sub>Cl<sub>2</sub> as the eluant. A gradient was employed using 0–50% CH<sub>2</sub>Cl<sub>2</sub> in 10% increments. The purified product was isolated as a pale yellow, viscous oil in 47% yield. <sup>1</sup>H NMR (500 MHz, CDCl<sub>3</sub>) δ 7.60–7.53 (m, 3H), 7.30–7.08 (m, 3H), 7.13–7.09 (m, 2H), 5.78 (s, 1H), 2.90–2.73 (m, 2H), 2.41–2.22 (m, 1H), 2.06–1.92 (m, 1H), 1.79–1.66 (m, 1H), 1.33 (s, 6H), 1.32 (s, 6H). <sup>13</sup>C NMR (126 MHz, CDCl<sub>3</sub>) δ 141.0, 136.9, 133.4, 132.8, 132.1, 131.9, 128.8, 126.6, 126.0, 83.7, 42.9, 29.6, 27.8 (1,1,1-triplet, *J* = 19.6 Hz), 25.1, 24.6, 18.5. HRMS (EI) *m/z* calculated for C<sub>22</sub>H<sub>30</sub>DBSeO<sub>2</sub> [M+NH<sub>4</sub>]<sup>+</sup> 433.1675, found 433.1670.

**8-[2-(4,4,5,5-tetramethyl-1,3,2-dioxaborolane)]-2-deutero-3,4-dihydronaphthalene.<sup>9</sup>**

It was necessary to run the reaction at cold temperatures, using *m*CPBA as the oxidant to prevent competing oxidation of the boronic ester and olefin. The phenylselenide from above (0.206 g, 0.50 mmol, 1.0 equiv) was dissolved in ~1.5 mL of CH<sub>2</sub>Cl<sub>2</sub> in a vial. The vial was placed in an acetone/CO<sub>2</sub> bath and then *m*CPBA (0.125 g, 0.72 mmol, 1.45 equiv) in ~1 mL of CH<sub>2</sub>Cl<sub>2</sub> was added to the vial slowly. The reaction was allowed to stir for 15 min at -78 °C and then poured into 30 mL of 50:50 CH<sub>2</sub>Cl<sub>2</sub>:Et<sub>3</sub>N. The organic was washed with water and the aqueous layer was extracted once with CH<sub>2</sub>Cl<sub>2</sub>. The combined organic layers were dried with Na<sub>2</sub>SO<sub>4</sub> and concentrated *in vacuo*. The crude

product was purified by column chromatography using hexanes/CH<sub>2</sub>Cl<sub>2</sub> as the eluant. A gradient was employed using 0-50% CH<sub>2</sub>Cl<sub>2</sub> in 10% increments. The product was isolated in 73% yield. <sup>1</sup>H NMR (500 MHz, CDCl<sub>3</sub>) δ 7.64 (dd, *J* = 7.5, 1.5 Hz, 1H), 7.33 – 7.28 (m, 1H), 7.17 (dd, *J* = 7.4, 0.9 Hz, 1H), 7.10 (t, *J* = 7.4 Hz, 1H), 6.10 (dt, *J* = 9.8, 4.4 Hz, 0.5H), 2.78 (t, *J* = 8.2 Hz, 2H), 2.36 – 2.21 (m, 2H), 1.35 (s, 12H). <sup>13</sup>C NMR (126 MHz, CDCl<sub>3</sub>) δ 139.6, 135.4, 134.2, 130.4, 129.3, 129.0 (1,1,1-triplet, *J* = 24.3 Hz), 128.2, 128.0, 125.9, 83.5, 28.3, 24.9, 22.8, 22.7. HRMS (ESI) *m/z* calculated for C<sub>16</sub>H<sub>24</sub>BNO<sub>2</sub> [M+NH<sub>4</sub>]<sup>+</sup> 273.2009, found 273.2012.

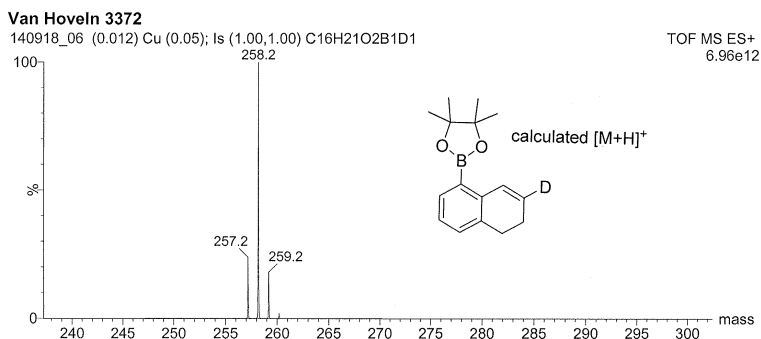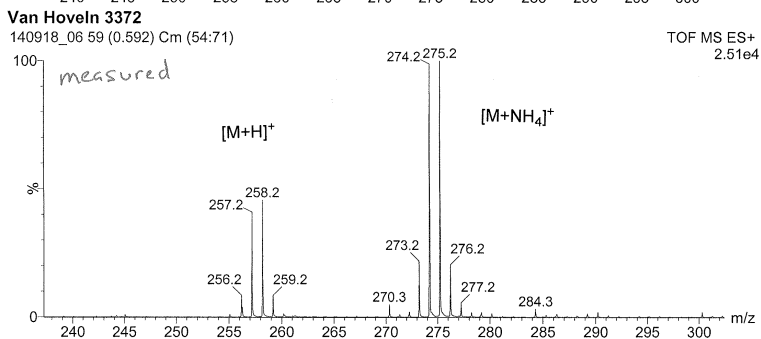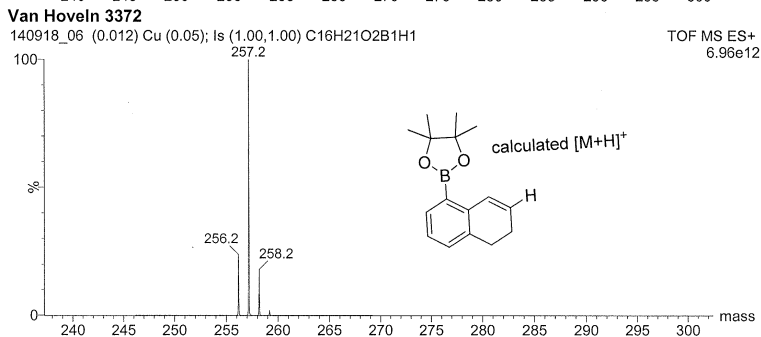

## VIII. Computational details and optimized geometries.

All structures throughout these studies (except where noted) were optimized with Gaussian 09<sup>10</sup> using the M06<sup>11</sup> functional (unless otherwise noted) with a 6-311G\* basis set for H, B, C, O, P, and Br<sup>12</sup> and a LANL2TZ+ basis set designed for copper (unless otherwise indicated).<sup>13</sup> An SMD continuum solvent model was used with THF as the solvent.<sup>14</sup> All minima were checked for absence of imaginary vibrational modes and all transition states were checked for one imaginary vibrational mode and confirmed with IRC<sup>15</sup> calculations.

### A. Impact of steric bulk on hydroboration of benzyl copper.

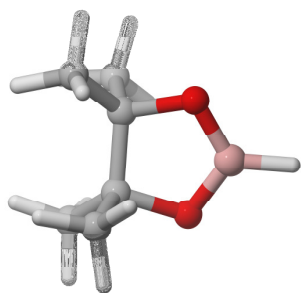

pinacol borane (HBpin) (entry 1)

RM06 energy: -411.6949742

Sum of electronic and thermal Free Energies: -411.53869

|   |           |           |           |
|---|-----------|-----------|-----------|
| 6 | -0.777774 | -0.188563 | 0.054067  |
| 8 | -1.065963 | 1.191305  | 0.407590  |
| 5 | -0.000002 | 1.928162  | 0.000002  |
| 8 | 1.065962  | 1.191309  | -0.407584 |
| 6 | 0.777774  | -0.188562 | -0.054067 |
| 6 | 1.472695  | -0.446512 | 1.269144  |
| 1 | 1.379804  | -1.492214 | 1.581852  |
| 1 | 2.539302  | -0.221746 | 1.159936  |
| 1 | 1.079216  | 0.190231  | 2.069403  |
| 6 | 1.341781  | -1.095676 | -1.120875 |
| 1 | 2.435189  | -1.024740 | -1.126912 |
| 1 | 1.078151  | -2.141385 | -0.921025 |
| 1 | 0.984050  | -0.833537 | -2.120512 |

|   |           |           |           |
|---|-----------|-----------|-----------|
| 1 | -0.000002 | 3.114082  | 0.000009  |
| 6 | -1.472695 | -0.446506 | -1.269146 |
| 1 | -1.079218 | 0.190242  | -2.069402 |
| 1 | -1.379803 | -1.492207 | -1.581859 |
| 1 | -2.539302 | -0.221743 | -1.159936 |
| 6 | -1.341778 | -1.095684 | 1.120869  |
| 1 | -2.435187 | -1.024749 | 1.126908  |
| 1 | -1.078148 | -2.141391 | 0.921014  |
| 1 | -0.984047 | -0.833551 | 2.120508  |

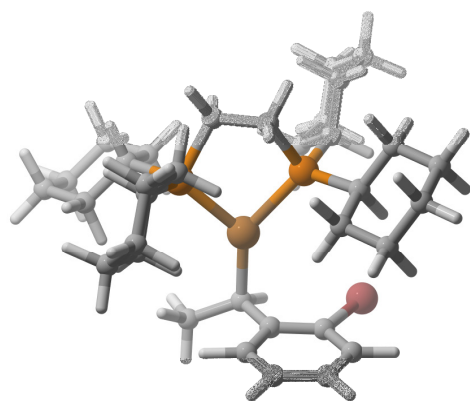

benzyl copper (dCype) (entry 2)

RM06 energy: -4781.6101141

Sum of electronic and thermal Free Energies: -4780.849906

|    |           |           |           |
|----|-----------|-----------|-----------|
| 6  | 0.005603  | 0.788502  | 2.453552  |
| 6  | -1.463952 | 1.080488  | 2.154490  |
| 15 | -2.126424 | 0.070605  | 0.739439  |
| 6  | -2.811384 | -1.484297 | 1.514505  |
| 1  | -3.844916 | -1.256138 | 1.830206  |
| 6  | -2.041506 | -1.967758 | 2.741485  |
| 6  | -2.665458 | -3.237553 | 3.307585  |
| 6  | -2.736595 | -4.341855 | 2.264151  |
| 6  | -3.466496 | -3.869233 | 1.015892  |
| 6  | -2.837532 | -2.598523 | 0.465636  |
| 1  | -3.357433 | -2.277093 | -0.446021 |
| 1  | -1.796825 | -2.805521 | 0.160982  |
| 1  | -4.523863 | -3.674401 | 1.259384  |
| 1  | -3.464760 | -4.653614 | 0.247664  |

|    |           |           |           |
|----|-----------|-----------|-----------|
| 1  | -3.220561 | -5.234377 | 2.682183  |
| 1  | -1.713146 | -4.643367 | 1.988553  |
| 1  | -3.681747 | -3.007743 | 3.665959  |
| 1  | -2.097518 | -3.572666 | 4.185594  |
| 1  | -0.996961 | -2.176444 | 2.455276  |
| 1  | -2.008863 | -1.192901 | 3.517407  |
| 6  | -3.639584 | 1.049942  | 0.276196  |
| 1  | -4.156020 | 1.323068  | 1.214608  |
| 6  | -3.212766 | 2.325855  | -0.451476 |
| 6  | -4.410359 | 3.154938  | -0.892460 |
| 6  | -5.352279 | 2.339147  | -1.762438 |
| 6  | -5.792654 | 1.076009  | -1.040483 |
| 6  | -4.598017 | 0.242372  | -0.596990 |
| 1  | -4.950548 | -0.651393 | -0.066338 |
| 1  | -4.054299 | -0.115241 | -1.487580 |
| 1  | -6.389730 | 1.351790  | -0.156204 |
| 1  | -6.449293 | 0.472049  | -1.680489 |
| 1  | -6.223378 | 2.939260  | -2.056077 |
| 1  | -4.835246 | 2.062989  | -2.695951 |
| 1  | -4.953605 | 3.510935  | -0.002243 |
| 1  | -4.068384 | 4.051549  | -1.425622 |
| 1  | -2.552773 | 2.933375  | 0.181340  |
| 1  | -2.615370 | 2.044289  | -1.336183 |
| 29 | -0.336394 | 0.064735  | -0.758431 |
| 15 | 1.051288  | 0.869539  | 0.917830  |
| 6  | 2.572206  | -0.100555 | 1.350891  |
| 6  | 3.305677  | 0.313334  | 2.622724  |
| 6  | 4.546601  | -0.542523 | 2.850028  |
| 6  | 4.210927  | -2.025769 | 2.863983  |
| 6  | 3.493011  | -2.432924 | 1.586119  |
| 6  | 2.241779  | -1.594274 | 1.368020  |
| 1  | 1.531356  | -1.805973 | 2.183889  |
| 1  | 1.740028  | -1.881487 | 0.431889  |
| 1  | 4.171766  | -2.298833 | 0.727912  |
| 1  | 3.231759  | -3.499322 | 1.609165  |
| 1  | 3.563084  | -2.244093 | 3.728845  |
| 1  | 5.121775  | -2.623267 | 3.001533  |
| 1  | 5.271217  | -0.344367 | 2.043846  |
| 1  | 5.038930  | -0.247953 | 3.786323  |
| 1  | 3.591988  | 1.372002  | 2.577232  |
| 1  | 2.627330  | 0.208272  | 3.485251  |
| 1  | 3.236306  | 0.079297  | 0.486382  |
| 6  | 1.610724  | 2.642195  | 0.760178  |
| 6  | 1.629553  | 3.469886  | 2.042580  |
| 6  | 2.161150  | 4.874028  | 1.782201  |
| 6  | 1.348696  | 5.582027  | 0.709025  |

|    |           |           |           |
|----|-----------|-----------|-----------|
| 6  | 1.301379  | 4.761847  | -0.571193 |
| 6  | 0.781205  | 3.355557  | -0.310698 |
| 1  | 0.769911  | 2.765816  | -1.237168 |
| 1  | -0.268639 | 3.413384  | 0.025585  |
| 1  | 0.680477  | 5.260315  | -1.327337 |
| 1  | 2.315291  | 4.694698  | -0.998078 |
| 1  | 0.321656  | 5.736509  | 1.078173  |
| 1  | 1.759403  | 6.580941  | 0.512271  |
| 1  | 2.158551  | 5.455021  | 2.714298  |
| 1  | 3.213259  | 4.809052  | 1.460852  |
| 1  | 0.603735  | 3.547884  | 2.437694  |
| 1  | 2.222766  | 2.978438  | 2.823413  |
| 1  | 2.646158  | 2.556862  | 0.382955  |
| 6  | -0.197901 | -0.477476 | -2.709392 |
| 6  | -1.546594 | -0.781825 | -3.330399 |
| 1  | -1.480338 | -1.318880 | -4.295672 |
| 1  | -2.199147 | -1.386830 | -2.685009 |
| 1  | -2.097828 | 0.148072  | -3.524731 |
| 6  | 0.690868  | -1.604338 | -2.475614 |
| 6  | 0.190618  | -2.916085 | -2.267577 |
| 6  | 1.001632  | -3.994629 | -1.961779 |
| 6  | 2.380411  | -3.843663 | -1.860621 |
| 6  | 2.922150  | -2.582460 | -2.081456 |
| 6  | 2.099776  | -1.510332 | -2.378325 |
| 35 | 2.968710  | 0.179066  | -2.654365 |
| 1  | 3.998902  | -2.432938 | -2.024604 |
| 1  | 3.027258  | -4.685759 | -1.626086 |
| 1  | 0.548133  | -4.973319 | -1.808865 |
| 1  | -0.883587 | -3.073500 | -2.348244 |
| 1  | 0.314916  | 0.331860  | -3.240605 |
| 1  | -2.085256 | 0.944611  | 3.050233  |
| 1  | -1.580155 | 2.133305  | 1.862455  |
| 1  | 0.116016  | -0.232144 | 2.840218  |
| 1  | 0.380497  | 1.456792  | 3.237769  |

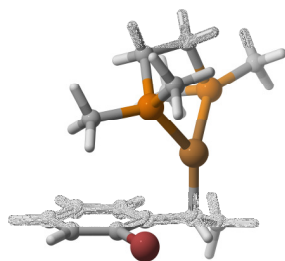

benzyl copper (dMepe) (entry 3)

RM06 energy: -4000.5973263

Sum of electronic and thermal Free Energies: -4000.30738

|    |           |           |           |
|----|-----------|-----------|-----------|
| 6  | -2.345235 | 1.670202  | 1.334663  |
| 6  | -3.460983 | 1.030160  | 0.521344  |
| 15 | -2.919571 | -0.571402 | -0.236522 |
| 6  | -2.823427 | -1.651164 | 1.245010  |
| 1  | -3.706453 | -1.534632 | 1.886804  |
| 1  | -2.758303 | -2.698123 | 0.928950  |
| 1  | -1.924936 | -1.426656 | 1.830486  |
| 6  | -4.491654 | -1.142130 | -0.985158 |
| 1  | -5.303123 | -1.149603 | -0.246562 |
| 1  | -4.776275 | -0.486740 | -1.814639 |
| 1  | -4.369578 | -2.154394 | -1.383886 |
| 29 | -0.655152 | -0.172280 | -0.834138 |
| 15 | -0.777527 | 1.804830  | 0.358551  |
| 6  | 0.408333  | 2.303742  | 1.656993  |
| 1  | 1.359817  | 2.598702  | 1.202555  |
| 1  | 0.020864  | 3.147583  | 2.242077  |
| 1  | 0.601796  | 1.461628  | 2.330955  |
| 6  | -1.028826 | 3.370864  | -0.554172 |
| 1  | -0.119673 | 3.621669  | -1.111565 |
| 1  | -1.843159 | 3.261139  | -1.278090 |
| 1  | -1.264905 | 4.197964  | 0.127181  |
| 6  | 0.762528  | -1.535971 | -1.294469 |
| 6  | 0.169721  | -2.887092 | -1.639289 |
| 1  | 0.895110  | -3.719724 | -1.578020 |
| 1  | -0.681506 | -3.170674 | -1.003844 |
| 1  | -0.217796 | -2.880095 | -2.665646 |
| 6  | 1.430349  | -1.408264 | -0.007875 |
| 6  | 1.081200  | -2.223869 | 1.098967  |
| 6  | 1.640015  | -2.069808 | 2.355294  |
| 6  | 2.607033  | -1.098272 | 2.592293  |
| 6  | 2.996586  | -0.285683 | 1.533670  |
| 6  | 2.423686  | -0.442446 | 0.284825  |
| 35 | 3.010023  | 0.764124  | -1.085067 |
| 1  | 3.755771  | 0.480110  | 1.682251  |
| 1  | 3.059408  | -0.977527 | 3.573588  |
| 1  | 1.322537  | -2.729307 | 3.162125  |
| 1  | 0.331354  | -2.999331 | 0.950628  |
| 1  | 1.380395  | -1.144729 | -2.108695 |
| 1  | -4.354869 | 0.860775  | 1.138547  |
| 1  | -3.764275 | 1.688626  | -0.305628 |
| 1  | -2.115698 | 1.059193  | 2.219460  |
| 1  | -2.637391 | 2.662879  | 1.705317  |

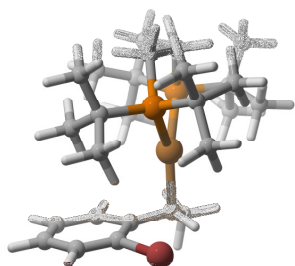

benzyl copper (dtBupe) (entry 4)

RM06 energy: -4472.0714495

Sum of electronic and thermal Free Energies: -4471.456222

|    |           |           |           |
|----|-----------|-----------|-----------|
| 6  | -1.430885 | 2.148981  | 1.238630  |
| 6  | -2.667975 | 1.555534  | 0.558961  |
| 15 | -2.507872 | -0.223075 | 0.021793  |
| 6  | -3.221742 | -1.233080 | 1.460105  |
| 6  | -4.713112 | -1.055638 | 1.704382  |
| 1  | -5.324934 | -1.470598 | 0.897203  |
| 1  | -4.996018 | -1.588885 | 2.623849  |
| 1  | -4.995902 | -0.005105 | 1.844992  |
| 6  | -2.904784 | -2.708776 | 1.231459  |
| 1  | -1.827305 | -2.871583 | 1.101633  |
| 1  | -3.220125 | -3.288830 | 2.110364  |
| 1  | -3.415867 | -3.131727 | 0.361881  |
| 6  | -2.465540 | -0.801426 | 2.712941  |
| 1  | -1.381969 | -0.927571 | 2.597446  |
| 1  | -2.671312 | 0.236595  | 2.997772  |
| 1  | -2.774640 | -1.434642 | 3.556077  |
| 6  | -3.673486 | -0.293811 | -1.475630 |
| 6  | -4.992392 | 0.453618  | -1.317373 |
| 1  | -4.853350 | 1.520303  | -1.108597 |
| 1  | -5.557122 | 0.386887  | -2.258857 |
| 1  | -5.628573 | 0.037031  | -0.531751 |
| 6  | -2.895671 | 0.332829  | -2.631678 |
| 1  | -1.921093 | -0.150333 | -2.785686 |
| 1  | -3.472326 | 0.225462  | -3.561035 |
| 1  | -2.724203 | 1.404875  | -2.486911 |
| 6  | -3.953674 | -1.747405 | -1.838409 |
| 1  | -3.031643 | -2.335500 | -1.924739 |
| 1  | -4.613224 | -2.242593 | -1.118595 |



|    |           |           |           |
|----|-----------|-----------|-----------|
| 1  | -4.458570 | -1.785429 | -2.813875 |
| 29 | -0.188864 | -0.351535 | -0.535314 |
| 15 | 0.199386  | 1.762739  | 0.419323  |
| 6  | 1.398360  | 1.804398  | 1.892022  |
| 6  | 2.837632  | 1.888755  | 1.395980  |
| 1  | 3.518273  | 1.699017  | 2.238363  |
| 1  | 3.061358  | 1.139577  | 0.626729  |
| 1  | 3.087845  | 2.877733  | 0.997919  |
| 6  | 1.147615  | 2.917856  | 2.902724  |
| 1  | 1.863911  | 2.814695  | 3.730846  |
| 1  | 1.287864  | 3.916705  | 2.482125  |
| 1  | 0.145763  | 2.873881  | 3.344167  |
| 6  | 1.222702  | 0.460499  | 2.596102  |
| 1  | 1.952491  | 0.376152  | 3.413905  |
| 1  | 0.228391  | 0.350893  | 3.042452  |
| 1  | 1.389831  | -0.384378 | 1.917081  |
| 6  | 0.524730  | 3.224729  | -0.744595 |
| 6  | 1.707930  | 2.874613  | -1.642077 |
| 1  | 1.556101  | 1.917044  | -2.155589 |
| 1  | 1.825120  | 3.652646  | -2.410137 |
| 1  | 2.654382  | 2.809159  | -1.098478 |
| 6  | -0.703259 | 3.347319  | -1.640291 |
| 1  | -0.922561 | 2.405701  | -2.157468 |
| 1  | -1.598736 | 3.665996  | -1.094637 |
| 1  | -0.512162 | 4.103808  | -2.414078 |
| 6  | 0.766497  | 4.563190  | -0.062308 |
| 1  | 1.709504  | 4.590756  | 0.493042  |
| 1  | 0.822682  | 5.352814  | -0.825815 |
| 1  | -0.044375 | 4.837965  | 0.623326  |
| 6  | 0.798945  | -1.929508 | -1.381627 |
| 6  | -0.144162 | -3.057718 | -1.756926 |
| 1  | 0.377236  | -4.005474 | -1.988572 |
| 1  | -0.884611 | -3.294910 | -0.981078 |
| 1  | -0.722554 | -2.790725 | -2.651047 |
| 6  | 1.721293  | -2.195801 | -0.286602 |
| 6  | 1.361465  | -3.038406 | 0.796461  |
| 6  | 2.173418  | -3.242174 | 1.896804  |
| 6  | 3.416832  | -2.624413 | 1.989334  |
| 6  | 3.831287  | -1.819204 | 0.935583  |
| 6  | 3.011649  | -1.631495 | -0.164522 |
| 35 | 3.718998  | -0.548986 | -1.583238 |
| 1  | 4.809249  | -1.341836 | 0.963096  |
| 1  | 4.061400  | -2.776617 | 2.851571  |
| 1  | 1.830898  | -3.897469 | 2.696757  |
| 1  | 0.394895  | -3.539073 | 0.756985  |
| 1  | 1.334437  | -1.567424 | -2.265640 |

|   |           |          |           |
|---|-----------|----------|-----------|
| 1 | -3.543755 | 1.687852 | 1.208775  |
| 1 | -2.887854 | 2.119072 | -0.353493 |
| 1 | -1.351314 | 1.747476 | 2.254654  |
| 1 | -1.558187 | 3.233891 | 1.357069  |

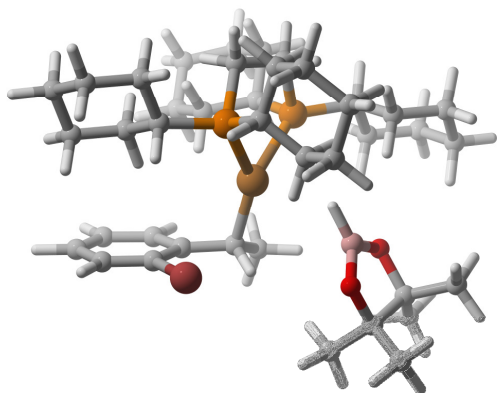

benzyl copper (dCype) – Hbpin complex

RM06 energy: -5193.3191934

Sum of electronic and thermal Free Energies: -5192.375813

|    |           |          |           |
|----|-----------|----------|-----------|
| 6  | -1.710495 | 1.692197 | 2.079932  |
| 6  | -0.356743 | 2.396917 | 2.053770  |
| 15 | 0.576976  | 2.179445 | 0.460192  |
| 6  | -0.143363 | 3.429280 | -0.716108 |
| 1  | 0.594014  | 3.431548 | -1.536903 |
| 6  | -0.288603 | 4.857969 | -0.206852 |
| 6  | -0.734441 | 5.784703 | -1.332942 |
| 6  | -2.023328 | 5.297357 | -1.981681 |
| 6  | -1.896613 | 3.856954 | -2.458587 |
| 6  | -1.458835 | 2.942783 | -1.323438 |
| 1  | -1.357138 | 1.904169 | -1.670692 |
| 1  | -2.244932 | 2.936932 | -0.552060 |
| 1  | -1.154630 | 3.802415 | -3.272626 |
| 1  | -2.847480 | 3.504754 | -2.881939 |
| 1  | -2.306244 | 5.955656 | -2.813770 |
| 1  | -2.841006 | 5.359888 | -1.245456 |
| 1  | 0.061717  | 5.830753 | -2.093535 |
| 1  | -0.859072 | 6.808122 | -0.953875 |
| 1  | -1.037771 | 4.884424 | 0.600695  |
| 1  | 0.651831  | 5.224298 | 0.227819  |
| 6  | 2.234033  | 2.907814 | 0.908470  |
| 1  | 2.058581  | 3.869025 | 1.423228  |

|    |           |           |           |
|----|-----------|-----------|-----------|
| 6  | 2.977034  | 1.970856  | 1.864824  |
| 6  | 4.373478  | 2.480215  | 2.195336  |
| 6  | 5.188001  | 2.707601  | 0.932684  |
| 6  | 4.468079  | 3.666058  | -0.001254 |
| 6  | 3.072263  | 3.163446  | -0.344279 |
| 1  | 2.574568  | 3.885705  | -1.004095 |
| 1  | 3.157152  | 2.224158  | -0.916312 |
| 1  | 4.390337  | 4.654374  | 0.480819  |
| 1  | 5.044776  | 3.816689  | -0.923623 |
| 1  | 6.188951  | 3.085343  | 1.179429  |
| 1  | 5.330877  | 1.743653  | 0.417770  |
| 1  | 4.297003  | 3.426622  | 2.755306  |
| 1  | 4.879820  | 1.766911  | 2.859748  |
| 1  | 2.407552  | 1.830452  | 2.793629  |
| 1  | 3.061650  | 0.979160  | 1.394388  |
| 29 | -0.130473 | 0.021996  | -0.282038 |
| 15 | -1.598203 | -0.078949 | 1.522393  |
| 6  | -3.364179 | -0.569751 | 1.222197  |
| 6  | -4.328006 | -0.350268 | 2.386128  |
| 6  | -5.728683 | -0.848926 | 2.047298  |
| 6  | -6.255463 | -0.207977 | 0.773035  |
| 6  | -5.297168 | -0.438319 | -0.384690 |
| 6  | -3.899094 | 0.068875  | -0.058301 |
| 1  | -3.937760 | 1.163977  | 0.061923  |
| 1  | -3.216473 | -0.136098 | -0.894562 |
| 1  | -5.244109 | -1.517610 | -0.604783 |
| 1  | -5.666548 | 0.043758  | -1.299810 |
| 1  | -7.253322 | -0.597853 | 0.531588  |
| 1  | -6.377215 | 0.875681  | 0.934488  |
| 1  | -5.700148 | -1.942593 | 1.917758  |
| 1  | -6.408135 | -0.655119 | 2.888036  |
| 1  | -3.966081 | -0.854403 | 3.292347  |
| 1  | -4.378343 | 0.724994  | 2.622102  |
| 1  | -3.282528 | -1.656242 | 1.036938  |
| 6  | -1.138176 | -1.083806 | 3.036963  |
| 6  | -1.279123 | -0.370296 | 4.378899  |
| 6  | -0.922577 | -1.292809 | 5.538056  |
| 6  | 0.479194  | -1.861194 | 5.383625  |
| 6  | 0.629044  | -2.575754 | 4.050125  |
| 6  | 0.266539  | -1.665377 | 2.886586  |
| 1  | 0.348020  | -2.208456 | 1.935486  |
| 1  | 0.994979  | -0.839356 | 2.827563  |
| 1  | 1.652416  | -2.954234 | 3.924581  |
| 1  | -0.030138 | -3.458817 | 4.035383  |
| 1  | 1.211751  | -1.039206 | 5.439888  |
| 1  | 0.713079  | -2.540220 | 6.214090  |

|    |           |           |           |
|----|-----------|-----------|-----------|
| 1  | -1.018047 | -0.751136 | 6.488696  |
| 1  | -1.648999 | -2.120671 | 5.579212  |
| 1  | -0.604740 | 0.501252  | 4.401028  |
| 1  | -2.294029 | 0.024154  | 4.513327  |
| 1  | -1.851638 | -1.927166 | 3.015713  |
| 5  | 2.771564  | -1.389875 | 0.031716  |
| 1  | 1.902656  | -0.882636 | 0.656616  |
| 8  | 3.772033  | -0.669085 | -0.546460 |
| 6  | 4.775468  | -1.625494 | -0.978579 |
| 6  | 3.946091  | -2.939020 | -1.111245 |
| 8  | 2.884812  | -2.733009 | -0.139735 |
| 6  | 4.695004  | -4.201007 | -0.757002 |
| 1  | 4.041763  | -5.070437 | -0.890918 |
| 1  | 5.563874  | -4.333206 | -1.413296 |
| 1  | 5.041218  | -4.198472 | 0.280251  |
| 6  | 3.277285  | -3.093753 | -2.464709 |
| 1  | 2.536812  | -3.899558 | -2.406052 |
| 1  | 2.749669  | -2.184403 | -2.774722 |
| 1  | 4.001947  | -3.354847 | -3.244158 |
| 6  | 5.403894  | -1.131855 | -2.259205 |
| 1  | 4.661903  | -0.924935 | -3.035250 |
| 1  | 5.954735  | -0.203300 | -2.066909 |
| 1  | 6.117992  | -1.866047 | -2.652247 |
| 6  | 5.816644  | -1.683308 | 0.124684  |
| 1  | 6.654916  | -2.338096 | -0.138274 |
| 1  | 6.216961  | -0.677036 | 0.293123  |
| 1  | 5.390557  | -2.035318 | 1.071219  |
| 1  | -0.468004 | 3.461637  | 2.300300  |
| 1  | 0.290345  | 1.970651  | 2.833073  |
| 1  | -2.406693 | 2.185286  | 1.389373  |
| 1  | -2.158899 | 1.773554  | 3.077037  |
| 6  | 0.153728  | -0.709876 | -2.163552 |
| 6  | 1.086266  | 0.182933  | -2.959178 |
| 1  | 1.204843  | -0.122450 | -4.016795 |
| 1  | 0.771166  | 1.237463  | -2.979699 |
| 1  | 2.088251  | 0.182192  | -2.510802 |
| 6  | -1.176822 | -0.911518 | -2.715348 |
| 6  | -1.759394 | 0.003223  | -3.626444 |
| 6  | -3.045932 | -0.134605 | -4.119073 |
| 6  | -3.834155 | -1.220031 | -3.755477 |
| 6  | -3.297212 | -2.161267 | -2.884768 |
| 6  | -2.016427 | -2.001594 | -2.387743 |
| 35 | -1.396534 | -3.347731 | -1.169530 |
| 1  | -3.883689 | -3.028958 | -2.588343 |
| 1  | -4.843203 | -1.342520 | -4.142126 |
| 1  | -3.433085 | 0.612840  | -4.810758 |

|   |           |           |           |
|---|-----------|-----------|-----------|
| 1 | -1.167689 | 0.858273  | -3.948884 |
| 1 | 0.624081  | -1.676218 | -1.938763 |

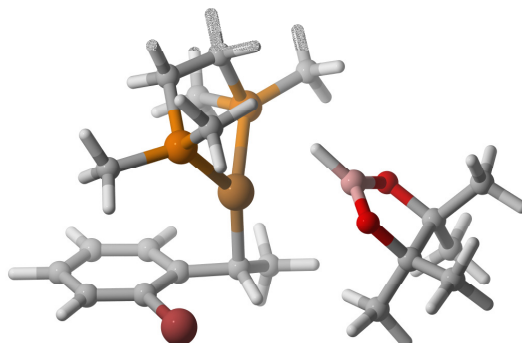

benzyl copper (dMepe) – Hbpin complex

RM06 energy: -4412.3061779

Sum of electronic and thermal Free Energies: -4411.833638

|    |           |           |           |
|----|-----------|-----------|-----------|
| 29 | 0.323582  | -0.528732 | -0.114799 |
| 15 | 0.119787  | -2.849204 | -0.527758 |
| 6  | 0.588065  | -3.584911 | 1.106498  |
| 6  | 1.766097  | -2.846128 | 1.728323  |
| 15 | 1.436607  | -1.026038 | 1.853339  |
| 6  | 3.097607  | -0.391877 | 2.279628  |
| 1  | 3.036377  | 0.667820  | 2.549281  |
| 1  | 3.528405  | -0.945669 | 3.123714  |
| 1  | 3.765471  | -0.483872 | 1.416058  |
| 6  | 0.568006  | -0.901896 | 3.459616  |
| 1  | -0.375016 | -1.457684 | 3.427705  |
| 1  | 1.182880  | -1.294758 | 4.279266  |
| 1  | 0.328494  | 0.146972  | 3.668458  |
| 1  | 2.665218  | -2.962490 | 1.105225  |
| 1  | 2.015761  | -3.249677 | 2.719882  |
| 1  | 0.804081  | -4.656538 | 0.988958  |
| 1  | -0.298653 | -3.508967 | 1.753187  |
| 6  | 1.393433  | -3.563682 | -1.636491 |
| 1  | 1.138599  | -3.341726 | -2.678874 |
| 1  | 2.373100  | -3.117521 | -1.433460 |
| 1  | 1.467074  | -4.652678 | -1.520161 |
| 6  | -1.346167 | -3.853400 | -0.966878 |

|    |           |           |           |
|----|-----------|-----------|-----------|
| 1  | -1.112307 | -4.925845 | -0.975288 |
| 1  | -2.154202 | -3.675703 | -0.249685 |
| 1  | -1.709817 | -3.561910 | -1.957996 |
| 5  | -2.543715 | -0.371322 | 0.745492  |
| 8  | -3.269015 | -0.721942 | -0.352444 |
| 6  | -4.372032 | 0.220503  | -0.433513 |
| 6  | -3.819858 | 1.445964  | 0.355751  |
| 8  | -2.904515 | 0.818252  | 1.294797  |
| 6  | -4.855922 | 2.224382  | 1.129590  |
| 1  | -4.377495 | 3.062837  | 1.648327  |
| 1  | -5.613924 | 2.640510  | 0.454508  |
| 1  | -5.361077 | 1.610578  | 1.880519  |
| 6  | -2.992316 | 2.383144  | -0.502743 |
| 1  | -2.443119 | 3.074121  | 0.146911  |
| 1  | -2.256408 | 1.840714  | -1.105872 |
| 1  | -3.620878 | 2.978628  | -1.174234 |
| 6  | -4.692610 | 0.487744  | -1.883832 |
| 1  | -3.821890 | 0.831521  | -2.448413 |
| 1  | -5.058675 | -0.430354 | -2.357135 |
| 1  | -5.482004 | 1.244265  | -1.971728 |
| 6  | -5.556415 | -0.442398 | 0.244554  |
| 1  | -6.462059 | 0.169507  | 0.171886  |
| 1  | -5.758873 | -1.400795 | -0.246192 |
| 1  | -5.361853 | -0.645093 | 1.303901  |
| 1  | -1.710571 | -1.073685 | 1.224965  |
| 6  | 0.390387  | 0.922156  | -1.527268 |
| 6  | -0.221207 | 0.458321  | -2.832296 |
| 1  | 0.069925  | 1.072831  | -3.704922 |
| 1  | 0.026957  | -0.581306 | -3.088905 |
| 1  | -1.317199 | 0.490181  | -2.773646 |
| 6  | 1.840098  | 0.994299  | -1.454998 |
| 6  | 2.669751  | 0.161069  | -2.250662 |
| 6  | 4.048986  | 0.151093  | -2.147059 |
| 6  | 4.704039  | 0.991731  | -1.252716 |
| 6  | 3.935050  | 1.837298  | -0.460697 |
| 6  | 2.556049  | 1.830365  | -0.563875 |
| 35 | 1.603430  | 3.006287  | 0.613933  |
| 1  | 4.415515  | 2.508723  | 0.248486  |
| 1  | 5.788310  | 0.999739  | -1.173484 |
| 1  | 4.624857  | -0.517558 | -2.785935 |
| 1  | 2.192552  | -0.508604 | -2.964179 |
| 1  | -0.076833 | 1.838790  | -1.155192 |

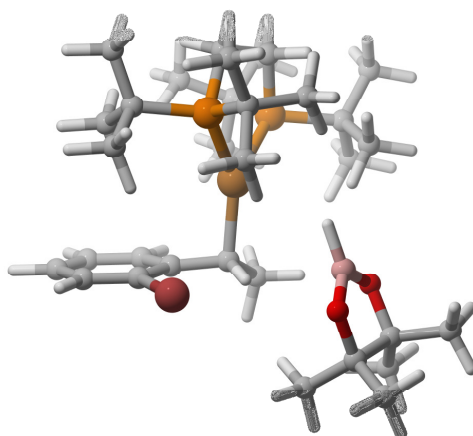

benzyl copper (dtBupe) – Hbpin complex

RM06 energy: -4883.7770041

Sum of electronic and thermal Free Energies: -4882.983967

|    |           |           |           |
|----|-----------|-----------|-----------|
| 29 | -0.595242 | 0.152397  | -0.233959 |
| 15 | -2.005350 | 2.074893  | -0.249412 |
| 6  | -3.046620 | 1.799466  | 1.271939  |
| 6  | -3.332695 | 0.337981  | 1.624555  |
| 15 | -1.884815 | -0.828919 | 1.479477  |
| 6  | -2.746857 | -2.467287 | 1.058860  |
| 6  | -1.781053 | -3.626842 | 1.270704  |
| 1  | -2.196736 | -4.533045 | 0.807116  |
| 1  | -0.803548 | -3.443188 | 0.809926  |
| 1  | -1.622223 | -3.853080 | 2.330366  |
| 6  | -4.037973 | -2.744936 | 1.821514  |
| 1  | -4.799906 | -1.973102 | 1.666862  |
| 1  | -4.467798 | -3.690840 | 1.460881  |
| 1  | -3.883142 | -2.853795 | 2.898544  |
| 6  | -3.069668 | -2.389115 | -0.432624 |
| 1  | -3.853984 | -1.655537 | -0.649338 |
| 1  | -2.186952 | -2.134718 | -1.033782 |
| 1  | -3.438036 | -3.364278 | -0.781480 |
| 6  | -1.135994 | -0.905075 | 3.217878  |
| 6  | 0.177846  | -1.682836 | 3.163868  |
| 1  | 0.036807  | -2.751498 | 2.980690  |
| 1  | 0.853139  | -1.303985 | 2.387231  |
| 1  | 0.693284  | -1.584454 | 4.130188  |
| 6  | -0.798041 | 0.533238  | 3.600672  |
| 1  | -1.688107 | 1.154379  | 3.754136  |

|   |           |           |           |
|---|-----------|-----------|-----------|
| 1 | -0.240985 | 0.532691  | 4.547867  |
| 1 | -0.158334 | 1.014508  | 2.851032  |
| 6 | -2.039211 | -1.498358 | 4.288473  |
| 1 | -2.204418 | -2.572013 | 4.151866  |
| 1 | -1.566392 | -1.371502 | 5.273479  |
| 1 | -3.017519 | -1.005195 | 4.338369  |
| 1 | -4.091235 | -0.057887 | 0.941324  |
| 1 | -3.780521 | 0.283893  | 2.626497  |
| 1 | -3.993566 | 2.351841  | 1.197850  |
| 1 | -2.492538 | 2.268085  | 2.092151  |
| 6 | -3.255362 | 2.284491  | -1.662552 |
| 6 | -2.507735 | 2.265034  | -2.993605 |
| 1 | -3.235595 | 2.279147  | -3.817274 |
| 1 | -1.842708 | 3.122070  | -3.133442 |
| 1 | -1.909263 | 1.352003  | -3.100456 |
| 6 | -4.150366 | 1.049844  | -1.638950 |
| 1 | -4.819626 | 1.072236  | -2.510323 |
| 1 | -3.564440 | 0.125182  | -1.706019 |
| 1 | -4.785496 | 1.001132  | -0.747455 |
| 6 | -4.133043 | 3.524588  | -1.582644 |
| 1 | -4.897710 | 3.476213  | -2.371768 |
| 1 | -4.664860 | 3.607171  | -0.626684 |
| 1 | -3.569558 | 4.449277  | -1.742646 |
| 6 | -1.182174 | 3.742204  | 0.136147  |
| 6 | -2.085586 | 4.781843  | 0.789197  |
| 1 | -2.910660 | 5.104375  | 0.147462  |
| 1 | -2.512550 | 4.432448  | 1.736163  |
| 1 | -1.491149 | 5.677469  | 1.022094  |
| 6 | -0.036649 | 3.423087  | 1.093073  |
| 1 | -0.385237 | 3.020538  | 2.051408  |
| 1 | 0.671832  | 2.708644  | 0.657546  |
| 1 | 0.519651  | 4.344984  | 1.315750  |
| 6 | -0.571920 | 4.319112  | -1.135571 |
| 1 | -1.325530 | 4.692995  | -1.836083 |
| 1 | 0.072197  | 5.170646  | -0.873847 |
| 1 | 0.055762  | 3.585807  | -1.657951 |
| 5 | 2.930956  | 0.885393  | 1.120614  |
| 1 | 1.856572  | 0.744961  | 1.603811  |
| 8 | 3.256147  | 1.960854  | 0.352664  |
| 6 | 4.694883  | 1.922127  | 0.160114  |
| 6 | 5.034948  | 0.422271  | 0.436907  |
| 8 | 3.952726  | 0.012142  | 1.315983  |
| 6 | 6.347855  | 0.193061  | 1.148629  |
| 1 | 6.495440  | -0.879800 | 1.315608  |
| 1 | 7.189057  | 0.554996  | 0.544184  |
| 1 | 6.381133  | 0.692930  | 2.121224  |



|    |           |           |           |
|----|-----------|-----------|-----------|
| 6  | 4.955054  | -0.451884 | -0.801330 |
| 1  | 5.016289  | -1.503614 | -0.501512 |
| 1  | 4.011240  | -0.316899 | -1.343403 |
| 1  | 5.783586  | -0.248780 | -1.489619 |
| 6  | 5.014236  | 2.398308  | -1.236891 |
| 1  | 4.477252  | 1.830907  | -2.003007 |
| 1  | 4.732452  | 3.452456  | -1.341534 |
| 1  | 6.090470  | 2.319896  | -1.437089 |
| 6  | 5.287238  | 2.873405  | 1.183707  |
| 1  | 6.374356  | 2.962004  | 1.080055  |
| 1  | 4.852548  | 3.868953  | 1.038741  |
| 1  | 5.062433  | 2.559029  | 2.209535  |
| 6  | 0.965588  | -0.271732 | -1.483339 |
| 6  | 1.311475  | 0.901588  | -2.381400 |
| 1  | 2.002254  | 0.635736  | -3.205367 |
| 1  | 0.437546  | 1.370278  | -2.855926 |
| 1  | 1.803067  | 1.689562  | -1.796225 |
| 6  | 0.443189  | -1.463137 | -2.135663 |
| 6  | -0.365747 | -1.377843 | -3.296933 |
| 6  | -0.950930 | -2.480033 | -3.892407 |
| 6  | -0.756947 | -3.756337 | -3.373557 |
| 6  | 0.062225  | -3.897145 | -2.260235 |
| 6  | 0.649268  | -2.785772 | -1.679711 |
| 35 | 1.820333  | -3.108525 | -0.194183 |
| 1  | 0.259222  | -4.884644 | -1.846618 |
| 1  | -1.213918 | -4.629275 | -3.833086 |
| 1  | -1.566197 | -2.340841 | -4.780280 |
| 1  | -0.535969 | -0.393140 | -3.730117 |
| 1  | 1.810502  | -0.525913 | -0.832592 |

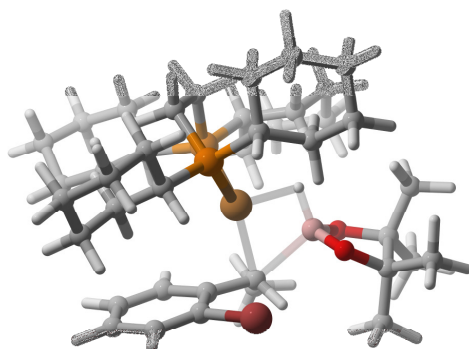

Hydroboration for benzyl copper (dCype) – TS (entry 5)

RM06 energy: -5193.2978242

Sum of electronic and thermal Free Energies: -5192.352459

Imaginary frequency: -100.2408

|    |           |           |           |
|----|-----------|-----------|-----------|
| 6  | -1.860942 | 0.873112  | 2.194737  |
| 6  | -0.732831 | 1.898639  | 2.259853  |
| 15 | 0.035485  | 2.271108  | 0.610304  |
| 6  | -1.006075 | 3.614178  | -0.141394 |
| 1  | -0.482512 | 3.828855  | -1.089683 |
| 6  | -1.120071 | 4.919157  | 0.641910  |
| 6  | -1.877224 | 5.964773  | -0.170606 |
| 6  | -3.246282 | 5.462882  | -0.606942 |
| 6  | -3.141736 | 4.137028  | -1.347695 |
| 6  | -2.399180 | 3.106482  | -0.510508 |
| 1  | -2.335244 | 2.146951  | -1.040833 |
| 1  | -2.973776 | 2.920188  | 0.410693  |
| 1  | -2.602643 | 4.283982  | -2.298636 |
| 1  | -4.140021 | 3.762924  | -1.612360 |
| 1  | -3.748690 | 6.215149  | -1.229003 |
| 1  | -3.880674 | 5.324218  | 0.283623  |
| 1  | -1.282222 | 6.219318  | -1.062668 |
| 1  | -1.975904 | 6.892799  | 0.408136  |
| 1  | -1.655714 | 4.732839  | 1.586621  |
| 1  | -0.131933 | 5.310567  | 0.916396  |
| 6  | 1.599502  | 3.146930  | 1.102669  |
| 1  | 1.331358  | 3.898278  | 1.866491  |
| 6  | 2.613298  | 2.174346  | 1.709110  |
| 6  | 3.888393  | 2.897644  | 2.122848  |
| 6  | 4.512775  | 3.627148  | 0.943383  |
| 6  | 3.514431  | 4.575708  | 0.299476  |
| 6  | 2.232322  | 3.854766  | -0.095584 |
| 1  | 1.535378  | 4.569525  | -0.552548 |
| 1  | 2.458933  | 3.100345  | -0.868193 |
| 1  | 3.268751  | 5.384613  | 1.007068  |
| 1  | 3.956255  | 5.060480  | -0.581274 |
| 1  | 5.413388  | 4.171553  | 1.257045  |
| 1  | 4.839848  | 2.888362  | 0.194406  |
| 1  | 3.659498  | 3.622378  | 2.921096  |
| 1  | 4.601216  | 2.180253  | 2.552735  |
| 1  | 2.188814  | 1.643903  | 2.573072  |
| 1  | 2.858789  | 1.408307  | 0.958264  |
| 29 | 0.161733  | 0.115675  | -0.277744 |
| 15 | -1.385783 | -0.691920 | 1.310089  |
| 6  | -3.033717 | -1.454462 | 0.888971  |

|   |           |           |           |
|---|-----------|-----------|-----------|
| 6 | -3.920759 | -1.849543 | 2.067351  |
| 6 | -5.198458 | -2.531404 | 1.589340  |
| 6 | -5.965720 | -1.663096 | 0.604324  |
| 6 | -5.081228 | -1.267000 | -0.566795 |
| 6 | -3.813949 | -0.573984 | -0.085286 |
| 1 | -4.103121 | 0.363701  | 0.415863  |
| 1 | -3.185132 | -0.293395 | -0.939153 |
| 1 | -4.809480 | -2.168976 | -1.139227 |
| 1 | -5.623015 | -0.611912 | -1.262671 |
| 1 | -6.864746 | -2.185403 | 0.251730  |
| 1 | -6.316581 | -0.753446 | 1.118505  |
| 1 | -4.935189 | -3.484253 | 1.102408  |
| 1 | -5.828488 | -2.789460 | 2.451160  |
| 1 | -3.387341 | -2.515944 | 2.756719  |
| 1 | -4.188152 | -0.947885 | 2.642378  |
| 1 | -2.745254 | -2.374586 | 0.347712  |
| 6 | -0.724598 | -1.857047 | 2.626645  |
| 6 | -1.093649 | -1.504772 | 4.066616  |
| 6 | -0.617648 | -2.579991 | 5.035566  |
| 6 | 0.881381  | -2.806723 | 4.920505  |
| 6 | 1.269734  | -3.132629 | 3.487396  |
| 6 | 0.784876  | -2.066411 | 2.514891  |
| 1 | 1.065842  | -2.334734 | 1.489520  |
| 1 | 1.298841  | -1.113834 | 2.730248  |
| 1 | 2.358057  | -3.251661 | 3.398144  |
| 1 | 0.829456  | -4.102444 | 3.203576  |
| 1 | 1.409969  | -1.894224 | 5.240886  |
| 1 | 1.203974  | -3.605815 | 5.601104  |
| 1 | -0.889368 | -2.303832 | 6.063319  |
| 1 | -1.148552 | -3.521267 | 4.817269  |
| 1 | -0.617413 | -0.547622 | 4.335724  |
| 1 | -2.173642 | -1.354317 | 4.181423  |
| 1 | -1.203642 | -2.818750 | 2.369115  |
| 5 | 2.154788  | -0.791018 | -0.616944 |
| 1 | 1.667696  | -0.416651 | 0.470102  |
| 8 | 3.363414  | -0.107445 | -0.929093 |
| 6 | 4.426426  | -1.034229 | -0.718899 |
| 6 | 3.750617  | -2.396499 | -1.053516 |
| 8 | 2.408443  | -2.185389 | -0.620036 |
| 6 | 4.321811  | -3.583251 | -0.305748 |
| 1 | 3.807889  | -4.500973 | -0.616127 |
| 1 | 5.390534  | -3.714195 | -0.519499 |
| 1 | 4.194114  | -3.482503 | 0.776482  |
| 6 | 3.753690  | -2.703513 | -2.545518 |
| 1 | 3.060554  | -3.530469 | -2.738614 |
| 1 | 3.427974  | -1.849907 | -3.149603 |

|    |           |           |           |
|----|-----------|-----------|-----------|
| 1  | 4.746325  | -3.008468 | -2.899554 |
| 6  | 5.592336  | -0.665741 | -1.609880 |
| 1  | 5.292453  | -0.572741 | -2.658118 |
| 1  | 6.010474  | 0.298486  | -1.296978 |
| 1  | 6.394515  | -1.411811 | -1.544221 |
| 6  | 4.854147  | -0.936915 | 0.740778  |
| 1  | 5.721807  | -1.568305 | 0.965459  |
| 1  | 5.129911  | 0.101916  | 0.962442  |
| 1  | 4.040713  | -1.214919 | 1.422530  |
| 1  | -1.081327 | 2.822873  | 2.741312  |
| 1  | 0.080896  | 1.513985  | 2.890773  |
| 1  | -2.708857 | 1.284104  | 1.636087  |
| 1  | -2.236966 | 0.661366  | 3.201824  |
| 6  | 0.942312  | -0.342807 | -2.270770 |
| 6  | 1.642656  | 0.805196  | -2.986223 |
| 1  | 1.382080  | 0.845740  | -4.056121 |
| 1  | 1.402007  | 1.788417  | -2.560352 |
| 1  | 2.726469  | 0.701373  | -2.908017 |
| 6  | -0.512337 | -0.405926 | -2.622461 |
| 6  | -1.211221 | 0.745574  | -3.047970 |
| 6  | -2.518755 | 0.713082  | -3.502173 |
| 6  | -3.209908 | -0.488619 | -3.574855 |
| 6  | -2.570223 | -1.645861 | -3.154327 |
| 6  | -1.268748 | -1.595579 | -2.679631 |
| 35 | -0.513591 | -3.255681 | -2.111573 |
| 1  | -3.087844 | -2.602066 | -3.193518 |
| 1  | -4.231531 | -0.531730 | -3.945072 |
| 1  | -2.996688 | 1.641753  | -3.811767 |
| 1  | -0.697073 | 1.704144  | -3.030014 |
| 1  | 1.372346  | -1.294849 | -2.601678 |

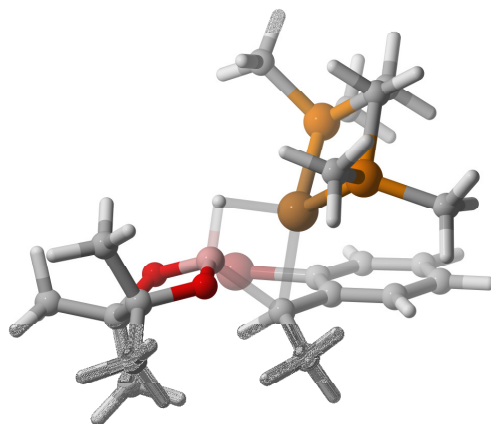

hydroboration of benzyl copper (dMepe) – TS (entry 6)

RM06 energy: -4412.2883274

Sum of electronic and thermal Free Energies: -4411.815599

Imaginary frequency: -105.5431

|    |           |           |           |
|----|-----------|-----------|-----------|
| 29 | 0.496483  | -0.585916 | 0.117355  |
| 15 | 1.288127  | -2.690624 | -0.471593 |
| 6  | 2.508625  | -3.012378 | 0.881564  |
| 6  | 3.337050  | -1.771225 | 1.190311  |
| 15 | 2.260754  | -0.328029 | 1.616501  |
| 6  | 3.504493  | 0.985870  | 1.885616  |
| 1  | 3.011888  | 1.903827  | 2.223150  |
| 1  | 4.238586  | 0.682740  | 2.643125  |
| 1  | 4.028740  | 1.206531  | 0.950084  |
| 6  | 1.751416  | -0.713336 | 3.331475  |
| 1  | 1.053633  | -1.557393 | 3.338890  |
| 1  | 2.608646  | -0.949566 | 3.974781  |
| 1  | 1.221569  | 0.149892  | 3.749989  |
| 1  | 3.926740  | -1.470344 | 0.310549  |
| 1  | 4.050573  | -1.961845 | 2.004466  |
| 1  | 3.149498  | -3.863720 | 0.612010  |
| 1  | 1.932938  | -3.319663 | 1.766282  |
| 6  | 2.292175  | -3.029716 | -1.964920 |
| 1  | 1.677088  | -2.938722 | -2.866416 |
| 1  | 3.116559  | -2.312819 | -2.041722 |
| 1  | 2.711453  | -4.043213 | -1.930205 |
| 6  | 0.215608  | -4.166631 | -0.397675 |
| 1  | 0.797866  | -5.096905 | -0.390156 |
| 1  | -0.407125 | -4.125648 | 0.502617  |
| 1  | -0.452539 | -4.174930 | -1.265890 |
| 5  | -1.667378 | -0.275018 | 0.224212  |
| 8  | -2.479640 | -1.253029 | -0.415563 |
| 6  | -3.816998 | -1.056886 | 0.038091  |
| 6  | -3.844820 | 0.464906  | 0.373296  |
| 8  | -2.511390 | 0.707303  | 0.808408  |
| 6  | -4.798169 | 0.845724  | 1.487748  |
| 1  | -4.768794 | 1.930536  | 1.647004  |
| 1  | -5.832630 | 0.575494  | 1.238910  |
| 1  | -4.533036 | 0.366826  | 2.434531  |
| 6  | -4.141000 | 1.340911  | -0.838707 |
| 1  | -3.902548 | 2.381056  | -0.584406 |
| 1  | -3.541326 | 1.070869  | -1.714072 |
| 1  | -5.198729 | 1.302692  | -1.127469 |

|    |           |           |           |
|----|-----------|-----------|-----------|
| 6  | -4.783505 | -1.484787 | -1.045063 |
| 1  | -4.583556 | -0.984176 | -1.996898 |
| 1  | -4.700022 | -2.565204 | -1.214791 |
| 1  | -5.821739 | -1.274484 | -0.757399 |
| 6  | -4.025631 | -1.929986 | 1.269444  |
| 1  | -5.056788 | -1.894098 | 1.640971  |
| 1  | -3.800163 | -2.970595 | 1.007039  |
| 1  | -3.356358 | -1.642922 | 2.088633  |
| 1  | -0.911745 | -0.753420 | 1.135692  |
| 6  | -0.649082 | 0.626520  | -1.320517 |
| 6  | -1.075940 | -0.086387 | -2.593476 |
| 1  | -0.844623 | 0.503152  | -3.494899 |
| 1  | -0.601254 | -1.069484 | -2.717319 |
| 1  | -2.151165 | -0.277044 | -2.592650 |
| 6  | 0.729935  | 1.200118  | -1.426609 |
| 6  | 1.688483  | 0.656414  | -2.309481 |
| 6  | 2.969517  | 1.166448  | -2.433812 |
| 6  | 3.356362  | 2.282200  | -1.702537 |
| 6  | 2.435180  | 2.870131  | -0.845887 |
| 6  | 1.164205  | 2.336918  | -0.714132 |
| 35 | -0.004641 | 3.189287  | 0.531973  |
| 1  | 2.710924  | 3.748233  | -0.266071 |
| 1  | 4.354547  | 2.702190  | -1.801904 |
| 1  | 3.667255  | 0.694905  | -3.124108 |
| 1  | 1.410092  | -0.207333 | -2.908367 |
| 1  | -1.315520 | 1.472821  | -1.122111 |

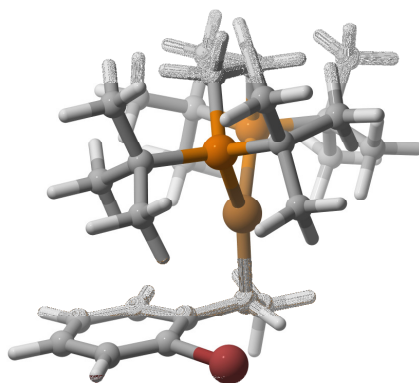

Hydroboration of benzyl copper (dtBupe) – TS (entry 7)

RM06 energy: -4883.7540547

Sum of electronic and thermal Free Energies: -4882.956181

Imaginary frequency: -118.9103

|    |           |           |           |
|----|-----------|-----------|-----------|
| 29 | -0.333110 | 0.129105  | -0.169449 |
| 15 | -2.460375 | 1.240908  | -0.239896 |
| 6  | -3.189326 | 0.560887  | 1.337337  |
| 6  | -2.848145 | -0.879603 | 1.718836  |
| 15 | -1.069391 | -1.392319 | 1.507543  |
| 6  | -1.246079 | -3.263291 | 1.225259  |
| 6  | 0.125431  | -3.920107 | 1.339937  |
| 1  | 0.068572  | -4.951336 | 0.962854  |
| 1  | 0.885958  | -3.398085 | 0.746931  |
| 1  | 0.480406  | -3.974434 | 2.374619  |
| 6  | -2.234716 | -3.987569 | 2.133240  |
| 1  | -3.245833 | -3.569407 | 2.076670  |
| 1  | -2.308706 | -5.034996 | 1.805835  |
| 1  | -1.933452 | -4.002716 | 3.182926  |
| 6  | -1.727408 | -3.421311 | -0.214846 |
| 1  | -2.754330 | -3.066066 | -0.358252 |
| 1  | -1.081245 | -2.895716 | -0.923422 |
| 1  | -1.718868 | -4.486625 | -0.485335 |
| 6  | -0.266344 | -1.072758 | 3.201849  |
| 6  | 1.250264  | -1.187479 | 3.060458  |
| 1  | 1.580530  | -2.198643 | 2.804006  |
| 1  | 1.657685  | -0.506491 | 2.303521  |
| 1  | 1.718572  | -0.928666 | 4.021619  |
| 6  | -0.589353 | 0.365795  | 3.599427  |
| 1  | -1.656415 | 0.520599  | 3.797687  |
| 1  | -0.053321 | 0.605375  | 4.528428  |
| 1  | -0.262025 | 1.087811  | 2.843516  |
| 6  | -0.747221 | -1.987411 | 4.319997  |
| 1  | -0.404624 | -3.019339 | 4.197596  |
| 1  | -0.338704 | -1.629113 | 5.276129  |
| 1  | -1.839298 | -1.995255 | 4.422137  |
| 1  | -3.429653 | -1.570074 | 1.099253  |
| 1  | -3.176385 | -1.063608 | 2.751260  |
| 1  | -4.280841 | 0.680914  | 1.326469  |
| 1  | -2.828834 | 1.234739  | 2.121834  |
| 6  | -3.742147 | 0.816770  | -1.580893 |
| 6  | -3.202167 | 1.204653  | -2.955194 |
| 1  | -3.898580 | 0.847709  | -3.727226 |
| 1  | -3.093228 | 2.283054  | -3.094862 |
| 1  | -2.231032 | 0.741782  | -3.158582 |
| 6  | -3.892364 | -0.702227 | -1.567506 |
| 1  | -4.511699 | -1.011493 | -2.420995 |

|   |           |           |           |
|---|-----------|-----------|-----------|
| 1 | -2.927240 | -1.213573 | -1.665952 |
| 1 | -4.390609 | -1.067600 | -0.662855 |
| 6 | -5.116365 | 1.441555  | -1.392536 |
| 1 | -5.812396 | 1.003931  | -2.122830 |
| 1 | -5.539713 | 1.255233  | -0.398561 |
| 1 | -5.112309 | 2.521963  | -1.568212 |
| 6 | -2.524077 | 3.109710  | 0.130853  |
| 6 | -3.790323 | 3.580653  | 0.839430  |
| 1 | -4.703167 | 3.417989  | 0.261309  |
| 1 | -3.924327 | 3.111730  | 1.820480  |
| 1 | -3.712858 | 4.663146  | 1.016818  |
| 6 | -1.329532 | 3.424518  | 1.028934  |
| 1 | -1.351584 | 2.879396  | 1.980599  |
| 1 | -0.376200 | 3.216244  | 0.533508  |
| 1 | -1.349414 | 4.495652  | 1.277610  |
| 6 | -2.344814 | 3.900199  | -1.159751 |
| 1 | -3.237154 | 3.879967  | -1.794685 |
| 1 | -2.151939 | 4.953427  | -0.912082 |
| 1 | -1.489462 | 3.545735  | -1.749862 |
| 5 | 1.542770  | 1.339325  | 0.085582  |
| 1 | 0.607636  | 1.178177  | 0.895079  |
| 8 | 1.659316  | 2.674107  | -0.396047 |
| 6 | 2.805981  | 3.249709  | 0.227181  |
| 6 | 3.722356  | 2.009987  | 0.444881  |
| 8 | 2.776949  | 0.968515  | 0.676864  |
| 6 | 4.639711  | 2.105264  | 1.645927  |
| 1 | 5.251793  | 1.198005  | 1.717076  |
| 1 | 5.322889  | 2.960288  | 1.562037  |
| 1 | 4.078506  | 2.199741  | 2.580409  |
| 6 | 4.554912  | 1.673640  | -0.785530 |
| 1 | 4.979143  | 0.670347  | -0.663025 |
| 1 | 3.962453  | 1.672154  | -1.707049 |
| 1 | 5.385820  | 2.377093  | -0.920268 |
| 6 | 3.380503  | 4.314722  | -0.681630 |
| 1 | 3.587868  | 3.928739  | -1.684288 |
| 1 | 2.665501  | 5.139784  | -0.785261 |
| 1 | 4.309779  | 4.731274  | -0.272001 |
| 6 | 2.358629  | 3.890781  | 1.535248  |
| 1 | 3.176595  | 4.411916  | 2.046440  |
| 1 | 1.578401  | 4.630615  | 1.320044  |
| 1 | 1.934236  | 3.153499  | 2.227984  |
| 6 | 1.297125  | 0.262654  | -1.691341 |
| 6 | 0.959831  | 1.262208  | -2.793279 |
| 1 | 1.330523  | 0.932926  | -3.777772 |
| 1 | -0.115990 | 1.446171  | -2.905202 |
| 1 | 1.412704  | 2.231863  | -2.574561 |



|    |           |           |           |
|----|-----------|-----------|-----------|
| 6  | 0.945394  | -1.139359 | -2.083948 |
| 6  | -0.104896 | -1.397374 | -2.990195 |
| 6  | -0.396825 | -2.657817 | -3.479979 |
| 6  | 0.359478  | -3.755106 | -3.089870 |
| 6  | 1.400616  | -3.554981 | -2.197091 |
| 6  | 1.678378  | -2.283281 | -1.713561 |
| 35 | 3.169283  | -2.145458 | -0.524830 |
| 1  | 2.015312  | -4.393538 | -1.876484 |
| 1  | 0.148154  | -4.751404 | -3.470838 |
| 1  | -1.220330 | -2.779198 | -4.181898 |
| 1  | -0.702955 | -0.559689 | -3.336263 |
| 1  | 2.384450  | 0.254439  | -1.559967 |

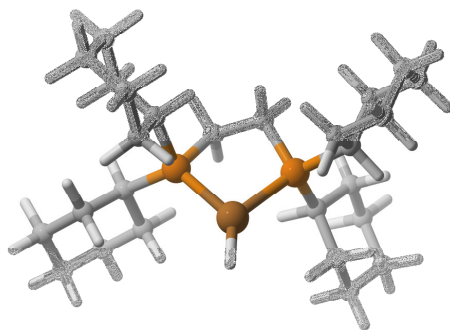

Copper-Hydride (dCype) (entry 8)

RM06 energy: -1898.6704047

Sum of electronic and thermal Free Energies: -1898.030668

|    |           |           |           |
|----|-----------|-----------|-----------|
| 6  | -0.549247 | 0.274726  | 1.684626  |
| 15 | -1.595267 | 0.073050  | 0.163103  |
| 6  | -2.184727 | -1.678993 | 0.372747  |
| 1  | -1.254798 | -2.202978 | 0.661950  |
| 6  | -3.213131 | -1.913122 | 1.474342  |
| 6  | -3.534884 | -3.396212 | 1.616871  |
| 6  | -3.998915 | -3.987561 | 0.293863  |
| 6  | -2.962671 | -3.766165 | -0.797849 |
| 6  | -2.629619 | -2.289343 | -0.956510 |
| 1  | -3.513959 | -1.755355 | -1.336196 |
| 1  | -1.842129 | -2.144981 | -1.710353 |
| 1  | -2.043663 | -4.318510 | -0.542181 |
| 1  | -3.314162 | -4.177380 | -1.753184 |
| 1  | -4.946454 | -3.509275 | -0.003418 |
| 1  | -4.215678 | -5.058020 | 0.406945  |

|    |           |           |           |
|----|-----------|-----------|-----------|
| 1  | -2.635187 | -3.932697 | 1.958966  |
| 1  | -4.297222 | -3.542186 | 2.393850  |
| 1  | -2.857347 | -1.509847 | 2.432550  |
| 1  | -4.141530 | -1.372633 | 1.234704  |
| 6  | -3.010454 | 1.230786  | 0.479182  |
| 1  | -3.403317 | 1.045707  | 1.493995  |
| 29 | -0.105853 | 0.148796  | -1.626981 |
| 1  | -0.211540 | 0.262910  | -3.216296 |
| 15 | 1.622038  | 0.020853  | -0.065553 |
| 6  | 0.804506  | -0.415184 | 1.541278  |
| 1  | 1.443194  | -0.182874 | 2.402216  |
| 1  | 0.680981  | -1.506950 | 1.538971  |
| 6  | 2.268945  | 1.737428  | 0.210027  |
| 1  | 1.353174  | 2.302416  | 0.469253  |
| 6  | 3.288579  | 1.932694  | 1.326581  |
| 6  | 3.674254  | 3.400705  | 1.466899  |
| 6  | 4.204627  | 3.957775  | 0.154329  |
| 6  | 3.195763  | 3.764370  | -0.967327 |
| 6  | 2.793504  | 2.303155  | -1.110325 |
| 1  | 3.668566  | 1.715043  | -1.433770 |
| 1  | 2.034283  | 2.184200  | -1.895617 |
| 1  | 2.296719  | 4.364726  | -0.754368 |
| 1  | 3.597861  | 4.138333  | -1.918027 |
| 1  | 5.140882  | 3.438159  | -0.106306 |
| 1  | 4.460568  | 5.020002  | 0.262564  |
| 1  | 4.418681  | 3.519143  | 2.265557  |
| 1  | 2.789692  | 3.980060  | 1.777158  |
| 1  | 4.194067  | 1.350145  | 1.094256  |
| 1  | 2.905827  | 1.550432  | 2.282665  |
| 6  | 3.064887  | -1.142519 | -0.197989 |
| 1  | 3.820119  | -0.586671 | -0.780977 |
| 6  | 3.694780  | -1.603146 | 1.116254  |
| 6  | 4.847623  | -2.568512 | 0.869160  |
| 6  | 4.399653  | -3.767988 | 0.048563  |
| 6  | 3.770234  | -3.324091 | -1.262686 |
| 6  | 2.625278  | -2.348551 | -1.033785 |
| 1  | 1.798845  | -2.865776 | -0.513163 |
| 1  | 2.213366  | -2.005586 | -1.992263 |
| 1  | 4.536508  | -2.833817 | -1.884499 |
| 1  | 3.416621  | -4.191006 | -1.835990 |
| 1  | 3.662169  | -4.347184 | 0.627778  |
| 1  | 5.244398  | -4.443428 | -0.139761 |
| 1  | 5.654917  | -2.041967 | 0.335069  |
| 1  | 5.273046  | -2.894420 | 1.827733  |
| 1  | 4.041157  | -0.747448 | 1.708567  |
| 1  | 2.932564  | -2.113258 | 1.725853  |

|   |           |           |           |
|---|-----------|-----------|-----------|
| 1 | -1.080320 | -0.100411 | 2.570211  |
| 1 | -0.401713 | 1.349679  | 1.848325  |
| 6 | -5.246862 | 2.043510  | -0.364658 |
| 6 | -4.720534 | 3.467593  | -0.437214 |
| 6 | -3.613880 | 3.684386  | 0.581983  |
| 6 | -2.492675 | 2.670345  | 0.402215  |
| 1 | -2.018488 | 2.822258  | -0.582664 |
| 1 | -1.710481 | 2.846093  | 1.152043  |
| 1 | -4.030177 | 3.589338  | 1.597882  |
| 1 | -3.210430 | 4.702708  | 0.506184  |
| 1 | -4.324026 | 3.656481  | -1.447658 |
| 1 | -5.534064 | 4.188693  | -0.282906 |
| 6 | -4.129098 | 1.024700  | -0.542176 |
| 1 | -4.541062 | 0.010262  | -0.470862 |
| 1 | -3.704604 | 1.116376  | -1.556241 |
| 1 | -5.729597 | 1.883656  | 0.613261  |
| 1 | -6.023695 | 1.879488  | -1.123021 |

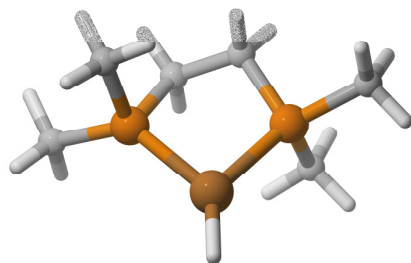

Copper-hydride (dMepe) (entry 9)

RM06 energy: -1117.6625474

Sum of electronic and thermal Free Energies: -1117.491407

|    |           |           |           |
|----|-----------|-----------|-----------|
| 6  | -0.665206 | -1.704445 | 0.370213  |
| 6  | 0.665305  | -1.704618 | -0.369319 |
| 15 | 1.602976  | -0.136381 | -0.068587 |
| 6  | 2.173506  | -0.386729 | 1.653772  |
| 1  | 2.610322  | -1.383458 | 1.796475  |
| 1  | 2.928226  | 0.367331  | 1.900115  |
| 1  | 1.340600  | -0.256174 | 2.352550  |
| 6  | 3.137168  | -0.450309 | -1.014752 |
| 1  | 3.591888  | -1.406784 | -0.727811 |
| 1  | 2.921676  | -0.468999 | -2.087756 |

|    |           |           |           |
|----|-----------|-----------|-----------|
| 1  | 3.857847  | 0.352372  | -0.830347 |
| 29 | -0.000159 | 1.576557  | -0.000142 |
| 15 | -1.602939 | -0.136434 | 0.068541  |
| 6  | -3.137317 | -0.450002 | 1.014499  |
| 1  | -3.857914 | 0.352673  | 0.829751  |
| 1  | -3.592036 | -1.406524 | 0.727720  |
| 1  | -2.922022 | -0.468418 | 2.087547  |
| 6  | -2.173049 | -0.387594 | -1.653839 |
| 1  | -2.927490 | 0.366527  | -1.900839 |
| 1  | -1.339902 | -0.257680 | -2.352449 |
| 1  | -2.610086 | -1.384290 | -1.796100 |
| 1  | 0.000297  | 3.166011  | 0.000168  |
| 1  | 1.283876  | -2.565160 | -0.076931 |
| 1  | 0.503472  | -1.784406 | -1.453466 |
| 1  | -0.503400 | -1.783583 | 1.454414  |
| 1  | -1.283732 | -2.565183 | 0.078310  |

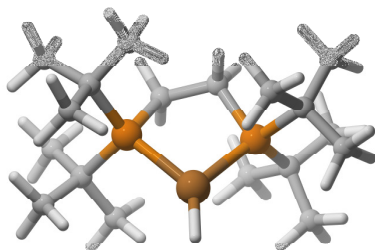

Copper hydride (dtBupe) (entry 10)

RM06 energy: -1589.1361155

Sum of electronic and thermal Free Energies: -1588.636059

|    |           |           |           |
|----|-----------|-----------|-----------|
| 6  | 0.304676  | -0.703869 | -1.628812 |
| 6  | -0.304676 | 0.703869  | -1.628812 |
| 15 | 0.000000  | 1.668386  | -0.059676 |
| 6  | 1.515591  | 2.741334  | -0.423903 |
| 6  | 1.289053  | 3.873995  | -1.414165 |
| 1  | 0.626182  | 4.649883  | -1.018446 |
| 1  | 2.251108  | 4.358277  | -1.637222 |
| 1  | 0.876184  | 3.523552  | -2.368623 |
| 6  | 2.030987  | 3.302053  | 0.899819  |
| 1  | 2.203081  | 2.506974  | 1.636675  |
| 1  | 2.988561  | 3.815247  | 0.731888  |

|    |           |           |           |
|----|-----------|-----------|-----------|
| 1  | 1.348856  | 4.028782  | 1.350574  |
| 6  | 2.593049  | 1.814221  | -0.978421 |
| 1  | 2.808502  | 0.984899  | -0.294834 |
| 1  | 2.336641  | 1.401980  | -1.960929 |
| 1  | 3.525822  | 2.381771  | -1.100505 |
| 6  | -1.557725 | 2.726305  | 0.106748  |
| 6  | -2.022772 | 3.435621  | -1.158286 |
| 1  | -2.144166 | 2.751404  | -2.005766 |
| 1  | -3.006638 | 3.892009  | -0.975427 |
| 1  | -1.351862 | 4.240744  | -1.469108 |
| 6  | -2.655014 | 1.758160  | 0.550936  |
| 1  | -2.347748 | 1.148862  | 1.413255  |
| 1  | -3.547271 | 2.327367  | 0.846779  |
| 1  | -2.962524 | 1.082884  | -0.254373 |
| 6  | -1.350512 | 3.742371  | 1.223910  |
| 1  | -1.003257 | 3.266751  | 2.150216  |
| 1  | -0.637157 | 4.526333  | 0.950260  |
| 1  | -2.305823 | 4.238309  | 1.445681  |
| 29 | 0.000000  | 0.000000  | 1.588633  |
| 15 | 0.000000  | -1.668386 | -0.059676 |
| 6  | 1.557725  | -2.726305 | 0.106748  |
| 6  | 1.350512  | -3.742371 | 1.223910  |
| 1  | 2.305823  | -4.238309 | 1.445681  |
| 1  | 1.003257  | -3.266751 | 2.150216  |
| 1  | 0.637157  | -4.526333 | 0.950260  |
| 6  | 2.022772  | -3.435621 | -1.158286 |
| 1  | 3.006638  | -3.892009 | -0.975427 |
| 1  | 1.351862  | -4.240744 | -1.469108 |
| 1  | 2.144166  | -2.751404 | -2.005766 |
| 6  | 2.655014  | -1.758160 | 0.550936  |
| 1  | 3.547271  | -2.327367 | 0.846779  |
| 1  | 2.962524  | -1.082884 | -0.254373 |
| 1  | 2.347748  | -1.148862 | 1.413255  |
| 6  | -1.515591 | -2.741334 | -0.423903 |
| 6  | -2.030987 | -3.302053 | 0.899819  |
| 1  | -2.203081 | -2.506974 | 1.636675  |
| 1  | -2.988561 | -3.815247 | 0.731888  |
| 1  | -1.348856 | -4.028782 | 1.350574  |
| 6  | -2.593049 | -1.814221 | -0.978421 |
| 1  | -2.808502 | -0.984899 | -0.294834 |
| 1  | -2.336641 | -1.401980 | -1.960929 |
| 1  | -3.525822 | -2.381771 | -1.100505 |
| 6  | -1.289053 | -3.873995 | -1.414165 |
| 1  | -0.626182 | -4.649883 | -1.018446 |
| 1  | -2.251108 | -4.358277 | -1.637222 |
| 1  | -0.876184 | -3.523552 | -2.368623 |

|   |           |           |           |
|---|-----------|-----------|-----------|
| 1 | 0.000000  | 0.000000  | 3.190624  |
| 1 | 0.046094  | 1.265175  | -2.505842 |
| 1 | -1.392431 | 0.629816  | -1.736561 |
| 1 | 1.392431  | -0.629816 | -1.736561 |
| 1 | -0.046094 | -1.265175 | -2.505842 |

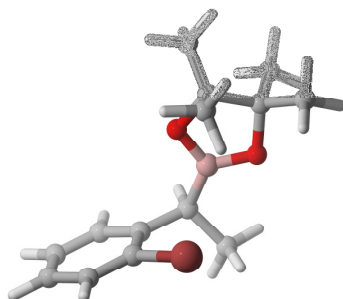

Hydroboration product (entry 11)

RM06 energy: -3294.6307469

Sum of electronic and thermal Free Energies: -3294.36006

|    |           |           |           |
|----|-----------|-----------|-----------|
| 6  | -0.525407 | -1.128257 | 1.191725  |
| 6  | -0.710529 | -0.624410 | 2.623127  |
| 1  | -0.832501 | 0.462609  | 2.668496  |
| 1  | -1.592751 | -1.078374 | 3.091485  |
| 1  | 0.160859  | -0.876349 | 3.237088  |
| 6  | -1.768266 | -0.965701 | 0.355742  |
| 6  | -2.236185 | 0.258447  | -0.126941 |
| 6  | -3.407024 | 0.373263  | -0.862766 |
| 6  | -4.153825 | -0.760105 | -1.144620 |
| 6  | -3.719434 | -1.994683 | -0.685793 |
| 6  | -2.548976 | -2.084563 | 0.050734  |
| 1  | -2.215999 | -3.057242 | 0.411164  |
| 1  | -4.293736 | -2.892878 | -0.900765 |
| 1  | -5.070754 | -0.672098 | -1.722307 |
| 1  | -3.732436 | 1.347629  | -1.218600 |
| 35 | -1.266080 | 1.875804  | 0.197047  |
| 5  | 0.802241  | -0.634428 | 0.506918  |
| 8  | 1.078863  | -0.841037 | -0.814770 |
| 6  | 2.360404  | -0.223984 | -1.088122 |
| 6  | 3.006197  | -0.151709 | 0.329935  |
| 8  | 1.848595  | -0.093291 | 1.198671  |
| 6  | 3.868487  | 1.062856  | 0.579224  |

|   |           |           |           |
|---|-----------|-----------|-----------|
| 1 | 3.306084  | 1.995849  | 0.485721  |
| 1 | 4.279437  | 1.022151  | 1.594284  |
| 1 | 4.712191  | 1.094790  | -0.121108 |
| 6 | 3.768035  | -1.410193 | 0.703655  |
| 1 | 4.023269  | -1.371500 | 1.768265  |
| 1 | 3.172511  | -2.314970 | 0.536768  |
| 1 | 4.700782  | -1.503286 | 0.136574  |
| 6 | 3.108646  | -1.077696 | -2.084922 |
| 1 | 2.584577  | -1.066606 | -3.047235 |
| 1 | 4.119862  | -0.687062 | -2.251950 |
| 1 | 3.188754  | -2.118930 | -1.761166 |
| 6 | 2.080312  | 1.139681  | -1.691237 |
| 1 | 1.429601  | 1.015172  | -2.563792 |
| 1 | 1.565763  | 1.801783  | -0.987966 |
| 1 | 3.001103  | 1.633361  | -2.021914 |
| 1 | -0.359306 | -2.218095 | 1.266058  |

## B. Cu(I)/Cu(III) pathways.

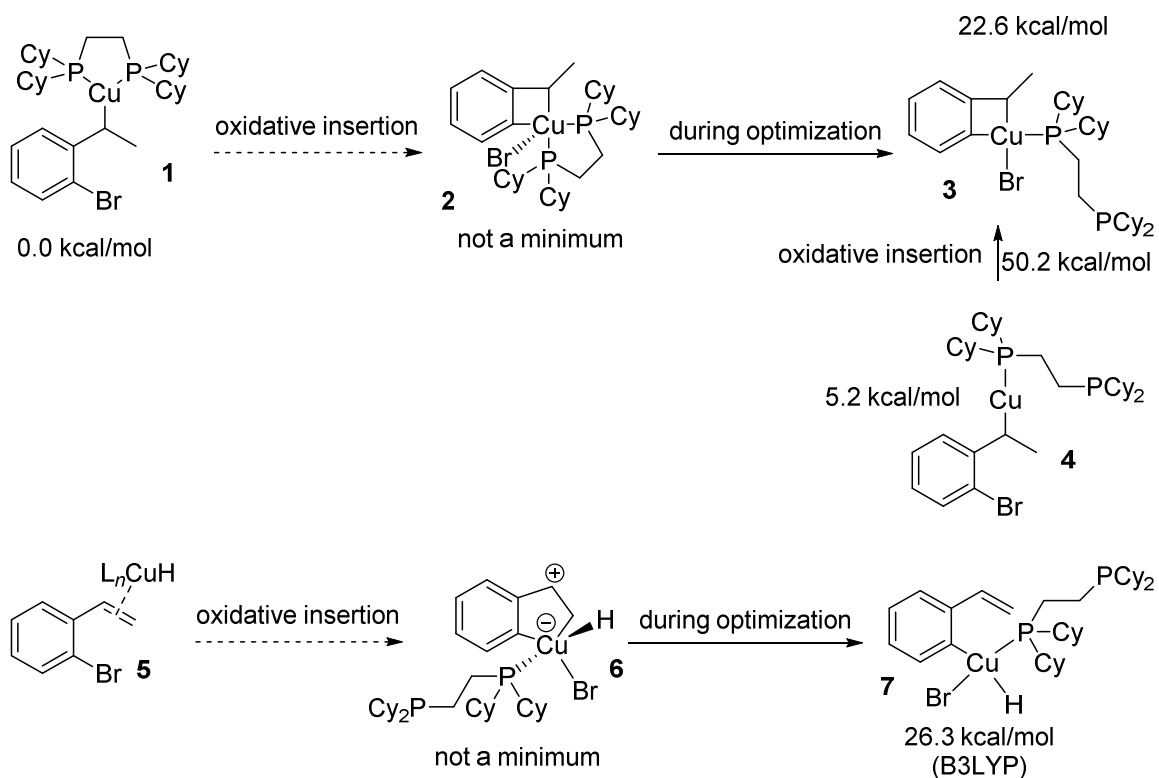

Three oxidative insertion pathways were ultimately considered: 1) oxidative insertion from the benzyl copper **1**, 2) oxidative insertion from the  $\pi$ -acid complex **5**, 3) oxidative insertion of the copper-hydride. The pentacoordinate complex **2** that results from oxidative insertion from the benzyl copper always dissociated a phosphine ligand during the optimization. The tetracoordinate oxidative insertion product **3** was energetically feasible, but the transition state energy leading to this intermediate was far too high. The oxidative insertion intermediate from the  $\pi$ -acid complex **5** always broke a carbon-copper bond to form the intermediate that results from direct oxidative insertion of copper-hydride into the aryl-bromine bond (**7**). The direct oxidative insertion intermediate was also too high in energy (relative to the benzyl copper); thus, it is reasonable to expect that the transition state energy would also be too high in energy.



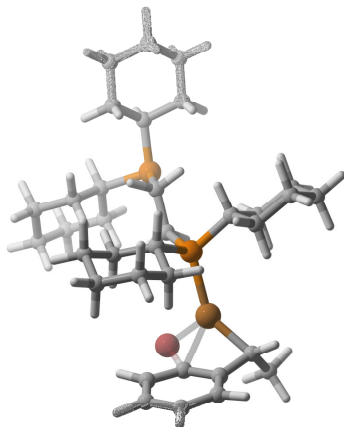

Oxidative insertion from benzyl copper to cupracyclobutane – TS – dCype (entry 13)

RM06 energy: -4781.5217209

Sum of electronic and thermal Free Energies: -4780.769833

Imaginary frequency: -278.1170

|    |           |           |           |
|----|-----------|-----------|-----------|
| 6  | -2.247489 | 0.249004  | 0.049050  |
| 6  | -0.870954 | -0.121036 | -0.484392 |
| 15 | 0.573033  | 0.839606  | 0.136540  |
| 6  | 0.023744  | 2.598010  | -0.065992 |
| 1  | -0.915271 | 2.716052  | 0.500756  |
| 6  | -0.248828 | 2.868874  | -1.547466 |
| 6  | -0.673697 | 4.309378  | -1.791877 |
| 6  | 0.352035  | 5.289094  | -1.247206 |
| 6  | 0.601534  | 5.035316  | 0.230132  |
| 6  | 1.036136  | 3.598576  | 0.488066  |
| 1  | 1.173630  | 3.449026  | 1.566122  |
| 1  | 2.016909  | 3.420359  | 0.016598  |
| 1  | -0.322978 | 5.240474  | 0.794062  |
| 1  | 1.360241  | 5.726361  | 0.620208  |
| 1  | 0.023923  | 6.323824  | -1.410902 |
| 1  | 1.297232  | 5.169983  | -1.801108 |
| 1  | -1.645641 | 4.486897  | -1.302259 |
| 1  | -0.835402 | 4.470833  | -2.865526 |
| 1  | 0.671147  | 2.655835  | -2.119227 |
| 1  | -1.018575 | 2.188980  | -1.937105 |
| 6  | 0.704573  | 0.529877  | 1.966228  |
| 1  | -0.008164 | 1.194764  | 2.484072  |
| 6  | 0.375675  | -0.922461 | 2.314070  |
| 6  | 0.597985  | -1.210069 | 3.793892  |
| 6  | 2.016807  | -0.876588 | 4.224953  |

|    |           |           |           |
|----|-----------|-----------|-----------|
| 6  | 2.353209  | 0.567798  | 3.894679  |
| 6  | 2.133998  | 0.852529  | 2.417118  |
| 1  | 2.399473  | 1.891028  | 2.185480  |
| 1  | 2.821393  | 0.226785  | 1.824680  |
| 1  | 1.721667  | 1.239679  | 4.498439  |
| 1  | 3.394008  | 0.794160  | 4.163194  |
| 1  | 2.148513  | -1.070632 | 5.297459  |
| 1  | 2.722368  | -1.540202 | 3.698893  |
| 1  | -0.111330 | -0.611057 | 4.387707  |
| 1  | 0.365498  | -2.262244 | 4.004924  |
| 1  | -0.659904 | -1.162337 | 2.044328  |
| 1  | 1.018330  | -1.590880 | 1.715280  |
| 29 | 2.567914  | 0.247862  | -0.839406 |
| 6  | 4.333075  | 1.114295  | -1.398641 |
| 6  | 4.544880  | 0.834633  | -2.870721 |
| 1  | 5.592169  | 0.996995  | -3.183802 |
| 1  | 4.294479  | -0.199719 | -3.137806 |
| 1  | 3.921008  | 1.482029  | -3.499877 |
| 6  | 4.940100  | 0.146418  | -0.460738 |
| 6  | 5.944951  | 0.335859  | 0.493594  |
| 6  | 6.186418  | -0.643855 | 1.452205  |
| 6  | 5.406558  | -1.790165 | 1.516114  |
| 6  | 4.328543  | -1.968138 | 0.636541  |
| 6  | 4.181157  | -1.011709 | -0.334381 |
| 1  | 3.668373  | -2.825133 | 0.731369  |
| 1  | 5.622198  | -2.564400 | 2.249696  |
| 1  | 6.986444  | -0.503019 | 2.176400  |
| 1  | 6.483648  | 1.284250  | 0.510668  |
| 1  | 4.557680  | 2.153753  | -1.128618 |
| 35 | 2.366382  | -2.027872 | -1.763079 |
| 1  | -0.636457 | -1.178090 | -0.307290 |
| 1  | -0.832331 | -0.010932 | -1.577818 |
| 15 | -3.592800 | -0.326686 | -1.102980 |
| 6  | -5.125209 | 0.425155  | -0.339880 |
| 6  | -5.387299 | 0.152488  | 1.137611  |
| 6  | -6.701122 | 0.777090  | 1.593975  |
| 6  | -6.737195 | 2.269647  | 1.305235  |
| 6  | -6.483765 | 2.545928  | -0.168956 |
| 6  | -5.170825 | 1.926323  | -0.629482 |
| 1  | -4.339098 | 2.428943  | -0.107574 |
| 1  | -5.015720 | 2.109490  | -1.702123 |
| 1  | -7.309009 | 2.123234  | -0.764084 |
| 1  | -6.481822 | 3.626400  | -0.365455 |
| 1  | -5.962947 | 2.773730  | 1.906545  |
| 1  | -7.698202 | 2.698974  | 1.617783  |
| 1  | -7.535888 | 0.285382  | 1.068756  |

|   |           |           |           |
|---|-----------|-----------|-----------|
| 1 | -6.856358 | 0.587504  | 2.664681  |
| 1 | -5.401260 | -0.927274 | 1.335155  |
| 1 | -4.565104 | 0.572382  | 1.739158  |
| 1 | -5.939884 | -0.044620 | -0.921116 |
| 6 | -3.810347 | -2.153063 | -0.716417 |
| 6 | -3.218598 | -2.666849 | 0.593192  |
| 6 | -3.521447 | -4.146119 | 0.797148  |
| 6 | -3.010686 | -4.976813 | -0.369889 |
| 6 | -3.580519 | -4.474358 | -1.687436 |
| 6 | -3.296616 | -2.992304 | -1.889031 |
| 1 | -3.745646 | -2.639947 | -2.827564 |
| 1 | -2.209162 | -2.838368 | -1.997623 |
| 1 | -3.178188 | -5.054900 | -2.528205 |
| 1 | -4.671204 | -4.633910 | -1.694526 |
| 1 | -1.910692 | -4.912959 | -0.403467 |
| 1 | -3.254277 | -6.037562 | -0.224480 |
| 1 | -3.079391 | -4.494057 | 1.740571  |
| 1 | -4.610466 | -4.283953 | 0.895931  |
| 1 | -2.125301 | -2.536123 | 0.571615  |
| 1 | -3.581874 | -2.085879 | 1.449866  |
| 1 | -4.906506 | -2.285598 | -0.673516 |
| 1 | -2.367951 | 1.339367  | 0.082414  |
| 1 | -2.385364 | -0.106556 | 1.077625  |

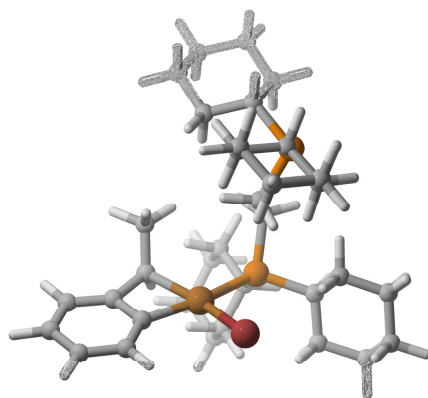

Cupracyclobutane – dCype (entry 14)

RM06 energy: -4781.5722064

Sum of electronic and thermal Free Energies: -4780.81397

|    |           |          |           |
|----|-----------|----------|-----------|
| 6  | 1.516403  | 0.153170 | -0.462048 |
| 6  | 0.579098  | 1.087878 | -1.224903 |
| 15 | -1.153303 | 0.446557 | -1.180505 |

|    |           |           |           |
|----|-----------|-----------|-----------|
| 6  | -2.293735 | 1.850628  | -1.645879 |
| 1  | -2.329398 | 1.846349  | -2.748910 |
| 6  | -1.809055 | 3.232100  | -1.206110 |
| 6  | -2.794908 | 4.317706  | -1.620801 |
| 6  | -4.195927 | 4.038797  | -1.099288 |
| 6  | -4.678267 | 2.671983  | -1.555874 |
| 6  | -3.709748 | 1.581914  | -1.122244 |
| 1  | -4.071403 | 0.599399  | -1.449305 |
| 1  | -3.690694 | 1.536971  | -0.023738 |
| 1  | -4.770389 | 2.664054  | -2.653793 |
| 1  | -5.679368 | 2.460606  | -1.158706 |
| 1  | -4.889897 | 4.823709  | -1.426881 |
| 1  | -4.188466 | 4.070790  | 0.002717  |
| 1  | -2.823506 | 4.374782  | -2.720736 |
| 1  | -2.437134 | 5.294816  | -1.270409 |
| 1  | -1.680969 | 3.258202  | -0.112765 |
| 1  | -0.825432 | 3.448366  | -1.641020 |
| 6  | -1.192875 | -0.579561 | -2.743738 |
| 1  | -1.055368 | 0.178848  | -3.537741 |
| 6  | -0.041735 | -1.579093 | -2.857915 |
| 6  | -0.106702 | -2.355476 | -4.166414 |
| 6  | -1.442628 | -3.061268 | -4.323155 |
| 6  | -2.579594 | -2.056506 | -4.253582 |
| 6  | -2.545974 | -1.255869 | -2.958267 |
| 1  | -3.348307 | -0.508821 | -2.982716 |
| 1  | -2.753698 | -1.918819 | -2.105253 |
| 1  | -2.502923 | -1.365166 | -5.108823 |
| 1  | -3.551109 | -2.558805 | -4.349428 |
| 1  | -1.478652 | -3.619367 | -5.268016 |
| 1  | -1.559845 | -3.802429 | -3.515868 |
| 1  | 0.041330  | -1.664361 | -5.012375 |
| 1  | 0.722319  | -3.074364 | -4.205561 |
| 1  | 0.924308  | -1.062603 | -2.793737 |
| 1  | -0.086371 | -2.284998 | -2.018045 |
| 29 | -1.636428 | -0.476855 | 0.934838  |
| 6  | -1.720854 | 1.280200  | 2.036322  |
| 6  | -0.362959 | 1.892509  | 2.178051  |
| 1  | -0.416216 | 2.719309  | 2.906678  |
| 1  | 0.363621  | 1.173682  | 2.576713  |
| 1  | 0.028398  | 2.304546  | 1.243372  |
| 6  | -2.249864 | 0.580680  | 3.234547  |
| 6  | -2.608419 | 0.906433  | 4.533240  |
| 6  | -2.989453 | -0.155434 | 5.349948  |
| 6  | -2.983543 | -1.468699 | 4.876895  |
| 6  | -2.596595 | -1.772306 | 3.571818  |
| 6  | -2.239676 | -0.704228 | 2.762276  |

|    |           |           |           |
|----|-----------|-----------|-----------|
| 1  | -2.578265 | -2.800671 | 3.216121  |
| 1  | -3.285117 | -2.273889 | 5.545809  |
| 1  | -3.292061 | 0.036114  | 6.377902  |
| 1  | -2.598940 | 1.929304  | 4.907999  |
| 1  | -2.447246 | 1.873568  | 1.473308  |
| 35 | -1.398581 | -2.824257 | 0.426999  |
| 1  | 0.607049  | 2.090747  | -0.785861 |
| 1  | 0.874174  | 1.205598  | -2.278330 |
| 15 | 3.270908  | 0.208431  | -1.072758 |
| 6  | 4.023343  | -1.219746 | -0.129641 |
| 6  | 3.826246  | -1.251752 | 1.383327  |
| 6  | 4.522610  | -2.453053 | 2.012100  |
| 6  | 4.057357  | -3.755582 | 1.380926  |
| 6  | 4.272167  | -3.734921 | -0.124372 |
| 6  | 3.576725  | -2.539959 | -0.762374 |
| 1  | 2.487788  | -2.660413 | -0.636276 |
| 1  | 3.760490  | -2.521063 | -1.846061 |
| 1  | 5.352192  | -3.683175 | -0.338242 |
| 1  | 3.910347  | -4.666808 | -0.578703 |
| 1  | 2.984199  | -3.896642 | 1.590913  |
| 1  | 4.576599  | -4.610855 | 1.833360  |
| 1  | 5.611796  | -2.352017 | 1.876680  |
| 1  | 4.345275  | -2.463775 | 3.095939  |
| 1  | 4.200566  | -0.326597 | 1.840431  |
| 1  | 2.749904  | -1.306719 | 1.616062  |
| 1  | 5.104930  | -1.108043 | -0.329406 |
| 6  | 4.015592  | 1.715012  | -0.230043 |
| 6  | 3.275274  | 2.279112  | 0.980452  |
| 6  | 4.016080  | 3.467574  | 1.580696  |
| 6  | 4.229956  | 4.562180  | 0.547161  |
| 6  | 4.953029  | 4.021656  | -0.677248 |
| 6  | 4.229971  | 2.819314  | -1.268000 |
| 1  | 4.787182  | 2.424636  | -2.128234 |
| 1  | 3.249219  | 3.137490  | -1.662962 |
| 1  | 5.067366  | 4.806563  | -1.436916 |
| 1  | 5.973153  | 3.718863  | -0.390219 |
| 1  | 3.250645  | 4.965308  | 0.241096  |
| 1  | 4.786133  | 5.402403  | 0.983503  |
| 1  | 3.462321  | 3.856958  | 2.445786  |
| 1  | 4.992399  | 3.130137  | 1.964568  |
| 1  | 2.273408  | 2.613857  | 0.666279  |
| 1  | 3.113356  | 1.510226  | 1.745870  |
| 1  | 5.012262  | 1.371453  | 0.101580  |
| 1  | 1.210871  | -0.893409 | -0.581591 |
| 1  | 1.451804  | 0.356776  | 0.612453  |

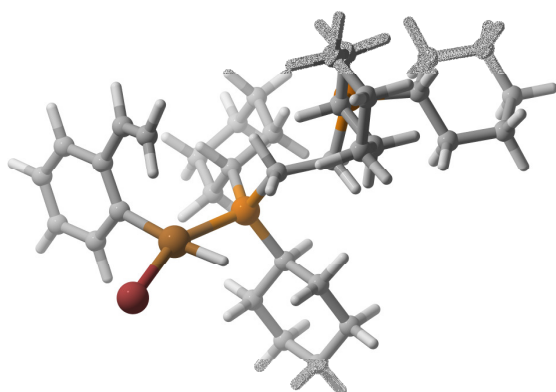

Copper-hydride oxidative insertion into Ar-Br bond (entry 15)

RB3LYP energy: -4782.7628464

Sum of electronic and thermal Free Energies: -4782.008426

|    |           |           |           |
|----|-----------|-----------|-----------|
| 6  | 0.665830  | 0.330206  | -0.080771 |
| 15 | -0.895274 | -0.579334 | 0.370733  |
| 6  | -1.184869 | -1.794600 | -1.038852 |
| 1  | -1.516674 | -1.130219 | -1.843891 |
| 6  | 0.092661  | -2.519861 | -1.511379 |
| 6  | -0.200918 | -3.399491 | -2.739907 |
| 6  | -1.339483 | -4.391879 | -2.487494 |
| 6  | -2.597941 | -3.668592 | -1.999084 |
| 6  | -2.310051 | -2.807285 | -0.759613 |
| 1  | -2.014892 | -3.467695 | 0.063435  |
| 1  | -3.221702 | -2.291485 | -0.453285 |
| 1  | -2.991830 | -3.030093 | -2.799171 |
| 1  | -3.386736 | -4.389948 | -1.760573 |
| 1  | -1.024091 | -5.124034 | -1.732247 |
| 1  | -1.554959 | -4.959523 | -3.399155 |
| 1  | -0.463484 | -2.751675 | -3.585698 |
| 1  | 0.714276  | -3.928457 | -3.026964 |
| 1  | 0.871908  | -1.803900 | -1.777665 |
| 1  | 0.489776  | -3.146432 | -0.703519 |
| 6  | -0.754986 | -1.529253 | 1.970728  |
| 1  | -0.267454 | -2.475940 | 1.707385  |
| 6  | 0.093572  | -0.811493 | 3.038444  |
| 6  | 0.172359  | -1.634961 | 4.334760  |
| 6  | -1.213720 | -1.976331 | 4.889942  |

|    |           |           |           |
|----|-----------|-----------|-----------|
| 6  | -2.079089 | -2.660798 | 3.827782  |
| 6  | -2.161512 | -1.828188 | 2.540230  |
| 1  | -2.658331 | -0.875691 | 2.759168  |
| 1  | -2.783749 | -2.343818 | 1.808946  |
| 1  | -3.090875 | -2.830884 | 4.210729  |
| 1  | -1.664603 | -3.650226 | 3.595049  |
| 1  | -1.709579 | -1.054787 | 5.220554  |
| 1  | -1.120182 | -2.614727 | 5.775014  |
| 1  | 0.725859  | -2.562212 | 4.137448  |
| 1  | 0.754583  | -1.078855 | 5.077097  |
| 1  | -0.352290 | 0.166516  | 3.256794  |
| 1  | 1.103163  | -0.624385 | 2.672846  |
| 29 | -2.574453 | 0.947373  | 0.478875  |
| 15 | 3.306033  | 0.192959  | -1.094596 |
| 6  | 2.039465  | -0.314536 | 0.197645  |
| 1  | 2.374790  | -0.046579 | 1.198686  |
| 1  | 1.996246  | -1.403675 | 0.163114  |
| 6  | 3.547963  | 2.027500  | -0.729964 |
| 1  | 2.536993  | 2.438793  | -0.862814 |
| 6  | 4.040747  | 2.425500  | 0.672424  |
| 6  | 4.134963  | 3.952505  | 0.827685  |
| 6  | 5.022750  | 4.577262  | -0.254997 |
| 6  | 4.549099  | 4.183218  | -1.659090 |
| 6  | 4.438880  | 2.659385  | -1.819810 |
| 1  | 5.444037  | 2.220681  | -1.770750 |
| 1  | 4.044852  | 2.416651  | -2.812296 |
| 1  | 3.567539  | 4.636401  | -1.850371 |
| 1  | 5.229264  | 4.587249  | -2.417441 |
| 1  | 6.058127  | 4.239512  | -0.113254 |
| 1  | 5.036656  | 5.667941  | -0.152098 |
| 1  | 4.518772  | 4.200149  | 1.823937  |
| 1  | 3.128245  | 4.386564  | 0.767329  |
| 1  | 5.032188  | 1.991957  | 0.848284  |
| 1  | 3.380215  | 2.018312  | 1.444564  |
| 6  | 4.905182  | -0.635701 | -0.505603 |
| 1  | 5.678581  | 0.119270  | -0.700507 |
| 6  | 4.994278  | -1.035650 | 0.979703  |
| 6  | 6.352446  | -1.672593 | 1.317017  |
| 6  | 6.652952  | -2.878224 | 0.419398  |
| 6  | 6.560709  | -2.501827 | -1.063635 |
| 6  | 5.212303  | -1.851580 | -1.407024 |
| 1  | 4.412632  | -2.597154 | -1.298214 |
| 1  | 5.203453  | -1.546800 | -2.458386 |
| 1  | 7.369639  | -1.801129 | -1.309752 |
| 1  | 6.716865  | -3.385891 | -1.692090 |
| 1  | 5.932506  | -3.678524 | 0.635860  |

|    |           |           |           |
|----|-----------|-----------|-----------|
| 1  | 7.644478  | -3.284735 | 0.647516  |
| 1  | 7.145015  | -0.922082 | 1.197282  |
| 1  | 6.366858  | -1.970868 | 2.371706  |
| 1  | 4.825379  | -0.170929 | 1.625867  |
| 1  | 4.202494  | -1.757805 | 1.212772  |
| 1  | 0.602346  | 1.297537  | 0.416546  |
| 1  | 0.528915  | 0.533276  | -1.147901 |
| 6  | -2.425346 | 1.489163  | -2.881682 |
| 6  | -1.605443 | 2.322121  | -2.230497 |
| 1  | -1.769496 | 2.611218  | -1.196273 |
| 1  | -0.758617 | 2.780863  | -2.731632 |
| 1  | -2.227351 | 1.312098  | -3.938882 |
| 6  | -3.619394 | 0.803572  | -2.351171 |
| 6  | -3.825161 | 0.538138  | -0.975984 |
| 6  | -5.035683 | -0.071400 | -0.613576 |
| 6  | -6.008592 | -0.429310 | -1.549641 |
| 6  | -5.782866 | -0.187339 | -2.904087 |
| 6  | -4.595560 | 0.421885  | -3.293535 |
| 1  | -4.419482 | 0.622684  | -4.347926 |
| 1  | -6.523906 | -0.466955 | -3.647026 |
| 1  | -6.931428 | -0.901915 | -1.223684 |
| 1  | -5.236845 | -0.277882 | 0.435354  |
| 35 | -3.610456 | 2.817585  | 1.604561  |
| 1  | -1.497643 | 1.029208  | 1.540954  |



**C. Pathways involving one-electron changes at copper.**

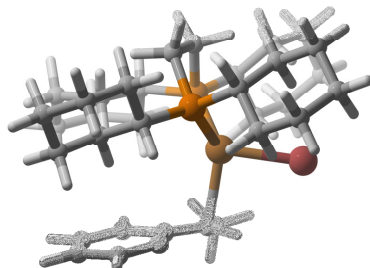

Benzyl copper bromide/aryl radical (triplet) (entry 16)

UM06 energy: -4781.5688977

Sum of electronic and thermal Free Energies: -4780.812989

|    |           |           |           |
|----|-----------|-----------|-----------|
| 6  | -0.716844 | 0.490610  | -2.321180 |
| 6  | 0.788850  | 0.221130  | -2.362715 |
| 15 | 1.492663  | -0.758055 | -0.943948 |
| 6  | 1.327650  | -2.525911 | -1.527087 |
| 1  | 1.775207  | -2.556659 | -2.537259 |
| 6  | -0.138250 | -2.941749 | -1.624557 |
| 6  | -0.301827 | -4.393889 | -2.051698 |
| 6  | 0.460947  | -5.333620 | -1.133476 |
| 6  | 1.926879  | -4.939750 | -1.068989 |
| 6  | 2.095469  | -3.492853 | -0.626181 |
| 1  | 3.162846  | -3.240584 | -0.601842 |
| 1  | 1.726137  | -3.388559 | 0.408386  |
| 1  | 2.382644  | -5.069811 | -2.063945 |
| 1  | 2.478617  | -5.601828 | -0.388779 |
| 1  | 0.353408  | -6.373571 | -1.468433 |
| 1  | 0.026037  | -5.286562 | -0.121235 |
| 1  | 0.069758  | -4.513426 | -3.082254 |
| 1  | -1.368812 | -4.653627 | -2.075636 |
| 1  | -0.619801 | -2.795001 | -0.642811 |
| 1  | -0.673646 | -2.295448 | -2.329483 |
| 6  | 3.342975  | -0.490027 | -1.087075 |
| 1  | 3.719059  | -1.275052 | -1.767082 |
| 6  | 3.746671  | 0.864935  | -1.668899 |
| 6  | 5.262393  | 1.022952  | -1.706429 |
| 6  | 5.888475  | 0.823042  | -0.337008 |

|    |           |           |           |
|----|-----------|-----------|-----------|
| 6  | 5.497482  | -0.529774 | 0.236317  |
| 6  | 3.983965  | -0.674428 | 0.291914  |
| 1  | 3.710460  | -1.646621 | 0.721896  |
| 1  | 3.567880  | 0.088900  | 0.967479  |
| 1  | 5.924015  | -1.330766 | -0.390453 |
| 1  | 5.923058  | -0.662569 | 1.239867  |
| 1  | 6.980690  | 0.921167  | -0.395169 |
| 1  | 5.538443  | 1.616810  | 0.342631  |
| 1  | 5.682843  | 0.283549  | -2.407978 |
| 1  | 5.519993  | 2.011202  | -2.109843 |
| 1  | 3.351685  | 0.985487  | -2.684957 |
| 1  | 3.308917  | 1.670844  | -1.056735 |
| 29 | 0.361187  | 0.346299  | 0.809462  |
| 15 | -1.349185 | 1.054484  | -0.662826 |
| 6  | -3.128422 | 0.492436  | -0.696234 |
| 6  | -3.967799 | 1.048666  | -1.845891 |
| 6  | -5.408724 | 0.555318  | -1.773899 |
| 6  | -5.480674 | -0.962356 | -1.736902 |
| 6  | -4.657562 | -1.508948 | -0.581726 |
| 6  | -3.213562 | -1.033260 | -0.660447 |
| 1  | -2.761338 | -1.452912 | -1.572941 |
| 1  | -2.631284 | -1.427270 | 0.182833  |
| 1  | -5.099130 | -1.172226 | 0.369892  |
| 1  | -4.688319 | -2.607049 | -0.564299 |
| 1  | -5.093509 | -1.368718 | -2.685624 |
| 1  | -6.523750 | -1.296383 | -1.660356 |
| 1  | -5.882047 | 0.962490  | -0.865909 |
| 1  | -5.980370 | 0.950895  | -2.623935 |
| 1  | -3.960169 | 2.145748  | -1.844169 |
| 1  | -3.528419 | 0.734150  | -2.806341 |
| 1  | -3.546220 | 0.867906  | 0.254169  |
| 6  | -1.472838 | 2.897979  | -0.845157 |
| 6  | -0.139392 | 3.524128  | -1.252100 |
| 6  | -0.247396 | 5.041540  | -1.330100 |
| 6  | -0.736118 | 5.628435  | -0.015470 |
| 6  | -2.072964 | 5.020858  | 0.381536  |
| 6  | -1.984397 | 3.502921  | 0.461653  |
| 1  | -2.965908 | 3.081922  | 0.721619  |
| 1  | -1.294689 | 3.218809  | 1.273081  |
| 1  | -2.413644 | 5.427100  | 1.343250  |
| 1  | -2.835710 | 5.302741  | -0.362913 |
| 1  | 0.005345  | 5.416934  | 0.771294  |
| 1  | -0.815657 | 6.721413  | -0.086388 |
| 1  | 0.725253  | 5.470209  | -1.605921 |
| 1  | -0.948784 | 5.318917  | -2.134424 |
| 1  | 0.632368  | 3.251703  | -0.515907 |

|    |           |           |           |
|----|-----------|-----------|-----------|
| 1  | 0.187124  | 3.128620  | -2.223445 |
| 1  | -2.199764 | 3.109591  | -1.646768 |
| 6  | 0.220872  | -0.786589 | 2.903016  |
| 6  | 1.527912  | -1.479435 | 3.042186  |
| 1  | 1.572561  | -2.048408 | 3.985740  |
| 1  | 1.723125  | -2.196041 | 2.235339  |
| 1  | 2.349414  | -0.757503 | 3.055015  |
| 6  | -1.001946 | -1.463769 | 2.676918  |
| 6  | -1.100245 | -2.835509 | 2.302866  |
| 6  | -2.328311 | -3.462174 | 2.209289  |
| 6  | -3.517265 | -2.775990 | 2.472320  |
| 6  | -3.470170 | -1.416643 | 2.808882  |
| 6  | -2.238755 | -0.837730 | 2.875906  |
| 1  | -4.384957 | -0.858770 | 3.004429  |
| 1  | -4.475210 | -3.288295 | 2.408454  |
| 1  | -2.368740 | -4.515352 | 1.937808  |
| 1  | -0.188427 | -3.400494 | 2.110722  |
| 1  | 0.135913  | 0.207592  | 3.341089  |
| 35 | 1.699433  | 2.126592  | 1.832539  |
| 1  | 1.067126  | -0.250891 | -3.316457 |
| 1  | 1.311441  | 1.183050  | -2.331840 |
| 1  | -1.278758 | -0.410025 | -2.589307 |
| 1  | -0.973536 | 1.239570  | -3.083299 |

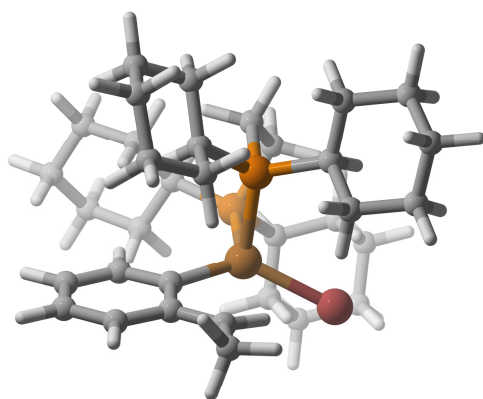

Aryl copper bromide/benzyl radical (triplet) (entry 17)

UM06 energy: -4781.5787403

Sum of electronic and thermal Free Energies: -4780.825517

|    |           |           |           |
|----|-----------|-----------|-----------|
| 6  | 0.190172  | 0.060376  | -2.294520 |
| 15 | 1.289894  | -0.274444 | -0.845528 |
| 6  | 2.023016  | -1.935685 | -1.215889 |
| 6  | 2.921662  | -2.022437 | -2.447564 |
| 6  | 3.294695  | -3.473010 | -2.731265 |
| 6  | 3.960983  | -4.119898 | -1.526271 |
| 6  | 3.087834  | -4.004716 | -0.285659 |
| 6  | 2.712800  | -2.557354 | -0.000543 |
| 1  | 3.621279  | -1.985573 | 0.248261  |
| 1  | 2.049650  | -2.503858 | 0.870737  |
| 1  | 2.163266  | -4.587776 | -0.429131 |
| 1  | 3.595148  | -4.440633 | 0.585022  |
| 1  | 4.195357  | -5.171588 | -1.737377 |
| 1  | 4.924932  | -3.620174 | -1.336455 |
| 1  | 2.383901  | -4.035948 | -2.991140 |
| 1  | 3.951664  | -3.525025 | -3.609676 |
| 1  | 3.841383  | -1.445246 | -2.267834 |
| 1  | 2.438320  | -1.578715 | -3.328007 |
| 1  | 1.114427  | -2.534396 | -1.414720 |
| 6  | 2.561000  | 1.073136  | -0.957421 |
| 1  | 2.013945  | 1.929674  | -0.521243 |
| 6  | 3.026478  | 1.492657  | -2.353393 |
| 6  | 3.908686  | 2.733436  | -2.259745 |
| 6  | 5.098515  | 2.514185  | -1.336415 |
| 6  | 4.649213  | 2.043006  | 0.038531  |
| 6  | 3.773107  | 0.803075  | -0.065898 |
| 1  | 4.362250  | -0.019810 | -0.500053 |
| 1  | 3.459583  | 0.472501  | 0.931464  |
| 1  | 4.078884  | 2.844183  | 0.536745  |
| 1  | 5.517180  | 1.836321  | 0.679267  |
| 1  | 5.692504  | 3.433861  | -1.254310 |
| 1  | 5.764273  | 1.754609  | -1.777736 |
| 1  | 3.304135  | 3.573159  | -1.880989 |
| 1  | 4.248850  | 3.025214  | -3.262221 |
| 1  | 3.595822  | 0.674863  | -2.818496 |
| 1  | 2.175668  | 1.696675  | -3.014719 |
| 29 | -0.288719 | -0.256244 | 0.925664  |
| 6  | 0.473923  | 1.306681  | 1.879179  |
| 6  | 1.608026  | 1.148243  | 2.726973  |
| 6  | 2.168803  | 2.324768  | 3.297041  |
| 6  | 1.618897  | 3.570158  | 3.067340  |
| 6  | 0.485869  | 3.699609  | 2.265405  |
| 6  | -0.071901 | 2.560599  | 1.677544  |
| 1  | -0.951062 | 2.674968  | 1.043611  |

|    |           |           |           |
|----|-----------|-----------|-----------|
| 1  | 0.041115  | 4.678269  | 2.090702  |
| 1  | 2.068544  | 4.451647  | 3.521296  |
| 1  | 3.040165  | 2.238102  | 3.945438  |
| 6  | 2.166779  | -0.121768 | 2.977649  |
| 1  | 1.617530  | -0.988221 | 2.609286  |
| 6  | 3.424975  | -0.350789 | 3.729048  |
| 1  | 3.746532  | -1.394530 | 3.655805  |
| 1  | 4.250992  | 0.277474  | 3.361622  |
| 1  | 3.324711  | -0.121900 | 4.801955  |
| 15 | -2.134430 | 0.198745  | -0.672893 |
| 6  | -1.234764 | -0.475102 | -2.152321 |
| 1  | -1.803566 | -0.275731 | -3.072266 |
| 1  | -1.204154 | -1.565550 | -2.035988 |
| 6  | -2.862865 | 1.804998  | -1.305763 |
| 6  | -1.818153 | 2.773869  | -1.858015 |
| 6  | -2.418035 | 4.123725  | -2.231522 |
| 6  | -3.179911 | 4.740157  | -1.071442 |
| 6  | -4.277583 | 3.798048  | -0.611221 |
| 6  | -3.708982 | 2.446760  | -0.202628 |
| 1  | -3.094449 | 2.574242  | 0.703595  |
| 1  | -4.530229 | 1.776244  | 0.080118  |
| 1  | -5.001323 | 3.658365  | -1.430289 |
| 1  | -4.839163 | 4.230002  | 0.227244  |
| 1  | -2.484970 | 4.930387  | -0.236177 |
| 1  | -3.597252 | 5.714351  | -1.357215 |
| 1  | -1.622149 | 4.794858  | -2.580176 |
| 1  | -3.105976 | 3.991403  | -3.082269 |
| 1  | -1.014537 | 2.926699  | -1.119042 |
| 1  | -1.345137 | 2.341521  | -2.747515 |
| 1  | -3.533710 | 1.520901  | -2.136500 |
| 6  | -3.692782 | -0.834553 | -0.534908 |
| 6  | -3.589686 | -2.237320 | -1.131948 |
| 6  | -4.899099 | -3.000080 | -0.964409 |
| 6  | -5.332213 | -3.063464 | 0.491755  |
| 6  | -5.442258 | -1.667067 | 1.082341  |
| 6  | -4.129913 | -0.911961 | 0.931899  |
| 1  | -3.342865 | -1.427490 | 1.502488  |
| 1  | -4.216097 | 0.091838  | 1.369184  |
| 1  | -6.247907 | -1.115165 | 0.569662  |
| 1  | -5.726562 | -1.716604 | 2.141808  |
| 1  | -4.589892 | -3.640142 | 1.066949  |
| 1  | -6.285480 | -3.600812 | 0.585849  |
| 1  | -5.685846 | -2.500601 | -1.553490 |
| 1  | -4.795719 | -4.010407 | -1.382409 |
| 1  | -2.778799 | -2.788679 | -0.631013 |
| 1  | -3.332373 | -2.187308 | -2.197999 |

|    |           |           |           |
|----|-----------|-----------|-----------|
| 1  | -4.466070 | -0.286964 | -1.102242 |
| 35 | -0.736159 | -2.535226 | 1.585094  |
| 1  | 0.650792  | -0.345545 | -3.205198 |
| 1  | 0.185243  | 1.147819  | -2.416122 |

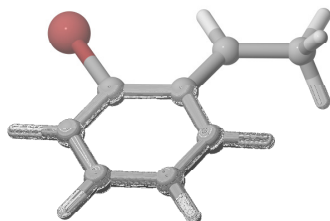

Benzyl radical (doublet) (entry 18)

UM06 energy: -2883.4665678

Sum of electronic and thermal Free Energies: -2883.371259

|    |           |           |           |
|----|-----------|-----------|-----------|
| 6  | 1.916405  | 2.754636  | 0.000192  |
| 6  | 0.774073  | 1.809571  | -0.000259 |
| 6  | 0.915901  | 0.411494  | -0.000117 |
| 6  | -0.181750 | -0.495589 | -0.000021 |
| 6  | -0.008352 | -1.864221 | 0.000080  |
| 6  | 1.274348  | -2.405908 | 0.000066  |
| 6  | 2.378891  | -1.556252 | -0.000028 |
| 6  | 2.205416  | -0.190301 | -0.000101 |
| 1  | 3.079204  | 0.457409  | -0.000182 |
| 1  | 3.383972  | -1.971768 | -0.000058 |
| 1  | 1.402972  | -3.485170 | 0.000120  |
| 1  | -0.875688 | -2.519916 | 0.000182  |
| 35 | -1.974662 | 0.156429  | 0.000010  |
| 1  | -0.230509 | 2.225134  | -0.000480 |
| 1  | 2.564384  | 2.623663  | 0.879422  |
| 1  | 2.566072  | 2.622843  | -0.877646 |
| 1  | 1.573182  | 3.792228  | -0.000577 |

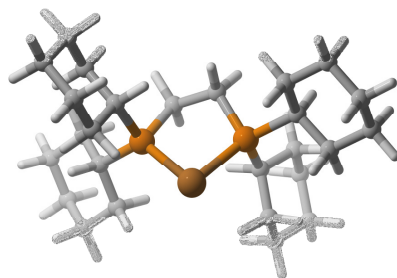

Copper(0) – dCype (entry 19)

UM06 energy: -1898.0253665

Sum of electronic and thermal Free Energies: -1897.391555

|    |          |           |           |
|----|----------|-----------|-----------|
| 6  | 0.591449 | -0.447884 | 1.678737  |
| 15 | 1.603128 | -0.169880 | 0.139635  |
| 6  | 1.953958 | 1.653975  | 0.276218  |
| 1  | 0.966297 | 2.064698  | 0.551293  |
| 6  | 2.940482 | 2.071703  | 1.362165  |
| 6  | 3.039698 | 3.590182  | 1.449839  |
| 6  | 3.404738 | 4.199349  | 0.104343  |
| 6  | 2.413439 | 3.786385  | -0.974067 |
| 6  | 2.306150 | 2.271660  | -1.077329 |
| 1  | 3.260282 | 1.861032  | -1.444070 |
| 1  | 1.546751 | 1.981802  | -1.821288 |
| 1  | 1.421044 | 4.201972  | -0.733020 |
| 1  | 2.699289 | 4.212722  | -1.944606 |
| 1  | 4.413865 | 3.861506  | -0.183603 |
| 1  | 3.456555 | 5.293499  | 0.180777  |
| 1  | 2.071075 | 3.997260  | 1.782795  |
| 1  | 3.774215 | 3.876588  | 2.214382  |
| 1  | 2.644875 | 1.656069  | 2.335601  |
| 1  | 3.938070 | 1.662521  | 1.137819  |
| 6  | 3.177226 | -1.077549 | 0.525796  |
| 1  | 3.554390 | -0.741729 | 1.507715  |
| 6  | 2.886550 | -2.578507 | 0.598520  |
| 6  | 4.155392 | -3.387839 | 0.830918  |
| 6  | 5.202431 | -3.098628 | -0.232542 |
| 6  | 5.503509 | -1.610131 | -0.301970 |
| 6  | 4.236788 | -0.799360 | -0.540287 |
| 1  | 4.480630 | 0.270037  | -0.574531 |

|    |           |           |           |
|----|-----------|-----------|-----------|
| 1  | 3.819443  | -1.051318 | -1.529969 |
| 1  | 5.967070  | -1.287546 | 0.644464  |
| 1  | 6.236186  | -1.400037 | -1.092227 |
| 1  | 4.827776  | -3.437980 | -1.211502 |
| 1  | 6.119364  | -3.669586 | -0.035314 |
| 1  | 4.565780  | -3.138196 | 1.822671  |
| 1  | 3.915244  | -4.458970 | 0.856651  |
| 1  | 2.417901  | -2.894653 | -0.349470 |
| 1  | 2.160029  | -2.796831 | 1.391600  |
| 29 | 0.118191  | -0.389338 | -1.695623 |
| 15 | -1.583735 | -0.107827 | -0.058913 |
| 6  | -0.780699 | 0.216534  | 1.591387  |
| 1  | -1.414964 | -0.101181 | 2.429624  |
| 1  | -0.682050 | 1.306815  | 1.680720  |
| 6  | -2.292112 | -1.816380 | 0.136562  |
| 1  | -1.396076 | -2.417214 | 0.385962  |
| 6  | -3.331674 | -2.030308 | 1.231050  |
| 6  | -3.737839 | -3.496878 | 1.320088  |
| 6  | -4.260513 | -4.004203 | -0.015605 |
| 6  | -3.239048 | -3.784332 | -1.121008 |
| 6  | -2.813793 | -2.325328 | -1.207527 |
| 1  | -3.674871 | -1.710578 | -1.519990 |
| 1  | -2.039948 | -2.186812 | -1.978871 |
| 1  | -2.350377 | -4.404604 | -0.922018 |
| 1  | -3.638057 | -4.118805 | -2.087781 |
| 1  | -5.188610 | -3.465770 | -0.267478 |
| 1  | -4.529342 | -5.066598 | 0.054558  |
| 1  | -4.493209 | -3.631446 | 2.106022  |
| 1  | -2.864414 | -4.097313 | 1.621727  |
| 1  | -4.226097 | -1.430581 | 0.999944  |
| 1  | -2.961317 | -1.679722 | 2.203864  |
| 6  | -2.988514 | 1.104443  | -0.154065 |
| 1  | -3.725896 | 0.619431  | -0.817772 |
| 6  | -3.676749 | 1.479896  | 1.157549  |
| 6  | -4.794129 | 2.489772  | 0.924280  |
| 6  | -4.280742 | 3.736375  | 0.220247  |
| 6  | -3.585987 | 3.377497  | -1.084516 |
| 6  | -2.475651 | 2.361420  | -0.863659 |
| 1  | -1.679580 | 2.819806  | -0.250546 |
| 1  | -2.004410 | 2.085029  | -1.818044 |
| 1  | -4.323855 | 2.953947  | -1.784786 |
| 1  | -3.182777 | 4.277313  | -1.567791 |
| 1  | -3.567483 | 4.256863  | 0.880014  |
| 1  | -5.102428 | 4.441313  | 0.037280  |
| 1  | -5.580645 | 2.023164  | 0.309564  |
| 1  | -5.265803 | 2.753184  | 1.880476  |



|   |           |           |          |
|---|-----------|-----------|----------|
| 1 | -4.074508 | 0.591753  | 1.662369 |
| 1 | -2.936697 | 1.919602  | 1.844914 |
| 1 | 1.133559  | -0.102952 | 2.570844 |
| 1 | 0.469114  | -1.532280 | 1.792536 |

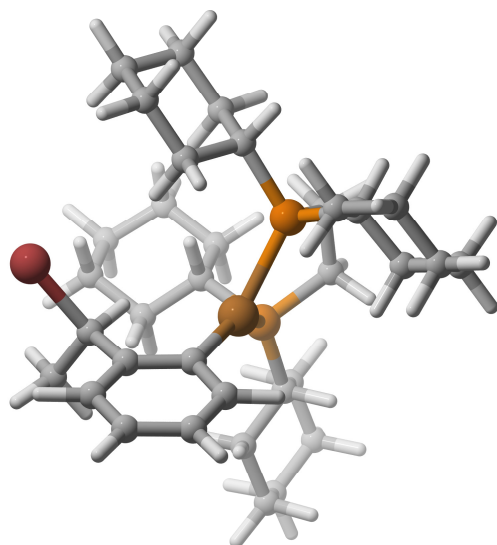

Aryl copper/benzyl bromide (entry 20)

RM06 energy: -4781.6125195

Sum of electronic and thermal Free Energies: -4780.851193

|    |          |           |           |
|----|----------|-----------|-----------|
| 6  | 1.637405 | 2.235275  | -1.461448 |
| 15 | 1.926353 | 0.861289  | -0.248804 |
| 6  | 2.145196 | -0.634884 | -1.334447 |
| 6  | 2.929779 | -0.505354 | -2.636705 |
| 6  | 2.773240 | -1.773751 | -3.469517 |
| 6  | 3.195555 | -3.012097 | -2.691757 |
| 6  | 2.455603 | -3.119523 | -1.365696 |
| 6  | 2.624687 | -1.850009 | -0.543291 |
| 1  | 3.688107 | -1.724083 | -0.286073 |
| 1  | 2.083927 | -1.928111 | 0.408747  |
| 1  | 1.380301 | -3.283885 | -1.555619 |
| 1  | 2.805033 | -3.991958 | -0.797334 |
| 1  | 3.035925 | -3.915536 | -3.294611 |
| 1  | 4.278399 | -2.960236 | -2.492987 |
| 1  | 1.718124 | -1.876335 | -3.772816 |
| 1  | 3.352667 | -1.689925 | -4.398495 |

|    |           |           |           |
|----|-----------|-----------|-----------|
| 1  | 3.994676  | -0.344696 | -2.415161 |
| 1  | 2.601207  | 0.365181  | -3.219336 |
| 1  | 1.093444  | -0.842552 | -1.611074 |
| 6  | 3.528039  | 1.361469  | 0.545330  |
| 1  | 3.320534  | 2.413031  | 0.819186  |
| 6  | 4.782392  | 1.343082  | -0.323113 |
| 6  | 5.981547  | 1.893342  | 0.441058  |
| 6  | 6.206451  | 1.130597  | 1.738176  |
| 6  | 4.956571  | 1.142391  | 2.605034  |
| 6  | 3.754618  | 0.593717  | 1.848962  |
| 1  | 3.926200  | -0.470903 | 1.624343  |
| 1  | 2.850780  | 0.633562  | 2.472444  |
| 1  | 4.742594  | 2.176458  | 2.920085  |
| 1  | 5.119396  | 0.565961  | 3.525205  |
| 1  | 7.059598  | 1.550857  | 2.286716  |
| 1  | 6.473283  | 0.087576  | 1.501914  |
| 1  | 5.807761  | 2.957103  | 0.669891  |
| 1  | 6.879330  | 1.855506  | -0.190149 |
| 1  | 4.998717  | 0.306795  | -0.624955 |
| 1  | 4.625579  | 1.912723  | -1.249187 |
| 29 | -0.161353 | 0.574977  | 0.762570  |
| 6  | -1.006469 | -0.134750 | 2.396214  |
| 6  | -1.153813 | -1.518430 | 2.619347  |
| 6  | -1.775604 | -2.023124 | 3.764084  |
| 6  | -2.281151 | -1.166366 | 4.728422  |
| 6  | -2.152807 | 0.206766  | 4.545810  |
| 6  | -1.528703 | 0.696655  | 3.405256  |
| 1  | -1.450898 | 1.782201  | 3.296632  |
| 1  | -2.546596 | 0.894643  | 5.294399  |
| 1  | -2.771570 | -1.564728 | 5.615083  |
| 1  | -1.881411 | -3.100937 | 3.899284  |
| 6  | -0.532084 | -2.463434 | 1.634480  |
| 35 | -1.877018 | -3.730144 | 0.845234  |
| 1  | -0.209672 | -1.893925 | 0.754348  |
| 6  | 0.611911  | -3.275763 | 2.188120  |
| 1  | 1.373807  | -2.588292 | 2.584061  |
| 1  | 0.292493  | -3.921232 | 3.014071  |
| 1  | 1.080603  | -3.904680 | 1.422415  |
| 15 | -1.069318 | 1.459416  | -1.209284 |
| 6  | 0.350249  | 2.044470  | -2.264124 |
| 1  | 0.076067  | 2.968407  | -2.791417 |
| 1  | 0.519288  | 1.291565  | -3.041215 |
| 6  | -2.063726 | 3.005268  | -0.948862 |
| 6  | -1.238691 | 4.022943  | -0.163116 |
| 6  | -2.038824 | 5.276633  | 0.163405  |
| 6  | -3.324660 | 4.937307  | 0.899081  |

|   |           |           |           |
|---|-----------|-----------|-----------|
| 6 | -4.159556 | 3.955101  | 0.093928  |
| 6 | -3.371648 | 2.691604  | -0.224047 |
| 1 | -3.143347 | 2.159624  | 0.714894  |
| 1 | -3.989267 | 2.008560  | -0.822266 |
| 1 | -4.478984 | 4.433596  | -0.846031 |
| 1 | -5.078046 | 3.692783  | 0.634913  |
| 1 | -3.076941 | 4.487601  | 1.874305  |
| 1 | -3.898357 | 5.848523  | 1.113501  |
| 1 | -1.423004 | 5.966965  | 0.754799  |
| 1 | -2.283556 | 5.804033  | -0.772907 |
| 1 | -0.895835 | 3.552435  | 0.775094  |
| 1 | -0.334287 | 4.296879  | -0.722501 |
| 1 | -2.295295 | 3.422712  | -1.945195 |
| 6 | -2.170247 | 0.409844  | -2.302158 |
| 6 | -1.461695 | -0.240828 | -3.487836 |
| 6 | -2.402413 | -1.144756 | -4.275453 |
| 6 | -3.046723 | -2.199742 | -3.390249 |
| 6 | -3.765185 | -1.552554 | -2.218036 |
| 6 | -2.818468 | -0.666373 | -1.425633 |
| 1 | -2.020479 | -1.292964 | -0.992756 |
| 1 | -3.333998 | -0.217520 | -0.566194 |
| 1 | -4.607831 | -0.948588 | -2.592306 |
| 1 | -4.198149 | -2.315682 | -1.558004 |
| 1 | -2.267259 | -2.878894 | -3.005542 |
| 1 | -3.736816 | -2.821817 | -3.975371 |
| 1 | -3.190825 | -0.526603 | -4.734133 |
| 1 | -1.856913 | -1.614043 | -5.105042 |
| 1 | -0.609316 | -0.840645 | -3.124179 |
| 1 | -1.045743 | 0.521397  | -4.158663 |
| 1 | -2.957689 | 1.074361  | -2.697639 |
| 1 | 2.492311  | 2.361037  | -2.138388 |
| 1 | 1.586628  | 3.148452  | -0.852495 |

#### D. Dearomative pathway.

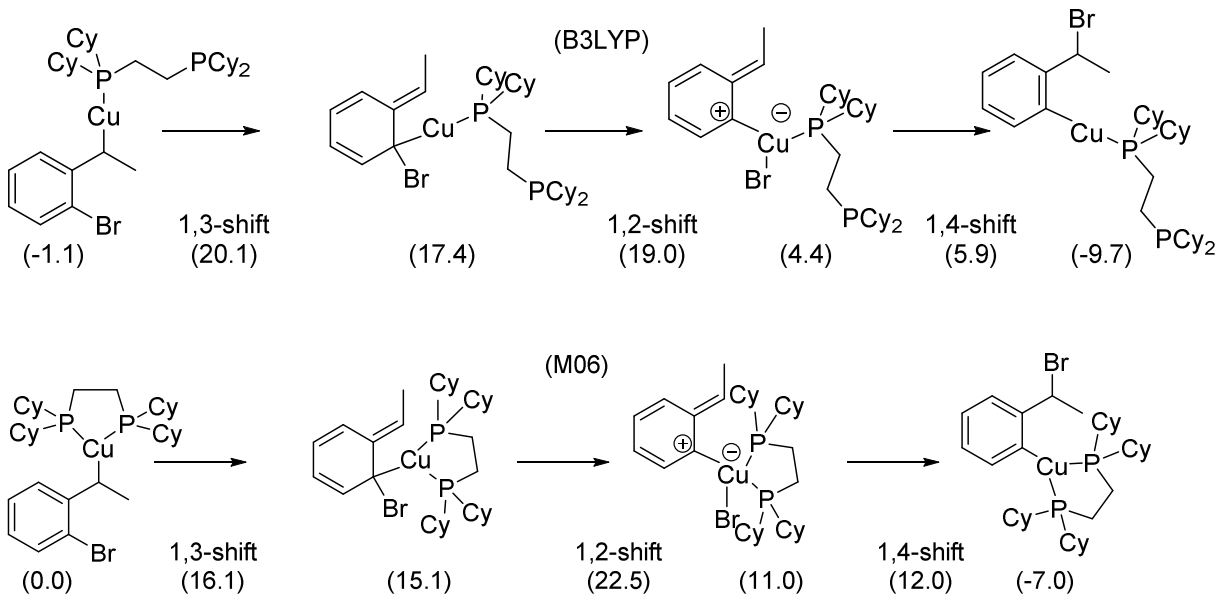

#### Computational strategy:

The computational mechanistic investigation began with the dMepc ligand system. Once all intermediates and transition state structures (TSSs) were confirmed by checking for the absence or presence of an imaginary frequency, respectively, intrinsic reaction coordinate (IRC)<sup>15</sup> calculations were performed to confirm that the intermediates of the pathway were connected to their corresponding TSSs. Then, the dCpye ligand system was optimized using various basis sets. Monodentate versus bidentate systems were also compared. Structural drawings were produced using *CYLview*.<sup>21</sup>

#### Calculated coordinates and energies (dMepc):

B3LYP/6-311G(d):LANL2DZ(Cu)

#### INT-4.1

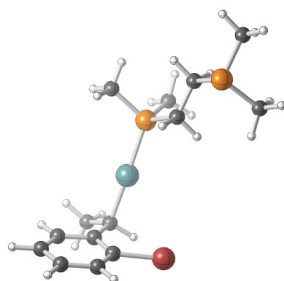

Charge = 0 Multiplicity = 1

Link 0: opt freq=noraman b3lyp/gen scrf=(smd,solvent=thf) nosymm pseudo=read

HF = -4001.1809651 hartrees (-2510781.06741 kcal/mol)

Imaginary Frequencies: none found

Zero-point correction = 0.344090 (Hartree/Particle)

Temperature 298.150 Kelvin. Pressure 1.00000 Atm.

Sum of electronic and thermal Free Energies =

-4000.895192 hartrees -2510601.74193 kcal/mol)

Coordinates (from last standard orientation):

| Center<br>Number | Atomic<br>Number | X         | Y         | Z         |
|------------------|------------------|-----------|-----------|-----------|
| 1                | 6                | 3.734716  | -1.113819 | 1.253273  |
| 2                | 6                | 3.080662  | -0.232133 | 0.352444  |
| 3                | 6                | 2.893711  | 1.074058  | 0.865475  |
| 4                | 6                | 3.278820  | 1.468559  | 2.140736  |
| 5                | 6                | 3.898473  | 0.556536  | 2.994343  |
| 6                | 6                | 4.125669  | -0.739981 | 2.532853  |
| 7                | 1                | 3.102927  | 2.487168  | 2.467784  |
| 8                | 1                | 4.201499  | 0.861942  | 3.990269  |
| 9                | 1                | 4.617699  | -1.466915 | 3.173011  |
| 10               | 6                | 2.640059  | -0.673633 | -0.983428 |
| 11               | 1                | 2.646723  | 0.172029  | -1.676265 |
| 12               | 6                | 3.418951  | -1.846431 | -1.592520 |
| 13               | 1                | 3.113043  | -2.004141 | -2.631550 |
| 14               | 1                | 4.509444  | -1.681606 | -1.601328 |
| 15               | 1                | 3.252998  | -2.799045 | -1.078653 |
| 16               | 1                | 3.929221  | -2.129679 | 0.927131  |
| 17               | 29               | 0.674282  | -1.136152 | -0.836838 |
| 18               | 15               | -1.530862 | -1.730748 | -0.700003 |
| 19               | 6                | -2.292409 | -2.208291 | -2.305539 |
| 20               | 1                | -3.321826 | -2.554774 | -2.189979 |
| 21               | 1                | -2.276690 | -1.359089 | -2.992662 |
| 22               | 1                | -1.702751 | -3.011585 | -2.753549 |
| 23               | 6                | -1.887894 | -3.181917 | 0.373626  |
| 24               | 1                | -1.576484 | -2.967260 | 1.398330  |
| 25               | 1                | -2.947162 | -3.449116 | 0.371779  |
| 26               | 1                | -1.311979 | -4.039871 | 0.019153  |
| 27               | 6                | -2.608340 | -0.370982 | -0.037280 |
| 28               | 1                | -2.230088 | -0.164384 | 0.969958  |
| 29               | 1                | -2.366424 | 0.512398  | -0.636003 |

|    |    |           |           |           |
|----|----|-----------|-----------|-----------|
| 30 | 6  | -4.120137 | -0.612827 | -0.016426 |
| 31 | 1  | -4.358173 | -1.536570 | 0.520087  |
| 32 | 1  | -4.510533 | -0.717893 | -1.033782 |
| 33 | 15 | -5.056803 | 0.752314  | 0.861918  |
| 34 | 6  | -6.792883 | 0.235576  | 0.454540  |
| 35 | 1  | -7.491151 | 1.008155  | 0.787508  |
| 36 | 1  | -6.944566 | 0.068913  | -0.616779 |
| 37 | 1  | -7.043738 | -0.684256 | 0.989638  |
| 38 | 6  | -4.851054 | 2.149607  | -0.344323 |
| 39 | 1  | -5.065405 | 1.853316  | -1.376554 |
| 40 | 1  | -5.529214 | 2.962300  | -0.069801 |
| 41 | 1  | -3.834638 | 2.547234  | -0.295671 |
| 42 | 35 | 2.049417  | 2.437086  | -0.231868 |

#### TS-4.2

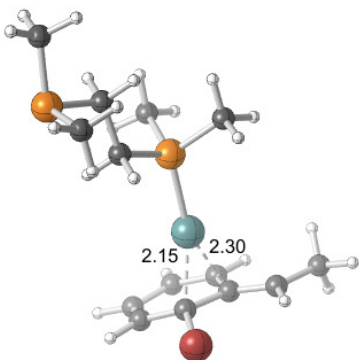

Charge = 0 Multiplicity = 1

Link 0: opt=(ts,noeigen,calcfc) freq=noraman ub3lyp/gen scrf=(smd,solvent=thf)  
guess=(mix,always) pseudo=read

HF = -4001.1475672 hartrees (-2510760.10989367 kcal/mol)

Imaginary Frequencies: 1 (-101.9708 1/cm)

Zero-point correction = 0.341926 (Hartree/Particle)

Temperature 298.150 Kelvin. Pressure 1.00000 Atm.

Sum of electronic and thermal Free Energies =

-4000.861820 hartrees (-2510580.8006682 kcal/mol)

Coordinates (from last standard orientation):

| -----  |        |                         |           |           |
|--------|--------|-------------------------|-----------|-----------|
| Center | Atomic | Coordinates (Angstroms) |           |           |
| Number | Number | X                       | Y         | Z         |
| -----  |        |                         |           |           |
| 1      | 6      | 3.503014                | -1.534399 | 0.738875  |
| 2      | 6      | 3.148242                | -0.442080 | -0.177823 |
| 3      | 6      | 2.557439                | 0.702137  | 0.539528  |

|    |    |           |           |           |
|----|----|-----------|-----------|-----------|
| 4  | 6  | 2.596647  | 0.817646  | 1.947096  |
| 5  | 6  | 3.031597  | -0.223351 | 2.743242  |
| 6  | 6  | 3.470377  | -1.412612 | 2.102459  |
| 7  | 1  | 2.258128  | 1.743999  | 2.399500  |
| 8  | 1  | 3.001926  | -0.145015 | 3.824039  |
| 9  | 1  | 3.802974  | -2.251326 | 2.709428  |
| 10 | 6  | 3.302479  | -0.546572 | -1.545579 |
| 11 | 1  | 3.099851  | 0.325382  | -2.156219 |
| 12 | 6  | 3.873341  | -1.759282 | -2.234252 |
| 13 | 1  | 3.839793  | -1.633643 | -3.320330 |
| 14 | 1  | 4.925944  | -1.957511 | -1.977316 |
| 15 | 1  | 3.330183  | -2.688691 | -2.011688 |
| 16 | 1  | 3.898559  | -2.443959 | 0.299350  |
| 17 | 29 | 0.850514  | -0.463075 | -0.041207 |
| 18 | 15 | -1.243583 | -1.263081 | -0.301099 |
| 19 | 6  | -1.696057 | -1.814033 | -1.994997 |
| 20 | 1  | -2.694970 | -2.254566 | -2.030480 |
| 21 | 1  | -1.654449 | -0.966913 | -2.683252 |
| 22 | 1  | -0.972210 | -2.558181 | -2.334010 |
| 23 | 6  | -1.573100 | -2.745345 | 0.734386  |
| 24 | 1  | -1.456515 | -2.491426 | 1.790218  |
| 25 | 1  | -2.575772 | -3.146392 | 0.571465  |
| 26 | 1  | -0.842545 | -3.519876 | 0.491377  |
| 27 | 6  | -2.542614 | -0.028142 | 0.176962  |
| 28 | 1  | -2.287262 | 0.291698  | 1.192351  |
| 29 | 1  | -2.369615 | 0.841008  | -0.465398 |
| 30 | 6  | -4.002034 | -0.485125 | 0.104635  |
| 31 | 1  | -4.161914 | -1.352910 | 0.751739  |
| 32 | 1  | -4.273097 | -0.783594 | -0.913231 |
| 33 | 15 | -5.196940 | 0.829797  | 0.701143  |
| 34 | 6  | -6.796761 | -0.052998 | 0.373627  |
| 35 | 1  | -7.631751 | 0.633483  | 0.537560  |
| 36 | 1  | -6.863094 | -0.443368 | -0.646965 |
| 37 | 1  | -6.913895 | -0.884051 | 1.074116  |
| 38 | 6  | -5.180384 | 2.000372  | -0.741049 |
| 39 | 1  | -5.313874 | 1.489301  | -1.700134 |
| 40 | 1  | -5.986501 | 2.729519  | -0.622140 |
| 41 | 1  | -4.241404 | 2.558526  | -0.768164 |
| 42 | 35 | 2.339180  | 2.399418  | -0.440575 |

### INT-4.3

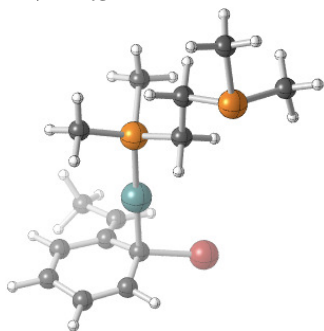

Charge = 0 Multiplicity = 1

Link 0: opt freq=noraman b3lyp/gen scrf=(smd,solvent=thf) nosymm pseudo=read  
HF = -4001.1515178 hartrees (-2510549.59209 kcal/mol)  
Imaginary Frequencies: none found  
Zero-point correction = 0.342264 (Hartree/Particle)

Temperature 298.150 Kelvin. Pressure 1.00000 Atm.  
Sum of electronic and thermal Free Energies =  
-4000.867494 hartrees (-2510584.36116 kcal/mol)

Coordinates (from last standard orientation):

| -----  |        |                         |           |           |
|--------|--------|-------------------------|-----------|-----------|
| Center | Atomic | Coordinates (Angstroms) |           |           |
| Number | Number | X                       | Y         | Z         |
| -----  |        |                         |           |           |
| 1      | 6      | 3.733719                | -1.648421 | 0.556733  |
| 2      | 6      | 3.448435                | -0.526505 | -0.352034 |
| 3      | 6      | 2.560187                | 0.482990  | 0.280379  |
| 4      | 6      | 2.543724                | 0.602446  | 1.718778  |
| 5      | 6      | 2.991419                | -0.409861 | 2.523781  |
| 6      | 6      | 3.547370                | -1.577171 | 1.903075  |
| 7      | 1      | 2.101407                | 1.492510  | 2.154471  |
| 8      | 1      | 2.879667                | -0.354177 | 3.601216  |
| 9      | 1      | 3.848637                | -2.415777 | 2.526011  |
| 10     | 6      | 3.939633                | -0.492574 | -1.620933 |
| 11     | 1      | 3.713578                | 0.370380  | -2.237629 |
| 12     | 6      | 4.747444                | -1.591617 | -2.263397 |
| 13     | 1      | 5.155802                | -1.256802 | -3.221095 |
| 14     | 1      | 5.601430                | -1.916136 | -1.655391 |
| 15     | 1      | 4.160993                | -2.498584 | -2.476442 |
| 16     | 1      | 4.221417                | -2.522315 | 0.137084  |
| 17     | 29     | 0.692502                | -0.320190 | 0.050868  |
| 18     | 15     | -1.394651               | -1.188580 | -0.203179 |
| 19     | 6      | -1.787208               | -1.751344 | -1.907937 |
| 20     | 1      | -2.776165               | -2.210397 | -1.973851 |
| 21     | 1      | -1.738972               | -0.905342 | -2.597182 |





| Number | Number | X         | Y         | Z         |
|--------|--------|-----------|-----------|-----------|
| 1      | 6      | -4.635887 | 0.838368  | 0.642636  |
| 2      | 6      | -3.577803 | 0.269657  | -0.196711 |
| 3      | 6      | -2.546362 | -0.563195 | 0.523041  |
| 4      | 6      | -2.773296 | -0.828702 | 1.938606  |
| 5      | 6      | -3.737244 | -0.199697 | 2.658272  |
| 6      | 6      | -4.696421 | 0.639627  | 1.980108  |
| 7      | 1      | -2.093574 | -1.516660 | 2.432078  |
| 8      | 1      | -3.801466 | -0.332799 | 3.733963  |
| 9      | 1      | -5.508528 | 1.079137  | 2.553056  |
| 10     | 6      | -3.515225 | 0.500672  | -1.535601 |
| 11     | 6      | -4.447332 | 1.309531  | -2.386017 |
| 12     | 1      | -5.239520 | 1.809511  | -1.827146 |
| 13     | 1      | -3.901495 | 2.086218  | -2.938667 |
| 14     | 1      | -4.931425 | 0.685897  | -3.149629 |
| 15     | 1      | -5.426234 | 1.403241  | 0.160318  |
| 16     | 29     | -0.698994 | 0.222487  | 0.384695  |
| 17     | 15     | 1.367823  | 1.148033  | 0.247004  |
| 18     | 6      | 1.642282  | 2.184802  | -1.246622 |
| 19     | 1      | 2.630526  | 2.649507  | -1.252317 |
| 20     | 1      | 1.529336  | 1.575427  | -2.146047 |
| 21     | 1      | 0.885161  | 2.971704  | -1.276060 |
| 22     | 6      | 1.762793  | 2.290144  | 1.632226  |
| 23     | 1      | 1.770679  | 1.737856  | 2.574707  |
| 24     | 1      | 2.727451  | 2.784957  | 1.498930  |
| 25     | 1      | 0.984678  | 3.054049  | 1.695331  |
| 26     | 6      | 2.742957  | -0.097437 | 0.237087  |
| 27     | 1      | 2.577123  | -0.729834 | 1.115207  |
| 28     | 1      | 2.551694  | -0.734463 | -0.632148 |
| 29     | 6      | 4.176475  | 0.440524  | 0.224795  |
| 30     | 1      | 4.359499  | 1.051884  | 1.113545  |
| 31     | 1      | 4.355520  | 1.074115  | -0.650053 |
| 32     | 15     | 5.457164  | -0.927706 | 0.266480  |
| 33     | 6      | 6.998576  | 0.101003  | 0.159900  |
| 34     | 1      | 7.861754  | -0.552520 | 0.008433  |
| 35     | 1      | 6.968164  | 0.830380  | -0.655951 |
| 36     | 1      | 7.152836  | 0.636323  | 1.100563  |
| 37     | 6      | 5.365410  | -1.541688 | -1.483402 |
| 38     | 1      | 5.399159  | -0.730795 | -2.218305 |
| 39     | 1      | 6.203526  | -2.217713 | -1.673190 |
| 40     | 1      | 4.447648  | -2.114963 | -1.635567 |
| 41     | 35     | -2.319955 | -2.466554 | -0.394188 |
| 42     | 1      | -2.710579 | 0.013399  | -2.082969 |

## INT-4.5

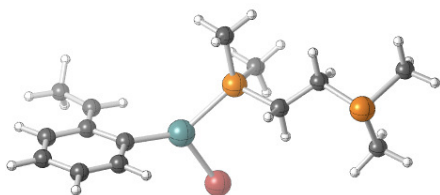

Charge = 0 Multiplicity = 1

Link 0: opt freq=noraman b3lyp/gen scrf=(smd,solvent=thf) pseudo=read nosymm

HF = -4001.1731892 hartrees (-2510776.18795 kcal/mol)

Imaginary Frequencies: none found

Zero-point correction = 0.344078 (Hartree/Particle)

Temperature 298.150 Kelvin. Pressure 1.00000 Atm.

Sum of electronic and thermal Free Energies =

-4000.888588 hartrees (-2510597.59786 kcal/mol)

Coordinates (from last standard orientation):

| Center<br>Number | Atomic<br>Number | Coordinates (Angstroms) |           |           |
|------------------|------------------|-------------------------|-----------|-----------|
|                  |                  | X                       | Y         | Z         |
| 1                | 6                | -5.215635               | -1.027610 | -0.487594 |
| 2                | 6                | -3.998209               | -0.560293 | 0.135318  |
| 3                | 6                | -2.753780               | -0.423196 | -0.617872 |
| 4                | 6                | -2.849016               | -0.781404 | -1.986124 |
| 5                | 6                | -4.024542               | -1.221550 | -2.565465 |
| 6                | 6                | -5.222683               | -1.350210 | -1.812198 |
| 7                | 1                | -1.967514               | -0.704231 | -2.616885 |
| 8                | 1                | -4.042536               | -1.476535 | -3.621859 |
| 9                | 1                | -6.127997               | -1.701339 | -2.295203 |
| 10               | 6                | -3.965345               | -0.221077 | 1.472226  |
| 11               | 6                | -5.047981               | -0.236486 | 2.473933  |
| 12               | 1                | 5.153371                | 0.771068  | 2.897620  |
| 13               | 1                | -6.016488               | -0.570003 | 2.106761  |
| 14               | 1                | -4.746738               | -0.868224 | 3.319875  |
| 15               | 1                | -6.124556               | -1.123540 | 0.095216  |
| 16               | 35               | -0.323239               | 2.685081  | 0.053444  |
| 17               | 29               | -1.040393               | 0.238092  | 0.100241  |
| 18               | 15               | 0.926123                | -0.696547 | 1.007036  |
| 19               | 6                | 1.496407                | 0.077054  | 2.578210  |
| 20               | 1                | 2.418415                | -0.371673 | 2.954863  |
| 21               | 1                | 1.651621                | 1.145503  | 2.417857  |
| 22               | 1                | 0.719439                | -0.036099 | 3.338637  |
| 23               | 6                | 0.968525                | -2.495418 | 1.418462  |
| 24               | 1                | 0.799399                | -3.084311 | 0.513572  |

|    |    |           |           |           |
|----|----|-----------|-----------|-----------|
| 25 | 1  | 1.913604  | -2.805378 | 1.871792  |
| 26 | 1  | 0.159877  | -2.721282 | 2.118301  |
| 27 | 6  | 2.348256  | -0.467134 | -0.167948 |
| 28 | 1  | 2.060637  | -0.988481 | -1.087620 |
| 29 | 1  | 2.340708  | 0.599229  | -0.410796 |
| 30 | 6  | 3.736268  | -0.919397 | 0.292582  |
| 31 | 1  | 3.733294  | -1.989560 | 0.522932  |
| 32 | 1  | 4.041208  | -0.391115 | 1.201909  |
| 33 | 15 | 5.045409  | -0.671275 | -1.025051 |
| 34 | 6  | 6.549312  | -1.173298 | -0.058154 |
| 35 | 1  | 7.447421  | -0.974973 | -0.649330 |
| 36 | 1  | 6.635341  | -0.639409 | 0.893699  |
| 37 | 1  | 6.520385  | -2.247369 | 0.144221  |
| 38 | 6  | 5.243320  | 1.174261  | -0.974576 |
| 39 | 1  | 5.354059  | 1.556676  | 0.045463  |
| 40 | 1  | 6.128526  | 1.458885  | -1.550134 |
| 41 | 1  | 4.383606  | 1.662883  | -1.439050 |
| 42 | 1  | -2.996444 | 0.112595  | 1.840185  |

#### TS-4.6

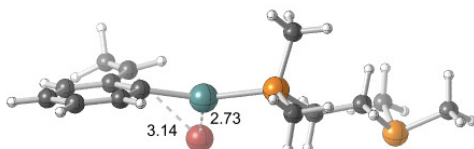

Charge = 0 Multiplicity = 1

Link 0: opt=(calcfc,ts,noeigen) freq=noraman ub3lyp/gen scrf=(smd,solvent=thf)  
pseudo=read

HF = -4001.1685731 hartrees (-2510773.29130598 kcal/mol)

Imaginary Frequencies: 1 (-61.6907 1/cm)

Zero-point correction = 0.342951 (Hartree/Particle)

Temperature 298.150 Kelvin. Pressure 1.00000 Atm.

Sum of electronic and thermal Free Energies =

-4000.884245 hartrees (-2510594.87257995 kcal/mol)

Coordinates (from last standard orientation):

| -----  |        |                         |           |           |
|--------|--------|-------------------------|-----------|-----------|
| Center | Atomic | Coordinates (Angstroms) |           |           |
| Number | Number | X                       | Y         | Z         |
| -----  |        |                         |           |           |
| 1      | 6      | -5.171258               | 0.244775  | 0.189421  |
| 2      | 6      | -3.761738               | 0.264419  | 0.442459  |
| 3      | 6      | -2.909090               | -0.852152 | 0.094907  |
| 4      | 6      | -3.580420               | -1.976140 | -0.423806 |

|    |    |           |           |           |
|----|----|-----------|-----------|-----------|
| 5  | 6  | -4.952909 | -1.989853 | -0.655848 |
| 6  | 6  | -5.757280 | -0.873526 | -0.350961 |
| 7  | 1  | -3.012561 | -2.864554 | -0.688169 |
| 8  | 1  | -5.417371 | -2.871096 | -1.090980 |
| 9  | 1  | -6.825827 | -0.905448 | -0.534386 |
| 10 | 6  | -3.172955 | 1.355553  | 1.088322  |
| 11 | 6  | -3.820113 | 2.607324  | 1.531193  |
| 12 | 1  | -3.126148 | 3.443508  | 1.421126  |
| 13 | 1  | -4.755414 | 2.842298  | 1.025368  |
| 14 | 1  | -4.022169 | 2.526685  | 2.610165  |
| 15 | 1  | -5.786932 | 1.096424  | 0.455980  |
| 16 | 35 | -0.773219 | 1.958296  | -0.848367 |
| 17 | 29 | -0.927463 | -0.633550 | -0.013755 |
| 18 | 15 | 1.231372  | -1.414290 | 0.238624  |
| 19 | 6  | 1.628291  | -1.940991 | 1.959643  |
| 20 | 1  | 2.616769  | -2.398918 | 2.043181  |
| 21 | 1  | 1.578768  | -1.079506 | 2.630189  |
| 22 | 1  | 0.879864  | -2.664285 | 2.291497  |
| 23 | 6  | 1.620653  | -2.928010 | -0.737948 |
| 24 | 1  | 1.513224  | -2.714936 | -1.804103 |
| 25 | 1  | 2.631094  | -3.299696 | -0.550955 |
| 26 | 1  | 0.907796  | -3.714605 | -0.479770 |
| 27 | 6  | 2.581290  | -0.220891 | -0.211749 |
| 28 | 1  | 2.443880  | -0.015852 | -1.278505 |
| 29 | 1  | 2.329197  | 0.711959  | 0.299844  |
| 30 | 6  | 4.023754  | -0.638646 | 0.085549  |
| 31 | 1  | 4.259992  | -1.590580 | -0.400704 |
| 32 | 1  | 4.177005  | -0.776327 | 1.161105  |
| 33 | 15 | 5.279205  | 0.596365  | -0.554570 |
| 34 | 6  | 6.826158  | -0.163061 | 0.138461  |
| 35 | 1  | 7.671994  | 0.507987  | -0.034253 |
| 36 | 1  | 6.755427  | -0.362437 | 1.212720  |
| 37 | 1  | 7.043842  | -1.102143 | -0.377305 |
| 38 | 6  | 5.043729  | 1.986179  | 0.654681  |
| 39 | 1  | 5.036313  | 1.640651  | 1.693750  |
| 40 | 1  | 5.854588  | 2.710121  | 0.535911  |
| 41 | 1  | 4.107565  | 2.511804  | 0.452397  |
| 42 | 1  | -2.149122 | 1.220548  | 1.410883  |

#### INT-4.7

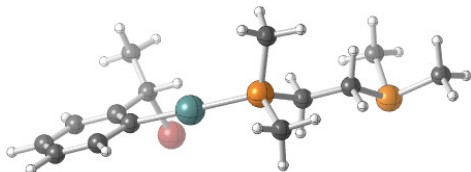

Charge = 0 Multiplicity = 1

Link 0: opt freq=noraman b3lyp/gen scrf=(smd,solvent=thf) pseudo=read nosymm  
HF = -4001.1927182 hartrees (-2510788.4426 kcal/mol)  
Imaginary Frequencies: none found  
Zero-point correction = 0.345433 (Hartree/Particle)

Temperature 298.150 Kelvin. Pressure 1.00000 Atm.  
Sum of electronic and thermal Free Energies =  
-4000.905147 hartrees (-2510607.98879 kcal/mol)

Coordinates (from last standard orientation):

---

| Center<br>Number | Atomic<br>Number | Coordinates (Angstroms) |           |           |
|------------------|------------------|-------------------------|-----------|-----------|
|                  |                  | X                       | Y         | Z         |
| 1                | 6                | -4.485007               | 0.587590  | -0.141465 |
| 2                | 6                | -3.122445               | 0.322517  | 0.070819  |
| 3                | 6                | -2.586537               | -0.978636 | -0.093422 |
| 4                | 6                | -3.508658               | -1.981173 | -0.466263 |
| 5                | 6                | -4.863857               | -1.724754 | -0.678613 |
| 6                | 6                | -5.356053               | -0.428685 | -0.517988 |
| 7                | 1                | -3.159784               | -3.003543 | -0.601435 |
| 8                | 1                | -5.534261               | -2.529161 | -0.971431 |
| 9                | 1                | -6.407428               | -0.212801 | -0.684155 |
| 10               | 6                | -2.213747               | 1.428060  | 0.525677  |
| 11               | 6                | -2.694131               | 2.288311  | 1.679852  |
| 12               | 1                | -1.946078               | 3.032512  | 1.959330  |
| 13               | 1                | -3.627082               | 2.808320  | 1.456014  |
| 14               | 1                | -2.870576               | 1.642232  | 2.547555  |
| 15               | 1                | -4.870367               | 1.596888  | -0.026629 |
| 16               | 35               | -1.781316               | 2.701077  | -1.050802 |
| 17               | 29               | -0.676049               | -1.418401 | 0.156550  |
| 18               | 15               | 1.522779                | -1.926362 | 0.472747  |
| 19               | 6                | 1.949554                | -2.366658 | 2.208147  |
| 20               | 1                | 2.993881                | -2.667364 | 2.317722  |
| 21               | 1                | 1.752799                | -1.515935 | 2.864793  |
| 22               | 1                | 1.313384                | -3.193429 | 2.532492  |
| 23               | 6                | 2.137468                | -3.372404 | -0.482559 |
| 24               | 1                | 2.053226                | -3.170604 | -1.552862 |
| 25               | 1                | 3.175752                | -3.616260 | -0.246604 |
| 26               | 1                | 1.515525                | -4.241379 | -0.255671 |
| 27               | 6                | 2.674518                | -0.539902 | 0.028942  |
| 28               | 1                | 2.476453                | -0.319880 | -1.025547 |
| 29               | 1                | 2.318281                | 0.330288  | 0.589194  |
| 30               | 6                | 4.170352                | -0.765256 | 0.266150  |
| 31               | 1                | 4.511164                | -1.661552 | -0.261323 |
| 32               | 1                | 4.379515                | -0.914740 | 1.330660  |

|    |    |           |           |           |
|----|----|-----------|-----------|-----------|
| 33 | 15 | 5.220709  | 0.643737  | -0.383300 |
| 34 | 6  | 6.885103  | 0.076226  | 0.211309  |
| 35 | 1  | 7.625490  | 0.857733  | 0.020341  |
| 36 | 1  | 6.895554  | -0.157740 | 1.280707  |
| 37 | 1  | 7.196294  | -0.812665 | -0.343967 |
| 38 | 6  | 4.867168  | 1.958674  | 0.879597  |
| 39 | 1  | 4.945259  | 1.587412  | 1.906734  |
| 40 | 1  | 5.578635  | 2.779307  | 0.752386  |
| 41 | 1  | 3.867014  | 2.372213  | 0.729711  |
| 42 | 1  | -1.225643 | 1.020289  | 0.726581  |

**Calculated coordinates and energies (dMepe, monodentate):**  
 B3LYP/6-311G(d):LANL2TZ+(Cu)

**INT-4.1**

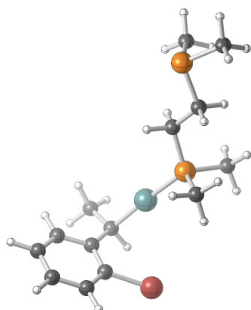

Charge = 0 Multiplicity = 1

Link 0: opt freq=noraman m06/gen pseudo=read scrf=(smd,solvent=thf)

HF = -4000.5879638 hartrees (-2510408.95316414 kcal/mol)

Imaginary Frequencies: none found

Zero-point correction = 0.343012 (Hartree/Particle)

Temperature 298.150 Kelvin. Pressure 1.00000 Atm.

Sum of electronic and thermal Free Energies =

-4000.301292 hartrees (-2510229.06374292 kcal/mol)

Coordinates (from last standard orientation):

| -----  |        |                         |           |           |
|--------|--------|-------------------------|-----------|-----------|
| Center | Atomic | Coordinates (Angstroms) |           |           |
| Number | Number | X                       | Y         | Z         |
| -----  |        |                         |           |           |
| 1      | 6      | 3.050432                | 2.423753  | -0.111951 |
| 2      | 6      | 2.882329                | 1.083735  | 0.296553  |
| 3      | 6      | 3.342452                | 0.131739  | -0.636477 |
| 4      | 6      | 3.899941                | 0.463220  | -1.858632 |
| 5      | 6      | 4.031251                | 1.797404  | -2.222677 |
| 6      | 6      | 3.599450                | 2.773464  | -1.334545 |
| 7      | 1      | 4.233097                | -0.324536 | -2.530888 |

|    |    |           |           |           |
|----|----|-----------|-----------|-----------|
| 8  | 1  | 4.467349  | 2.061721  | -3.182971 |
| 9  | 1  | 3.697507  | 3.826583  | -1.593329 |
| 10 | 6  | 2.257257  | 0.730871  | 1.577186  |
| 11 | 6  | 2.176726  | 1.842231  | 2.606768  |
| 12 | 1  | 1.804513  | 1.453989  | 3.562441  |
| 13 | 1  | 3.152042  | 2.319002  | 2.813646  |
| 14 | 1  | 1.491189  | 2.651061  | 2.319748  |
| 15 | 1  | 2.730198  | 3.215208  | 0.562535  |
| 16 | 35 | 3.175603  | -1.738801 | -0.244307 |
| 17 | 1  | 2.750068  | -0.154582 | 2.002740  |
| 18 | 29 | 0.493058  | 0.007937  | 1.072309  |
| 19 | 15 | -1.410028 | -0.869996 | 0.290911  |
| 20 | 6  | -2.798047 | 0.311308  | 0.036800  |
| 21 | 1  | -2.996398 | 0.753782  | 1.023212  |
| 22 | 1  | -2.396635 | 1.125443  | -0.583113 |
| 23 | 6  | -4.066937 | -0.255917 | -0.571782 |
| 24 | 1  | -4.491048 | -1.051984 | 0.058126  |
| 25 | 1  | -3.864177 | -0.694921 | -1.558127 |
| 26 | 15 | -5.361465 | 1.054939  | -0.833565 |
| 27 | 6  | -6.749790 | -0.046426 | -1.344838 |
| 28 | 1  | -6.912711 | -0.867963 | -0.634632 |
| 29 | 1  | -7.676730 | 0.532732  | -1.420887 |
| 30 | 1  | -6.548036 | -0.475119 | -2.332693 |
| 31 | 6  | -5.859608 | 1.332504  | 0.921574  |
| 32 | 1  | -6.800442 | 1.893383  | 0.951440  |
| 33 | 1  | -6.001043 | 0.388267  | 1.464413  |
| 34 | 1  | -5.110145 | 1.931984  | 1.448844  |
| 35 | 6  | -2.138769 | -2.222085 | 1.277681  |
| 36 | 1  | -2.487662 | -1.840323 | 2.242899  |
| 37 | 1  | -2.975314 | -2.702823 | 0.759296  |
| 38 | 1  | -1.371740 | -2.978601 | 1.472882  |
| 39 | 6  | -1.170229 | -1.656605 | -1.339000 |
| 40 | 1  | -0.880751 | -0.902168 | -2.078059 |
| 41 | 1  | -0.355103 | -2.384376 | -1.266990 |
| 42 | 1  | -2.069148 | -2.177224 | -1.686910 |

**Calculated coordinates and energies (dMepe, bidentate):**  
 B3LYP/6-311G(d):LANL2TZ+(Cu)

**INT-4.1**

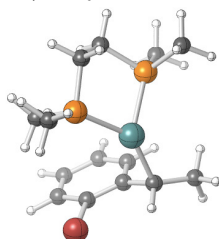



Charge = 0 Multiplicity = 1

Link 0: opt freq=noraman m06/gen pseudo=read scrf=(smd,solvent=thf)

HF = -4000.5981925 hartrees (-2510415.37177568 kcal/mol)

Imaginary Frequencies: none found

Zero-point correction = 0.343221 (Hartree/Particle)

Temperature 298.150 Kelvin. Pressure 1.00000 Atm.

Sum of electronic and thermal Free Energies =

-4000.308255 hartrees (-2510233.43309505 kcal/mol)

Coordinates (from last standard orientation):

| -----  |        |                         |           |           |
|--------|--------|-------------------------|-----------|-----------|
| Center | Atomic | Coordinates (Angstroms) |           |           |
| Number | Number | X                       | Y         | Z         |
| -----  |        |                         |           |           |
| 1      | 6      | -0.899988               | 2.414336  | 0.636725  |
| 2      | 6      | -1.379043               | 1.397569  | -0.230889 |
| 3      | 6      | -2.326482               | 0.532635  | 0.369875  |
| 4      | 6      | -2.737174               | 0.643778  | 1.686318  |
| 5      | 6      | -2.224785               | 1.646641  | 2.501065  |
| 6      | 6      | -1.301105               | 2.531970  | 1.955036  |
| 7      | 1      | -3.469320               | -0.059070 | 2.079482  |
| 8      | 1      | -2.550670               | 1.734671  | 3.534520  |
| 9      | 1      | -0.890725               | 3.335620  | 2.565406  |
| 10     | 6      | -0.866514               | 1.249275  | -1.584136 |
| 11     | 6      | -0.328236               | 2.490726  | -2.264338 |
| 12     | 1      | -0.057407               | 2.267620  | -3.303755 |
| 13     | 1      | -1.052161               | 3.326181  | -2.297450 |
| 14     | 1      | 0.583960                | 2.889053  | -1.797624 |
| 15     | 1      | -0.174021               | 3.124173  | 0.242844  |
| 16     | 35     | -3.097075               | -0.897402 | -0.649756 |
| 17     | 1      | -1.564896               | 0.702781  | -2.224407 |
| 18     | 29     | 0.586526                | 0.015701  | -0.905147 |
| 19     | 15     | 0.911425                | -1.968792 | 0.218778  |
| 20     | 6      | 2.687964                | -1.959749 | 0.736752  |
| 21     | 1      | 2.850015                | -2.709638 | 1.524186  |
| 22     | 1      | 3.279856                | -2.276875 | -0.133755 |
| 23     | 6      | 3.115235                | -0.573230 | 1.200194  |
| 24     | 1      | 4.192856                | -0.536898 | 1.413489  |
| 25     | 1      | 2.599629                | -0.305611 | 2.133593  |
| 26     | 15     | 2.680696                | 0.730859  | -0.042447 |
| 27     | 6      | 3.082063                | 2.255661  | 0.887428  |
| 28     | 1      | 4.099288                | 2.220730  | 1.298446  |
| 29     | 1      | 3.000281                | 3.126292  | 0.227892  |
| 30     | 1      | 2.372172                | 2.388433  | 1.710905  |
| 31     | 6      | 4.093705                | 0.620173  | -1.203420 |

|    |   |           |           |           |
|----|---|-----------|-----------|-----------|
| 32 | 1 | 4.027238  | 1.421236  | -1.947221 |
| 33 | 1 | 5.053735  | 0.703025  | -0.678432 |
| 34 | 1 | 4.064326  | -0.333150 | -1.741873 |
| 35 | 6 | 0.648796  | -3.732629 | -0.183539 |
| 36 | 1 | 1.229698  | -4.010893 | -1.068697 |
| 37 | 1 | 0.941966  | -4.380216 | 0.652225  |
| 38 | 1 | -0.409089 | -3.907674 | -0.406480 |
| 39 | 6 | 0.061915  | -1.823062 | 1.835869  |
| 40 | 1 | 0.152930  | -0.802197 | 2.224281  |
| 41 | 1 | -1.005315 | -2.033942 | 1.708568  |
| 42 | 1 | 0.474119  | -2.525503 | 2.571995  |

#### TS-4.4

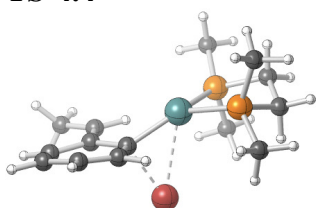

Charge = 0 Multiplicity = 1

Link 0: opt=(calcfc,ts,noeigen) freq=noraman m06/gen scrf=(solvent=thf,smd)  
pseudo=read

HF = -4000.5616798 hartrees (-2510392.4596913 kcal/mol)

Imaginary Frequencies: 1 (-37.5302 1/cm)

Zero-point correction = 0.341291 (Hartree/Particle)

Temperature 298.150 Kelvin. Pressure 1.00000 Atm.

Sum of electronic and thermal Free Energies =

-4000.274584 hartrees (-2510212.30420584 kcal/mol)

Coordinates (from last standard orientation):

25 - 3 Br C distance = 2.167

25 - 16 Br Cu distance = 2.842

Valence > maximum for atom=25 type=Br valence=2 max=1

| Center<br>Number | Atomic<br>Number | Coordinates (Angstroms) |           |           |
|------------------|------------------|-------------------------|-----------|-----------|
|                  |                  | X                       | Y         | Z         |
| 1                | 6                | 3.988043                | -0.024314 | -0.834670 |
| 2                | 6                | 2.673898                | 0.497384  | -0.493834 |
| 3                | 6                | 1.582886                | -0.487961 | -0.254976 |
| 4                | 6                | 1.904229                | -1.878054 | -0.519001 |
| 5                | 6                | 3.096014                | -2.273580 | -1.022609 |
| 6                | 6                | 4.176027                | -1.328536 | -1.123822 |
| 7                | 1                | 1.123583                | -2.615479 | -0.323642 |
| 8                | 1                | 3.263164                | -3.311685 | -1.305172 |

|    |    |           |           |           |
|----|----|-----------|-----------|-----------|
| 9  | 1  | 5.166448  | -1.688227 | -1.399978 |
| 10 | 6  | 2.455981  | 1.830227  | -0.412537 |
| 11 | 6  | 3.489233  | 2.892732  | -0.582654 |
| 12 | 1  | 3.048303  | 3.891770  | -0.511184 |
| 13 | 1  | 4.280545  | 2.838569  | 0.179951  |
| 14 | 1  | 3.996315  | 2.833785  | -1.555573 |
| 15 | 1  | 4.836233  | 0.659143  | -0.850714 |
| 16 | 29 | -0.343270 | -0.058438 | -0.537951 |
| 17 | 15 | -2.219153 | -1.442207 | -0.403818 |
| 18 | 6  | -3.395191 | -0.327076 | 0.493992  |
| 19 | 1  | -4.401323 | -0.769537 | 0.495743  |
| 20 | 1  | -3.061072 | -0.295670 | 1.541764  |
| 21 | 6  | -3.406867 | 1.073276  | -0.106581 |
| 22 | 1  | -4.073072 | 1.743574  | 0.454594  |
| 23 | 1  | -3.781543 | 1.045411  | -1.139939 |
| 24 | 15 | -1.699303 | 1.787824  | -0.162581 |
| 25 | 35 | 1.112689  | -0.511313 | 1.860655  |
| 26 | 1  | 1.443104  | 2.151132  | -0.157976 |
| 27 | 6  | -1.959887 | 3.325282  | -1.118123 |
| 28 | 1  | -2.782837 | 3.918498  | -0.700623 |
| 29 | 1  | -1.046494 | 3.929532  | -1.099131 |
| 30 | 1  | -2.186118 | 3.089774  | -2.162800 |
| 31 | 6  | -1.515760 | 2.440821  | 1.537329  |
| 32 | 1  | -0.563610 | 2.974655  | 1.629023  |
| 33 | 1  | -2.332769 | 3.127964  | 1.791352  |
| 34 | 1  | -1.497250 | 1.618639  | 2.259301  |
| 35 | 6  | -2.300308 | -2.954940 | 0.618899  |
| 36 | 1  | -1.771331 | -3.772150 | 0.117120  |
| 37 | 1  | -1.808767 | -2.778531 | 1.581685  |
| 38 | 1  | -3.336691 | -3.266841 | 0.799555  |
| 39 | 6  | -3.207085 | -1.924953 | -1.868828 |
| 40 | 1  | -2.685675 | -2.711526 | -2.424129 |
| 41 | 1  | -4.197643 | -2.297040 | -1.578210 |
| 42 | 1  | -3.331243 | -1.071233 | -2.542903 |

### **Intrinsic Reaction Coordinates:**

Intrinsic reaction coordinate (IRC) calculations were performed for the dMepe ligand system using Gaussian03<sup>S10A</sup> at the SMD(THF)-B3LYP/6-311G(d):LANL2DZ (Cu) level of theory. To confirm minima and TSSs are connected for the dCype ligand system,

SMD(THF)-B3LYP/6-311G(d):LANL2TZ (Cu) level of theory was used in the Gaussian09 suite<sup>S10B</sup>. The manual displacement option was used under the “Vibrations” tab in GaussView 5.0 to optimize the 2 structures resulting from the vibration. This led to reactants and products, which provided support that the TSS found was in fact the correct one.

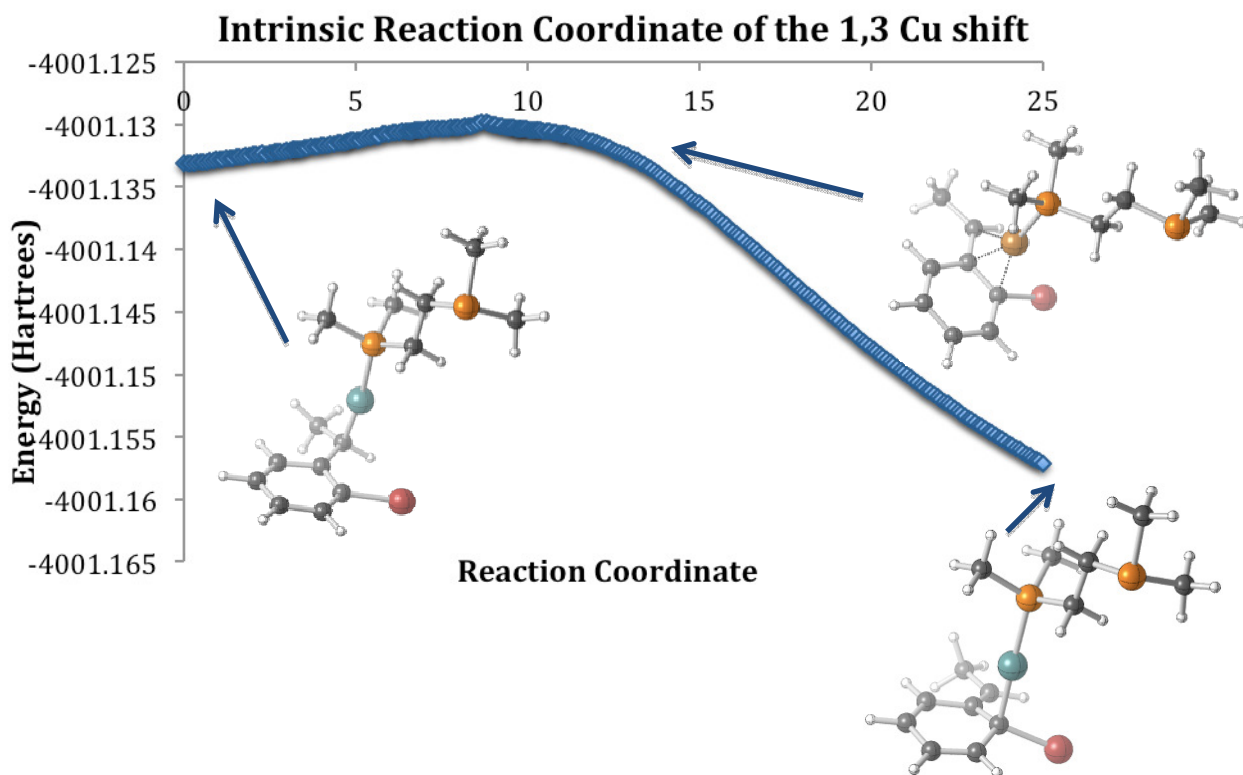

### Intrinsic Reaction Coordinate of the 1,2 Br shift

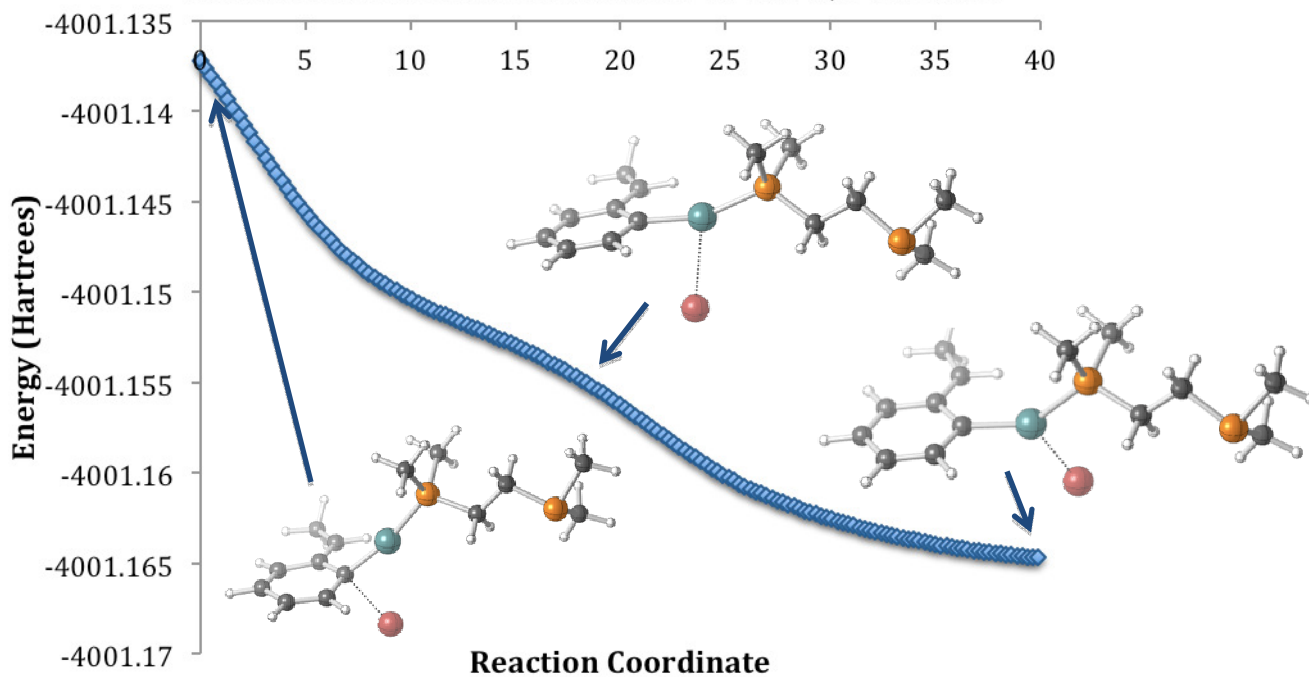

### Intrinsic Reaction Coordinate of the 1,4 Br shift

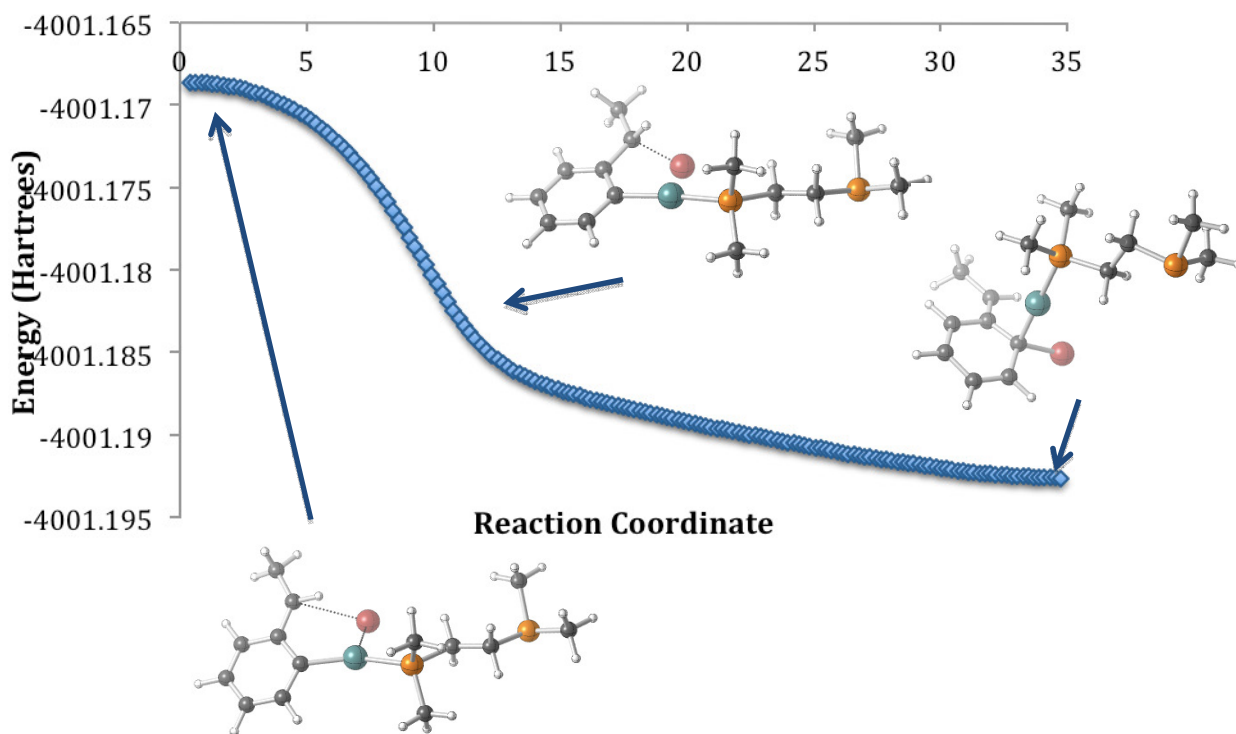

**Calculated coordinates and energies (dCype, monodentate):**  
B3LYP/6-311G(d):LANL2TZ(Cu)

**INT-4.1:**

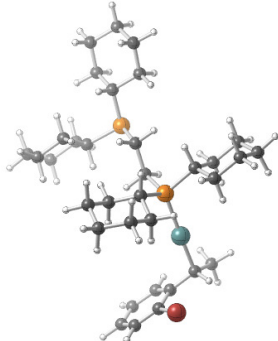

Charge = 0 Multiplicity = 1

Link 0: opt freq=noraman b3lyp/gen scrf=(solvent=thf,smd) pseudo=read scf=tight  
HF = -4782.8070065 hartrees (-3001259.22464882 kcal/mol)  
Imaginary Frequencies: none found  
Zero-point correction = 0.836912 (Hartree/Particle)

Temperature 298.150 Kelvin. Pressure 1.00000 Atm.  
Sum of electronic and thermal Free Energies =  
-4782.049880 hartrees (-3000784.1201988 kcal/mol)

Coordinates (from last standard orientation):  
atom 25 is isolated, type=P

| Center Number | Atomic Number | Coordinates (Angstroms) |           |           |
|---------------|---------------|-------------------------|-----------|-----------|
|               |               | X                       | Y         | Z         |
| 1             | 6             | 3.995305                | -2.284279 | -2.412048 |
| 2             | 6             | 4.386447                | -1.170365 | -1.623439 |
| 3             | 6             | 5.174318                | -1.513667 | -0.499164 |
| 4             | 6             | 5.516043                | -2.817491 | -0.161072 |
| 5             | 6             | 5.086486                | -3.878451 | -0.957325 |
| 6             | 6             | 4.325123                | -3.595238 | -2.091367 |
| 7             | 1             | 6.123349                | -3.006740 | 0.716944  |
| 8             | 1             | 5.353355                | -4.897309 | -0.697198 |
| 9             | 1             | 3.988851                | -4.401916 | -2.736719 |
| 10            | 6             | 3.981614                | 0.206512  | -1.969631 |
| 11            | 1             | 4.726656                | 0.915025  | -1.597563 |
| 12            | 6             | 3.722715                | 0.470107  | -3.459396 |
| 13            | 1             | 3.568164                | 1.539891  | -3.631962 |
| 14            | 1             | 4.561919                | 0.159536  | -4.103852 |
| 15            | 1             | 2.830003                | -0.031874 | -3.846221 |

|    |    |           |           |           |
|----|----|-----------|-----------|-----------|
| 16 | 1  | 3.402775  | -2.100725 | -3.301732 |
| 17 | 29 | 2.347687  | 0.627525  | -0.891925 |
| 18 | 15 | 0.414937  | 1.113823  | 0.201922  |
| 19 | 6  | -0.997830 | 0.119806  | -0.506970 |
| 20 | 1  | -0.933409 | 0.262653  | -1.589476 |
| 21 | 1  | -0.731426 | -0.926393 | -0.340706 |
| 22 | 6  | -2.418586 | 0.422674  | -0.014934 |
| 23 | 1  | -2.628652 | 1.487392  | -0.129266 |
| 24 | 1  | -2.529208 | 0.193374  | 1.049213  |
| 25 | 15 | -3.736445 | -0.458094 | -1.030248 |
| 26 | 35 | 5.852380  | -0.122273 | 0.674119  |
| 27 | 6  | -3.485114 | -2.247379 | -0.468373 |
| 28 | 6  | -3.878266 | -2.588585 | 0.979679  |
| 29 | 6  | -4.100024 | -3.255324 | -1.461744 |
| 30 | 1  | -2.395462 | -2.362644 | -0.550332 |
| 31 | 6  | -3.505416 | -4.036996 | 1.337152  |
| 32 | 1  | -4.958506 | -2.459961 | 1.109899  |
| 33 | 1  | -3.396757 | -1.900035 | 1.681464  |
| 34 | 6  | -3.734358 | -4.702120 | -1.096759 |
| 35 | 1  | -5.191173 | -3.153375 | -1.471823 |
| 36 | 1  | -3.761030 | -3.029493 | -2.478261 |
| 37 | 6  | -4.116342 | -5.039377 | 0.350002  |
| 38 | 1  | -3.831598 | -4.262920 | 2.358874  |
| 39 | 1  | -2.412448 | -4.141788 | 1.330254  |
| 40 | 1  | -4.223637 | -5.395263 | -1.790382 |
| 41 | 1  | -2.653493 | -4.844961 | -1.227840 |
| 42 | 1  | -3.798286 | -6.058049 | 0.598607  |
| 43 | 1  | -5.210054 | -5.023914 | 0.449440  |
| 44 | 6  | -5.302223 | 0.143243  | -0.159898 |
| 45 | 6  | -5.478386 | 1.663534  | -0.364863 |
| 46 | 6  | -6.547625 | -0.605243 | -0.677494 |
| 47 | 1  | -5.201554 | -0.047269 | 0.916241  |
| 48 | 6  | -6.778602 | 2.187401  | 0.264702  |
| 49 | 1  | -5.483489 | 1.884221  | -1.440554 |
| 50 | 1  | -4.631700 | 2.210788  | 0.059005  |
| 51 | 6  | -7.846510 | -0.080280 | -0.046660 |
| 52 | 1  | -6.605951 | -0.495040 | -1.768436 |
| 53 | 1  | -6.459275 | -1.676647 | -0.481187 |
| 54 | 6  | -8.008359 | 1.429968  | -0.247250 |
| 55 | 1  | -6.878552 | 3.259287  | 0.059556  |
| 56 | 1  | -6.718490 | 2.086032  | 1.356456  |
| 57 | 1  | -8.703153 | -0.614981 | -0.472333 |
| 58 | 1  | -7.844304 | -0.306210 | 1.028060  |
| 59 | 1  | -8.912644 | 1.787197  | 0.258032  |
| 60 | 1  | -8.145856 | 1.641027  | -1.316104 |
| 61 | 6  | -0.153047 | 2.891042  | -0.015324 |

|    |   |           |           |           |
|----|---|-----------|-----------|-----------|
| 62 | 6 | 0.809418  | 3.918144  | 0.613291  |
| 63 | 6 | -0.354743 | 3.188968  | -1.517449 |
| 64 | 1 | -1.120028 | 2.978984  | 0.494671  |
| 65 | 6 | 0.356341  | 5.363321  | 0.351881  |
| 66 | 1 | 1.817057  | 3.773451  | 0.203598  |
| 67 | 1 | 0.882316  | 3.760922  | 1.691688  |
| 68 | 6 | -0.802495 | 4.636795  | -1.766587 |
| 69 | 1 | 0.590342  | 3.008684  | -2.046274 |
| 70 | 1 | -1.088761 | 2.505049  | -1.952330 |
| 71 | 6 | 0.164430  | 5.646489  | -1.140947 |
| 72 | 1 | 1.088576  | 6.055406  | 0.782051  |
| 73 | 1 | -0.589382 | 5.545691  | 0.879419  |
| 74 | 1 | -0.891394 | 4.808523  | -2.844832 |
| 75 | 1 | -1.805809 | 4.784354  | -1.345726 |
| 76 | 1 | -0.201893 | 6.668074  | -1.290213 |
| 77 | 1 | 1.134562  | 5.585865  | -1.651718 |
| 78 | 6 | 0.426840  | 0.767134  | 2.050829  |
| 79 | 6 | 0.151438  | -0.718827 | 2.363645  |
| 80 | 6 | 1.780054  | 1.175743  | 2.674862  |
| 81 | 1 | -0.370861 | 1.372775  | 2.499826  |
| 82 | 6 | 0.194842  | -0.998514 | 3.874488  |
| 83 | 1 | 0.903218  | -1.339421 | 1.858836  |
| 84 | 1 | -0.820622 | -1.025652 | 1.972558  |
| 85 | 6 | 1.817016  | 0.911656  | 4.186600  |
| 86 | 1 | 2.576217  | 0.599562  | 2.189011  |
| 87 | 1 | 2.003736  | 2.226321  | 2.480615  |
| 88 | 6 | 1.517882  | -0.555822 | 4.508126  |
| 89 | 1 | 0.025971  | -2.066552 | 4.050752  |
| 90 | 1 | -0.635357 | -0.469352 | 4.360889  |
| 91 | 1 | 2.798164  | 1.196370  | 4.582075  |
| 92 | 1 | 1.081792  | 1.555276  | 4.687719  |
| 93 | 1 | 1.490681  | -0.713050 | 5.592018  |
| 94 | 1 | 2.332609  | -1.182294 | 4.122449  |

**TS-4.2:**

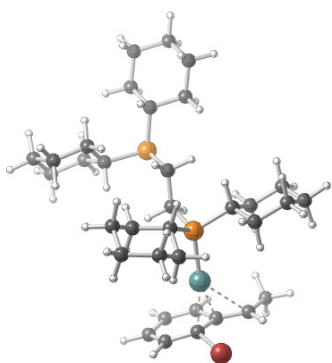

Charge = 0 Multiplicity = 1



Link 0: opt=(ts,calcfc,noeigen) freq=noraman b3lyp/gen scrf=(solvent=thf,smd)  
 pseudo=read  
 HF = -4782.7732182 hartrees (-3001238.02215268 kcal/mol)  
 Imaginary Frequencies: 1 (-60.4798 1/cm)  
 Zero-point correction = 0.834437 (Hartree/Particle)

Temperature 298.150 Kelvin. Pressure 1.00000 Atm.  
 Sum of electronic and thermal Free Energies =  
 -4782.018038 hartrees (-3000764.13902538 kcal/mol)

Coordinates (from last standard orientation):  
 atom 25 is isolated, type=P

| Center<br>Number | Atomic<br>Number | Coordinates (Angstroms) |           |           |
|------------------|------------------|-------------------------|-----------|-----------|
|                  |                  | X                       | Y         | Z         |
| 1                | 6                | 3.242903                | -0.817744 | -3.184589 |
| 2                | 6                | 4.040883                | -0.163523 | -2.138957 |
| 3                | 6                | 4.385158                | -1.094906 | -1.050728 |
| 4                | 6                | 4.190438                | -2.489760 | -1.157479 |
| 5                | 6                | 3.504487                | -3.044280 | -2.220318 |
| 6                | 6                | 3.019912                | -2.169045 | -3.227213 |
| 7                | 1                | 4.585099                | -3.127429 | -0.373168 |
| 8                | 1                | 3.313965                | -4.110653 | -2.262015 |
| 9                | 1                | 2.465356                | -2.579642 | -4.067482 |
| 10               | 6                | 4.345824                | 1.185107  | -2.176195 |
| 11               | 1                | 5.011898                | 1.582661  | -1.419563 |
| 12               | 6                | 3.959793                | 2.099338  | -3.309760 |
| 13               | 1                | 4.233704                | 3.132656  | -3.077960 |
| 14               | 1                | 4.456449                | 1.850985  | -4.261251 |
| 15               | 1                | 2.882908                | 2.103457  | -3.526649 |
| 16               | 1                | 2.900626                | -0.200575 | -4.008301 |
| 17               | 29               | 2.553162                | -0.137872 | -0.471104 |
| 18               | 15               | 0.683570                | 0.485461  | 0.601411  |
| 19               | 6                | -0.810563               | 0.040913  | -0.424636 |
| 20               | 1                | -0.607943               | 0.438136  | -1.422961 |
| 21               | 1                | -0.776550               | -1.045082 | -0.536723 |
| 22               | 6                | -2.183420               | 0.521154  | 0.064031  |
| 23               | 1                | -2.186102               | 1.610536  | 0.121310  |
| 24               | 1                | -2.406017               | 0.151737  | 1.069205  |
| 25               | 15               | -3.559936               | 0.057041  | -1.133113 |
| 26               | 35               | 5.758655                | -0.538238 | 0.246624  |
| 27               | 6                | -3.763328               | -1.780107 | -0.718868 |
| 28               | 6                | -4.395456               | -2.129595 | 0.640064  |
| 29               | 6                | -4.445749               | -2.560812 | -1.861017 |

|    |   |           |           |           |
|----|---|-----------|-----------|-----------|
| 30 | 1 | -2.720420 | -2.125104 | -0.693875 |
| 31 | 6 | -4.370964 | -3.645562 | 0.898918  |
| 32 | 1 | -5.435891 | -1.786583 | 0.663980  |
| 33 | 1 | -3.877974 | -1.609536 | 1.452771  |
| 34 | 6 | -4.424383 | -4.074451 | -1.598015 |
| 35 | 1 | -5.485205 | -2.231063 | -1.971561 |
| 36 | 1 | -3.949182 | -2.339124 | -2.811516 |
| 37 | 6 | -5.041680 | -4.425678 | -0.238582 |
| 38 | 1 | -4.864019 | -3.866328 | 1.852667  |
| 39 | 1 | -3.330262 | -3.979712 | 1.003477  |
| 40 | 1 | -4.952614 | -4.599364 | -2.402021 |
| 41 | 1 | -3.385637 | -4.429496 | -1.626610 |
| 42 | 1 | -4.966682 | -5.503245 | -0.054509 |
| 43 | 1 | -6.114073 | -4.189071 | -0.255829 |
| 44 | 6 | -5.038524 | 0.925236  | -0.338924 |
| 45 | 6 | -4.863726 | 2.458629  | -0.389075 |
| 46 | 6 | -6.349070 | 0.525935  | -1.048056 |
| 47 | 1 | -5.101862 | 0.621349  | 0.713520  |
| 48 | 6 | -6.083440 | 3.198888  | 0.182269  |
| 49 | 1 | -4.708627 | 2.770928  | -1.430306 |
| 50 | 1 | -3.970945 | 2.766506  | 0.162353  |
| 51 | 6 | -7.568485 | 1.264657  | -0.475985 |
| 52 | 1 | -6.260601 | 0.752414  | -2.118963 |
| 53 | 1 | -6.512572 | -0.551741 | -0.974901 |
| 54 | 6 | -7.382549 | 2.784889  | -0.516694 |
| 55 | 1 | -5.930272 | 4.280256  | 0.092628  |
| 56 | 1 | -6.165088 | 2.986162  | 1.256536  |
| 57 | 1 | -8.467056 | 0.975719  | -1.032738 |
| 58 | 1 | -7.731834 | 0.945373  | 0.561949  |
| 59 | 1 | -8.240091 | 3.287086  | -0.055083 |
| 60 | 1 | -7.353077 | 3.117698  | -1.562675 |
| 61 | 6 | 0.496716  | 2.330475  | 0.882201  |
| 62 | 6 | 1.570754  | 2.912945  | 1.820965  |
| 63 | 6 | 0.499930  | 3.074328  | -0.469573 |
| 64 | 1 | -0.482543 | 2.467758  | 1.357459  |
| 65 | 6 | 1.415754  | 4.432407  | 1.991083  |
| 66 | 1 | 2.566406  | 2.692280  | 1.415854  |
| 67 | 1 | 1.517672  | 2.439250  | 2.804125  |
| 68 | 6 | 0.344596  | 4.591618  | -0.288870 |
| 69 | 1 | 1.445196  | 2.867738  | -0.986923 |
| 70 | 1 | -0.297898 | 2.702164  | -1.118098 |
| 71 | 6 | 1.414460  | 5.164879  | 0.645850  |
| 72 | 1 | 2.221541  | 4.808574  | 2.630954  |
| 73 | 1 | 0.476696  | 4.642211  | 2.520407  |
| 74 | 1 | 0.390965  | 5.080112  | -1.268316 |
| 75 | 1 | -0.651283 | 4.809489  | 0.119167  |

|    |   |           |           |          |
|----|---|-----------|-----------|----------|
| 76 | 1 | 1.252535  | 6.237678  | 0.797234 |
| 77 | 1 | 2.400681  | 5.061759  | 0.174826 |
| 78 | 6 | 0.456669  | -0.341557 | 2.275535 |
| 79 | 6 | -0.193573 | -1.734548 | 2.151612 |
| 80 | 6 | 1.806805  | -0.466883 | 3.015713 |
| 81 | 1 | -0.210183 | 0.305689  | 2.859137 |
| 82 | 6 | -0.355397 | -2.407845 | 3.523301 |
| 83 | 1 | 0.429899  | -2.369321 | 1.508822 |
| 84 | 1 | -1.170755 | -1.665925 | 1.670220 |
| 85 | 6 | 1.646033  | -1.133678 | 4.389710 |
| 86 | 1 | 2.489610  | -1.064741 | 2.399207 |
| 87 | 1 | 2.281024  | 0.509512  | 3.134684 |
| 88 | 6 | 0.974595  | -2.506136 | 4.276920 |
| 89 | 1 | -0.793204 | -3.403180 | 3.390188 |
| 90 | 1 | -1.071928 | -1.831842 | 4.123614 |
| 91 | 1 | 2.628172  | -1.226826 | 4.865703 |
| 92 | 1 | 1.045792  | -0.484933 | 5.041272 |
| 93 | 1 | 0.816647  | -2.936833 | 5.271701 |
| 94 | 1 | 1.643975  | -3.193153 | 3.742899 |

### INT-4.3:

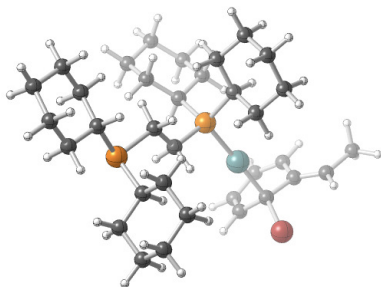

Charge = 0 Multiplicity = 1

Link 0: opt freq=noraman b3lyp/gen scrf=(smd,solvent=thf) pseudo=read  
 HF = -4782.7712484 hartrees (-3001236.78608348 kcal/mol)

Imaginary Frequencies: none found

Zero-point correction = 0.834797 (Hartree/Particle)

Temperature 298.150 Kelvin. Pressure 1.00000 Atm.

Sum of electronic and thermal Free Energies =

-4782.017771 hartrees (-3000763.97148021 kcal/mol)

Coordinates (from last standard orientation):

atom 25 is isolated, type=P

-----

| Center<br>Number | Atomic<br>Number | Coordinates (Angstroms) |           |           |
|------------------|------------------|-------------------------|-----------|-----------|
|                  |                  | X                       | Y         | Z         |
| 1                | 6                | 5.849957                | 0.444771  | -0.760891 |
| 2                | 6                | 5.276135                | -0.692381 | -0.023938 |
| 3                | 6                | 4.167355                | -1.339596 | -0.776957 |
| 4                | 6                | 4.152875                | -1.237494 | -2.220309 |
| 5                | 6                | 4.854281                | -0.262444 | -2.873491 |
| 6                | 6                | 5.674197                | 0.624406  | -2.097839 |
| 7                | 1                | 3.512496                | -1.915859 | -2.774847 |
| 8                | 1                | 4.753785                | -0.128232 | -3.945181 |
| 9                | 1                | 6.186782                | 1.443429  | -2.596096 |
| 10               | 6                | 5.726574                | -1.039996 | 1.211973  |
| 11               | 1                | 5.281502                | -1.901021 | 1.698568  |
| 12               | 6                | 6.784200                | -0.296345 | 1.987899  |
| 13               | 1                | 7.091545                | -0.872427 | 2.865181  |
| 14               | 1                | 7.693447                | -0.103562 | 1.404922  |
| 15               | 1                | 6.445976                | 0.682032  | 2.362009  |
| 16               | 1                | 6.534138                | 1.095646  | -0.226318 |
| 17               | 29               | 2.556916                | -0.171473 | -0.395705 |
| 18               | 15               | 0.695015                | 1.033407  | 0.051339  |
| 19               | 6                | -0.790618               | 0.074137  | -0.543195 |
| 20               | 1                | -0.709809               | 0.123208  | -1.635699 |
| 21               | 1                | -0.564667               | -0.963463 | -0.287760 |
| 22               | 6                | -2.212836               | 0.432261  | -0.088426 |
| 23               | 1                | -2.391982               | 1.501664  | -0.194332 |
| 24               | 1                | -2.352731               | 0.189081  | 0.967652  |
| 25               | 15               | -3.520851               | -0.423281 | -1.140237 |
| 26               | 35               | 3.672802                | -3.188927 | -0.153257 |
| 27               | 6                | 0.767085                | 2.633771  | -0.923808 |
| 28               | 6                | -0.536589               | 3.416063  | -1.172907 |
| 29               | 6                | 1.875257                | 3.548562  | -0.361905 |
| 30               | 1                | 1.112331                | 2.270672  | -1.901408 |
| 31               | 6                | -0.278808               | 4.630865  | -2.081132 |
| 32               | 1                | -0.963659               | 3.759534  | -0.225722 |
| 33               | 1                | -1.282435               | 2.769546  | -1.642183 |
| 34               | 6                | 2.113807                | 4.764875  | -1.268656 |
| 35               | 1                | 1.591305                | 3.897101  | 0.637833  |
| 36               | 1                | 2.807049                | 2.984454  | -0.245448 |
| 37               | 6                | 0.818759                | 5.544579  | -1.524459 |
| 38               | 1                | -1.210898               | 5.191114  | -2.213818 |
| 39               | 1                | 0.015136                | 4.277840  | -3.078324 |
| 40               | 1                | 2.869407                | 5.416568  | -0.816559 |
| 41               | 1                | 2.528948                | 4.424659  | -2.225967 |
| 42               | 1                | 1.006350                | 6.373670  | -2.215493 |
| 43               | 1                | 0.474052                | 5.996867  | -0.585025 |

|    |   |           |           |           |
|----|---|-----------|-----------|-----------|
| 44 | 6 | 0.559131  | 1.393995  | 1.882457  |
| 45 | 6 | -0.512275 | 2.392677  | 2.360504  |
| 46 | 6 | 0.472203  | 0.068463  | 2.669197  |
| 47 | 1 | 1.540677  | 1.835047  | 2.100645  |
| 48 | 6 | -0.408645 | 2.624496  | 3.877163  |
| 49 | 1 | -1.511274 | 2.015417  | 2.122227  |
| 50 | 1 | -0.402088 | 3.346693  | 1.840373  |
| 51 | 6 | 0.564734  | 0.308177  | 4.183181  |
| 52 | 1 | -0.476611 | -0.432532 | 2.441318  |
| 53 | 1 | 1.269474  | -0.611962 | 2.351936  |
| 54 | 6 | -0.487812 | 1.312725  | 4.666371  |
| 55 | 1 | -1.201975 | 3.309384  | 4.196454  |
| 56 | 1 | 0.541979  | 3.126477  | 4.100645  |
| 57 | 1 | 0.454642  | -0.644740 | 4.712206  |
| 58 | 1 | 1.566543  | 0.684695  | 4.426712  |
| 59 | 1 | -0.361563 | 1.507142  | 5.736940  |
| 60 | 1 | -1.488462 | 0.876314  | 4.546893  |
| 61 | 6 | -3.310950 | -2.215675 | -0.570390 |
| 62 | 6 | -3.729726 | -2.545206 | 0.873550  |
| 63 | 6 | -3.928149 | -3.216986 | -1.568911 |
| 64 | 1 | -2.222622 | -2.350456 | -0.636500 |
| 65 | 6 | -3.385886 | -3.998432 | 1.240583  |
| 66 | 1 | -4.809294 | -2.397005 | 0.988479  |
| 67 | 1 | -3.245394 | -1.863550 | 1.580187  |
| 68 | 6 | -3.589735 | -4.667881 | -1.194345 |
| 69 | 1 | -5.017272 | -3.098857 | -1.594060 |
| 70 | 1 | -3.571858 | -2.999931 | -2.581433 |
| 71 | 6 | -3.997673 | -4.994654 | 0.247840  |
| 72 | 1 | -3.730603 | -4.215588 | 2.258103  |
| 73 | 1 | -2.294732 | -4.120492 | 1.250390  |
| 74 | 1 | -4.079516 | -5.355773 | -1.892820 |
| 75 | 1 | -2.509410 | -4.827792 | -1.309227 |
| 76 | 1 | -3.698361 | -6.017093 | 0.504224  |
| 77 | 1 | -5.092359 | -4.962600 | 0.331448  |
| 78 | 6 | -5.098662 | 0.205822  | -0.312919 |
| 79 | 6 | -5.251001 | 1.724965  | -0.542803 |
| 80 | 6 | -6.341047 | -0.534350 | -0.849491 |
| 81 | 1 | -5.025279 | 0.026999  | 0.767515  |
| 82 | 6 | -6.557888 | 2.273179  | 0.050909  |
| 83 | 1 | -5.230856 | 1.929351  | -1.621516 |
| 84 | 1 | -4.406463 | 2.268255  | -0.109645 |
| 85 | 6 | -7.647151 | 0.014724  | -0.255243 |
| 86 | 1 | -6.373307 | -0.438036 | -1.942889 |
| 87 | 1 | -6.270366 | -1.603845 | -0.636906 |
| 88 | 6 | -7.785271 | 1.524052  | -0.478911 |
| 89 | 1 | -6.639855 | 3.343400  | -0.170241 |

|    |   |           |           |           |
|----|---|-----------|-----------|-----------|
| 90 | 1 | -6.523229 | 2.185406  | 1.144954  |
| 91 | 1 | -8.500538 | -0.515042 | -0.693433 |
| 92 | 1 | -7.671995 | -0.197139 | 0.822033  |
| 93 | 1 | -8.696157 | 1.899115  | 0.000981  |
| 94 | 1 | -7.896013 | 1.722708  | -1.553252 |

#### TS-4.4:

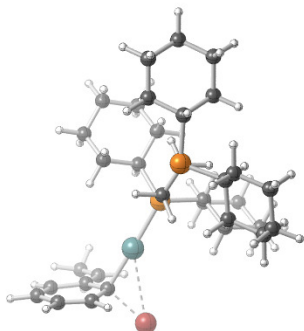

Charge = 0 Multiplicity = 1

Link 0: scf=tight opt=(calcfc,ts,noeigen) freq=noraman b3lyp/gen scrf=(solvent=thf,smd)  
pseudo=read

HF = -4782.7761176 hartrees (-3001239.84155518 kcal/mol)

Imaginary Frequencies: 1 (-46.6945 1/cm)

Zero-point correction = 0.834532 (Hartree/Particle)

Temperature 298.150 Kelvin. Pressure 1.00000 Atm.

Sum of electronic and thermal Free Energies =

-4782.022158 hartrees (-3000766.72436658 kcal/mol)

Coordinates (from last standard orientation):

atom 39 is isolated, type=P

| -----  |        |                         |           |           |  |
|--------|--------|-------------------------|-----------|-----------|--|
| Center | Atomic | Coordinates (Angstroms) |           |           |  |
| Number | Number | X                       | Y         | Z         |  |
| -----  |        |                         |           |           |  |
| 1      | 6      | -2.358658               | 0.168539  | -0.082163 |  |
| 2      | 6      | -0.905753               | -0.031407 | -0.534490 |  |
| 3      | 15     | 0.498706                | 0.519735  | 0.561139  |  |
| 4      | 6      | 0.416432                | 2.380139  | 0.779729  |  |
| 5      | 1      | 1.364179                | 2.594266  | 1.291089  |  |
| 6      | 6      | -0.716883               | 2.948911  | 1.654209  |  |
| 7      | 6      | -0.562524               | 4.468536  | 1.827431  |  |
| 8      | 6      | -0.498232               | 5.191035  | 0.476339  |  |
| 9      | 6      | 0.608616                | 4.613899  | -0.414799 |  |
| 10     | 6      | 0.470234                | 3.093565  | -0.586283 |  |
| 11     | 1      | 1.304145                | 2.707046  | -1.181998 |  |
| 12     | 1      | -0.444566               | 2.877086  | -1.151202 |  |

|    |    |           |           |           |
|----|----|-----------|-----------|-----------|
| 13 | 1  | 1.587370  | 4.838096  | 0.028590  |
| 14 | 1  | 0.595825  | 5.097013  | -1.397943 |
| 15 | 1  | -0.340300 | 6.264394  | 0.627708  |
| 16 | 1  | -1.465216 | 5.089253  | -0.034191 |
| 17 | 1  | 0.353760  | 4.676056  | 2.395577  |
| 18 | 1  | -1.393303 | 4.856122  | 2.427509  |
| 19 | 1  | -1.687597 | 2.740648  | 1.193614  |
| 20 | 1  | -0.726193 | 2.468237  | 2.636310  |
| 21 | 6  | 0.190054  | -0.219056 | 2.247220  |
| 22 | 1  | -0.783889 | 0.145412  | 2.594029  |
| 23 | 6  | 0.138359  | -1.758618 | 2.177616  |
| 24 | 6  | -0.072998 | -2.380419 | 3.566293  |
| 25 | 6  | 0.992828  | -1.916234 | 4.565459  |
| 26 | 6  | 1.060343  | -0.386357 | 4.634318  |
| 27 | 6  | 1.271338  | 0.238717  | 3.247453  |
| 28 | 1  | 1.280515  | 1.329032  | 3.334667  |
| 29 | 1  | 2.257968  | -0.052565 | 2.865391  |
| 30 | 1  | 0.128830  | 0.001287  | 5.067388  |
| 31 | 1  | 1.867759  | -0.070567 | 5.303896  |
| 32 | 1  | 0.789130  | -2.332185 | 5.558212  |
| 33 | 1  | 1.971154  | -2.308429 | 4.258524  |
| 34 | 1  | -1.067939 | -2.104243 | 3.939506  |
| 35 | 1  | -0.065895 | -3.472587 | 3.481814  |
| 36 | 1  | -0.658392 | -2.086532 | 1.503737  |
| 37 | 1  | 1.078879  | -2.132596 | 1.754035  |
| 38 | 29 | 2.474248  | -0.087089 | -0.363794 |
| 39 | 15 | -3.594153 | -0.443985 | -1.371618 |
| 40 | 6  | -5.057142 | 0.717846  | -1.099924 |
| 41 | 6  | -5.577349 | 0.866151  | 0.340527  |
| 42 | 6  | -6.790705 | 1.808001  | 0.415002  |
| 43 | 6  | -6.488355 | 3.177689  | -0.204507 |
| 44 | 6  | -5.972050 | 3.035565  | -1.641200 |
| 45 | 6  | -4.758312 | 2.097213  | -1.722262 |
| 46 | 1  | -3.912562 | 2.564746  | -1.201335 |
| 47 | 1  | -4.449103 | 1.976138  | -2.765906 |
| 48 | 1  | -6.774857 | 2.640112  | -2.277123 |
| 49 | 1  | -5.709017 | 4.017704  | -2.050021 |
| 50 | 1  | -5.731958 | 3.691856  | 0.403763  |
| 51 | 1  | -7.382998 | 3.809819  | -0.183502 |
| 52 | 1  | -7.636385 | 1.349567  | -0.114515 |
| 53 | 1  | -7.105913 | 1.923175  | 1.458444  |
| 54 | 1  | -5.848715 | -0.110795 | 0.751714  |
| 55 | 1  | -4.780711 | 1.263366  | 0.981361  |
| 56 | 1  | -5.854208 | 0.264673  | -1.703572 |
| 57 | 6  | -4.185210 | -2.068635 | -0.615066 |
| 58 | 6  | -3.060273 | -3.122608 | -0.670707 |

|    |    |           |           |           |
|----|----|-----------|-----------|-----------|
| 59 | 6  | -3.514141 | -4.483706 | -0.121478 |
| 60 | 6  | -4.768068 | -4.995487 | -0.839634 |
| 61 | 6  | -5.894179 | -3.957149 | -0.789603 |
| 62 | 6  | -5.442710 | -2.593500 | -1.335027 |
| 63 | 1  | -6.265106 | -1.878321 | -1.242700 |
| 64 | 1  | -5.231548 | -2.685711 | -2.408829 |
| 65 | 1  | -6.763248 | -4.309828 | -1.356282 |
| 66 | 1  | -6.230295 | -3.836932 | 0.248752  |
| 67 | 1  | -4.522018 | -5.213914 | -1.887381 |
| 68 | 1  | -5.101863 | -5.940351 | -0.396342 |
| 69 | 1  | -2.698169 | -5.209102 | -0.215547 |
| 70 | 1  | -3.723702 | -4.390808 | 0.952435  |
| 71 | 1  | -2.732313 | -3.245687 | -1.711078 |
| 72 | 1  | -2.185864 | -2.778168 | -0.109677 |
| 73 | 1  | -4.434045 | -1.891723 | 0.439549  |
| 74 | 6  | 5.692551  | 0.915034  | 0.161140  |
| 75 | 6  | 6.708167  | 1.971516  | 0.477838  |
| 76 | 1  | 6.947317  | 2.624389  | -0.363216 |
| 77 | 1  | 6.358135  | 2.613099  | 1.296100  |
| 78 | 1  | 7.653710  | 1.532428  | 0.826074  |
| 79 | 6  | 5.243567  | 0.517083  | -1.059557 |
| 80 | 6  | 5.729990  | 1.127231  | -2.299780 |
| 81 | 6  | 5.290569  | 0.750067  | -3.523034 |
| 82 | 6  | 4.341735  | -0.326936 | -3.679628 |
| 83 | 6  | 3.897332  | -0.991805 | -2.583228 |
| 84 | 6  | 4.201977  | -0.562265 | -1.221841 |
| 85 | 35 | 4.767435  | -2.331418 | -0.176041 |
| 86 | 1  | 3.235876  | -1.844527 | -2.700407 |
| 87 | 1  | 3.999808  | -0.604323 | -4.672182 |
| 88 | 1  | 5.693565  | 1.229387  | -4.411167 |
| 89 | 1  | 6.510230  | 1.877487  | -2.231103 |
| 90 | 1  | 5.312376  | 0.375511  | 1.026055  |
| 91 | 1  | -0.703288 | -1.087943 | -0.730234 |
| 92 | 1  | -0.735709 | 0.468712  | -1.492673 |
| 93 | 1  | -2.560731 | 1.231268  | 0.055222  |
| 94 | 1  | -2.547914 | -0.315883 | 0.879528  |

**INT-4.5:**

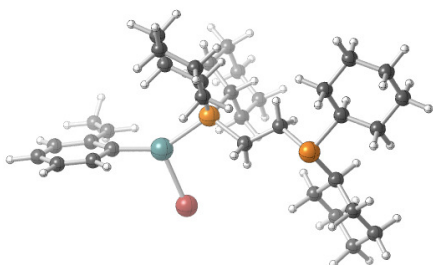



Charge = 0 Multiplicity = 1

Link 0: opt freq=noraman b3lyp/gen scrf=(smd,solvent=thf) pseudo=read

HF = -4782.7961182 hartrees (-3001252.39213168 kcal/mol)

Imaginary Frequencies: none found

Zero-point correction = 0.835676 (Hartree/Particle)

Temperature 298.150 Kelvin. Pressure 1.00000 Atm.

Sum of electronic and thermal Free Energies =

-4782.043591 hartrees (-3000780.17378841 kcal/mol)

Coordinates (from last standard orientation):

atom 25 is isolated, type=P

| -----  |        |                         |           |           |
|--------|--------|-------------------------|-----------|-----------|
| Center | Atomic | Coordinates (Angstroms) |           |           |
| Number | Number | X                       | Y         | Z         |
| -----  |        |                         |           |           |
| 1      | 6      | 6.977295                | -0.071114 | -0.952079 |
| 2      | 6      | 5.672346                | -0.283713 | -0.365823 |
| 3      | 6      | 4.443727                | -0.026944 | -1.116333 |
| 4      | 6      | 4.650814                | 0.446063  | -2.439699 |
| 5      | 6      | 5.905504                | 0.656693  | -2.975465 |
| 6      | 6      | 7.086636                | 0.394154  | -2.227694 |
| 7      | 1      | 3.787674                | 0.654569  | -3.066218 |
| 8      | 1      | 6.002760                | 1.028498  | -3.992180 |
| 9      | 1      | 8.058814                | 0.560821  | -2.678841 |
| 10     | 6      | 5.541478                | -0.737270 | 0.929245  |
| 11     | 6      | 6.585056                | -1.104443 | 1.907009  |
| 12     | 1      | 6.431523                | -2.147253 | 2.214960  |
| 13     | 1      | 7.609493                | -0.987092 | 1.559237  |
| 14     | 1      | 6.446094                | -0.515220 | 2.822610  |
| 15     | 1      | 7.872217                | -0.282717 | -0.378291 |
| 16     | 35     | 1.951305                | -2.814535 | -1.078034 |
| 17     | 29     | 2.632031                | -0.426737 | -0.534860 |
| 18     | 15     | 0.720234                | 0.550126  | 0.383010  |
| 19     | 6      | -0.828456               | -0.176272 | -0.362272 |
| 20     | 1      | -0.775159               | 0.060102  | -1.428429 |
| 21     | 1      | -0.687410               | -1.256484 | -0.313849 |
| 22     | 6      | -2.182468               | 0.247178  | 0.225413  |
| 23     | 1      | -2.195315               | 1.324775  | 0.403586  |
| 24     | 1      | -2.356300               | -0.223451 | 1.197221  |
| 25     | 15     | -3.648419               | -0.074814 | -0.916682 |
| 26     | 1      | 4.517930                | -0.847856 | 1.282225  |
| 27     | 6      | 0.444452                | 0.318140  | 2.231291  |
| 28     | 6      | 0.429849                | -1.184262 | 2.580217  |

|    |   |           |           |           |
|----|---|-----------|-----------|-----------|
| 29 | 6 | 1.467387  | 1.067427  | 3.106259  |
| 30 | 1 | -0.547924 | 0.733754  | 2.446832  |
| 31 | 6 | 0.190888  | -1.426027 | 4.077672  |
| 32 | 1 | 1.387606  | -1.631529 | 2.290499  |
| 33 | 1 | -0.333740 | -1.705860 | 1.997188  |
| 34 | 6 | 1.236393  | 0.810867  | 4.604438  |
| 35 | 1 | 2.482660  | 0.752048  | 2.834448  |
| 36 | 1 | 1.414039  | 2.142801  | 2.920372  |
| 37 | 6 | 1.217340  | -0.683807 | 4.939601  |
| 38 | 1 | 0.224720  | -2.501587 | 4.283965  |
| 39 | 1 | -0.819854 | -1.090983 | 4.346379  |
| 40 | 1 | 2.011272  | 1.323623  | 5.185309  |
| 41 | 1 | 0.279870  | 1.260320  | 4.902157  |
| 42 | 1 | 1.001403  | -0.831521 | 6.003553  |
| 43 | 1 | 2.214098  | -1.109487 | 4.763098  |
| 44 | 6 | 0.563468  | 2.412028  | 0.101917  |
| 45 | 6 | 1.931251  | 3.115972  | 0.241331  |
| 46 | 6 | -0.039894 | 2.748002  | -1.278383 |
| 47 | 1 | -0.110807 | 2.797861  | 0.877740  |
| 48 | 6 | 1.818626  | 4.634194  | 0.039449  |
| 49 | 1 | 2.614751  | 2.702166  | -0.508820 |
| 50 | 1 | 2.386352  | 2.906297  | 1.211840  |
| 51 | 6 | -0.149575 | 4.264909  | -1.499749 |
| 52 | 1 | 0.590976  | 2.311965  | -2.064189 |
| 53 | 1 | -1.029247 | 2.301255  | -1.394382 |
| 54 | 6 | 1.194750  | 4.976026  | -1.317953 |
| 55 | 1 | 2.811282  | 5.090058  | 0.128016  |
| 56 | 1 | 1.206811  | 5.066225  | 0.842714  |
| 57 | 1 | -0.551343 | 4.458208  | -2.500518 |
| 58 | 1 | -0.877774 | 4.678572  | -0.789328 |
| 59 | 1 | 1.068671  | 6.059747  | -1.419426 |
| 60 | 1 | 1.879834  | 4.666436  | -2.118065 |
| 61 | 6 | -4.908240 | 1.055489  | -0.059363 |
| 62 | 6 | -4.621753 | 2.528585  | -0.421089 |
| 63 | 6 | -6.370714 | 0.713633  | -0.399960 |
| 64 | 1 | -4.771626 | 0.927209  | 1.023958  |
| 65 | 6 | -5.602612 | 3.495362  | 0.259112  |
| 66 | 1 | -4.697243 | 2.647182  | -1.509671 |
| 67 | 1 | -3.597443 | 2.806550  | -0.154282 |
| 68 | 6 | -7.359410 | 1.679455  | 0.273551  |
| 69 | 1 | -6.509893 | 0.755894  | -1.488067 |
| 70 | 1 | -6.607293 | -0.308635 | -0.094074 |
| 71 | 6 | -7.057692 | 3.142996  | -0.066819 |
| 72 | 1 | -5.381130 | 4.523161  | -0.050096 |
| 73 | 1 | -5.453294 | 3.460166  | 1.346465  |
| 74 | 1 | -8.382560 | 1.422660  | -0.023745 |

|    |   |           |           |           |
|----|---|-----------|-----------|-----------|
| 75 | 1 | -7.310632 | 1.542510  | 1.362041  |
| 76 | 1 | -7.741910 | 3.807919  | 0.472262  |
| 77 | 1 | -7.239323 | 3.311193  | -1.136659 |
| 78 | 6 | -4.243613 | -1.806398 | -0.418034 |
| 79 | 6 | -5.137155 | -2.385870 | -1.536368 |
| 80 | 6 | -3.094744 | -2.788791 | -0.120454 |
| 81 | 1 | -4.842214 | -1.699338 | 0.497069  |
| 82 | 6 | -5.669604 | -3.784471 | -1.190401 |
| 83 | 1 | -4.545299 | -2.444908 | -2.458819 |
| 84 | 1 | -5.972591 | -1.715499 | -1.755469 |
| 85 | 6 | -3.617568 | -4.191875 | 0.227347  |
| 86 | 1 | -2.435774 | -2.858853 | -0.994898 |
| 87 | 1 | -2.479448 | -2.424214 | 0.705664  |
| 88 | 6 | -4.528071 | -4.755526 | -0.868642 |
| 89 | 1 | -6.271763 | -4.166337 | -2.022684 |
| 90 | 1 | -6.344489 | -3.714864 | -0.326663 |
| 91 | 1 | -2.769810 | -4.864291 | 0.400377  |
| 92 | 1 | -4.174521 | -4.144520 | 1.172791  |
| 93 | 1 | -4.927900 | -5.730190 | -0.566862 |
| 94 | 1 | -3.935730 | -4.929771 | -1.776481 |

**TS-4.6:**

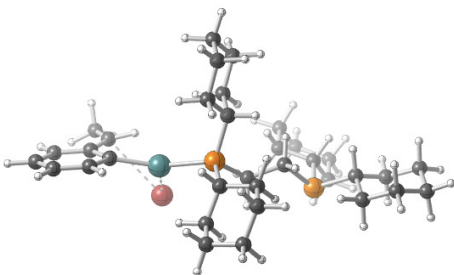

Charge = 0 Multiplicity = 1

Link 0: opt=(calcfc,ts,noeigen) freq=noraman b3lyp/gen scrf=(smd,solvent=thf)  
pseudo=read

HF = -4782.7939036 hartrees (-3001251.00244804 kcal/mol)

Imaginary Frequencies: 1 (-55.9633 1/cm)

Zero-point correction = 0.836589 (Hartree/Particle)

Temperature 298.150 Kelvin. Pressure 1.00000 Atm.

Sum of electronic and thermal Free Energies =

-4782.036992 hartrees (-3000776.03284992 kcal/mol)

Coordinates (from last standard orientation):

atom 25 is isolated, type=P

| Center<br>Number | Atomic<br>Number | Coordinates (Angstroms) |           |           |
|------------------|------------------|-------------------------|-----------|-----------|
|                  |                  | X                       | Y         | Z         |
| 1                | 6                | -6.794128               | 1.258307  | -0.262502 |
| 2                | 6                | -5.380306               | 1.171288  | -0.052703 |
| 3                | 6                | -4.677955               | -0.093665 | -0.108408 |
| 4                | 6                | -5.500609               | -1.223292 | -0.293830 |
| 5                | 6                | -6.874942               | -1.129055 | -0.486874 |
| 6                | 6                | -7.530651               | 0.118740  | -0.474213 |
| 7                | 1                | -5.051050               | -2.212426 | -0.322393 |
| 8                | 1                | -7.457933               | -2.029649 | -0.662106 |
| 9                | 1                | -8.604204               | 0.171779  | -0.620035 |
| 10               | 6                | -4.638410               | 2.314179  | 0.261524  |
| 11               | 6                | -5.117765               | 3.709149  | 0.358829  |
| 12               | 1                | -4.324684               | 4.400178  | 0.066166  |
| 13               | 1                | -6.016702               | 3.922076  | -0.217829 |
| 14               | 1                | -5.331254               | 3.925081  | 1.416993  |
| 15               | 1                | -7.296274               | 2.218392  | -0.219118 |
| 16               | 35               | -2.345154               | 2.036242  | -1.820055 |
| 17               | 29               | -2.721906               | -0.163683 | -0.265996 |
| 18               | 15               | -0.668655               | -1.074301 | 0.208087  |
| 19               | 6                | 0.778265                | -0.137044 | -0.523435 |
| 20               | 1                | 0.815193                | -0.445125 | -1.573283 |
| 21               | 1                | 0.452714                | 0.903700  | -0.552294 |
| 22               | 6                | 2.167854                | -0.260851 | 0.117921  |
| 23               | 1                | 2.468567                | -1.307553 | 0.173274  |
| 24               | 1                | 2.170187                | 0.115303  | 1.144248  |
| 25               | 15               | 3.529246                | 0.598800  | -0.867951 |
| 26               | 1                | -3.625007               | 2.144090  | 0.599212  |
| 27               | 6                | -0.564981               | -2.828618 | -0.444711 |
| 28               | 6                | -0.987323               | -2.881112 | -1.927656 |
| 29               | 6                | 0.764703                | -3.572063 | -0.230469 |
| 30               | 1                | -1.343034               | -3.349970 | 0.127314  |
| 31               | 6                | -1.057439               | -4.327523 | -2.440766 |
| 32               | 1                | -0.271218               | -2.316768 | -2.537482 |
| 33               | 1                | -1.958146               | -2.390680 | -2.056171 |
| 34               | 6                | 0.681246                | -5.021993 | -0.733841 |
| 35               | 1                | 1.561377                | -3.056999 | -0.778160 |
| 36               | 1                | 1.049236                | -3.561699 | 0.826550  |
| 37               | 6                | 0.256258                | -5.083003 | -2.205969 |
| 38               | 1                | -1.310635               | -4.327481 | -3.506709 |
| 39               | 1                | -1.874692               | -4.851726 | -1.927886 |
| 40               | 1                | 1.649260                | -5.517138 | -0.596818 |
| 41               | 1                | -0.041131               | -5.577720 | -0.121526 |
| 42               | 1                | 0.156953                | -6.124969 | -2.529872 |

|    |   |           |           |           |
|----|---|-----------|-----------|-----------|
| 43 | 1 | 1.045019  | -4.638927 | -2.827501 |
| 44 | 6 | -0.314838 | -1.193281 | 2.043957  |
| 45 | 6 | -0.438074 | 0.202881  | 2.688248  |
| 46 | 6 | -1.248855 | -2.193301 | 2.753361  |
| 47 | 1 | 0.716907  | -1.544126 | 2.161380  |
| 48 | 6 | -0.171975 | 0.160776  | 4.199834  |
| 49 | 1 | -1.451385 | 0.584871  | 2.510818  |
| 50 | 1 | 0.246112  | 0.910271  | 2.209757  |
| 51 | 6 | -0.989640 | -2.232232 | 4.267803  |
| 52 | 1 | -2.292391 | -1.907526 | 2.569544  |
| 53 | 1 | -1.123888 | -3.197938 | 2.339919  |
| 54 | 6 | -1.092285 | -0.841968 | 4.905140  |
| 55 | 1 | -0.302182 | 1.162149  | 4.624941  |
| 56 | 1 | 0.875290  | -0.117737 | 4.377239  |
| 57 | 1 | -1.696810 | -2.921683 | 4.742159  |
| 58 | 1 | 0.012357  | -2.641892 | 4.451450  |
| 59 | 1 | -0.849896 | -0.895595 | 5.972391  |
| 60 | 1 | -2.129824 | -0.488620 | 4.839413  |
| 61 | 6 | 5.006625  | -0.334182 | -0.124403 |
| 62 | 6 | 5.143528  | -1.708774 | -0.812443 |
| 63 | 6 | 6.343647  | 0.424556  | -0.211771 |
| 64 | 1 | 4.780406  | -0.496179 | 0.939084  |
| 65 | 6 | 6.300431  | -2.537297 | -0.233507 |
| 66 | 1 | 5.317015  | -1.550818 | -1.884716 |
| 67 | 1 | 4.212224  | -2.278516 | -0.734376 |
| 68 | 6 | 7.506811  | -0.398976 | 0.365608  |
| 69 | 1 | 6.560271  | 0.664847  | -1.260702 |
| 70 | 1 | 6.282763  | 1.376374  | 0.322231  |
| 71 | 6 | 7.627387  | -1.772969 | -0.301575 |
| 72 | 1 | 6.379508  | -3.487846 | -0.773224 |
| 73 | 1 | 6.079096  | -2.791761 | 0.811533  |
| 74 | 1 | 8.442653  | 0.160675  | 0.254612  |
| 75 | 1 | 7.352259  | -0.532036 | 1.444688  |
| 76 | 1 | 8.428181  | -2.355081 | 0.168065  |
| 77 | 1 | 7.914455  | -1.641240 | -1.353229 |
| 78 | 6 | 3.655588  | 2.306393  | -0.052319 |
| 79 | 6 | 4.467569  | 3.256859  | -0.959385 |
| 80 | 6 | 2.286171  | 2.942028  | 0.253653  |
| 81 | 1 | 4.188607  | 2.179951  | 0.900021  |
| 82 | 6 | 4.627063  | 4.652813  | -0.339519 |
| 83 | 1 | 3.949070  | 3.346707  | -1.922535 |
| 84 | 1 | 5.451826  | 2.838700  | -1.184312 |
| 85 | 6 | 2.431740  | 4.340733  | 0.874761  |
| 86 | 1 | 1.703307  | 3.019269  | -0.672644 |
| 87 | 1 | 1.709122  | 2.310376  | 0.933881  |
| 88 | 6 | 3.268726  | 5.277694  | -0.003039 |

|    |   |          |          |           |
|----|---|----------|----------|-----------|
| 89 | 1 | 5.184403 | 5.300514 | -1.025800 |
| 90 | 1 | 5.231374 | 4.577753 | 0.574520  |
| 91 | 1 | 1.437868 | 4.769042 | 1.047281  |
| 92 | 1 | 2.905083 | 4.248814 | 1.861627  |
| 93 | 1 | 3.404959 | 6.244322 | 0.495083  |
| 94 | 1 | 2.724943 | 5.481852 | -0.934717 |

#### INT-4.7:

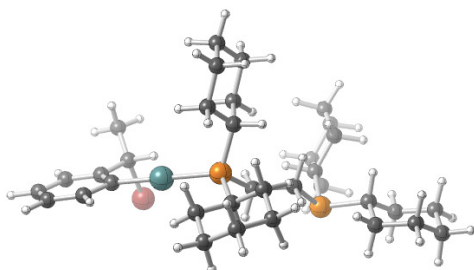

Charge = 0 Multiplicity = 1

Link 0: opt freq=noraman b3lyp/gen scrf=(smd,solvent=thf) pseudo=read  
 HF = -4782.8196715 hartrees (-3001267.17206297 kcal/mol)

Imaginary Frequencies: none found

Zero-point correction = 0.838076 (Hartree/Particle)

Temperature 298.150 Kelvin. Pressure 1.00000 Atm.

Sum of electronic and thermal Free Energies =

-4782.061142 hartrees (-3000791.18721642 kcal/mol)

Coordinates (from last standard orientation):

atom 25 is isolated, type=P

| Center<br>Number | Atomic<br>Number | Coordinates (Angstroms) |           |           |
|------------------|------------------|-------------------------|-----------|-----------|
|                  |                  | X                       | Y         | Z         |
| 1                | 6                | 6.272928                | -1.466255 | -0.718885 |
| 2                | 6                | 4.941768                | -1.123245 | -0.433086 |
| 3                | 6                | 4.475447                | 0.208395  | -0.564866 |
| 4                | 6                | 5.436175                | 1.156403  | -0.982625 |
| 5                | 6                | 6.760433                | 0.822363  | -1.267422 |
| 6                | 6                | 7.182350                | -0.501557 | -1.137846 |
| 7                | 1                | 5.141889                | 2.198526  | -1.094078 |
| 8                | 1                | 7.460860                | 1.587826  | -1.592616 |
| 9                | 1                | 8.208653                | -0.778491 | -1.360729 |
| 10               | 6                | 3.996580                | -2.176539 | 0.068566  |
| 11               | 6                | 4.490411                | -3.073842 | 1.188218  |
| 12               | 1                | 3.719666                | -3.781199 | 1.499766  |
| 13               | 1                | 5.382565                | -3.638852 | 0.912897  |

|    |    |           |           |           |
|----|----|-----------|-----------|-----------|
| 14 | 1  | 4.744559  | -2.447303 | 2.051092  |
| 15 | 1  | 6.604873  | -2.496679 | -0.626983 |
| 16 | 35 | 3.392585  | -3.408280 | -1.484812 |
| 17 | 29 | 2.639084  | 0.771439  | -0.226924 |
| 18 | 15 | 0.502157  | 1.456652  | 0.160614  |
| 19 | 6  | -0.716457 | 0.196354  | -0.477079 |
| 20 | 1  | -0.494318 | 0.118460  | -1.546785 |
| 21 | 1  | -0.403520 | -0.758638 | -0.047020 |
| 22 | 6  | -2.215663 | 0.438663  | -0.265090 |
| 23 | 1  | -2.496209 | 1.388876  | -0.721046 |
| 24 | 1  | -2.462306 | 0.508006  | 0.798929  |
| 25 | 15 | -3.279982 | -0.866450 | -1.107474 |
| 26 | 1  | 3.047937  | -1.713663 | 0.329290  |
| 27 | 6  | 0.036834  | 3.048735  | -0.729416 |
| 28 | 6  | -1.055277 | 3.916407  | -0.072677 |
| 29 | 6  | 1.284886  | 3.899205  | -1.047229 |
| 30 | 1  | -0.355817 | 2.678316  | -1.686020 |
| 31 | 6  | -1.410537 | 5.120818  | -0.959288 |
| 32 | 1  | -0.700372 | 4.284326  | 0.896154  |
| 33 | 1  | -1.953387 | 3.327745  | 0.129064  |
| 34 | 6  | 0.931803  | 5.111687  | -1.920068 |
| 35 | 1  | 1.742873  | 4.242989  | -0.111799 |
| 36 | 1  | 2.036477  | 3.282178  | -1.549798 |
| 37 | 6  | -0.175388 | 5.966483  | -1.291117 |
| 38 | 1  | -2.167545 | 5.733989  | -0.457763 |
| 39 | 1  | -1.868154 | 4.762652  | -1.890615 |
| 40 | 1  | 1.829121  | 5.716325  | -2.091944 |
| 41 | 1  | 0.601316  | 4.759060  | -2.905983 |
| 42 | 1  | -0.447626 | 6.788433  | -1.962278 |
| 43 | 1  | 0.202967  | 6.430473  | -0.370571 |
| 44 | 6  | 0.133366  | 1.671708  | 1.981804  |
| 45 | 6  | 0.207007  | 0.318057  | 2.717801  |
| 46 | 6  | 1.112389  | 2.678226  | 2.622171  |
| 47 | 1  | -0.885938 | 2.063245  | 2.076544  |
| 48 | 6  | -0.040674 | 0.478329  | 4.225565  |
| 49 | 1  | 1.198526  | -0.125336 | 2.557892  |
| 50 | 1  | -0.519122 | -0.386531 | 2.303056  |
| 51 | 6  | 0.857849  | 2.840109  | 4.127786  |
| 52 | 1  | 2.139567  | 2.325671  | 2.464638  |
| 53 | 1  | 1.041450  | 3.652264  | 2.130359  |
| 54 | 6  | 0.916049  | 1.494604  | 4.859226  |
| 55 | 1  | 0.057792  | -0.495777 | 4.717352  |
| 56 | 1  | -1.076497 | 0.804094  | 4.388314  |
| 57 | 1  | 1.591579  | 3.535518  | 4.549922  |
| 58 | 1  | -0.128081 | 3.298195  | 4.282270  |
| 59 | 1  | 0.679300  | 1.627257  | 5.920520  |

|    |   |           |           |           |
|----|---|-----------|-----------|-----------|
| 60 | 1 | 1.941069  | 1.103727  | 4.815443  |
| 61 | 6 | -3.020952 | -2.331579 | 0.062514  |
| 62 | 6 | -3.673572 | -2.241422 | 1.453434  |
| 63 | 6 | -3.347747 | -3.679295 | -0.613612 |
| 64 | 1 | -1.932089 | -2.319570 | 0.208767  |
| 65 | 6 | -3.269925 | -3.430512 | 2.341160  |
| 66 | 1 | -4.764331 | -2.235139 | 1.350458  |
| 67 | 1 | -3.402596 | -1.303062 | 1.948401  |
| 68 | 6 | -2.953115 | -4.867118 | 0.277629  |
| 69 | 1 | -4.419490 | -3.737414 | -0.836371 |
| 70 | 1 | -2.829825 | -3.746434 | -1.575984 |
| 71 | 6 | -3.589074 | -4.772435 | 1.670221  |
| 72 | 1 | -3.779025 | -3.360356 | 3.309373  |
| 73 | 1 | -2.193518 | -3.377337 | 2.551972  |
| 74 | 1 | -3.238889 | -5.807057 | -0.207757 |
| 75 | 1 | -1.860039 | -4.891749 | 0.380056  |
| 76 | 1 | -3.247316 | -5.601466 | 2.300078  |
| 77 | 1 | -4.678223 | -4.881801 | 1.580112  |
| 78 | 6 | -5.009850 | -0.209434 | -0.722266 |
| 79 | 6 | -5.243020 | 1.144529  | -1.426286 |
| 80 | 6 | -6.089413 | -1.221424 | -1.157586 |
| 81 | 1 | -5.092117 | -0.051414 | 0.360442  |
| 82 | 6 | -6.668203 | 1.676333  | -1.206816 |
| 83 | 1 | -5.063945 | 1.027117  | -2.503329 |
| 84 | 1 | -4.527390 | 1.891962  | -1.072991 |
| 85 | 6 | -7.513262 | -0.687274 | -0.936697 |
| 86 | 1 | -5.954135 | -1.454168 | -2.222091 |
| 87 | 1 | -5.968945 | -2.164402 | -0.618706 |
| 88 | 6 | -7.730517 | 0.658903  | -1.634878 |
| 89 | 1 | -6.796806 | 2.616423  | -1.755131 |
| 90 | 1 | -6.804682 | 1.916742  | -0.144033 |
| 91 | 1 | -8.240912 | -1.424350 | -1.294761 |
| 92 | 1 | -7.694578 | -0.571869 | 0.140256  |
| 93 | 1 | -8.733938 | 1.042606  | -1.419268 |
| 94 | 1 | -7.679656 | 0.515804  | -2.722393 |



**Calculated coordinates and energies (dCype, bidentate):**

B3LYP/6-311G(d):LANL2TZ(Cu)

**INT-4.1**

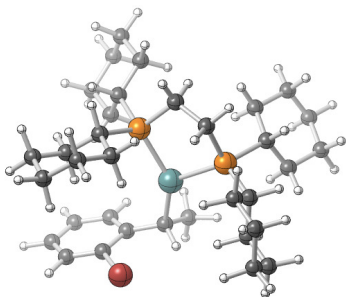

Charge = 0 Multiplicity = 1

Link 0: opt freq=noraman b3lyp/gen scrf=(smd,solvent=thf) pseudo=read

HF = -4782.800971 hartrees (-3001255.43731221 kcal/mol)

Imaginary Frequencies: none found

Zero-point correction = 0.836291 (Hartree/Particle)

Temperature 298.150 Kelvin. Pressure 1.00000 Atm.

Sum of electronic and thermal Free Energies =

-4782.044428 hartrees (-3000780.69901428 kcal/mol)

Coordinates (from last standard orientation):

| -----  |        |                         |           |           |
|--------|--------|-------------------------|-----------|-----------|
| Center | Atomic | Coordinates (Angstroms) |           |           |
| Number | Number | X                       | Y         | Z         |
| -----  |        |                         |           |           |
| 1      | 6      | 2.659918                | -0.129729 | -3.169762 |
| 2      | 6      | 1.877224                | 0.859280  | -2.509991 |
| 3      | 6      | 2.646643                | 1.932071  | -1.992104 |
| 4      | 6      | 4.031431                | 2.007706  | -2.071381 |
| 5      | 6      | 4.751744                | 0.993766  | -2.703667 |
| 6      | 6      | 4.044697                | -0.074302 | -3.258112 |
| 7      | 1      | 4.550206                | 2.861213  | -1.649087 |
| 8      | 1      | 5.833236                | 1.050907  | -2.768604 |
| 9      | 1      | 4.576627                | -0.870275 | -3.772330 |
| 10     | 6      | 0.418942                | 0.749874  | -2.405336 |
| 11     | 1      | -0.027712               | 1.745813  | -2.350580 |
| 12     | 6      | -0.265203               | -0.063702 | -3.511161 |
| 13     | 1      | -1.350950               | 0.062786  | -3.456004 |
| 14     | 1      | 0.039646                | 0.239913  | -4.527868 |
| 15     | 1      | -0.080643               | -1.141753 | -3.445355 |
| 16     | 1      | 2.145503                | -0.974269 | -3.614922 |
| 17     | 29     | -0.129371               | -0.041856 | -0.577831 |
| 18     | 15     | 0.702778                | -1.282876 | 1.269029  |
| 19     | 6      | -0.817517               | -1.670662 | 2.298416  |

|    |    |           |           |           |
|----|----|-----------|-----------|-----------|
| 20 | 1  | -1.197183 | -2.626268 | 1.939026  |
| 21 | 1  | -0.538543 | -1.825769 | 3.346075  |
| 22 | 6  | -1.934347 | -0.608371 | 2.218311  |
| 23 | 1  | -1.625015 | 0.272317  | 2.780336  |
| 24 | 1  | -2.836672 | -0.987925 | 2.710128  |
| 25 | 15 | -2.333514 | -0.003110 | 0.486872  |
| 26 | 35 | 1.763874  | 3.426964  | -1.115808 |
| 27 | 6  | -3.747970 | -1.131167 | -0.052462 |
| 28 | 6  | -4.347568 | -0.683332 | -1.400313 |
| 29 | 6  | -3.315921 | -2.607976 | -0.123052 |
| 30 | 1  | -4.522889 | -1.034250 | 0.720638  |
| 31 | 6  | -5.491699 | -1.602390 | -1.855335 |
| 32 | 1  | -3.559785 | -0.684119 | -2.163938 |
| 33 | 1  | -4.715922 | 0.343746  | -1.335503 |
| 34 | 6  | -4.460265 | -3.523685 | -0.584581 |
| 35 | 1  | -2.471121 | -2.704788 | -0.817202 |
| 36 | 1  | -2.961585 | -2.948929 | 0.852763  |
| 37 | 6  | -5.053070 | -3.068806 | -1.921852 |
| 38 | 1  | -5.859816 | -1.269363 | -2.832133 |
| 39 | 1  | -6.334315 | -1.505619 | -1.157848 |
| 40 | 1  | -4.096558 | -4.554734 | -0.658047 |
| 41 | 1  | -5.248832 | -3.527360 | 0.179624  |
| 42 | 1  | -5.898682 | -3.707302 | -2.200625 |
| 43 | 1  | -4.299916 | -3.186706 | -2.712008 |
| 44 | 6  | -3.250555 | 1.640015  | 0.749346  |
| 45 | 6  | -2.930154 | 2.369442  | 2.067343  |
| 46 | 6  | -2.984656 | 2.574037  | -0.450540 |
| 47 | 1  | -4.318628 | 1.387907  | 0.763300  |
| 48 | 6  | -3.697513 | 3.697349  | 2.180751  |
| 49 | 1  | -1.853228 | 2.571108  | 2.127639  |
| 50 | 1  | -3.181892 | 1.741812  | 2.926362  |
| 51 | 6  | -3.760640 | 3.893712  | -0.337370 |
| 52 | 1  | -1.910476 | 2.786883  | -0.498121 |
| 53 | 1  | -3.232451 | 2.072697  | -1.390468 |
| 54 | 6  | -3.449734 | 4.614605  | 0.978412  |
| 55 | 1  | -3.415304 | 4.202943  | 3.111126  |
| 56 | 1  | -4.771961 | 3.484385  | 2.258144  |
| 57 | 1  | -3.518968 | 4.536325  | -1.191214 |
| 58 | 1  | -4.838414 | 3.690820  | -0.396684 |
| 59 | 1  | -4.050589 | 5.526583  | 1.066671  |
| 60 | 1  | -2.399173 | 4.933848  | 0.975538  |
| 61 | 6  | 1.879144  | -0.469336 | 2.492747  |
| 62 | 6  | 3.245865  | -0.189473 | 1.837504  |
| 63 | 6  | 1.304270  | 0.823136  | 3.100469  |
| 64 | 1  | 2.022056  | -1.198267 | 3.302918  |
| 65 | 6  | 4.229312  | 0.460160  | 2.822887  |

|    |   |           |           |           |
|----|---|-----------|-----------|-----------|
| 66 | 1 | 3.100773  | 0.474683  | 0.977326  |
| 67 | 1 | 3.683131  | -1.111322 | 1.443534  |
| 68 | 6 | 2.287993  | 1.474264  | 4.086035  |
| 69 | 1 | 1.077786  | 1.532188  | 2.294271  |
| 70 | 1 | 0.361598  | 0.619070  | 3.615601  |
| 71 | 6 | 3.653302  | 1.738373  | 3.441878  |
| 72 | 1 | 5.171333  | 0.677847  | 2.307725  |
| 73 | 1 | 4.470103  | -0.255209 | 3.620675  |
| 74 | 1 | 1.859858  | 2.407787  | 4.468280  |
| 75 | 1 | 2.417756  | 0.814442  | 4.954154  |
| 76 | 1 | 4.348620  | 2.149695  | 4.182188  |
| 77 | 1 | 3.544486  | 2.501290  | 2.660354  |
| 78 | 6 | 1.566057  | -2.953442 | 0.993990  |
| 79 | 6 | 0.716725  | -4.206838 | 1.271892  |
| 80 | 6 | 2.155493  | -3.006777 | -0.430281 |
| 81 | 1 | 2.399187  | -2.961916 | 1.707565  |
| 82 | 6 | 1.522477  | -5.493561 | 1.028337  |
| 83 | 1 | -0.167392 | -4.212398 | 0.622284  |
| 84 | 1 | 0.350167  | -4.202920 | 2.302225  |
| 85 | 6 | 2.951718  | -4.295500 | -0.677728 |
| 86 | 1 | 1.335431  | -2.939379 | -1.156229 |
| 87 | 1 | 2.789592  | -2.134695 | -0.611818 |
| 88 | 6 | 2.113034  | -5.544375 | -0.384933 |
| 89 | 1 | 0.881707  | -6.364620 | 1.206036  |
| 90 | 1 | 2.335736  | -5.552836 | 1.763832  |
| 91 | 1 | 3.312791  | -4.311316 | -1.712051 |
| 92 | 1 | 3.845138  | -4.299052 | -0.039045 |
| 93 | 1 | 2.717804  | -6.449336 | -0.510757 |
| 94 | 1 | 1.296470  | -5.612646 | -1.116159 |

### TS-4.2

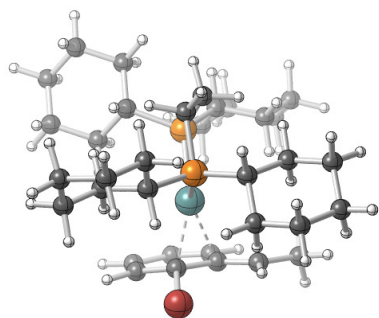

Charge = 0 Multiplicity = 1

Link 0: opt=(calcfc,ts,noeigen) freq=noraman b3lyp/gen scrf=(solvent=thf,smd)

pseudo=read

HF = -4782.7805125 hartrees (-3001242.59939888 kcal/mol)

Imaginary Frequencies: 1 (-77.7351 1/cm)

Zero-point correction = 0.835044 (Hartree/Particle)

Temperature 298.150 Kelvin. Pressure 1.00000 Atm.

Sum of electronic and thermal Free Energies =

-4782.021930 hartrees (-3000766.5812943 kcal/mol)

Coordinates (from last standard orientation):

| -----  |        |                         |           |           |
|--------|--------|-------------------------|-----------|-----------|
| Center | Atomic | Coordinates (Angstroms) |           |           |
| Number | Number | X                       | Y         | Z         |
| -----  |        |                         |           |           |
| 1      | 6      | -1.578668               | -2.185124 | 2.627282  |
| 2      | 6      | -0.179197               | -2.059102 | 2.213998  |
| 3      | 6      | 0.430533                | -0.785372 | 2.636552  |
| 4      | 6      | -0.255986               | 0.120251  | 3.481895  |
| 5      | 6      | -1.573794               | -0.072138 | 3.841448  |
| 6      | 6      | -2.219828               | -1.260162 | 3.404046  |
| 7      | 1      | 0.282810                | 0.988396  | 3.848383  |
| 8      | 1      | -2.099602               | 0.665530  | 4.437737  |
| 9      | 1      | -3.246842               | -1.450014 | 3.707019  |
| 10     | 6      | 0.467206                | -3.049470 | 1.498684  |
| 11     | 1      | 1.536026                | -2.954648 | 1.347211  |
| 12     | 6      | -0.173003               | -4.352083 | 1.095206  |
| 13     | 1      | 0.498216                | -4.926204 | 0.449322  |
| 14     | 1      | -0.415503               | -5.006063 | 1.948784  |
| 15     | 1      | -1.110886               | -4.226417 | 0.538016  |
| 16     | 1      | -2.091350               | -3.108495 | 2.377831  |
| 17     | 29     | -0.021132               | -0.344070 | 0.557684  |
| 18     | 15     | 1.609698                | 0.399380  | -0.984642 |
| 19     | 15     | -1.782922               | 0.334188  | -0.881661 |
| 20     | 35     | 2.400294                | -0.754647 | 2.876522  |
| 21     | 6      | -2.426029               | 2.088357  | -0.630064 |
| 22     | 6      | -3.534629               | 2.539163  | -1.599497 |
| 23     | 6      | -2.812627               | 2.385076  | 0.831901  |
| 24     | 1      | -1.533372               | 2.690570  | -0.848205 |
| 25     | 6      | -3.881062               | 4.023706  | -1.398480 |
| 26     | 1      | -4.436642               | 1.939807  | -1.433871 |
| 27     | 1      | -3.234841               | 2.370417  | -2.638665 |
| 28     | 6      | -3.163197               | 3.868128  | 1.026033  |
| 29     | 1      | -3.671059               | 1.770750  | 1.125522  |
| 30     | 1      | -1.992570               | 2.102433  | 1.498179  |
| 31     | 6      | -4.258760               | 4.327707  | 0.056331  |
| 32     | 1      | -4.699760               | 4.304888  | -2.070455 |
| 33     | 1      | -3.018385               | 4.638990  | -1.686520 |
| 34     | 1      | -3.475000               | 4.041267  | 2.062000  |
| 35     | 1      | -2.261703               | 4.475287  | 0.868707  |

|    |   |           |           |           |
|----|---|-----------|-----------|-----------|
| 36 | 1 | -4.451547 | 5.398999  | 0.181343  |
| 37 | 1 | -5.197822 | 3.813873  | 0.301348  |
| 38 | 6 | -3.245841 | -0.723897 | -1.406953 |
| 39 | 6 | -2.784306 | -2.127602 | -1.850409 |
| 40 | 6 | -4.298254 | -0.841358 | -0.285964 |
| 41 | 1 | -3.708009 | -0.226776 | -2.269220 |
| 42 | 6 | -3.971268 | -3.010223 | -2.267095 |
| 43 | 1 | -2.246052 | -2.607710 | -1.024518 |
| 44 | 1 | -2.080316 | -2.062044 | -2.684098 |
| 45 | 6 | -5.484407 | -1.722002 | -0.707885 |
| 46 | 1 | -3.827992 | -1.270404 | 0.606373  |
| 47 | 1 | -4.663363 | 0.147047  | 0.002464  |
| 48 | 6 | -5.025847 | -3.112213 | -1.160176 |
| 49 | 1 | -3.606693 | -4.006786 | -2.539994 |
| 50 | 1 | -4.432353 | -2.590586 | -3.171080 |
| 51 | 1 | -6.192299 | -1.805147 | 0.124340  |
| 52 | 1 | -6.026364 | -1.232424 | -1.528073 |
| 53 | 1 | -5.881903 | -3.703469 | -1.503877 |
| 54 | 1 | -4.599969 | -3.649375 | -0.302714 |
| 55 | 6 | 2.738882  | -0.761815 | -1.941237 |
| 56 | 6 | 3.887946  | -1.292470 | -1.062923 |
| 57 | 6 | 1.950473  | -1.931940 | -2.563688 |
| 58 | 1 | 3.168761  | -0.171823 | -2.760311 |
| 59 | 6 | 4.801963  | -2.252573 | -1.839300 |
| 60 | 1 | 3.468021  | -1.814100 | -0.195326 |
| 61 | 1 | 4.484928  | -0.466617 | -0.665709 |
| 62 | 6 | 2.868870  | -2.892401 | -3.335664 |
| 63 | 1 | 1.432455  | -2.483759 | -1.769721 |
| 64 | 1 | 1.176630  | -1.554466 | -3.238254 |
| 65 | 6 | 4.015718  | -3.411414 | -2.462067 |
| 66 | 1 | 5.579444  | -2.637008 | -1.169759 |
| 67 | 1 | 5.322752  | -1.698584 | -2.631868 |
| 68 | 1 | 2.277241  | -3.728489 | -3.724751 |
| 69 | 1 | 3.283968  | -2.373797 | -4.210094 |
| 70 | 1 | 4.682720  | -4.050882 | -3.050954 |
| 71 | 1 | 3.605646  | -4.042136 | -1.662691 |
| 72 | 6 | 2.739435  | 1.799588  | -0.444901 |
| 73 | 6 | 3.559837  | 2.464426  | -1.565057 |
| 74 | 6 | 1.964890  | 2.857615  | 0.366428  |
| 75 | 1 | 3.434722  | 1.311398  | 0.248185  |
| 76 | 6 | 4.497517  | 3.547069  | -1.006559 |
| 77 | 1 | 2.882644  | 2.921526  | -2.296942 |
| 78 | 1 | 4.149812  | 1.720444  | -2.107219 |
| 79 | 6 | 2.905692  | 3.937325  | 0.922791  |
| 80 | 1 | 1.212633  | 3.337690  | -0.271787 |
| 81 | 1 | 1.419915  | 2.375973  | 1.183646  |

|    |   |           |           |           |
|----|---|-----------|-----------|-----------|
| 82 | 6 | 3.736607  | 4.594713  | -0.185866 |
| 83 | 1 | 5.037166  | 4.027608  | -1.830528 |
| 84 | 1 | 5.258157  | 3.072041  | -0.373305 |
| 85 | 1 | 2.322366  | 4.693126  | 1.460386  |
| 86 | 1 | 3.578535  | 3.481964  | 1.660782  |
| 87 | 1 | 4.435525  | 5.320878  | 0.243637  |
| 88 | 1 | 3.070420  | 5.161381  | -0.850270 |
| 89 | 6 | 0.547956  | 1.175727  | -2.321860 |
| 90 | 6 | -0.838262 | 0.524191  | -2.486113 |
| 91 | 1 | 0.428944  | 2.231012  | -2.062683 |
| 92 | 1 | 1.078333  | 1.154095  | -3.278713 |
| 93 | 1 | -0.727227 | -0.477890 | -2.903751 |
| 94 | 1 | -1.429812 | 1.097775  | -3.206865 |

### INT-4.3

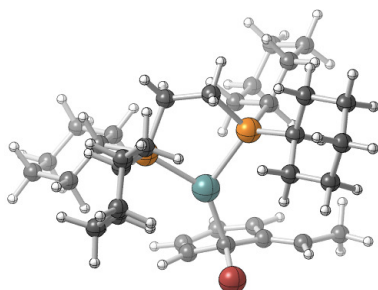

Charge = 0 Multiplicity = 1

Link 0: opt=(calcfc,ts,noeigen) freq=noraman b3lyp/gen scrf=(solvent=thf,smd)  
pseudo=read

HF = -4782.7805125 hartrees (-3001242.59939888 kcal/mol)

Imaginary Frequencies: 1 (-77.7351 1/cm)

Zero-point correction = 0.835044 (Hartree/Particle)

Temperature 298.150 Kelvin. Pressure 1.00000 Atm.

Sum of electronic and thermal Free Energies =

-4782.021930 hartrees (-3000766.5812943 kcal/mol)

Coordinates (from last standard orientation):

| Center<br>Number | Atomic<br>Number | Coordinates (Angstroms) |           |          |
|------------------|------------------|-------------------------|-----------|----------|
|                  |                  | X                       | Y         | Z        |
| 1                | 6                | -1.578668               | -2.185124 | 2.627282 |
| 2                | 6                | -0.179197               | -2.059102 | 2.213998 |
| 3                | 6                | 0.430533                | -0.785372 | 2.636552 |
| 4                | 6                | -0.255986               | 0.120251  | 3.481895 |
| 5                | 6                | -1.573794               | -0.072138 | 3.841448 |
| 6                | 6                | -2.219828               | -1.260162 | 3.404046 |

|    |    |           |           |           |
|----|----|-----------|-----------|-----------|
| 7  | 1  | 0.282810  | 0.988396  | 3.848383  |
| 8  | 1  | -2.099602 | 0.665530  | 4.437737  |
| 9  | 1  | -3.246842 | -1.450014 | 3.707019  |
| 10 | 6  | 0.467206  | -3.049470 | 1.498684  |
| 11 | 1  | 1.536026  | -2.954648 | 1.347211  |
| 12 | 6  | -0.173003 | -4.352083 | 1.095206  |
| 13 | 1  | 0.498216  | -4.926204 | 0.449322  |
| 14 | 1  | -0.415503 | -5.006063 | 1.948784  |
| 15 | 1  | -1.110886 | -4.226417 | 0.538016  |
| 16 | 1  | -2.091350 | -3.108495 | 2.377831  |
| 17 | 29 | -0.021132 | -0.344070 | 0.557684  |
| 18 | 15 | 1.609698  | 0.399380  | -0.984642 |
| 19 | 15 | -1.782922 | 0.334188  | -0.881661 |
| 20 | 35 | 2.400294  | -0.754647 | 2.876522  |
| 21 | 6  | -2.426029 | 2.088357  | -0.630064 |
| 22 | 6  | -3.534629 | 2.539163  | -1.599497 |
| 23 | 6  | -2.812627 | 2.385076  | 0.831901  |
| 24 | 1  | -1.533372 | 2.690570  | -0.848205 |
| 25 | 6  | -3.881062 | 4.023706  | -1.398480 |
| 26 | 1  | -4.436642 | 1.939807  | -1.433871 |
| 27 | 1  | -3.234841 | 2.370417  | -2.638665 |
| 28 | 6  | -3.163197 | 3.868128  | 1.026033  |
| 29 | 1  | -3.671059 | 1.770750  | 1.125522  |
| 30 | 1  | -1.992570 | 2.102433  | 1.498179  |
| 31 | 6  | -4.258760 | 4.327707  | 0.056331  |
| 32 | 1  | -4.699760 | 4.304888  | -2.070455 |
| 33 | 1  | -3.018385 | 4.638990  | -1.686520 |
| 34 | 1  | -3.475000 | 4.041267  | 2.062000  |
| 35 | 1  | -2.261703 | 4.475287  | 0.868707  |
| 36 | 1  | -4.451547 | 5.398999  | 0.181343  |
| 37 | 1  | -5.197822 | 3.813873  | 0.301348  |
| 38 | 6  | -3.245841 | -0.723897 | -1.406953 |
| 39 | 6  | -2.784306 | -2.127602 | -1.850409 |
| 40 | 6  | -4.298254 | -0.841358 | -0.285964 |
| 41 | 1  | -3.708009 | -0.226776 | -2.269220 |
| 42 | 6  | -3.971268 | -3.010223 | -2.267095 |
| 43 | 1  | -2.246052 | -2.607710 | -1.024518 |
| 44 | 1  | -2.080316 | -2.062044 | -2.684098 |
| 45 | 6  | -5.484407 | -1.722002 | -0.707885 |
| 46 | 1  | -3.827992 | -1.270404 | 0.606373  |
| 47 | 1  | -4.663363 | 0.147047  | 0.002464  |
| 48 | 6  | -5.025847 | -3.112213 | -1.160176 |
| 49 | 1  | -3.606693 | -4.006786 | -2.539994 |
| 50 | 1  | -4.432353 | -2.590586 | -3.171080 |
| 51 | 1  | -6.192299 | -1.805147 | 0.124340  |
| 52 | 1  | -6.026364 | -1.232424 | -1.528073 |

|    |   |           |           |           |
|----|---|-----------|-----------|-----------|
| 53 | 1 | -5.881903 | -3.703469 | -1.503877 |
| 54 | 1 | -4.599969 | -3.649375 | -0.302714 |
| 55 | 6 | 2.738882  | -0.761815 | -1.941237 |
| 56 | 6 | 3.887946  | -1.292470 | -1.062923 |
| 57 | 6 | 1.950473  | -1.931940 | -2.563688 |
| 58 | 1 | 3.168761  | -0.171823 | -2.760311 |
| 59 | 6 | 4.801963  | -2.252573 | -1.839300 |
| 60 | 1 | 3.468021  | -1.814100 | -0.195326 |
| 61 | 1 | 4.484928  | -0.466617 | -0.665709 |
| 62 | 6 | 2.868870  | -2.892401 | -3.335664 |
| 63 | 1 | 1.432455  | -2.483759 | -1.769721 |
| 64 | 1 | 1.176630  | -1.554466 | -3.238254 |
| 65 | 6 | 4.015718  | -3.411414 | -2.462067 |
| 66 | 1 | 5.579444  | -2.637008 | -1.169759 |
| 67 | 1 | 5.322752  | -1.698584 | -2.631868 |
| 68 | 1 | 2.277241  | -3.728489 | -3.724751 |
| 69 | 1 | 3.283968  | -2.373797 | -4.210094 |
| 70 | 1 | 4.682720  | -4.050882 | -3.050954 |
| 71 | 1 | 3.605646  | -4.042136 | -1.662691 |
| 72 | 6 | 2.739435  | 1.799588  | -0.444901 |
| 73 | 6 | 3.559837  | 2.464426  | -1.565057 |
| 74 | 6 | 1.964890  | 2.857615  | 0.366428  |
| 75 | 1 | 3.434722  | 1.311398  | 0.248185  |
| 76 | 6 | 4.497517  | 3.547069  | -1.006559 |
| 77 | 1 | 2.882644  | 2.921526  | -2.296942 |
| 78 | 1 | 4.149812  | 1.720444  | -2.107219 |
| 79 | 6 | 2.905692  | 3.937325  | 0.922791  |
| 80 | 1 | 1.212633  | 3.337690  | -0.271787 |
| 81 | 1 | 1.419915  | 2.375973  | 1.183646  |
| 82 | 6 | 3.736607  | 4.594713  | -0.185866 |
| 83 | 1 | 5.037166  | 4.027608  | -1.830528 |
| 84 | 1 | 5.258157  | 3.072041  | -0.373305 |
| 85 | 1 | 2.322366  | 4.693126  | 1.460386  |
| 86 | 1 | 3.578535  | 3.481964  | 1.660782  |
| 87 | 1 | 4.435525  | 5.320878  | 0.243637  |
| 88 | 1 | 3.070420  | 5.161381  | -0.850270 |
| 89 | 6 | 0.547956  | 1.175727  | -2.321860 |
| 90 | 6 | -0.838262 | 0.524191  | -2.486113 |
| 91 | 1 | 0.428944  | 2.231012  | -2.062683 |
| 92 | 1 | 1.078333  | 1.154095  | -3.278713 |
| 93 | 1 | -0.727227 | -0.477890 | -2.903751 |
| 94 | 1 | -1.429812 | 1.097775  | -3.206865 |



### TS-4.4

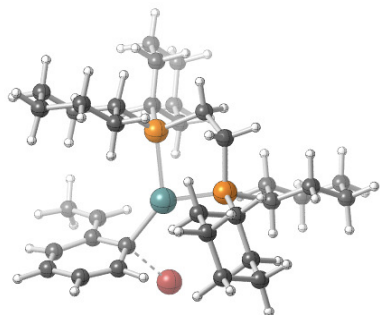

Charge = 0 Multiplicity = 1

Link 0: opt=(calcfc,ts,noeigen) freq=noraman b3lyp/gen scrf=(smd,solvent=thf)  
pseudo=read

HF = -4782.7772618 hartrees (-3001240.55955212 kcal/mol)

Imaginary Frequencies: 1 (-48.3289 1/cm)

Zero-point correction = 0.834769 (Hartree/Particle)

Temperature 298.150 Kelvin. Pressure 1.00000 Atm.

Sum of electronic and thermal Free Energies =

-4782.020819 hartrees (-3000765.88413069 kcal/mol)

Coordinates (from last standard orientation):

| -----  |        |                         |          |           |
|--------|--------|-------------------------|----------|-----------|
| Center | Atomic | Coordinates (Angstroms) |          |           |
| Number | Number | X                       | Y        | Z         |
| -----  |        |                         |          |           |
| 1      | 6      | 0.436096                | 1.803506 | -2.053610 |
| 2      | 6      | -0.999258               | 1.287522 | -2.277167 |
| 3      | 15     | -1.837504               | 0.565452 | -0.763986 |
| 4      | 6      | -2.716059               | 2.001685 | 0.071747  |
| 5      | 1      | -3.325480               | 1.503468 | 0.835819  |
| 6      | 6      | -3.653462               | 2.834913 | -0.819778 |
| 7      | 6      | -4.389612               | 3.909397 | -0.002154 |
| 8      | 6      | -3.413490               | 4.812790 | 0.761118  |
| 9      | 6      | -2.456382               | 3.990383 | 1.632497  |
| 10     | 6      | -1.723526               | 2.913898 | 0.817557  |
| 11     | 1      | -1.086958               | 2.315053 | 1.475586  |
| 12     | 1      | -1.059847               | 3.403475 | 0.095223  |
| 13     | 1      | -3.022941               | 3.506614 | 2.438463  |
| 14     | 1      | -1.726031               | 4.646513 | 2.119052  |
| 15     | 1      | -3.965056               | 5.530712 | 1.378178  |
| 16     | 1      | -2.832319               | 5.405370 | 0.041726  |
| 17     | 1      | -5.064045               | 3.418171 | 0.711160  |

|    |    |           |           |           |
|----|----|-----------|-----------|-----------|
| 18 | 1  | -5.023426 | 4.508728  | -0.665526 |
| 19 | 1  | -3.072068 | 3.326235  | -1.608978 |
| 20 | 1  | -4.383024 | 2.193263  | -1.322140 |
| 21 | 6  | -3.231737 | -0.423693 | -1.554948 |
| 22 | 1  | -3.671854 | 0.212074  | -2.334628 |
| 23 | 6  | -2.690559 | -1.703041 | -2.225741 |
| 24 | 6  | -3.812621 | -2.518134 | -2.886133 |
| 25 | 6  | -4.921082 | -2.868536 | -1.887301 |
| 26 | 6  | -5.456723 | -1.611734 | -1.192858 |
| 27 | 6  | -4.335617 | -0.786140 | -0.541773 |
| 28 | 1  | -4.765503 | 0.115718  | -0.098187 |
| 29 | 1  | -3.896351 | -1.358728 | 0.284758  |
| 30 | 1  | -5.983335 | -0.987638 | -1.927031 |
| 31 | 1  | -6.197052 | -1.884021 | -0.432450 |
| 32 | 1  | -5.735735 | -3.398915 | -2.392816 |
| 33 | 1  | -4.523011 | -3.558960 | -1.132180 |
| 34 | 1  | -4.238847 | -1.941296 | -3.717580 |
| 35 | 1  | -3.393018 | -3.430134 | -3.325266 |
| 36 | 1  | -1.932210 | -1.460023 | -2.975382 |
| 37 | 1  | -2.191964 | -2.321859 | -1.470023 |
| 38 | 29 | -0.025198 | -0.445108 | 0.415004  |
| 39 | 15 | 1.533095  | 0.690060  | -1.015000 |
| 40 | 6  | 2.847500  | 1.869511  | -0.368736 |
| 41 | 6  | 3.556880  | 2.719132  | -1.439472 |
| 42 | 6  | 4.659260  | 3.596272  | -0.823513 |
| 43 | 6  | 4.121242  | 4.475240  | 0.311290  |
| 44 | 6  | 3.404919  | 3.635112  | 1.375209  |
| 45 | 6  | 2.299173  | 2.760860  | 0.763162  |
| 46 | 1  | 1.506503  | 3.411741  | 0.375191  |
| 47 | 1  | 1.840685  | 2.140743  | 1.539729  |
| 48 | 1  | 4.135043  | 2.989705  | 1.880533  |
| 49 | 1  | 2.977044  | 4.283040  | 2.148098  |
| 50 | 1  | 3.419339  | 5.211925  | -0.102123 |
| 51 | 1  | 4.936872  | 5.047634  | 0.766751  |
| 52 | 1  | 5.458581  | 2.951172  | -0.435849 |
| 53 | 1  | 5.114475  | 4.217465  | -1.603150 |
| 54 | 1  | 3.990509  | 2.081853  | -2.215479 |
| 55 | 1  | 2.825308  | 3.365670  | -1.938903 |
| 56 | 1  | 3.587650  | 1.198665  | 0.083564  |
| 57 | 6  | 2.457490  | -0.353690 | -2.277961 |
| 58 | 6  | 1.514904  | -1.361250 | -2.966975 |
| 59 | 6  | 2.260494  | -2.245307 | -3.978439 |
| 60 | 6  | 3.448660  | -2.968639 | -3.336064 |
| 61 | 6  | 4.390646  | -1.974694 | -2.648695 |
| 62 | 6  | 3.649741  | -1.089978 | -1.634781 |
| 63 | 1  | 4.355125  | -0.377181 | -1.198942 |

|    |    |           |           |           |
|----|----|-----------|-----------|-----------|
| 64 | 1  | 3.286040  | -1.712455 | -0.808299 |
| 65 | 1  | 5.203845  | -2.507000 | -2.142818 |
| 66 | 1  | 4.862775  | -1.336447 | -3.407509 |
| 67 | 1  | 3.078069  | -3.688871 | -2.594913 |
| 68 | 1  | 3.992269  | -3.549532 | -4.089606 |
| 69 | 1  | 1.563145  | -2.969423 | -4.414336 |
| 70 | 1  | 2.619415  | -1.622578 | -4.808709 |
| 71 | 1  | 1.049504  | -1.998459 | -2.204983 |
| 72 | 1  | 0.702566  | -0.836877 | -3.477609 |
| 73 | 1  | 2.840561  | 0.332440  | -3.043609 |
| 74 | 6  | 2.343862  | -1.106090 | 2.857515  |
| 75 | 6  | 3.704373  | -1.168343 | 3.480213  |
| 76 | 1  | 4.183901  | -2.145324 | 3.405227  |
| 77 | 1  | 4.378564  | -0.436946 | 3.016709  |
| 78 | 1  | 3.666284  | -0.904634 | 4.546572  |
| 79 | 6  | 1.570509  | -2.130897 | 2.406920  |
| 80 | 6  | 2.036882  | -3.517145 | 2.424827  |
| 81 | 6  | 1.315480  | -4.528594 | 1.884439  |
| 82 | 6  | 0.002333  | -4.295036 | 1.337659  |
| 83 | 6  | -0.550411 | -3.054425 | 1.419197  |
| 84 | 6  | 0.199344  | -1.881611 | 1.839794  |
| 85 | 35 | -1.073515 | -0.995995 | 3.406568  |
| 86 | 1  | -1.577942 | -2.904168 | 1.104509  |
| 87 | 1  | -0.549817 | -5.119263 | 0.895028  |
| 88 | 1  | 1.703001  | -5.543672 | 1.908784  |
| 89 | 1  | 2.979011  | -3.744012 | 2.912686  |
| 90 | 1  | 1.904024  | -0.111586 | 2.822363  |
| 91 | 1  | -1.611959 | 2.083639  | -2.709585 |
| 92 | 1  | -0.985671 | 0.484316  | -3.016737 |
| 93 | 1  | 0.402924  | 2.762477  | -1.530591 |
| 94 | 1  | 0.906851  | 1.997944  | -3.022277 |

#### INT-4.5

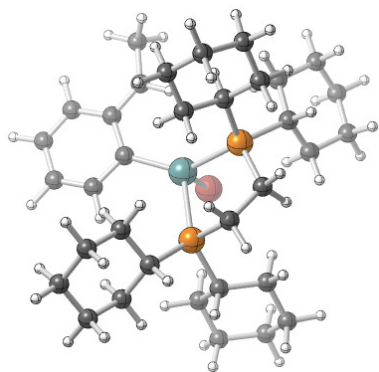

Charge = 0 Multiplicity = 1

Link 0: opt freq=noraman b3lyp/gen scrf=(smd,solvent=thf) pseudo=read

HF = -4782.7899656 hartrees (-3001248.53131366 kcal/mol)

Imaginary Frequencies: none found

Zero-point correction = 0.835762 (Hartree/Particle)

Temperature 298.150 Kelvin. Pressure 1.00000 Atm.

Sum of electronic and thermal Free Energies =

-4782.035211 hartrees (-3000774.91525461 kcal/mol)

Coordinates (from last standard orientation):

| -----  |        |                         |           |           |
|--------|--------|-------------------------|-----------|-----------|
| Center | Atomic | Coordinates (Angstroms) |           |           |
| Number | Number | X                       | Y         | Z         |
| -----  |        |                         |           |           |
| 1      | 6      | 0.197103                | -3.015664 | 4.131387  |
| 2      | 6      | 0.608945                | -2.218617 | 2.997188  |
| 3      | 6      | -0.360311               | -1.558844 | 2.119942  |
| 4      | 6      | -1.713920               | -1.795165 | 2.477657  |
| 5      | 6      | -2.090361               | -2.600991 | 3.534313  |
| 6      | 6      | -1.127472               | -3.214094 | 4.381787  |
| 7      | 1      | -2.498617               | -1.325203 | 1.892399  |
| 8      | 1      | -3.145468               | -2.768527 | 3.736524  |
| 9      | 1      | -1.452689               | -3.820446 | 5.220415  |
| 10     | 6      | 1.944314                | -2.059717 | 2.696208  |
| 11     | 6      | 3.135760                | -2.546454 | 3.420519  |
| 12     | 1      | 3.768835                | -1.687383 | 3.678803  |
| 13     | 1      | 2.928589                | -3.114110 | 4.325786  |
| 14     | 1      | 3.747958                | -3.159207 | 2.745988  |
| 15     | 1      | 0.940846                | -3.456982 | 4.785242  |
| 16     | 35     | 0.254157                | 1.884449  | 2.426782  |
| 17     | 29     | 0.068791                | -0.150121 | 0.786347  |
| 18     | 15     | -1.806693               | 0.382953  | -0.962757 |
| 19     | 6      | -0.819247               | 0.313275  | -2.561752 |
| 20     | 1      | -0.836972               | -0.732395 | -2.873640 |
| 21     | 1      | -1.345040               | 0.869535  | -3.345222 |
| 22     | 6      | 0.638403                | 0.797774  | -2.476637 |
| 23     | 1      | 0.655678                | 1.882523  | -2.364729 |
| 24     | 1      | 1.156619                | 0.578900  | -3.415708 |
| 25     | 15     | 1.605292                | 0.128695  | -1.022388 |
| 26     | 1      | 2.146807                | -1.477128 | 1.800588  |
| 27     | 6      | -3.213302               | -0.775751 | -1.498832 |
| 28     | 6      | -2.758789               | -2.249027 | -1.452941 |
| 29     | 6      | -4.517153               | -0.606265 | -0.696652 |
| 30     | 1      | -3.429750               | -0.514159 | -2.544709 |
| 31     | 6      | -3.854285               | -3.205428 | -1.948633 |
| 32     | 1      | -2.493587               | -2.510508 | -0.422199 |
| 33     | 1      | -1.853859               | -2.397542 | -2.048001 |

|    |   |           |           |           |
|----|---|-----------|-----------|-----------|
| 34 | 6 | -5.615983 | -1.564650 | -1.185056 |
| 35 | 1 | -4.321965 | -0.793853 | 0.366739  |
| 36 | 1 | -4.884949 | 0.419740  | -0.770476 |
| 37 | 6 | -5.158265 | -3.026660 | -1.163907 |
| 38 | 1 | -3.501504 | -4.240146 | -1.871015 |
| 39 | 1 | -4.042491 | -3.021397 | -3.014736 |
| 40 | 1 | -6.513129 | -1.436525 | -0.568863 |
| 41 | 1 | -5.902869 | -1.289703 | -2.208783 |
| 42 | 1 | -5.941252 | -3.676579 | -1.570606 |
| 43 | 1 | -5.001192 | -3.343025 | -0.124148 |
| 44 | 6 | -2.643322 | 2.080411  | -1.020981 |
| 45 | 6 | -3.196445 | 2.444822  | 0.373548  |
| 46 | 6 | -1.714157 | 3.204776  | -1.517814 |
| 47 | 1 | -3.478689 | 1.997849  | -1.730601 |
| 48 | 6 | -3.911853 | 3.804092  | 0.372897  |
| 49 | 1 | -2.361014 | 2.467873  | 1.081864  |
| 50 | 1 | -3.880661 | 1.672450  | 0.734285  |
| 51 | 6 | -2.424787 | 4.568007  | -1.521766 |
| 52 | 1 | -0.832907 | 3.260385  | -0.868513 |
| 53 | 1 | -1.354052 | 2.989751  | -2.527459 |
| 54 | 6 | -2.999622 | 4.921241  | -0.145760 |
| 55 | 1 | -4.257064 | 4.037281  | 1.386611  |
| 56 | 1 | -4.811809 | 3.747848  | -0.255063 |
| 57 | 1 | -1.724977 | 5.344140  | -1.852537 |
| 58 | 1 | -3.236985 | 4.548835  | -2.261255 |
| 59 | 1 | -3.545612 | 5.870460  | -0.194473 |
| 60 | 1 | -2.175196 | 5.071202  | 0.562916  |
| 61 | 6 | 3.075119  | 1.306447  | -0.944534 |
| 62 | 6 | 2.652702  | 2.751092  | -0.607163 |
| 63 | 6 | 4.124491  | 0.809331  | 0.071216  |
| 64 | 1 | 3.532612  | 1.309896  | -1.941829 |
| 65 | 6 | 3.865233  | 3.691957  | -0.521453 |
| 66 | 1 | 2.110492  | 2.755719  | 0.344158  |
| 67 | 1 | 1.962105  | 3.136097  | -1.363212 |
| 68 | 6 | 5.333796  | 1.753211  | 0.156518  |
| 69 | 1 | 3.655446  | 0.737030  | 1.060099  |
| 70 | 1 | 4.470845  | -0.195677 | -0.187266 |
| 71 | 6 | 4.911096  | 3.189780  | 0.479418  |
| 72 | 1 | 3.526698  | 4.696604  | -0.243951 |
| 73 | 1 | 4.328722  | 3.784644  | -1.513388 |
| 74 | 1 | 6.035686  | 1.382267  | 0.912205  |
| 75 | 1 | 5.872835  | 1.738255  | -0.800251 |
| 76 | 1 | 5.784505  | 3.851675  | 0.483211  |
| 77 | 1 | 4.489406  | 3.224624  | 1.492126  |
| 78 | 6 | 2.394944  | -1.474135 | -1.635223 |
| 79 | 6 | 1.349914  | -2.590412 | -1.826040 |

|    |   |          |           |           |
|----|---|----------|-----------|-----------|
| 80 | 6 | 3.297394 | -1.365492 | -2.878413 |
| 81 | 1 | 3.026419 | -1.773889 | -0.788438 |
| 82 | 6 | 2.013132 | -3.936395 | -2.155268 |
| 83 | 1 | 0.674239 | -2.322454 | -2.646186 |
| 84 | 1 | 0.732186 | -2.683489 | -0.928064 |
| 85 | 6 | 3.957562 | -2.713485 | -3.215297 |
| 86 | 1 | 2.701709 | -1.035917 | -3.738459 |
| 87 | 1 | 4.076256 | -0.611946 | -2.732828 |
| 88 | 6 | 2.924455 | -3.832970 | -3.384138 |
| 89 | 1 | 1.241879 | -4.698194 | -2.315754 |
| 90 | 1 | 2.602544 | -4.270403 | -1.291025 |
| 91 | 1 | 4.559632 | -2.610743 | -4.125259 |
| 92 | 1 | 4.655500 | -2.982502 | -2.411442 |
| 93 | 1 | 3.427146 | -4.789218 | -3.567315 |
| 94 | 1 | 2.312180 | -3.629242 | -4.272869 |

### TS-4.6

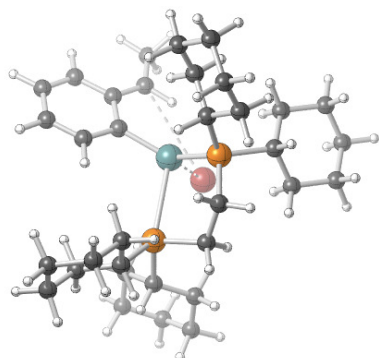

Charge = 0 Multiplicity = 1

Link 0: opt=(calcfc,ts,noeigen) freq=noraman b3lyp/gen scrf=(solvent=thf,smd)  
pseudo=read

HF = -4782.7907027 hartrees (-3001248.99385128 kcal/mol)

Imaginary Frequencies: 1 (-35.4837 1/cm)

Zero-point correction = 0.835979 (Hartree/Particle)

Temperature 298.150 Kelvin. Pressure 1.00000 Atm.

Sum of electronic and thermal Free Energies =

-4782.034699 hartrees (-3000774.59396949 kcal/mol)

Coordinates (from last standard orientation):

| -----  |        |                         |          |          |  |
|--------|--------|-------------------------|----------|----------|--|
| Center | Atomic | Coordinates (Angstroms) |          |          |  |
| Number | Number | X                       | Y        | Z        |  |
| -----  |        |                         |          |          |  |
| 1      | 6      | -0.697286               | 1.327040 | 5.010291 |  |
| 2      | 6      | -0.903315               | 0.529025 | 3.823675 |  |

|    |    |           |           |           |
|----|----|-----------|-----------|-----------|
| 3  | 6  | -0.193312 | 0.805821  | 2.575447  |
| 4  | 6  | 0.697829  | 1.907900  | 2.647348  |
| 5  | 6  | 0.891187  | 2.653137  | 3.795180  |
| 6  | 6  | 0.185257  | 2.366499  | 4.993702  |
| 7  | 1  | 1.266358  | 2.176912  | 1.761994  |
| 8  | 1  | 1.597726  | 3.479558  | 3.789801  |
| 9  | 1  | 0.352554  | 2.970782  | 5.878832  |
| 10 | 6  | -1.772888 | -0.544702 | 3.835210  |
| 11 | 6  | -2.610089 | -1.058115 | 4.937066  |
| 12 | 1  | -2.354673 | -2.110581 | 5.116429  |
| 13 | 1  | -2.539621 | -0.510636 | 5.874968  |
| 14 | 1  | -3.658176 | -1.075252 | 4.609765  |
| 15 | 1  | -1.243599 | 1.101410  | 5.918996  |
| 16 | 35 | -0.262192 | -2.782134 | 1.209292  |
| 17 | 29 | -0.377635 | -0.218500 | 0.901806  |
| 18 | 15 | 2.070611  | 0.133108  | -0.852328 |
| 19 | 6  | 1.076666  | -0.230307 | -2.404188 |
| 20 | 1  | 1.676275  | -0.025169 | -3.298731 |
| 21 | 1  | 0.879531  | -1.302567 | -2.403165 |
| 22 | 6  | -0.259332 | 0.529135  | -2.505226 |
| 23 | 1  | -0.738030 | 0.290943  | -3.460372 |
| 24 | 1  | -0.084237 | 1.605643  | -2.515000 |
| 25 | 15 | -1.483080 | 0.224869  | -1.117325 |
| 26 | 1  | -1.838146 | -1.102911 | 2.904138  |
| 27 | 6  | 3.192843  | 1.549553  | -1.439667 |
| 28 | 6  | 2.404839  | 2.789599  | -1.900818 |
| 29 | 6  | 4.206155  | 1.936280  | -0.343266 |
| 30 | 1  | 3.751006  | 1.161723  | -2.303722 |
| 31 | 6  | 3.329193  | 3.941620  | -2.326543 |
| 32 | 1  | 1.749550  | 3.131675  | -1.088668 |
| 33 | 1  | 1.753982  | 2.533914  | -2.740514 |
| 34 | 6  | 5.128831  | 3.084399  | -0.778974 |
| 35 | 1  | 3.660750  | 2.238222  | 0.560421  |
| 36 | 1  | 4.813790  | 1.072219  | -0.061075 |
| 37 | 6  | 4.330865  | 4.312556  | -1.228336 |
| 38 | 1  | 2.725260  | 4.813319  | -2.603624 |
| 39 | 1  | 3.878114  | 3.646184  | -3.230501 |
| 40 | 1  | 5.801942  | 3.347182  | 0.045093  |
| 41 | 1  | 5.768757  | 2.744390  | -1.604115 |
| 42 | 1  | 5.006720  | 5.100506  | -1.579401 |
| 43 | 1  | 3.789807  | 4.727839  | -0.367498 |
| 44 | 6  | 3.361347  | -1.267270 | -0.788054 |
| 45 | 6  | 3.711473  | -1.569121 | 0.685098  |
| 46 | 6  | 2.973217  | -2.569904 | -1.511038 |
| 47 | 1  | 4.258098  | -0.871428 | -1.283366 |
| 48 | 6  | 4.820884  | -2.623365 | 0.809373  |

|    |   |           |           |           |
|----|---|-----------|-----------|-----------|
| 49 | 1 | 2.807010  | -1.926954 | 1.188836  |
| 50 | 1 | 4.011498  | -0.653233 | 1.204058  |
| 51 | 6 | 4.078928  | -3.632410 | -1.387290 |
| 52 | 1 | 2.043327  | -2.961551 | -1.083213 |
| 53 | 1 | 2.783944  | -2.378703 | -2.571281 |
| 54 | 6 | 4.451802  | -3.915512 | 0.072563  |
| 55 | 1 | 5.015723  | -2.832215 | 1.867617  |
| 56 | 1 | 5.756776  | -2.222141 | 0.396133  |
| 57 | 1 | 3.755498  | -4.555561 | -1.882125 |
| 58 | 1 | 4.971315  | -3.288143 | -1.927961 |
| 59 | 1 | 5.279149  | -4.633125 | 0.119787  |
| 60 | 1 | 3.600587  | -4.388425 | 0.578401  |
| 61 | 6 | -2.685068 | -1.007870 | -1.878329 |
| 62 | 6 | -1.956313 | -2.260724 | -2.405667 |
| 63 | 6 | -3.793848 | -1.413059 | -0.886655 |
| 64 | 1 | -3.148320 | -0.500863 | -2.734465 |
| 65 | 6 | -2.939388 | -3.266164 | -3.025727 |
| 66 | 1 | -1.416300 | -2.736374 | -1.579934 |
| 67 | 1 | -1.212032 | -1.981718 | -3.157098 |
| 68 | 6 | -4.773635 | -2.422137 | -1.505765 |
| 69 | 1 | -3.328758 | -1.855124 | 0.001907  |
| 70 | 1 | -4.347168 | -0.533393 | -0.547139 |
| 71 | 6 | -4.049891 | -3.660481 | -2.045519 |
| 72 | 1 | -2.391405 | -4.155806 | -3.356222 |
| 73 | 1 | -3.389626 | -2.827653 | -3.926805 |
| 74 | 1 | -5.521068 | -2.713009 | -0.758815 |
| 75 | 1 | -5.324758 | -1.938151 | -2.323473 |
| 76 | 1 | -4.763046 | -4.336693 | -2.530604 |
| 77 | 1 | -3.611692 | -4.218011 | -1.207835 |
| 78 | 6 | -2.370852 | 1.891231  | -1.104684 |
| 79 | 6 | -3.149335 | 2.244458  | -2.385384 |
| 80 | 6 | -3.242342 | 2.129326  | 0.142401  |
| 81 | 1 | -1.520186 | 2.582982  | -1.026453 |
| 82 | 6 | -3.676194 | 3.688391  | -2.341739 |
| 83 | 1 | -3.999546 | 1.561519  | -2.496685 |
| 84 | 1 | -2.522163 | 2.109103  | -3.272027 |
| 85 | 6 | -3.756946 | 3.576461  | 0.188473  |
| 86 | 1 | -4.099981 | 1.447270  | 0.139335  |
| 87 | 1 | -2.667302 | 1.904864  | 1.044995  |
| 88 | 6 | -4.520596 | 3.949371  | -1.088566 |
| 89 | 1 | -4.262641 | 3.894548  | -3.244441 |
| 90 | 1 | -2.826171 | 4.383161  | -2.359607 |
| 91 | 1 | -4.396527 | 3.714874  | 1.067433  |
| 92 | 1 | -2.904809 | 4.257257  | 0.315013  |
| 93 | 1 | -4.831254 | 4.999602  | -1.053404 |
| 94 | 1 | -5.442742 | 3.355356  | -1.143768 |



## INT-4.7

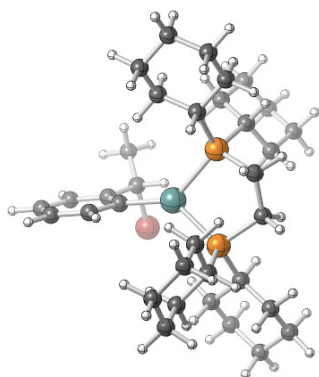

Charge = 0 Multiplicity = 1

Link 0: opt freq=noraman b3lyp/gen scrf=(smd,solvent=thf) pseudo=read

HF = -4782.8186022 hartrees (-3001266.50106652 kcal/mol)

Imaginary Frequencies: none found

Zero-point correction = 0.837889 (Hartree/Particle)

Temperature 298.150 Kelvin. Pressure 1.00000 Atm.

Sum of electronic and thermal Free Energies =

-4782.059358 hartrees (-3000790.06773858 kcal/mol)

Coordinates (from last standard orientation):

| Center<br>Number | Atomic<br>Number | Coordinates (Angstroms) |           |           |
|------------------|------------------|-------------------------|-----------|-----------|
|                  |                  | X                       | Y         | Z         |
| 1                | 6                | 0.226731                | 3.072027  | 3.628695  |
| 2                | 6                | 0.263805                | 2.409440  | 2.390158  |
| 3                | 6                | -0.010970               | 1.023449  | 2.270487  |
| 4                | 6                | -0.301729               | 0.365623  | 3.490122  |
| 5                | 6                | -0.335311               | 1.012879  | 4.725175  |
| 6                | 6                | -0.074373               | 2.383050  | 4.797434  |
| 7                | 1                | -0.517409               | -0.701994 | 3.478549  |
| 8                | 1                | -0.570675               | 0.455445  | 5.629173  |
| 9                | 1                | -0.105813               | 2.904392  | 5.749868  |
| 10               | 6                | 0.668712                | 3.169956  | 1.163006  |
| 11               | 6                | 1.937974                | 3.996587  | 1.256636  |
| 12               | 1                | 2.177508                | 4.474709  | 0.304861  |
| 13               | 1                | 1.875577                | 4.771906  | 2.022384  |
| 14               | 1                | 2.767875                | 3.332471  | 1.523277  |
| 15               | 1                | 0.423284                | 4.139779  | 3.682020  |
| 16               | 35               | -0.844766               | 4.455861  | 0.556897  |
| 17               | 29               | 0.015540                | -0.037881 | 0.584788  |
| 18               | 15               | -1.630578               | -1.218536 | -0.692518 |
| 19               | 6                | -0.667056               | -2.012489 | -2.097760 |

|    |    |           |           |           |
|----|----|-----------|-----------|-----------|
| 20 | 1  | -1.171475 | -2.920265 | -2.443017 |
| 21 | 1  | -0.719593 | -1.298814 | -2.923218 |
| 22 | 6  | 0.807118  | -2.331541 | -1.782741 |
| 23 | 1  | 1.341314  | -2.551411 | -2.712056 |
| 24 | 1  | 0.863506  | -3.238034 | -1.175277 |
| 25 | 15 | 1.717708  | -1.010086 | -0.804318 |
| 26 | 1  | 0.701011  | 2.489787  | 0.315632  |
| 27 | 6  | -2.875675 | -0.208328 | -1.681947 |
| 28 | 6  | -3.886703 | -1.030698 | -2.500789 |
| 29 | 6  | -3.583776 | 0.883805  | -0.855875 |
| 30 | 1  | -2.216138 | 0.313275  | -2.389815 |
| 31 | 6  | -4.755647 | -0.127049 | -3.390583 |
| 32 | 1  | -4.538130 | -1.591048 | -1.820727 |
| 33 | 1  | -3.371101 | -1.770553 | -3.121408 |
| 34 | 6  | -4.449655 | 1.781919  | -1.753598 |
| 35 | 1  | -4.218917 | 0.426967  | -0.089770 |
| 36 | 1  | -2.843977 | 1.485450  | -0.320228 |
| 37 | 6  | -5.455898 | 0.967249  | -2.575948 |
| 38 | 1  | -5.493967 | -0.735171 | -3.925534 |
| 39 | 1  | -4.123130 | 0.339097  | -4.157520 |
| 40 | 1  | -4.971753 | 2.523041  | -1.138505 |
| 41 | 1  | -3.799491 | 2.347764  | -2.433965 |
| 42 | 1  | -6.025966 | 1.627088  | -3.239482 |
| 43 | 1  | -6.185790 | 0.502984  | -1.899522 |
| 44 | 6  | -2.559922 | -2.667794 | 0.067423  |
| 45 | 6  | -1.570740 | -3.663133 | 0.708391  |
| 46 | 6  | -3.607012 | -2.208306 | 1.100006  |
| 47 | 1  | -3.079830 | -3.183403 | -0.749897 |
| 48 | 6  | -2.293452 | -4.846269 | 1.370925  |
| 49 | 1  | -0.969239 | -3.139363 | 1.462461  |
| 50 | 1  | -0.871430 | -4.043321 | -0.041737 |
| 51 | 6  | -4.324149 | -3.396550 | 1.759098  |
| 52 | 1  | -3.116258 | -1.605923 | 1.874272  |
| 53 | 1  | -4.347344 | -1.559063 | 0.627216  |
| 54 | 6  | -3.334867 | -4.379364 | 2.393306  |
| 55 | 1  | -1.557564 | -5.503299 | 1.847940  |
| 56 | 1  | -2.788738 | -5.446692 | 0.596325  |
| 57 | 1  | -5.029340 | -3.025588 | 2.511125  |
| 58 | 1  | -4.924192 | -3.922220 | 1.004283  |
| 59 | 1  | -3.867890 | -5.239952 | 2.812479  |
| 60 | 1  | -2.825326 | -3.889617 | 3.233576  |
| 61 | 6  | 2.978397  | -2.082533 | 0.098023  |
| 62 | 6  | 4.022037  | -2.781275 | -0.792744 |
| 63 | 6  | 3.655121  | -1.369450 | 1.284666  |
| 64 | 1  | 2.331734  | -2.860691 | 0.527451  |
| 65 | 6  | 4.890245  | -3.752689 | 0.023902  |

|    |   |          |           |           |
|----|---|----------|-----------|-----------|
| 66 | 1 | 4.670975 | -2.029149 | -1.256514 |
| 67 | 1 | 3.534472 | -3.321328 | -1.610686 |
| 68 | 6 | 4.519533 | -2.344395 | 2.098415  |
| 69 | 1 | 4.288572 | -0.553611 | 0.921066  |
| 70 | 1 | 2.897310 | -0.911053 | 1.926398  |
| 71 | 6 | 5.554359 | -3.057559 | 1.218599  |
| 72 | 1 | 5.650223 | -4.203164 | -0.624548 |
| 73 | 1 | 4.263527 | -4.577986 | 0.386617  |
| 74 | 1 | 5.018524 | -1.805459 | 2.911463  |
| 75 | 1 | 3.870405 | -3.091254 | 2.574545  |
| 76 | 1 | 6.120342 | -3.784637 | 1.811646  |
| 77 | 1 | 6.284220 | -2.323781 | 0.850659  |
| 78 | 6 | 2.650950 | -0.059478 | -2.136242 |
| 79 | 6 | 1.666975 | 0.552569  | -3.154455 |
| 80 | 6 | 3.553320 | 1.034026  | -1.532604 |
| 81 | 1 | 3.283322 | -0.782494 | -2.666483 |
| 82 | 6 | 2.387837 | 1.378894  | -4.230400 |
| 83 | 1 | 0.949172 | 1.194833  | -2.627660 |
| 84 | 1 | 1.084912 | -0.233897 | -3.641996 |
| 85 | 6 | 4.268202 | 1.856590  | -2.615782 |
| 86 | 1 | 2.943000 | 1.703350  | -0.913853 |
| 87 | 1 | 4.295879 | 0.591052  | -0.864918 |
| 88 | 6 | 3.279405 | 2.462923  | -3.616800 |
| 89 | 1 | 1.648039 | 1.826977  | -4.903020 |
| 90 | 1 | 3.002704 | 0.710127  | -4.847034 |
| 91 | 1 | 4.863809 | 2.644607  | -2.141798 |
| 92 | 1 | 4.977633 | 1.212397  | -3.151767 |
| 93 | 1 | 3.817016 | 3.003442  | -4.403683 |
| 94 | 1 | 2.651141 | 3.203512  | -3.104576 |

## Mono- vs. bidentate comparison (dCype):

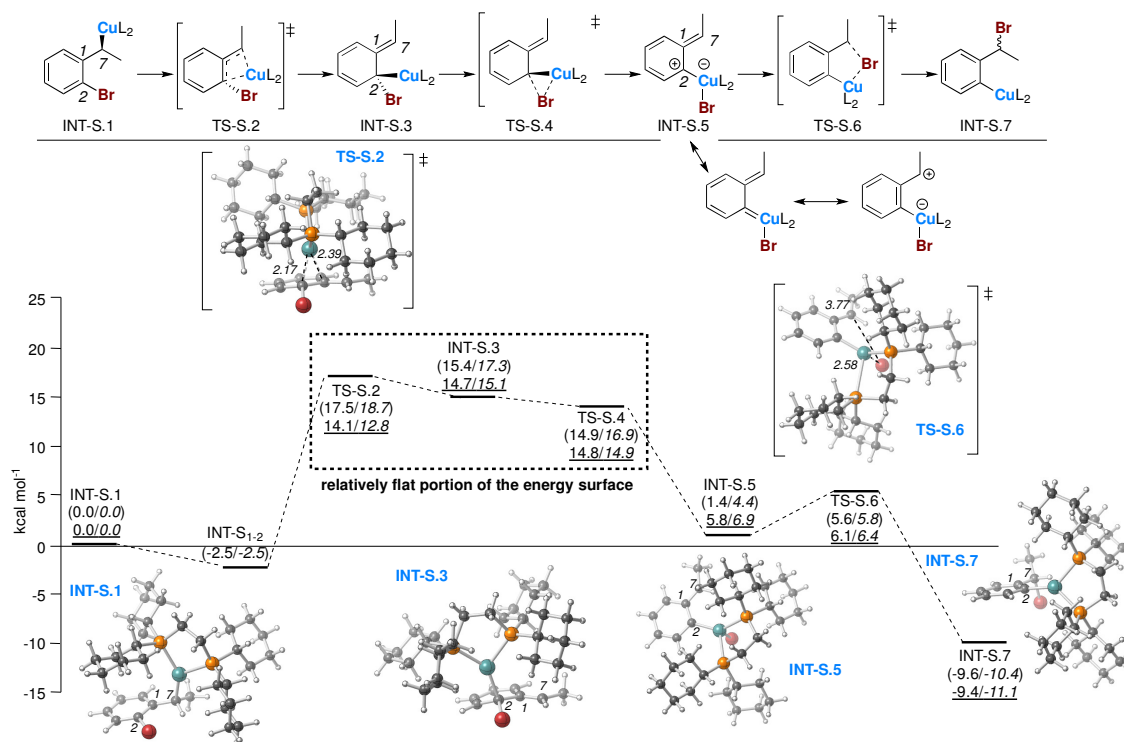

(Free energies/electronic energies) of the monodentate system followed by free energies/electronic energies of the bidentate system relative to INT-S.1 shown in kcal mol<sup>-1</sup> computed using SMD(THF)-B3LYP/6-311G(d):LANL2TZ (Cu). Energy of INT-S.1,2 represents a bidentate system becoming a monodentate system. Structures of the bidentate (dCype) system shown. Select bond distances shown in Ångstroms.

## Comparison of basis sets for monodentate dMepe and dCype ligand systems:

Table S2. Free and electronic energies of stationary points for varied ligand conformations at multiple basis sets.

| Stationary Point | LANL2DZ <sup>S13</sup><br>(ΔG/ΔE)<br>(Methyl) | LANL2DZ<br>(ΔG/ΔE) | LANL2TZ<br>(ΔG/ΔE) | Def2-SVP <sup>S16</sup><br>single point<br>(ΔE) |
|------------------|-----------------------------------------------|--------------------|--------------------|-------------------------------------------------|
| INT-S.1          | 0/0                                           | 0/0                | 0/0                | 0                                               |
| TS-S.2           | 20.9/21.0                                     | 19.4/20.5          | 20.0/21.2          | 19.8                                            |
| INT-S.3          | 17.4/18.5                                     | 20.0/22.0          | 17.9/19.8          | 22.8                                            |
| TS-S.4           | 20.4/20.2                                     | 18.2/20.0          | 17.4/19.4          | 23.6                                            |
| INT-S.5          | 4.1/4.9                                       | 5.5/8.2            | 3.9/6.8            | 10.7                                            |
| TS-S.6           | 6.9/7.8                                       | 8.6/9.0            | 8.1/8.2            | 11.8                                            |
| INT-S.7          | -6.2/-7.4                                     | -6.4/-7.1          | -7.1/-7.9          | -5.4                                            |

\*Free energies (ΔG) and electronic energies (ΔE) in kcal/mol using the B3LYP functional. Single point energies were computed from B3LYP/def2-SVP//B3LYP/6-311G(d):LANL2TZ+(Cu).

Table S3. Free and electronic energies of stationary points from conformations shown in the figure above at multiple basis sets.

| Stationary Point | LANL2DZ ( $\Delta G/\Delta E$ ) | LANL2TZ+ ( $\Delta G/\Delta E$ ) |
|------------------|---------------------------------|----------------------------------|
| <i>INT-S.1</i>   | 0/0                             | 0/0                              |
| <i>TS-S.2</i>    | 18.9/20.9                       | 22.5/21.2                        |
| <i>INT-S.3</i>   | 15.5/18.7                       | 18.6/18.5                        |
| <i>TS-S.4</i>    | 17.5/20.7                       | 20.1/20.1                        |
| <i>INT-S.5</i>   | -1.9/2.5                        | 4.3/5.6                          |
| <i>TS-S.6</i>    | 6.3/8.3                         | 8.9/7.0                          |
| <i>INT-S.7</i>   | -13.7/-12.0                     | -7.4/-8.6                        |

\*Free energies ( $\Delta G$ ) and *electronic energies* ( $\Delta E$ ) in kcal/mol using the B3LYP functional.

### **Comparison of functionals for monodentate dCype ligand system:**

Table S4. Electronic energies of stationary points for varied ligand conformations/conformations shown in the figure above at multiple functionals.

| Stationary point | B3LYP            | B3LYP-D3 <sup>S18</sup> | M06-2X <sup>S19</sup> | $\omega$ B97xD <sup>S20</sup> |
|------------------|------------------|-------------------------|-----------------------|-------------------------------|
| <i>INT-S.1</i>   | <u>0.0/0.0</u>   | <u>0.0/0.0</u>          | <u>0.0/0.0</u>        | <u>0.0/0.0</u>                |
| <i>TS-S.2</i>    | <u>21.2/21.5</u> | <u>20.0/22.8</u>        | <u>14.1/16.4</u>      | <u>19.3/21.4</u>              |
| <i>INT-S.3</i>   | <u>19.8/19.0</u> | <u>19.3/21.6</u>        | <u>17.7/19.1</u>      | <u>19.9/21.5</u>              |
| <i>TS-S.4</i>    | <u>19.4/20.7</u> | <u>19.8/23.9</u>        | <u>22.1/25.3</u>      | <u>22.4/26.1</u>              |
| <i>INT-S.5</i>   | <u>6.8/6.1</u>   | <u>6.7/8.8</u>          | <u>12.8/14.0</u>      | <u>10.6/12.0</u>              |
| <i>TS-S.6</i>    | <u>8.2/7.5</u>   | <u>7.5/9.7</u>          | <u>13.2/14.3</u>      | <u>12.4/13.8</u>              |
| <i>INT-S.7</i>   | <u>-7.9/-8.0</u> | <u>-7.7/-4.4</u>        | <u>-5.4/-3.2</u>      | <u>-7.1/-4.7</u>              |

\*Single point *electronic energies* ( $\Delta E$ ) in kcal/mol using the 6-311G(d):LANL2TZ(Cu) split basis set.

### **Stereoablative step:**

A transition state optimization of the first maxima (TS1) from the dihedral angle scan (below) allows us to compare the barrier for rotation about the C-Cu bond (scrambling) to the barrier for the 1,4-shift (stereochemical-determining step) (Energies shown below in Table S.5). The rotational barrier is comparable to the barrier for the 1,4-shift; therefore, the stereochemical scrambling is a result of the reversibility of  $INT-4.5 \leftrightarrow INT4.7$  reaction.

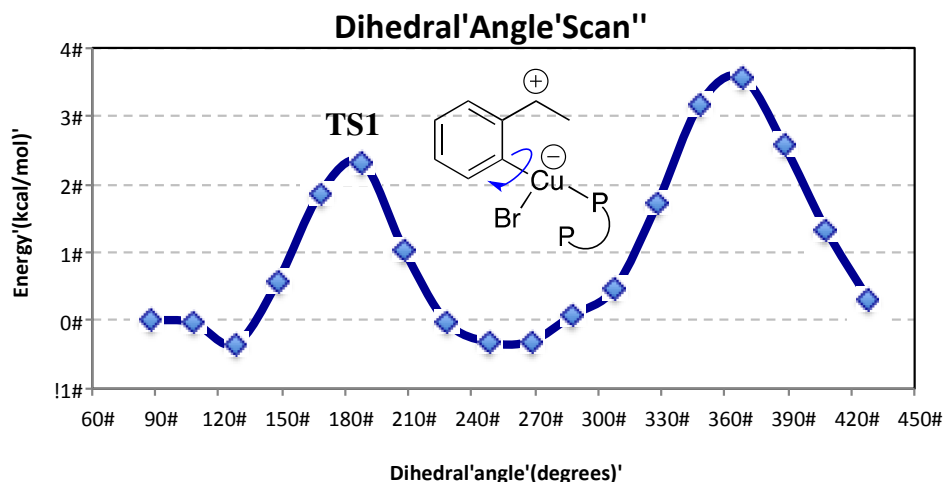

Dihedral angle scan (done in 10° increments) that rotates about the C-Cu bond (highlighted) using SMD(THF)-B3LYP/6-311G(d):LANL2TZ(Cu) for the monodentate dCype ligand system.

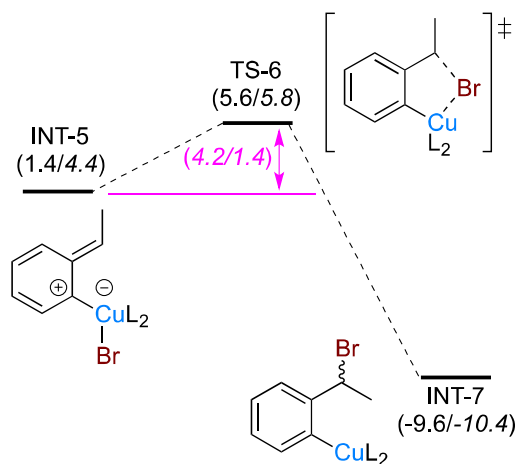

(Free energies/electronic energies) computed using SMD(THF)-B3LYP/6-311G(d):LANL2TZ (Cu) of the monodentate dCype ligand in kcal mol<sup>-1</sup> relative to INT-1.

Table S.5 Comparing C-Cu rotational barrier to the 1,4-Br shift to investigate stereochemical scrambling.

| <b>TS1 energy relative to:</b>    | <b>ΔG</b> | <b>ΔHF</b> | <b>ΔZPE</b> |
|-----------------------------------|-----------|------------|-------------|
| INT-S.1                           | 6.1       | 6.7        | 6.3         |
| INT-S.5                           | 4.6       | 2.4        | 2.6         |
| <b>TS-S.6 energy relative to:</b> | <b>ΔG</b> | <b>ΔHF</b> | <b>ΔZPE</b> |
| INT-S.1                           | 5.6       | 5.8        | 5.8         |
| INT-S.5                           | 4.2       | 1.4        | 2.0         |

\* G= Free Energy; HF= Electronic Energy, ZPE= Electronic Energy+zero-point correction. All energies shown in kcal/mol.

**Calculated coordinates and energies (dCype, monodentate) of stationary points from dihedral angle scan:**

B3LYP/6-311G(d):LANL2TZ(Cu)

**TS1 from dihedral angle scan of INT-4.5**

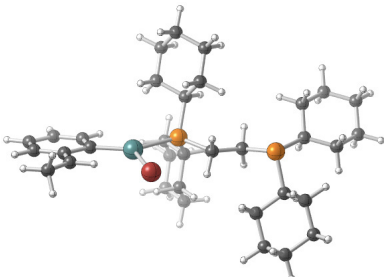

Charge = 0 Multiplicity = 1

Link 0: opt=(calcfc,ts,noeigen) freq=noraman b3lyp/gen scrf=(solvent=thf,smd) pseudo=read

HF=-4782.7923667 hartrees (-3001266.50106652 kcal/mol)

Imaginary Frequencies: 1 (-27.59 1/cm)

Zero-point correction= 0.835996 (Hartree/Particle)

Temperature 298.150 Kelvin. Pressure 1.00000 Atm.

Sum of electronic and thermal Free Energies=  
-4782.036196 hartrees (-3000775.53335 kcal/mol)

Coordinates (from last standard orientation):

| Center Number | Atomic Number | Coordinates (Angstroms) |           |           |
|---------------|---------------|-------------------------|-----------|-----------|
|               |               | X                       | Y         | Z         |
| 1             | 6             | 7.013980                | -0.382598 | -0.928314 |
| 2             | 6             | 5.604727                | -0.652368 | -1.078179 |
| 3             | 6             | 4.625055                | -0.191704 | -0.099386 |
| 4             | 6             | 5.182049                | 0.524523  | 0.987414  |
| 5             | 6             | 6.540964                | 0.753663  | 1.128838  |
| 6             | 6             | 7.471473                | 0.301895  | 0.161382  |
| 7             | 1             | 4.522536                | 0.914383  | 1.757159  |
| 8             | 1             | 6.907850                | 1.296581  | 1.996147  |
| 9             | 1             | 8.529167                | 0.504782  | 0.289176  |
| 10            | 6             | 5.130851                | -1.363526 | -2.167814 |
| 11            | 6             | 5.867131                | -1.907165 | -3.322451 |
| 12            | 1             | 5.461076                | -1.451882 | -4.237043 |
| 13            | 1             | 6.946020                | -1.771333 | -3.305443 |
| 14            | 1             | 5.633267                | -2.974613 | -3.423296 |
| 15            | 1             | 7.717278                | -0.723182 | -1.679381 |
| 16            | 35            | 1.915250                | -2.930884 | -0.594449 |

|    |    |           |           |           |
|----|----|-----------|-----------|-----------|
| 17 | 29 | 2.684149  | -0.515410 | -0.151217 |
| 18 | 15 | 0.709901  | 0.662904  | 0.325193  |
| 19 | 6  | -0.826477 | -0.250178 | -0.218041 |
| 20 | 1  | -0.748839 | -0.305343 | -1.306521 |
| 21 | 1  | -0.686986 | -1.278283 | 0.112654  |
| 22 | 6  | -2.195619 | 0.303668  | 0.206179  |
| 23 | 1  | -2.209371 | 1.392604  | 0.115808  |
| 24 | 1  | -2.400582 | 0.082037  | 1.257863  |
| 25 | 15 | -3.629440 | -0.271450 | -0.873541 |
| 26 | 1  | 4.062422  | -1.570991 | -2.163945 |
| 27 | 6  | 0.390912  | 0.944136  | 2.158474  |
| 28 | 6  | 0.441169  | -0.404145 | 2.907078  |
| 29 | 6  | 1.338459  | 1.964773  | 2.816327  |
| 30 | 1  | -0.630156 | 1.338760  | 2.232784  |
| 31 | 6  | 0.153275  | -0.240551 | 4.406161  |
| 32 | 1  | 1.434025  | -0.852673 | 2.777212  |
| 33 | 1  | -0.272177 | -1.110264 | 2.472590  |
| 34 | 6  | 1.058340  | 2.114930  | 4.320912  |
| 35 | 1  | 2.378840  | 1.648018  | 2.670332  |
| 36 | 1  | 1.237807  | 2.943857  | 2.339760  |
| 37 | 6  | 1.103171  | 0.771045  | 5.055307  |
| 38 | 1  | 0.232955  | -1.213811 | 4.902885  |
| 39 | 1  | -0.884097 | 0.093068  | 4.543009  |
| 40 | 1  | 1.780430  | 2.813387  | 4.758390  |
| 41 | 1  | 0.068162  | 2.569768  | 4.458119  |
| 42 | 1  | 0.854038  | 0.906870  | 6.113449  |
| 43 | 1  | 2.126797  | 0.374530  | 5.025608  |
| 44 | 6  | 0.555660  | 2.372378  | -0.465262 |
| 45 | 6  | 1.928572  | 3.077982  | -0.508706 |
| 46 | 6  | -0.035174 | 2.312376  | -1.887681 |
| 47 | 1  | -0.122511 | 2.959957  | 0.167237  |
| 48 | 6  | 1.835968  | 4.477539  | -1.134648 |
| 49 | 1  | 2.619229  | 2.462320  | -1.097744 |
| 50 | 1  | 2.363934  | 3.144264  | 0.490792  |
| 51 | 6  | -0.131117 | 3.708238  | -2.521418 |
| 52 | 1  | 0.596684  | 1.672810  | -2.518463 |
| 53 | 1  | -1.026214 | 1.856124  | -1.879181 |
| 54 | 6  | 1.221853  | 4.426729  | -2.537905 |
| 55 | 1  | 2.833229  | 4.929902  | -1.170174 |
| 56 | 1  | 1.224898  | 5.125035  | -0.491776 |
| 57 | 1  | -0.530968 | 3.622359  | -3.537781 |
| 58 | 1  | -0.854473 | 4.309274  | -1.954709 |
| 59 | 1  | 1.111994  | 5.438178  | -2.944468 |
| 60 | 1  | 1.905512  | 3.892976  | -3.211225 |
| 61 | 6  | -4.928031 | 0.975386  | -0.272052 |
| 62 | 6  | -4.682495 | 2.350470  | -0.929254 |



|    |   |           |           |           |
|----|---|-----------|-----------|-----------|
| 63 | 6 | -6.380237 | 0.532376  | -0.531548 |
| 64 | 1 | -4.792021 | 1.078441  | 0.814037  |
| 65 | 6 | -5.691762 | 3.409898  | -0.460390 |
| 66 | 1 | -4.754940 | 2.241721  | -2.019144 |
| 67 | 1 | -3.667646 | 2.704812  | -0.724208 |
| 68 | 6 | -7.393443 | 1.587921  | -0.059166 |
| 69 | 1 | -6.521594 | 0.357116  | -1.606271 |
| 70 | 1 | -6.592363 | -0.414229 | -0.028391 |
| 71 | 6 | -7.136792 | 2.957015  | -0.696742 |
| 72 | 1 | -5.499198 | 4.356549  | -0.977943 |
| 73 | 1 | -5.541470 | 3.605201  | 0.609738  |
| 74 | 1 | -8.410308 | 1.247606  | -0.285348 |
| 75 | 1 | -7.334830 | 1.679890  | 1.033503  |
| 76 | 1 | -7.839610 | 3.699456  | -0.302149 |
| 77 | 1 | -7.324269 | 2.895623  | -1.777054 |
| 78 | 6 | -4.202681 | -1.888619 | -0.067157 |
| 79 | 6 | -5.069132 | -2.676875 | -1.074337 |
| 80 | 6 | -3.046689 | -2.778019 | 0.426935  |
| 81 | 1 | -4.816603 | -1.625940 | 0.804680  |
| 82 | 6 | -5.586985 | -4.000148 | -0.491709 |
| 83 | 1 | -4.460181 | -2.887847 | -1.962865 |
| 84 | 1 | -5.911323 | -2.072351 | -1.421923 |
| 85 | 6 | -3.559275 | -4.103843 | 1.013386  |
| 86 | 1 | -2.364384 | -2.995157 | -0.404545 |
| 87 | 1 | -2.457375 | -2.256157 | 1.185012  |
| 88 | 6 | -4.436721 | -4.873284 | 0.020328  |
| 89 | 1 | -6.165714 | -4.536949 | -1.252159 |
| 90 | 1 | -6.281123 | -3.788559 | 0.332935  |
| 91 | 1 | -2.707172 | -4.719268 | 1.322291  |
| 92 | 1 | -4.138787 | -3.896958 | 1.923292  |
| 93 | 1 | -4.825608 | -5.786361 | 0.484679  |
| 94 | 1 | -3.822136 | -5.193633 | -0.831139 |

**Figure 4 showing free energies and electronic energies:**

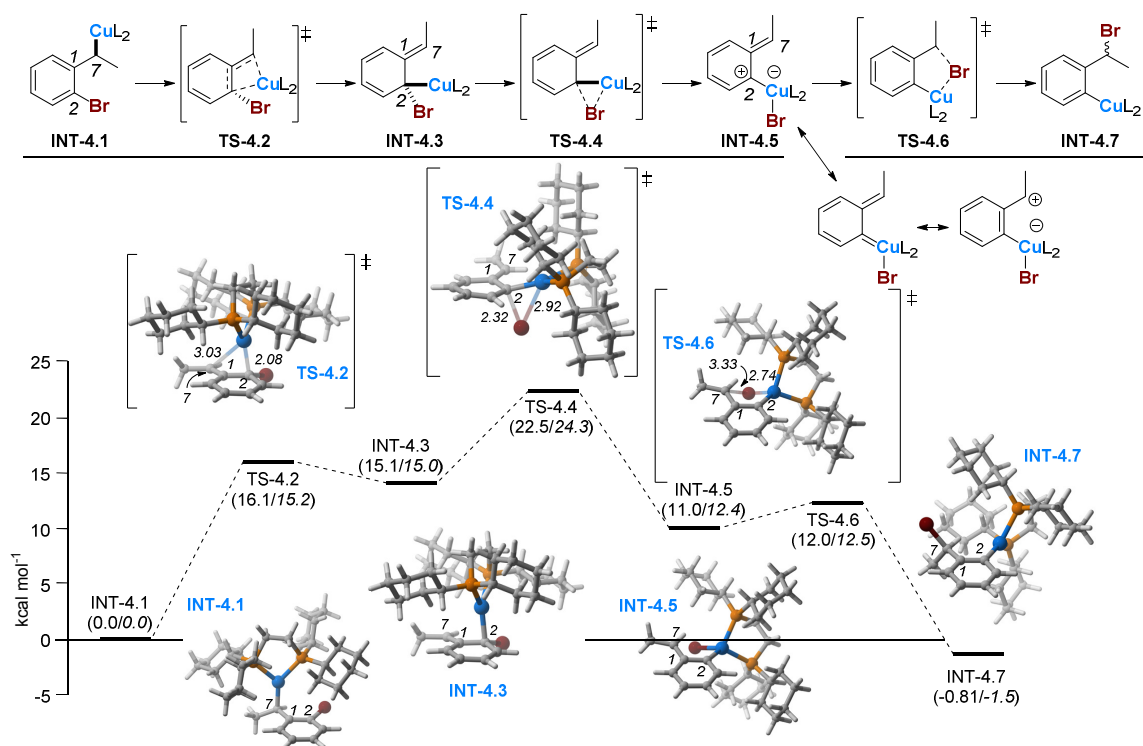

(Free energies shown/electronic energies) are in kcal mol<sup>-1</sup> relative to INT-4.1 computed at SMD(THF)-M06/6-311G(d):LANL2TZ+ (Cu). Select bond lengths shown in Angstroms.

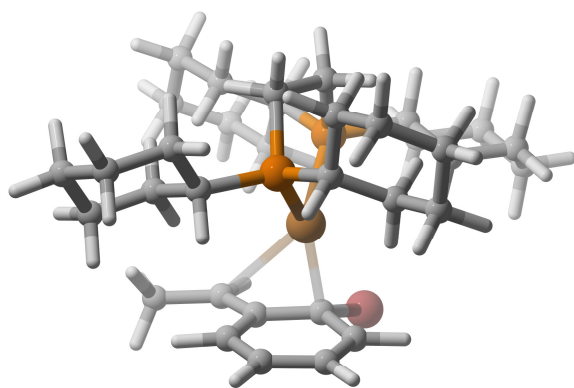

$\kappa$ -2 dearomative transition state (entry 23)

RM06 energy: -4781.5858654

Sum of electronic and thermal Free Energies: -4780.824178

Imaginary frequency: -27.3185

|    |           |           |           |
|----|-----------|-----------|-----------|
| 6  | -1.404219 | 0.044602  | -2.261837 |
| 6  | 0.002918  | 0.566270  | -2.555456 |
| 15 | 1.311390  | 0.022707  | -1.341173 |
| 6  | 2.019314  | -1.531472 | -2.088768 |
| 1  | 2.612183  | -1.230925 | -2.971585 |
| 6  | 0.910129  | -2.479393 | -2.545917 |
| 6  | 1.468100  | -3.784060 | -3.098877 |
| 6  | 2.372353  | -4.476588 | -2.092807 |
| 6  | 3.484076  | -3.544016 | -1.644310 |
| 6  | 2.919817  | -2.248661 | -1.079811 |
| 1  | 3.733849  | -1.599685 | -0.740709 |
| 1  | 2.321711  | -2.471096 | -0.181046 |
| 1  | 4.139832  | -3.316697 | -2.500794 |
| 1  | 4.117690  | -4.031350 | -0.891709 |
| 1  | 2.786133  | -5.400839 | -2.517390 |
| 1  | 1.776386  | -4.775678 | -1.214790 |
| 1  | 2.040612  | -3.570831 | -4.016295 |
| 1  | 0.641573  | -4.442627 | -3.397290 |
| 1  | 0.255466  | -2.702014 | -1.684771 |
| 1  | 0.280813  | -2.002894 | -3.307758 |
| 6  | 2.576983  | 1.361375  | -1.632482 |
| 1  | 2.547747  | 1.590886  | -2.713386 |
| 6  | 2.152651  | 2.605188  | -0.848234 |
| 6  | 3.127210  | 3.758606  | -1.037624 |
| 6  | 4.540552  | 3.347515  | -0.659193 |
| 6  | 4.972572  | 2.126449  | -1.454483 |
| 6  | 4.005099  | 0.964581  | -1.266383 |
| 1  | 4.334688  | 0.113621  | -1.875689 |
| 1  | 4.033965  | 0.634497  | -0.214990 |
| 1  | 5.020692  | 2.388597  | -2.523850 |
| 1  | 5.985400  | 1.814340  | -1.167279 |
| 1  | 5.241229  | 4.178028  | -0.816081 |
| 1  | 4.573222  | 3.110558  | 0.416805  |
| 1  | 3.111182  | 4.082810  | -2.090830 |
| 1  | 2.802316  | 4.622579  | -0.443018 |
| 1  | 1.140753  | 2.919264  | -1.135962 |
| 1  | 2.099078  | 2.342915  | 0.221823  |
| 29 | 0.087770  | 0.046017  | 0.614949  |
| 15 | -1.914332 | 0.339679  | -0.502328 |
| 6  | -3.232708 | -0.912021 | -0.156043 |

|    |           |           |           |
|----|-----------|-----------|-----------|
| 6  | -4.481453 | -0.896515 | -1.030913 |
| 6  | -5.482247 | -1.948143 | -0.562679 |
| 6  | -4.862202 | -3.336246 | -0.505485 |
| 6  | -3.612440 | -3.344284 | 0.362086  |
| 6  | -2.610052 | -2.307136 | -0.120544 |
| 1  | -2.268272 | -2.585802 | -1.131061 |
| 1  | -1.716878 | -2.299466 | 0.519054  |
| 1  | -3.885265 | -3.121976 | 1.406885  |
| 1  | -3.151467 | -4.341027 | 0.367143  |
| 1  | -4.594247 | -3.655821 | -1.525811 |
| 1  | -5.593714 | -4.066635 | -0.135567 |
| 1  | -5.843024 | -1.671996 | 0.441097  |
| 1  | -6.363289 | -1.946008 | -1.218044 |
| 1  | -4.956279 | 0.092406  | -1.013412 |
| 1  | -4.202161 | -1.095994 | -2.078622 |
| 1  | -3.530676 | -0.660084 | 0.878039  |
| 6  | -2.761556 | 1.995594  | -0.440313 |
| 6  | -3.440979 | 2.463671  | -1.725742 |
| 6  | -4.160066 | 3.790015  | -1.510761 |
| 6  | -3.207299 | 4.859322  | -0.998468 |
| 6  | -2.498770 | 4.400732  | 0.267088  |
| 6  | -1.792303 | 3.069929  | 0.056091  |
| 1  | -1.300436 | 2.740063  | 0.981355  |
| 1  | -0.991775 | 3.199447  | -0.691691 |
| 1  | -1.780952 | 5.159720  | 0.604875  |
| 1  | -3.236504 | 4.289217  | 1.078116  |
| 1  | -2.456138 | 5.074871  | -1.775815 |
| 1  | -3.744965 | 5.799805  | -0.819975 |
| 1  | -4.635690 | 4.114162  | -2.445854 |
| 1  | -4.973658 | 3.646423  | -0.781753 |
| 1  | -2.677439 | 2.599259  | -2.508922 |
| 1  | -4.141192 | 1.710181  | -2.106802 |
| 1  | -3.533672 | 1.854504  | 0.338462  |
| 6  | 0.805220  | -2.398866 | 2.256906  |
| 6  | 0.176822  | -3.755342 | 2.300356  |
| 1  | -0.076714 | -4.096433 | 3.319291  |
| 1  | -0.759404 | -3.832340 | 1.722729  |
| 1  | 0.856185  | -4.509051 | 1.884036  |
| 6  | 0.170933  | -1.243033 | 2.636334  |
| 6  | -1.208107 | -1.237863 | 3.111461  |
| 6  | -1.833677 | -0.122892 | 3.580731  |
| 6  | -1.197075 | 1.144229  | 3.593260  |
| 6  | 0.092548  | 1.221670  | 3.123475  |
| 6  | 0.764732  | 0.099751  | 2.583953  |
| 35 | 2.709826  | 0.234919  | 2.576616  |
| 1  | 0.626224  | 2.172252  | 3.146884  |

|   |           |           |           |
|---|-----------|-----------|-----------|
| 1 | -1.713942 | 2.032465  | 3.948240  |
| 1 | -2.850172 | -0.213093 | 3.965254  |
| 1 | -1.717569 | -2.199231 | 3.177021  |
| 1 | 1.861425  | -2.342509 | 2.003363  |
| 1 | 0.314300  | 0.295553  | -3.574560 |
| 1 | 0.002534  | 1.664661  | -2.522680 |
| 1 | -1.444334 | -1.042177 | -2.403775 |
| 1 | -2.123734 | 0.470918  | -2.971123 |

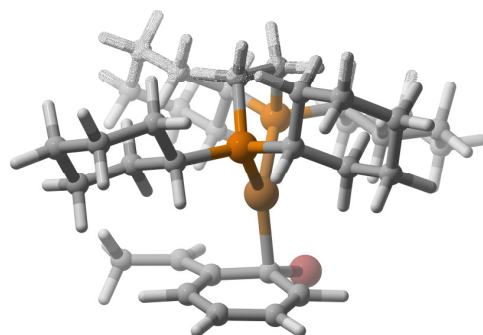

$\kappa$ -2 dearomatized intermediate (entry 26)

RM06 energy: -4781.586216

Sum of electronic and thermal Free Energies: -4780.825867

|    |           |           |           |
|----|-----------|-----------|-----------|
| 6  | -0.925679 | 0.077780  | -2.660864 |
| 6  | 0.479971  | 0.669243  | -2.654197 |
| 15 | 1.536173  | 0.156555  | -1.205250 |
| 6  | 2.515428  | -1.282110 | -1.868196 |
| 1  | 3.220509  | -0.876543 | -2.616526 |
| 6  | 1.599886  | -2.294770 | -2.557734 |
| 6  | 2.376494  | -3.499504 | -3.072561 |
| 6  | 3.161141  | -4.175019 | -1.960375 |
| 6  | 4.076790  | -3.177958 | -1.270709 |
| 6  | 3.292272  | -1.981458 | -0.751165 |
| 1  | 3.963785  | -1.287529 | -0.235075 |
| 1  | 2.569270  | -2.322984 | 0.006907  |
| 1  | 4.844167  | -2.831178 | -1.982214 |
| 1  | 4.616095  | -3.656221 | -0.442570 |
| 1  | 3.735565  | -5.023501 | -2.354459 |
| 1  | 2.457984  | -4.591175 | -1.219945 |
| 1  | 3.073318  | -3.169309 | -3.860109 |
| 1  | 1.686657  | -4.209416 | -3.547848 |
| 1  | 0.842414  | -2.637994 | -1.830937 |

|    |           |           |           |
|----|-----------|-----------|-----------|
| 1  | 1.055110  | -1.828917 | -3.388307 |
| 6  | 2.696113  | 1.617477  | -1.182891 |
| 1  | 2.834266  | 1.916134  | -2.238206 |
| 6  | 2.010172  | 2.758569  | -0.427860 |
| 6  | 2.867072  | 4.015283  | -0.396901 |
| 6  | 4.235625  | 3.725676  | 0.199172  |
| 6  | 4.925438  | 2.602993  | -0.558728 |
| 6  | 4.073784  | 1.340038  | -0.588123 |
| 1  | 4.591289  | 0.561047  | -1.162461 |
| 1  | 3.957353  | 0.956097  | 0.437752  |
| 1  | 5.123555  | 2.930732  | -1.592234 |
| 1  | 5.903654  | 2.379754  | -0.113007 |
| 1  | 4.857556  | 4.630435  | 0.198307  |
| 1  | 4.115505  | 3.431577  | 1.254894  |
| 1  | 2.989520  | 4.401046  | -1.421989 |
| 1  | 2.355138  | 4.803108  | 0.171268  |
| 1  | 1.028180  | 2.984086  | -0.866888 |
| 1  | 1.813491  | 2.424339  | 0.604118  |
| 29 | -0.083530 | 0.070885  | 0.483584  |
| 15 | -1.814938 | 0.257631  | -1.039789 |
| 6  | -3.037748 | -1.137191 | -1.183687 |
| 6  | -2.318860 | -2.451830 | -0.879089 |
| 6  | -3.248384 | -3.651676 | -0.979414 |
| 6  | -4.454598 | -3.482406 | -0.069120 |
| 6  | -5.182280 | -2.184464 | -0.379747 |
| 6  | -4.253858 | -0.981366 | -0.273660 |
| 1  | -3.912443 | -0.878550 | 0.769390  |
| 1  | -4.808043 | -0.065635 | -0.517673 |
| 1  | -5.595650 | -2.235643 | -1.400209 |
| 1  | -6.038926 | -2.050595 | 0.293872  |
| 1  | -4.115805 | -3.467754 | 0.980096  |
| 1  | -5.135875 | -4.338010 | -0.163404 |
| 1  | -3.589517 | -3.767549 | -2.020926 |
| 1  | -2.698159 | -4.568913 | -0.729292 |
| 1  | -1.452998 | -2.591112 | -1.540765 |
| 1  | -1.916598 | -2.390679 | 0.144361  |
| 1  | -3.382774 | -1.143344 | -2.233938 |
| 6  | -2.830394 | 1.807947  | -1.213718 |
| 6  | -2.085288 | 2.934547  | -1.927407 |
| 6  | -2.952633 | 4.182093  | -2.040515 |
| 6  | -3.442700 | 4.652794  | -0.680228 |
| 6  | -4.166038 | 3.534017  | 0.052304  |
| 6  | -3.289001 | 2.295313  | 0.162940  |
| 1  | -3.813352 | 1.504405  | 0.713614  |
| 1  | -2.394111 | 2.532753  | 0.762756  |
| 1  | -4.476038 | 3.863856  | 1.052572  |

|    |           |           |           |
|----|-----------|-----------|-----------|
| 1  | -5.090612 | 3.277703  | -0.490271 |
| 1  | -2.580344 | 4.979307  | -0.077013 |
| 1  | -4.093997 | 5.529744  | -0.789503 |
| 1  | -2.393768 | 4.979836  | -2.547482 |
| 1  | -3.820454 | 3.957165  | -2.681403 |
| 1  | -1.172777 | 3.179075  | -1.357800 |
| 1  | -1.758718 | 2.622328  | -2.927319 |
| 1  | -3.714672 | 1.541790  | -1.820141 |
| 6  | 0.552974  | -2.516304 | 2.147305  |
| 6  | 0.004379  | -3.903920 | 2.046113  |
| 1  | -0.313834 | -4.331487 | 3.012926  |
| 1  | -0.875116 | -3.983983 | 1.385183  |
| 1  | 0.757208  | -4.590939 | 1.640194  |
| 6  | -0.192203 | -1.416593 | 2.480069  |
| 6  | -1.612954 | -1.515259 | 2.792494  |
| 6  | -2.363384 | -0.461066 | 3.214983  |
| 6  | -1.823072 | 0.845562  | 3.334048  |
| 6  | -0.500811 | 1.023662  | 3.016190  |
| 6  | 0.308744  | -0.032995 | 2.522277  |
| 35 | 2.219565  | 0.219723  | 2.843550  |
| 1  | -0.038827 | 2.004795  | 3.128277  |
| 1  | -2.441198 | 1.684898  | 3.642900  |
| 1  | -3.407866 | -0.632102 | 3.478331  |
| 1  | -2.061328 | -2.508550 | 2.783184  |
| 1  | 1.625163  | -2.388305 | 2.014624  |
| 1  | 1.010287  | 0.437083  | -3.588827 |
| 1  | 0.421922  | 1.763635  | -2.606356 |
| 1  | -0.883661 | -0.999892 | -2.859317 |
| 1  | -1.530847 | 0.509738  | -3.469783 |

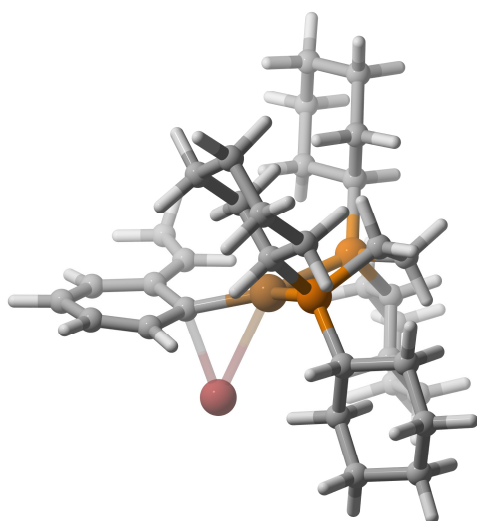

$\kappa$ -2 1,2-bromide shift (entry 29)

RM06 energy: -4781.5714587

Sum of electronic and thermal Free Energies: -4780.814047

Imaginary frequency: -109.1455

|    |           |           |           |
|----|-----------|-----------|-----------|
| 6  | -1.625992 | -0.048725 | -2.258448 |
| 6  | -0.369941 | 0.737045  | -2.624848 |
| 15 | 1.099244  | 0.319580  | -1.559633 |
| 6  | 2.001693  | -0.992863 | -2.537869 |
| 1  | 2.522421  | -0.475216 | -3.363995 |
| 6  | 1.040097  | -2.017826 | -3.138706 |
| 6  | 1.782175  | -3.088864 | -3.927328 |
| 6  | 2.832686  | -3.787890 | -3.079819 |
| 6  | 3.786455  | -2.778316 | -2.463377 |
| 6  | 3.028555  | -1.724464 | -1.668240 |
| 1  | 3.732935  | -1.024879 | -1.202202 |
| 1  | 2.494741  | -2.214144 | -0.836204 |
| 1  | 4.366829  | -2.285831 | -3.260428 |
| 1  | 4.516062  | -3.281600 | -1.815059 |
| 1  | 3.381999  | -4.525767 | -3.679078 |
| 1  | 2.333752  | -4.350136 | -2.274140 |
| 1  | 2.269543  | -2.618730 | -4.797163 |
| 1  | 1.065040  | -3.815650 | -4.331713 |
| 1  | 0.470330  | -2.494909 | -2.322080 |
| 1  | 0.306636  | -1.532459 | -3.792889 |
| 6  | 2.111929  | 1.867022  | -1.776020 |



|    |           |           |           |
|----|-----------|-----------|-----------|
| 1  | 2.079117  | 2.124353  | -2.850687 |
| 6  | 1.477602  | 3.000307  | -0.966768 |
| 6  | 2.277955  | 4.290962  | -1.068312 |
| 6  | 3.718528  | 4.076481  | -0.634286 |
| 6  | 4.362837  | 2.970773  | -1.453339 |
| 6  | 3.569683  | 1.673700  | -1.362422 |
| 1  | 4.047550  | 0.908140  | -1.986152 |
| 1  | 3.602666  | 1.302018  | -0.323614 |
| 1  | 4.420357  | 3.286116  | -2.507844 |
| 1  | 5.396342  | 2.796096  | -1.126617 |
| 1  | 4.292337  | 5.008264  | -0.724079 |
| 1  | 3.737769  | 3.798681  | 0.432268  |
| 1  | 2.261278  | 4.654756  | -2.108679 |
| 1  | 1.801957  | 5.071050  | -0.459805 |
| 1  | 0.442474  | 3.179865  | -1.286884 |
| 1  | 1.419536  | 2.690206  | 0.089565  |
| 29 | 0.162389  | -0.151114 | 0.505675  |
| 15 | -1.992325 | 0.040826  | -0.438895 |
| 6  | -3.084867 | -1.425581 | -0.132490 |
| 6  | -4.335968 | -1.542003 | -0.998736 |
| 6  | -5.165815 | -2.756142 | -0.597104 |
| 6  | -4.344492 | -4.035892 | -0.640474 |
| 6  | -3.094910 | -3.917250 | 0.220245  |
| 6  | -2.260777 | -2.712031 | -0.187188 |
| 1  | -1.887657 | -2.867572 | -1.213346 |
| 1  | -1.371676 | -2.618137 | 0.452801  |
| 1  | -3.385810 | -3.812187 | 1.277912  |
| 1  | -2.492927 | -4.833050 | 0.155204  |
| 1  | -4.047030 | -4.239833 | -1.682258 |
| 1  | -4.952744 | -4.892360 | -0.320695 |
| 1  | -5.549081 | -2.605634 | 0.424977  |
| 1  | -6.046576 | -2.841037 | -1.247458 |
| 1  | -4.947171 | -0.632510 | -0.923190 |
| 1  | -4.041323 | -1.636534 | -2.056560 |
| 1  | -3.405313 | -1.282333 | 0.915440  |
| 6  | -3.113162 | 1.512997  | -0.179634 |
| 6  | -3.777023 | 2.079552  | -1.431586 |
| 6  | -4.688716 | 3.251411  | -1.089000 |
| 6  | -3.932886 | 4.342810  | -0.346492 |
| 6  | -3.264669 | 3.787834  | 0.901988  |
| 6  | -2.358610 | 2.611586  | 0.570521  |
| 1  | -1.896513 | 2.204537  | 1.480154  |
| 1  | -1.518320 | 2.959589  | -0.053954 |
| 1  | -2.692303 | 4.570888  | 1.416501  |
| 1  | -4.040078 | 3.455523  | 1.611124  |
| 1  | -3.162275 | 4.764501  | -1.012322 |

|    |           |           |           |
|----|-----------|-----------|-----------|
| 1  | -4.606118 | 5.171282  | -0.089463 |
| 1  | -5.143777 | 3.651437  | -2.005113 |
| 1  | -5.519821 | 2.891710  | -0.461327 |
| 1  | -2.998387 | 2.428815  | -2.129356 |
| 1  | -4.342996 | 1.303939  | -1.963769 |
| 1  | -3.904708 | 1.132344  | 0.490352  |
| 6  | 2.927287  | -1.349677 | 1.904419  |
| 6  | 4.299012  | -1.875798 | 2.087534  |
| 1  | 4.448718  | -2.426106 | 3.020649  |
| 1  | 4.571529  | -2.545808 | 1.258565  |
| 1  | 5.034666  | -1.059074 | 2.059832  |
| 6  | 1.859836  | -1.442994 | 2.733128  |
| 6  | 1.908891  | -2.184243 | 3.981150  |
| 6  | 0.780940  | -2.465831 | 4.664857  |
| 6  | -0.489729 | -1.962087 | 4.220433  |
| 6  | -0.553891 | -1.098046 | 3.180212  |
| 6  | 0.585978  | -0.790409 | 2.342007  |
| 35 | 0.838840  | 1.455730  | 2.853577  |
| 1  | -1.506554 | -0.629048 | 2.926380  |
| 1  | -1.392555 | -2.246068 | 4.759549  |
| 1  | 0.825772  | -3.052808 | 5.580815  |
| 1  | 2.869033  | -2.527907 | 4.362388  |
| 1  | 2.756587  | -0.781951 | 0.988178  |
| 1  | -0.114136 | 0.608168  | -3.685900 |
| 1  | -0.552994 | 1.811388  | -2.490087 |
| 1  | -1.487258 | -1.113922 | -2.481655 |
| 1  | -2.478464 | 0.281902  | -2.862793 |

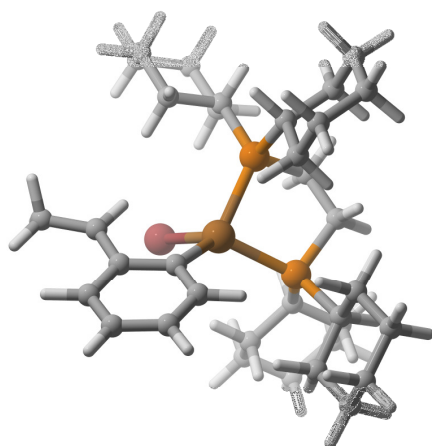

$\kappa$ -2 aryl copper with bromine on copper (entry 32)

RM06 energy: -4781.590401

Sum of electronic and thermal Free Energies: -4780.832421

|    |           |           |           |
|----|-----------|-----------|-----------|
| 6  | -0.648658 | 0.494479  | -2.470057 |
| 6  | -0.607159 | 0.427409  | -2.504032 |
| 6  | 0.854725  | 0.832411  | -2.361724 |
| 15 | 1.665768  | -0.023053 | -0.919833 |
| 6  | 2.146894  | -1.645769 | -1.698296 |
| 1  | 1.198456  | -1.961775 | -2.170331 |
| 6  | 2.492291  | -2.715479 | -0.661818 |
| 6  | 2.651694  | -4.073671 | -1.329257 |
| 6  | 3.701240  | -4.031021 | -2.430698 |
| 6  | 3.389612  | -2.944722 | -3.450166 |
| 6  | 3.216642  | -1.583214 | -2.785317 |
| 1  | 2.972657  | -0.828372 | -3.545300 |
| 1  | 4.175882  | -1.276644 | -2.338433 |
| 1  | 2.460967  | -3.203165 | -3.984310 |
| 1  | 4.179550  | -2.893635 | -4.211808 |
| 1  | 3.783866  | -5.007530 | -2.926648 |
| 1  | 4.687012  | -3.829736 | -1.979972 |
| 1  | 1.681095  | -4.377992 | -1.754637 |
| 1  | 2.910935  | -4.834731 | -0.581158 |
| 1  | 3.431958  | -2.456043 | -0.151416 |
| 1  | 1.707632  | -2.754345 | 0.103307  |
| 6  | 3.245504  | 0.949723  | -0.731867 |
| 1  | 3.745133  | 0.980270  | -1.715584 |
| 6  | 2.940902  | 2.385122  | -0.299760 |
| 6  | 4.208610  | 3.188496  | -0.047441 |
| 6  | 5.097653  | 2.511690  | 0.982014  |
| 6  | 5.433424  | 1.097026  | 0.542163  |
| 6  | 4.177460  | 0.277746  | 0.277900  |
| 1  | 4.464516  | -0.720846 | -0.071522 |
| 1  | 3.630931  | 0.126080  | 1.224302  |
| 1  | 6.038479  | 1.138947  | -0.378235 |
| 1  | 6.052467  | 0.591457  | 1.294928  |
| 1  | 6.013882  | 3.093873  | 1.146659  |
| 1  | 4.571526  | 2.477510  | 1.950328  |
| 1  | 4.764821  | 3.295038  | -0.993045 |
| 1  | 3.946050  | 4.205609  | 0.272783  |
| 1  | 2.330734  | 2.897384  | -1.053833 |
| 1  | 2.335886  | 2.362206  | 0.622292  |
| 29 | -0.067673 | -0.085629 | 0.704411  |
| 15 | -1.551408 | 0.708759  | -0.935082 |
| 6  | -3.259444 | 0.051084  | -1.305897 |
| 6  | -3.277901 | -1.220670 | -2.150420 |

|    |           |           |           |
|----|-----------|-----------|-----------|
| 6  | -4.703305 | -1.712012 | -2.375310 |
| 6  | -5.442485 | -1.920360 | -1.062238 |
| 6  | -5.431083 | -0.649552 | -0.226565 |
| 6  | -4.004127 | -0.178080 | 0.011474  |
| 1  | -3.464153 | -0.955098 | 0.575635  |
| 1  | -3.994451 | 0.731170  | 0.630877  |
| 1  | -6.000399 | 0.137637  | -0.747504 |
| 1  | -5.937676 | -0.814623 | 0.734389  |
| 1  | -4.951579 | -2.728851 | -0.496430 |
| 1  | -6.472483 | -2.251927 | -1.249695 |
| 1  | -5.250442 | -0.972937 | -2.983851 |
| 1  | -4.687865 | -2.641679 | -2.959855 |
| 1  | -2.798647 | -1.043655 | -3.121780 |
| 1  | -2.690892 | -1.999827 | -1.639202 |
| 1  | -3.783952 | 0.842953  | -1.869603 |
| 6  | -1.900711 | 2.541954  | -0.876176 |
| 6  | -2.147064 | 3.213960  | -2.223773 |
| 6  | -2.549510 | 4.672655  | -2.041591 |
| 6  | -1.504356 | 5.437746  | -1.243630 |
| 6  | -1.236652 | 4.766986  | 0.095651  |
| 6  | -0.843750 | 3.306967  | -0.082017 |
| 1  | -0.682824 | 2.826017  | 0.893112  |
| 1  | 0.121664  | 3.254952  | -0.610511 |
| 1  | -0.453289 | 5.304762  | 0.646351  |
| 1  | -2.144940 | 4.821783  | 0.717294  |
| 1  | -0.567117 | 5.477971  | -1.822791 |
| 1  | -1.819715 | 6.479197  | -1.096336 |
| 1  | -2.708371 | 5.145352  | -3.020206 |
| 1  | -3.516118 | 4.717952  | -1.514529 |
| 1  | -1.225349 | 3.172831  | -2.826159 |
| 1  | -2.915749 | 2.678765  | -2.798240 |
| 1  | -2.840606 | 2.588914  | -0.295888 |
| 6  | -1.830349 | -1.041688 | 3.135481  |
| 6  | -2.841420 | -1.816902 | 3.858619  |
| 1  | -3.151175 | -2.664808 | 3.234907  |
| 1  | -2.532280 | -2.185896 | 4.838818  |
| 1  | -3.745950 | -1.200271 | 3.978169  |
| 6  | -0.640582 | -0.502638 | 3.603376  |
| 6  | -0.300965 | -0.571384 | 4.989057  |
| 6  | 0.772227  | 0.128252  | 5.460374  |
| 6  | 1.528760  | 0.905649  | 4.561177  |
| 6  | 1.223927  | 0.951207  | 3.214167  |
| 6  | 0.163856  | 0.217534  | 2.647490  |
| 35 | -0.966756 | -2.717579 | 0.634960  |
| 1  | 1.861548  | 1.557223  | 2.566956  |
| 1  | 2.381477  | 1.468257  | 4.941063  |

|   |           |           |           |
|---|-----------|-----------|-----------|
| 1 | 1.034732  | 0.104327  | 6.514882  |
| 1 | -0.917732 | -1.144532 | 5.678162  |
| 1 | -2.082650 | -0.762302 | 2.114846  |
| 1 | 1.406019  | 0.618374  | -3.287285 |
| 1 | 0.932615  | 1.914000  | -2.198371 |
| 1 | -0.673847 | -0.651590 | -2.696067 |
| 1 | -1.075984 | 0.926155  | -3.362991 |

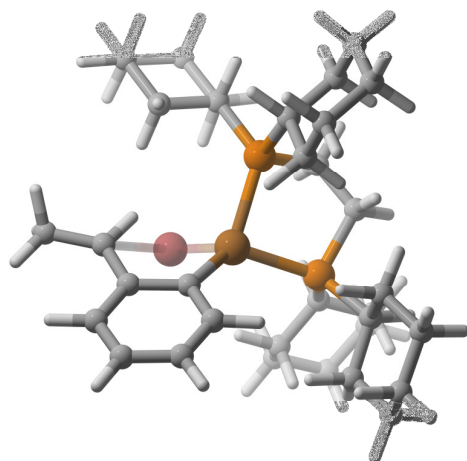

$\kappa$ -2 1,4-bromide shift (entry 35)

RM06 energy: -4781.5901184

Sum of electronic and thermal Free Energies: -4780.830862

Imaginary frequency: -10.8903

|    |           |           |           |
|----|-----------|-----------|-----------|
| 6  | -0.570848 | 0.207979  | -2.499086 |
| 6  | 0.890231  | 0.620777  | -2.372591 |
| 15 | 1.687982  | -0.120898 | -0.861383 |
| 6  | 2.188020  | -1.794765 | -1.510329 |
| 1  | 1.239416  | -2.156978 | -1.947498 |
| 6  | 2.550887  | -2.778213 | -0.397236 |
| 6  | 2.726947  | -4.181261 | -0.960630 |
| 6  | 3.768250  | -4.209134 | -2.070342 |
| 6  | 3.434277  | -3.209481 | -3.167694 |
| 6  | 3.252319  | -1.804272 | -2.604332 |
| 1  | 3.001091  | -1.108153 | -3.416079 |
| 1  | 4.211795  | -1.461730 | -2.185462 |
| 1  | 2.503881  | -3.518643 | -3.670503 |
| 1  | 4.217215  | -3.208464 | -3.938226 |

|    |           |           |           |
|----|-----------|-----------|-----------|
| 1  | 3.861082  | -5.220107 | -2.489546 |
| 1  | 4.754444  | -3.959764 | -1.645314 |
| 1  | 1.757879  | -4.530044 | -1.353188 |
| 1  | 3.002522  | -4.878661 | -0.158009 |
| 1  | 3.488006  | -2.468572 | 0.088263  |
| 1  | 1.767448  | -2.770135 | 0.369659  |
| 6  | 3.259566  | 0.877849  | -0.732497 |
| 1  | 3.771875  | 0.837859  | -1.709659 |
| 6  | 2.938038  | 2.338611  | -0.411819 |
| 6  | 4.192063  | 3.170479  | -0.181688 |
| 6  | 5.064938  | 2.572093  | 0.908184  |
| 6  | 5.424490  | 1.136652  | 0.566576  |
| 6  | 4.181742  | 0.287861  | 0.335511  |
| 1  | 4.484804  | -0.728113 | 0.058163  |
| 1  | 3.620988  | 0.191904  | 1.281259  |
| 1  | 6.044930  | 1.126934  | -0.344478 |
| 1  | 6.036056  | 0.687714  | 1.360246  |
| 1  | 5.970827  | 3.175074  | 1.053808  |
| 1  | 4.518167  | 2.593570  | 1.865357  |
| 1  | 4.768820  | 3.224849  | -1.119400 |
| 1  | 3.910875  | 4.202519  | 0.067126  |
| 1  | 2.348400  | 2.792467  | -1.217925 |
| 1  | 2.304370  | 2.377327  | 0.490224  |
| 29 | -0.085070 | -0.098528 | 0.734603  |
| 15 | -1.528786 | 0.640758  | -0.972062 |
| 6  | -3.255126 | 0.009462  | -1.310953 |
| 6  | -3.318665 | -1.272106 | -2.137195 |
| 6  | -4.760824 | -1.721158 | -2.342135 |
| 6  | -5.491653 | -1.890629 | -1.019099 |
| 6  | -5.433834 | -0.610305 | -0.199443 |
| 6  | -3.991299 | -0.177965 | 0.017432  |
| 1  | -3.466809 | -0.960743 | 0.588389  |
| 1  | -3.947002 | 0.741154  | 0.621344  |
| 1  | -5.985265 | 0.186543  | -0.724827 |
| 1  | -5.935627 | -0.748320 | 0.768198  |
| 1  | -5.018512 | -2.705794 | -0.447942 |
| 1  | -6.533096 | -2.193895 | -1.190780 |
| 1  | -5.290963 | -0.972739 | -2.954139 |
| 1  | -4.780820 | -2.657963 | -2.914916 |
| 1  | -2.842154 | -1.123308 | -3.114843 |
| 1  | -2.751973 | -2.061268 | -1.619744 |
| 1  | -3.766110 | 0.805817  | -1.881007 |
| 6  | -1.832156 | 2.482373  | -1.079366 |
| 6  | -1.973184 | 3.036027  | -2.493444 |
| 6  | -2.321605 | 4.519318  | -2.476570 |
| 6  | -1.296089 | 5.314744  | -1.683173 |

|    |           |           |           |
|----|-----------|-----------|-----------|
| 6  | -1.157789 | 4.769232  | -0.269689 |
| 6  | -0.809751 | 3.287002  | -0.280103 |
| 1  | -0.741039 | 2.894550  | 0.744250  |
| 1  | 0.190010  | 3.154796  | -0.722078 |
| 1  | -0.397685 | 5.331942  | 0.288652  |
| 1  | -2.108393 | 4.913477  | 0.269194  |
| 1  | -0.319564 | 5.251285  | -2.191028 |
| 1  | -1.565728 | 6.378880  | -1.662078 |
| 1  | -2.394453 | 4.900331  | -3.504075 |
| 1  | -3.317274 | 4.654634  | -2.024318 |
| 1  | -1.021615 | 2.903600  | -3.032787 |
| 1  | -2.729910 | 2.475739  | -3.060122 |
| 1  | -2.806416 | 2.600268  | -0.570073 |
| 6  | -1.923758 | -0.842231 | 3.231011  |
| 6  | -2.986235 | -1.488042 | 4.002813  |
| 1  | -3.179477 | -2.479159 | 3.569618  |
| 1  | -2.796073 | -1.592747 | 5.072755  |
| 1  | -3.924479 | -0.931277 | 3.856891  |
| 6  | -0.764059 | -0.234046 | 3.669427  |
| 6  | -0.482383 | -0.106854 | 5.068208  |
| 6  | 0.577407  | 0.641105  | 5.482232  |
| 6  | 1.376638  | 1.287050  | 4.513573  |
| 6  | 1.125053  | 1.155238  | 3.163654  |
| 6  | 0.083374  | 0.351685  | 2.654181  |
| 35 | -0.983453 | -2.688836 | 0.624816  |
| 1  | 1.792530  | 1.667463  | 2.468017  |
| 1  | 2.220556  | 1.890544  | 4.847786  |
| 1  | 0.802651  | 0.756991  | 6.539369  |
| 1  | -1.129695 | -0.584298 | 5.800853  |
| 1  | -2.079479 | -0.799307 | 2.154092  |
| 1  | 1.450340  | 0.340290  | -3.274724 |
| 1  | 0.965379  | 1.711986  | -2.290192 |
| 1  | -0.642892 | -0.883448 | -2.594074 |
| 1  | -1.023832 | 0.631349  | -3.405185 |

## E. Transition state structures in enantiodetermining step

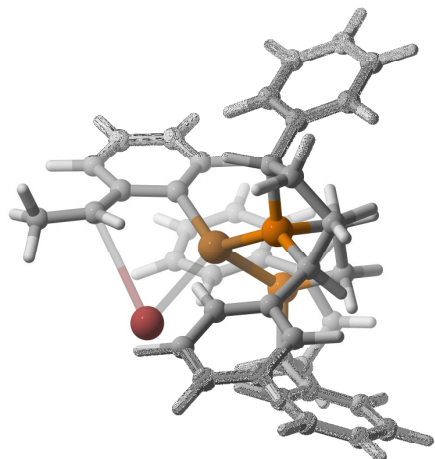

Transfer of bromine from copper to benzyl copper with (*S,S*)-Ph-BPE ligand setting the *R* stereocenter – TS (entry 39)

RB3LYP energy: -5079.019292

Sum of electronic and thermal Free Energies: -5078.357036

Imaginary frequency: -37.7769

|    |           |           |           |
|----|-----------|-----------|-----------|
| 6  | 0.664227  | -0.515679 | -2.387095 |
| 6  | 0.763429  | 0.991737  | -2.159884 |
| 15 | 1.292634  | 1.313028  | -0.406304 |
| 6  | 3.150959  | 1.124274  | -0.610684 |
| 6  | 3.598167  | 2.509579  | -1.102387 |
| 6  | 2.862204  | 3.551085  | -0.272125 |
| 6  | 1.370157  | 3.198938  | -0.220519 |
| 1  | 0.977517  | 3.381643  | 0.787985  |
| 6  | 0.457131  | 3.879701  | -1.196657 |
| 6  | -0.909266 | 3.935198  | -0.913359 |
| 6  | -1.807939 | 4.472674  | -1.821411 |
| 6  | -1.356504 | 4.980518  | -3.033051 |
| 6  | 0.000462  | 4.948542  | -3.319710 |
| 6  | 0.897834  | 4.402038  | -2.411373 |
| 1  | 1.956750  | 4.382873  | -2.662404 |
| 1  | 0.367939  | 5.351171  | -4.261634 |
| 1  | -2.058541 | 5.405275  | -3.747159 |
| 1  | -2.868471 | 4.498356  | -1.576851 |



|    |           |           |           |
|----|-----------|-----------|-----------|
| 1  | -1.271885 | 3.526650  | 0.030478  |
| 1  | 3.024062  | 4.570282  | -0.644712 |
| 1  | 3.264233  | 3.528612  | 0.749603  |
| 1  | 4.686297  | 2.628284  | -1.024107 |
| 1  | 3.345929  | 2.617658  | -2.166014 |
| 1  | 3.307840  | 0.379806  | -1.405231 |
| 6  | 3.909618  | 0.659837  | 0.612239  |
| 6  | 5.282236  | 0.425221  | 0.485860  |
| 6  | 6.038641  | -0.012355 | 1.560422  |
| 6  | 5.434034  | -0.235368 | 2.792625  |
| 6  | 4.072748  | -0.018301 | 2.929685  |
| 6  | 3.318539  | 0.429259  | 1.850432  |
| 1  | 2.243224  | 0.546244  | 1.979041  |
| 1  | 3.576710  | -0.210777 | 3.878950  |
| 1  | 6.023164  | -0.586287 | 3.637188  |
| 1  | 7.105021  | -0.190386 | 1.435049  |
| 1  | 5.761997  | 0.575205  | -0.481986 |
| 1  | 1.453978  | 1.447570  | -2.881785 |
| 1  | -0.212894 | 1.475669  | -2.307780 |
| 15 | -0.488203 | -1.281964 | -1.137738 |
| 29 | -0.446053 | 0.195619  | 0.686115  |
| 6  | -2.167056 | 1.054742  | 1.163856  |
| 6  | -2.609639 | 1.090947  | 2.533479  |
| 6  | -3.991483 | 1.223742  | 2.877105  |
| 6  | -4.921183 | 1.401030  | 1.895470  |
| 6  | -4.499762 | 1.446017  | 0.550460  |
| 6  | -3.171183 | 1.299074  | 0.208722  |
| 1  | -2.908343 | 1.307194  | -0.851759 |
| 1  | -5.248508 | 1.569965  | -0.232265 |
| 1  | -5.974272 | 1.517474  | 2.140118  |
| 1  | -4.301212 | 1.226968  | 3.920376  |
| 6  | -1.629597 | 1.062814  | 3.514523  |
| 6  | -1.803759 | 1.033326  | 4.971769  |
| 1  | -1.069323 | 0.345900  | 5.406409  |
| 1  | -1.565675 | 2.023795  | 5.388282  |
| 1  | -2.802134 | 0.745663  | 5.307156  |
| 1  | -0.607678 | 1.170148  | 3.156738  |
| 35 | 0.067856  | -1.388412 | 2.662786  |
| 6  | -1.951433 | -1.723821 | -2.214878 |
| 6  | -1.531998 | -3.049327 | -2.868998 |
| 6  | -0.891394 | -3.922924 | -1.795946 |
| 6  | 0.064816  | -3.081723 | -0.933808 |
| 1  | -0.119548 | -3.276458 | 0.131794  |
| 6  | 1.539466  | -3.220628 | -1.167146 |
| 6  | 2.076051  | -3.600867 | -2.396432 |
| 6  | 3.449593  | -3.603540 | -2.601481 |

|   |           |           |           |
|---|-----------|-----------|-----------|
| 6 | 4.311133  | -3.219891 | -1.582625 |
| 6 | 3.788554  | -2.852299 | -0.348388 |
| 6 | 2.417121  | -2.857194 | -0.142566 |
| 1 | 2.009739  | -2.555744 | 0.824723  |
| 1 | 4.452154  | -2.556725 | 0.462604  |
| 1 | 5.386829  | -3.215660 | -1.746371 |
| 1 | 3.848849  | -3.904823 | -3.568224 |
| 1 | 1.415166  | -3.885406 | -3.214362 |
| 1 | -0.381381 | -4.789345 | -2.233902 |
| 1 | -1.679591 | -4.331612 | -1.151408 |
| 1 | -2.388950 | -3.546844 | -3.344027 |
| 1 | -0.805851 | -2.837696 | -3.666865 |
| 1 | -2.042070 | -0.935486 | -2.976722 |
| 6 | -3.256373 | -1.807323 | -1.465264 |
| 6 | -4.441375 | -1.528700 | -2.147132 |
| 6 | -5.669500 | -1.581371 | -1.504673 |
| 6 | -5.734914 | -1.916076 | -0.158359 |
| 6 | -4.565913 | -2.202172 | 0.531307  |
| 6 | -3.338838 | -2.148739 | -0.115526 |
| 1 | -2.435451 | -2.343092 | 0.462112  |
| 1 | -4.600697 | -2.455094 | 1.589169  |
| 1 | -6.695311 | -1.950057 | 0.352113  |
| 1 | -6.579595 | -1.355314 | -2.057243 |
| 1 | -4.394437 | -1.258138 | -3.202595 |
| 1 | 0.338141  | -0.734739 | -3.412631 |
| 1 | 1.652337  | -0.979194 | -2.274912 |

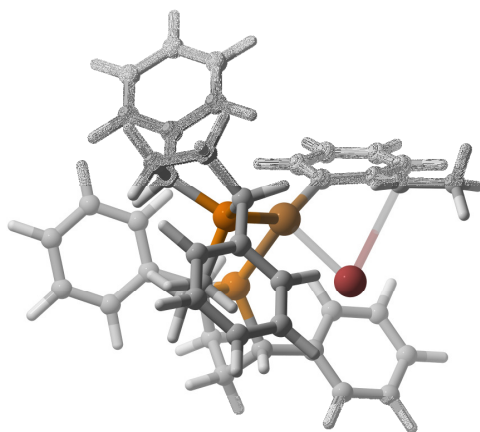

Transfer of bromine from copper to benzyl copper with (*S,S*)-Ph-BPE ligand setting the *S* stereocenter – TS (entry 40)

RM06 energy: -5079.0159294

Sum of electronic and thermal Free Energies: -5078.352705

Imaginary frequency: -4.2147

|    |           |           |           |
|----|-----------|-----------|-----------|
| 6  | 1.668074  | 1.036731  | -1.497599 |
| 6  | 1.052978  | -0.184163 | -2.176624 |
| 15 | -0.571422 | -0.674074 | -1.405593 |
| 6  | -1.804552 | 0.036025  | -2.616238 |
| 6  | -1.789094 | -0.968533 | -3.777493 |
| 6  | -1.858866 | -2.362148 | -3.169230 |
| 6  | -0.865075 | -2.463975 | -1.999438 |
| 1  | -1.356261 | -2.948066 | -1.144410 |
| 6  | 0.418699  | -3.192223 | -2.253452 |
| 6  | 1.104923  | -3.758840 | -1.177919 |
| 6  | 2.328455  | -4.385999 | -1.360308 |
| 6  | 2.895373  | -4.456590 | -2.626036 |
| 6  | 2.223589  | -3.897093 | -3.704539 |
| 6  | 0.998205  | -3.272931 | -3.519632 |
| 1  | 0.492011  | -2.831973 | -4.376904 |
| 1  | 2.656993  | -3.947368 | -4.701422 |
| 1  | 3.853078  | -4.951247 | -2.772568 |
| 1  | 2.836567  | -4.829489 | -0.506207 |
| 1  | 0.669553  | -3.702070 | -0.178660 |
| 1  | -1.684288 | -3.146353 | -3.915535 |
| 1  | -2.873044 | -2.526880 | -2.784842 |
| 1  | -2.621828 | -0.784429 | -4.469398 |
| 1  | -0.863204 | -0.848876 | -4.357360 |
| 1  | -1.418086 | 1.013261  | -2.937397 |
| 6  | -3.192034 | 0.228055  | -2.056782 |
| 6  | -4.044873 | 1.131365  | -2.690045 |
| 6  | -5.336531 | 1.339219  | -2.233698 |
| 6  | -5.806879 | 0.636739  | -1.131740 |
| 6  | -4.975451 | -0.275324 | -0.500277 |
| 6  | -3.680961 | -0.476666 | -0.960544 |
| 1  | -3.034893 | -1.169399 | -0.421607 |
| 1  | -5.325275 | -0.828797 | 0.369607  |
| 1  | -6.818117 | 0.803422  | -0.766428 |
| 1  | -5.977569 | 2.061903  | -2.734692 |
| 1  | -3.675852 | 1.697401  | -3.545793 |
| 1  | 0.949211  | -0.006186 | -3.255336 |
| 1  | 1.727420  | -1.044371 | -2.072952 |
| 15 | 1.710227  | 0.810040  | 0.340862  |
| 29 | -0.436494 | 0.107609  | 0.834525  |
| 6  | -1.570327 | -0.776716 | 2.162733  |

|    |           |           |           |
|----|-----------|-----------|-----------|
| 6  | -2.602653 | -0.070266 | 2.881376  |
| 6  | -3.733197 | -0.748712 | 3.438739  |
| 6  | -3.811121 | -2.107667 | 3.374197  |
| 6  | -2.765821 | -2.827254 | 2.755189  |
| 6  | -1.686787 | -2.182770 | 2.189394  |
| 1  | -0.916059 | -2.786112 | 1.705003  |
| 1  | -2.829983 | -3.914560 | 2.714459  |
| 1  | -4.653701 | -2.638616 | 3.810228  |
| 1  | -4.512332 | -0.187970 | 3.951055  |
| 6  | -2.414878 | 1.286022  | 3.086061  |
| 6  | -3.314467 | 2.241417  | 3.741134  |
| 1  | -2.881387 | 2.552779  | 4.703579  |
| 1  | -3.361058 | 3.153567  | 3.133858  |
| 1  | -4.328883 | 1.876977  | 3.914245  |
| 1  | -1.448353 | 1.676943  | 2.773797  |
| 35 | -1.545398 | 2.473786  | 0.254453  |
| 6  | 3.177974  | -0.345421 | 0.537895  |
| 6  | 4.369188  | 0.585350  | 0.819140  |
| 6  | 3.870141  | 1.738916  | 1.678864  |
| 6  | 2.607451  | 2.330608  | 1.042130  |
| 1  | 1.932892  | 2.709508  | 1.820908  |
| 6  | 2.816740  | 3.435362  | 0.039975  |
| 6  | 4.038988  | 3.677779  | -0.585933 |
| 6  | 4.172812  | 4.694561  | -1.523663 |
| 6  | 3.085860  | 5.487821  | -1.856931 |
| 6  | 1.864877  | 5.262876  | -1.233879 |
| 6  | 1.734120  | 4.251915  | -0.295525 |
| 1  | 0.765745  | 4.068887  | 0.171763  |
| 1  | 1.002733  | 5.879641  | -1.479744 |
| 1  | 3.190286  | 6.281170  | -2.594023 |
| 1  | 5.138554  | 4.864918  | -1.995807 |
| 1  | 4.912719  | 3.078260  | -0.338869 |
| 1  | 4.638448  | 2.507277  | 1.830964  |
| 1  | 3.621626  | 1.355691  | 2.677734  |
| 1  | 5.189710  | 0.039211  | 1.302904  |
| 1  | 4.757528  | 0.962076  | -0.136064 |
| 1  | 3.329238  | -0.848201 | -0.427868 |
| 6  | 3.008972  | -1.410842 | 1.589774  |
| 6  | 3.642253  | -2.640289 | 1.400984  |
| 6  | 3.559480  | -3.646845 | 2.351000  |
| 6  | 2.841378  | -3.440390 | 3.521800  |
| 6  | 2.211469  | -2.221981 | 3.727877  |
| 6  | 2.294917  | -1.217661 | 2.771952  |
| 1  | 1.763882  | -0.282314 | 2.941627  |
| 1  | 1.639284  | -2.048750 | 4.637103  |
| 1  | 2.770455  | -4.227897 | 4.268990  |

|   |          |           |           |
|---|----------|-----------|-----------|
| 1 | 4.058258 | -4.598819 | 2.176265  |
| 1 | 4.205712 | -2.808922 | 0.482729  |
| 1 | 2.673107 | 1.227952  | -1.898035 |
| 1 | 1.070243 | 1.937419  | -1.687150 |

## F. Starting materials, product, and other intermediates

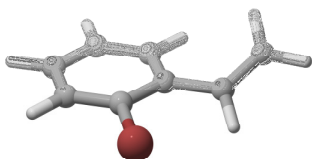

2-bromostyrene (entry 41)

RM06 energy: -2882.881315

Sum of electronic and thermal Free Energies: -2882.792882

|    |           |           |           |
|----|-----------|-----------|-----------|
| 6  | -2.653897 | -1.080356 | -0.023764 |
| 6  | -1.720826 | -2.104393 | 0.071642  |
| 6  | -0.367800 | -1.803615 | 0.070051  |
| 6  | 0.040759  | -0.481561 | -0.024571 |
| 6  | -0.872611 | 0.574420  | -0.117262 |
| 6  | -2.230825 | 0.233028  | -0.121168 |
| 1  | -2.965768 | 1.028374  | -0.229276 |
| 6  | -0.457157 | 1.977099  | -0.222253 |
| 6  | -1.148943 | 3.009548  | 0.249803  |
| 1  | -2.083780 | 2.884559  | 0.794216  |
| 1  | -0.793083 | 4.028685  | 0.123363  |
| 1  | 0.492271  | 2.168392  | -0.722567 |
| 35 | 1.920127  | -0.143108 | 0.013889  |
| 1  | 0.371356  | -2.596704 | 0.146315  |
| 1  | -2.040699 | -3.141125 | 0.141325  |
| 1  | -3.716946 | -1.308421 | -0.034370 |

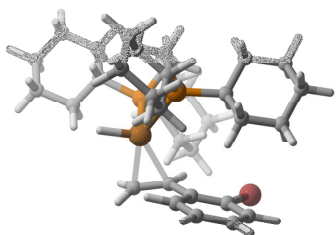

$\pi$ -acid complex between (dCyp)CuH and 2-bromostyrene (entry 42)

RM06 energy: -4781.5718157

Sum of electronic and thermal Free Energies: -4780.817536

|    |           |           |           |
|----|-----------|-----------|-----------|
| 6  | 0.861220  | 1.655967  | 1.716481  |
| 15 | -0.659036 | 1.368299  | 0.705079  |
| 6  | -1.656694 | 0.206626  | 1.775349  |
| 1  | -1.170716 | -0.772008 | 1.604130  |
| 6  | -1.640885 | 0.487270  | 3.275379  |
| 6  | -2.436628 | -0.566118 | 4.039422  |
| 6  | -3.862900 | -0.683241 | 3.524974  |
| 6  | -3.879256 | -0.957336 | 2.029410  |
| 6  | -3.096876 | 0.106225  | 1.272928  |
| 1  | -3.598834 | 1.077042  | 1.415076  |
| 1  | -3.114800 | -0.099099 | 0.196597  |
| 1  | -3.436207 | -1.947195 | 1.829175  |
| 1  | -4.910069 | -0.999957 | 1.651608  |
| 1  | -4.399242 | 0.258726  | 3.725369  |
| 1  | -4.403566 | -1.468802 | 4.069244  |
| 1  | -1.932579 | -1.540464 | 3.930524  |
| 1  | -2.430420 | -0.333613 | 5.112708  |
| 1  | -0.614322 | 0.513437  | 3.660612  |
| 1  | -2.072268 | 1.483380  | 3.468578  |
| 6  | -1.580596 | 2.988749  | 0.774114  |
| 1  | -2.196438 | 2.974661  | 1.690072  |
| 6  | -0.657128 | 4.204522  | 0.847179  |
| 6  | -1.455171 | 5.502402  | 0.862506  |
| 6  | -2.384170 | 5.610255  | -0.335902 |
| 6  | -3.304122 | 4.402237  | -0.414677 |
| 6  | -2.502637 | 3.109385  | -0.441975 |
| 1  | -1.880376 | 3.082797  | -1.351081 |
| 1  | -3.175478 | 2.245288  | -0.509967 |
| 1  | -3.947952 | 4.462495  | -1.302231 |
| 1  | -3.978175 | 4.397239  | 0.457859  |
| 1  | -1.782378 | 5.665070  | -1.257205 |
| 1  | -2.966597 | 6.540083  | -0.288687 |
| 1  | -2.051896 | 5.545335  | 1.788463  |
| 1  | -0.769462 | 6.359375  | 0.897709  |
| 1  | 0.019907  | 4.198988  | -0.022909 |
| 1  | -0.021694 | 4.157580  | 1.740185  |
| 29 | 0.276272  | 0.682753  | -1.313336 |
| 1  | 0.748424  | 2.004203  | -2.139017 |
| 15 | 2.295186  | -0.050391 | 0.040601  |
| 6  | 1.743848  | 0.414841  | 1.751456  |
| 1  | 2.594862  | 0.575117  | 2.424966  |
| 1  | 1.187984  | -0.444674 | 2.151861  |
| 6  | 3.681725  | 1.147222  | -0.293734 |
| 1  | 3.174983  | 2.127692  | -0.243125 |

|   |           |           |           |
|---|-----------|-----------|-----------|
| 6 | 4.856951  | 1.168178  | 0.677308  |
| 6 | 5.852453  | 2.260940  | 0.304416  |
| 6 | 6.347248  | 2.088454  | -1.123423 |
| 6 | 5.185366  | 2.049188  | -2.104479 |
| 6 | 4.173669  | 0.973335  | -1.730814 |
| 1 | 4.643694  | -0.018393 | -1.841594 |
| 1 | 3.319527  | 0.996446  | -2.421601 |
| 1 | 4.678195  | 3.027213  | -2.109374 |
| 1 | 5.549955  | 1.885530  | -3.127418 |
| 1 | 6.915566  | 1.146734  | -1.196473 |
| 1 | 7.046852  | 2.892217  | -1.388448 |
| 1 | 6.695851  | 2.259180  | 1.007973  |
| 1 | 5.365571  | 3.244237  | 0.405731  |
| 1 | 5.375887  | 0.196900  | 0.649776  |
| 1 | 4.512260  | 1.312756  | 1.710126  |
| 6 | 3.130317  | -1.711171 | 0.285809  |
| 1 | 3.979741  | -1.700569 | -0.419326 |
| 6 | 3.668467  | -2.003140 | 1.686108  |
| 6 | 4.335407  | -3.371218 | 1.752594  |
| 6 | 3.374314  | -4.470891 | 1.330025  |
| 6 | 2.820028  | -4.200517 | -0.059462 |
| 6 | 2.176877  | -2.824034 | -0.152251 |
| 1 | 1.275825  | -2.794540 | 0.486904  |
| 1 | 1.832062  | -2.641892 | -1.179407 |
| 1 | 3.640151  | -4.259671 | -0.793343 |
| 1 | 2.094307  | -4.973926 | -0.345341 |
| 1 | 2.541912  | -4.520312 | 2.051068  |
| 1 | 3.868927  | -5.450542 | 1.362481  |
| 1 | 5.216775  | -3.381471 | 1.091073  |
| 1 | 4.710097  | -3.555132 | 2.768524  |
| 1 | 4.368538  | -1.224797 | 2.010754  |
| 1 | 2.835395  | -1.988231 | 2.405945  |
| 1 | 0.608519  | 1.987698  | 2.731820  |
| 1 | 1.402758  | 2.485996  | 1.245438  |
| 6 | -0.641808 | -1.202163 | -2.078995 |
| 6 | 0.143243  | -0.585182 | -3.014215 |
| 1 | -0.278108 | -0.024936 | -3.844820 |
| 1 | 1.194136  | -0.848212 | -3.108332 |
| 1 | -0.177963 | -1.925092 | -1.412931 |
| 6 | -2.105395 | -1.142406 | -2.061913 |
| 6 | -2.893753 | -2.112288 | -1.429974 |
| 6 | -4.280983 | -2.064346 | -1.438557 |
| 6 | -4.928048 | -1.024800 | -2.086469 |
| 6 | -4.176344 | -0.041983 | -2.721430 |
| 6 | -2.796218 | -0.104367 | -2.706003 |
| 1 | -2.220986 | 0.687101  | -3.183169 |



|    |           |           |           |
|----|-----------|-----------|-----------|
| 1  | -4.671460 | 0.784272  | -3.226561 |
| 1  | -6.014457 | -0.984378 | -2.092495 |
| 1  | -4.853196 | -2.838195 | -0.932672 |
| 35 | -2.094637 | -3.579163 | -0.496297 |

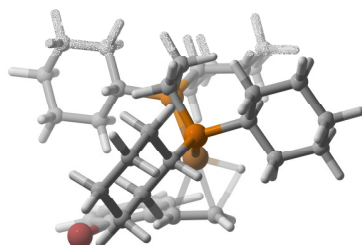

Hydrometallation (entry 43)

RM06 energy: -4781.557306

Sum of electronic and thermal Free Energies: -4780.801848

Imaginary frequency: -869.8164

|    |           |           |           |
|----|-----------|-----------|-----------|
| 6  | 0.880692  | 1.709272  | 1.871005  |
| 15 | -0.628295 | 1.432485  | 0.829952  |
| 6  | -1.710101 | 0.527966  | 2.047378  |
| 1  | -1.004902 | -0.203581 | 2.484117  |
| 6  | -2.273759 | 1.369532  | 3.189229  |
| 6  | -3.026089 | 0.495829  | 4.186588  |
| 6  | -4.123025 | -0.307086 | 3.503311  |
| 6  | -3.558381 | -1.146510 | 2.366773  |
| 6  | -2.805920 | -0.284972 | 1.363445  |
| 1  | -3.517331 | 0.386748  | 0.857636  |
| 1  | -2.364963 | -0.907863 | 0.575899  |
| 1  | -2.871124 | -1.903373 | 2.779532  |
| 1  | -4.359552 | -1.701334 | 1.859243  |
| 1  | -4.879113 | 0.386689  | 3.100370  |
| 1  | -4.643658 | -0.942511 | 4.231830  |
| 1  | -2.316296 | -0.195051 | 4.669664  |
| 1  | -3.445758 | 1.118049  | 4.988223  |
| 1  | -1.476185 | 1.923240  | 3.703541  |
| 1  | -2.965406 | 2.124803  | 2.785061  |
| 6  | -1.331294 | 3.143822  | 0.649505  |
| 6  | -2.701167 | 3.090349  | -0.026541 |

|    |           |           |           |
|----|-----------|-----------|-----------|
| 6  | -3.281414 | 4.481817  | -0.235960 |
| 6  | -2.332224 | 5.362177  | -1.032032 |
| 6  | -0.969577 | 5.427922  | -0.361474 |
| 6  | -0.384860 | 4.036840  | -0.153891 |
| 1  | -0.197215 | 3.565869  | -1.132698 |
| 1  | 0.592435  | 4.116973  | 0.339856  |
| 1  | -1.068579 | 5.930612  | 0.614329  |
| 1  | -0.275898 | 6.038227  | -0.954816 |
| 1  | -2.217073 | 4.945916  | -2.045851 |
| 1  | -2.751054 | 6.369689  | -1.155290 |
| 1  | -3.472136 | 4.946363  | 0.745445  |
| 1  | -4.255493 | 4.408373  | -0.737390 |
| 1  | -2.592250 | 2.587355  | -1.002224 |
| 1  | -3.401819 | 2.478648  | 0.555509  |
| 1  | -1.444180 | 3.571023  | 1.660779  |
| 6  | 1.773266  | 0.474371  | 1.907506  |
| 15 | 2.267043  | -0.052029 | 0.201283  |
| 6  | 3.575145  | 1.175792  | -0.282105 |
| 1  | 3.015912  | 2.129913  | -0.299433 |
| 6  | 4.771004  | 1.336044  | 0.650300  |
| 6  | 5.708887  | 2.429211  | 0.151300  |
| 6  | 6.170393  | 2.156849  | -1.272083 |
| 6  | 4.983833  | 1.986145  | -2.208836 |
| 6  | 4.037064  | 0.902005  | -1.713043 |
| 1  | 4.553236  | -0.071461 | -1.754188 |
| 1  | 3.165248  | 0.823184  | -2.376810 |
| 1  | 4.433126  | 2.938026  | -2.278002 |
| 1  | 5.325204  | 1.751881  | -3.225875 |
| 1  | 6.776599  | 1.236239  | -1.284555 |
| 1  | 6.826761  | 2.963626  | -1.624401 |
| 1  | 6.571246  | 2.520873  | 0.825007  |
| 1  | 5.184605  | 3.397835  | 0.185343  |
| 1  | 5.327602  | 0.386040  | 0.702158  |
| 1  | 4.443017  | 1.563941  | 1.673503  |
| 6  | 3.146793  | -1.681129 | 0.451468  |
| 1  | 3.983412  | -1.661222 | -0.268144 |
| 6  | 3.717311  | -1.934795 | 1.845773  |
| 6  | 4.405883  | -3.291635 | 1.923672  |
| 6  | 3.455762  | -4.414023 | 1.536476  |
| 6  | 2.875357  | -4.179220 | 0.150863  |
| 6  | 2.206561  | -2.816780 | 0.045355  |
| 1  | 1.311309  | -2.791381 | 0.691862  |
| 1  | 1.841551  | -2.650781 | -0.977787 |
| 1  | 3.684657  | -4.239404 | -0.594967 |
| 1  | 2.157537  | -4.969293 | -0.108411 |
| 1  | 2.635382  | -4.463257 | 2.271043  |

|    |           |           |           |
|----|-----------|-----------|-----------|
| 1  | 3.967231  | -5.384625 | 1.579860  |
| 1  | 5.275602  | -3.299690 | 1.246897  |
| 1  | 4.801294  | -3.452106 | 2.935711  |
| 1  | 4.413305  | -1.139003 | 2.138231  |
| 1  | 2.899324  | -1.916145 | 2.582557  |
| 1  | 2.641607  | 0.650846  | 2.553544  |
| 1  | 1.230197  | -0.375104 | 2.345259  |
| 1  | 0.588200  | 2.001047  | 2.888904  |
| 1  | 1.432609  | 2.559325  | 1.452358  |
| 29 | 0.235959  | 0.358277  | -1.005008 |
| 1  | 0.577494  | 1.269525  | -2.325082 |
| 6  | -0.650730 | -1.213233 | -2.209656 |
| 6  | 0.060222  | -0.283324 | -3.003144 |
| 1  | -0.468399 | 0.302582  | -3.750863 |
| 1  | 1.067314  | -0.557569 | -3.310697 |
| 1  | -0.113900 | -2.084330 | -1.846756 |
| 6  | -2.091001 | -1.219246 | -2.093666 |
| 6  | -2.821429 | -2.279375 | -1.522982 |
| 6  | -4.203433 | -2.277267 | -1.421410 |
| 6  | -4.934329 | -1.193450 | -1.886512 |
| 6  | -4.251600 | -0.118897 | -2.448847 |
| 6  | -2.874283 | -0.135012 | -2.547121 |
| 1  | -2.366239 | 0.729952  | -2.970424 |
| 1  | -4.801830 | 0.748683  | -2.809356 |
| 1  | -6.018563 | -1.191184 | -1.807175 |
| 1  | -4.710382 | -3.126225 | -0.968040 |
| 35 | -1.908832 | -3.792068 | -0.778891 |

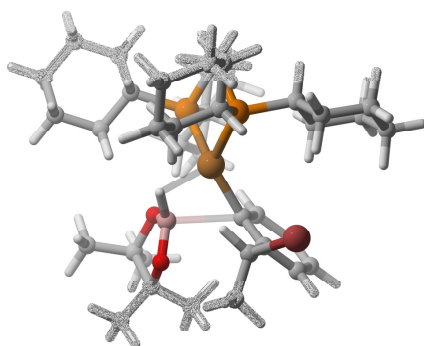

Hydroboration of aryl copper (entry 44)

RM06 energy: -5193.3131562

Sum of electronic and thermal Free Energies: -5192.369021

Imaginary frequency: -120.0498

|    |           |           |           |
|----|-----------|-----------|-----------|
| 6  | -0.735927 | -2.874707 | 1.301367  |
| 15 | -1.693312 | -1.454401 | 0.597537  |
| 6  | -2.726276 | -2.305561 | -0.703193 |
| 6  | -3.738072 | -3.341733 | -0.222415 |
| 6  | -4.384025 | -4.064247 | -1.398986 |
| 6  | -5.036690 | -3.080907 | -2.358644 |
| 6  | -4.037244 | -2.037560 | -2.833440 |
| 6  | -3.387118 | -1.315752 | -1.661793 |
| 1  | -4.154088 | -0.738631 | -1.121826 |
| 1  | -2.656688 | -0.578597 | -2.013618 |
| 1  | -3.254690 | -2.529907 | -3.433724 |
| 1  | -4.524339 | -1.311276 | -3.498923 |
| 1  | -5.477980 | -3.611428 | -3.212776 |
| 1  | -5.870115 | -2.574864 | -1.844191 |
| 1  | -3.614452 | -4.641728 | -1.936320 |
| 1  | -5.119393 | -4.793683 | -1.033621 |
| 1  | -4.524904 | -2.836242 | 0.358345  |
| 1  | -3.269624 | -4.069697 | 0.453009  |
| 1  | -1.947636 | -2.837355 | -1.284105 |
| 6  | -2.743999 | -0.913655 | 2.037908  |
| 1  | -1.986633 | -0.383446 | 2.647920  |
| 6  | -3.370776 | -1.968967 | 2.948464  |
| 6  | -3.994475 | -1.302241 | 4.170736  |
| 6  | -5.020152 | -0.249295 | 3.773878  |
| 6  | -4.417146 | 0.784687  | 2.834581  |
| 6  | -3.788104 | 0.122417  | 1.617132  |
| 1  | -4.579444 | -0.382055 | 1.037899  |
| 1  | -3.347867 | 0.870268  | 0.944702  |
| 1  | -3.646577 | 1.363201  | 3.371071  |
| 1  | -5.180812 | 1.508716  | 2.518516  |
| 1  | -5.436799 | 0.234483  | 4.667340  |
| 1  | -5.865394 | -0.743901 | 3.267534  |
| 1  | -3.197893 | -0.827649 | 4.766249  |
| 1  | -4.454285 | -2.060348 | 4.818941  |
| 1  | -4.150827 | -2.524961 | 2.408465  |
| 1  | -2.624162 | -2.707720 | 3.267918  |
| 29 | 0.081574  | -0.000443 | -0.098773 |
| 6  | 0.360896  | 1.889489  | 0.580484  |
| 6  | 1.515641  | 2.667663  | 0.373150  |
| 6  | 1.869543  | 3.690964  | 1.257663  |
| 6  | 1.101046  | 3.962286  | 2.377670  |
| 6  | -0.053723 | 3.219485  | 2.604057  |

|    |           |           |           |
|----|-----------|-----------|-----------|
| 6  | -0.408475 | 2.219886  | 1.708563  |
| 1  | -1.339209 | 1.677158  | 1.889083  |
| 1  | -0.675599 | 3.427215  | 3.474914  |
| 1  | 1.395650  | 4.753265  | 3.065311  |
| 1  | 2.772407  | 4.277136  | 1.079497  |
| 6  | 2.343868  | 2.452283  | -0.858189 |
| 35 | 4.216961  | 1.890905  | -0.371194 |
| 1  | 1.973102  | 1.578746  | -1.401386 |
| 6  | 2.467256  | 3.646673  | -1.771620 |
| 1  | 1.467568  | 3.908098  | -2.136492 |
| 1  | 2.888604  | 4.515908  | -1.254790 |
| 1  | 3.098639  | 3.426529  | -2.638679 |
| 15 | 1.576962  | -1.772552 | 0.125635  |
| 6  | 0.461281  | -3.226794 | 0.424779  |
| 1  | 1.031950  | -4.052426 | 0.870112  |
| 1  | 0.118067  | -3.578264 | -0.558175 |
| 6  | 2.635413  | -1.797221 | 1.672619  |
| 6  | 2.091564  | -0.762208 | 2.662194  |
| 6  | 2.887960  | -0.740681 | 3.957835  |
| 6  | 4.359939  | -0.479139 | 3.682818  |
| 6  | 4.915699  | -1.509708 | 2.713511  |
| 6  | 4.118986  | -1.545889 | 1.414904  |
| 1  | 4.232217  | -0.584126 | 0.894443  |
| 1  | 4.537653  | -2.312611 | 0.750953  |
| 1  | 4.885843  | -2.505366 | 3.185606  |
| 1  | 5.971905  | -1.304415 | 2.493316  |
| 1  | 4.470270  | 0.527099  | 3.246222  |
| 1  | 4.936048  | -0.478202 | 4.617668  |
| 1  | 2.478315  | 0.023160  | 4.632364  |
| 1  | 2.778037  | -1.707619 | 4.476049  |
| 1  | 2.138610  | 0.233077  | 2.192429  |
| 1  | 1.027637  | -0.943428 | 2.870941  |
| 1  | 2.522527  | -2.803338 | 2.113394  |
| 6  | 2.641783  | -2.349422 | -1.281485 |
| 6  | 3.101582  | -3.803635 | -1.213169 |
| 6  | 3.995192  | -4.147657 | -2.397728 |
| 6  | 3.278232  | -3.883080 | -3.713469 |
| 6  | 2.798146  | -2.442078 | -3.795918 |
| 6  | 1.927017  | -2.068117 | -2.604458 |
| 1  | 0.983018  | -2.639242 | -2.642877 |
| 1  | 1.644951  | -1.007496 | -2.659577 |
| 1  | 3.671636  | -1.770803 | -3.821190 |
| 1  | 2.249703  | -2.270086 | -4.731451 |
| 1  | 2.412325  | -4.560370 | -3.793468 |
| 1  | 3.932597  | -4.117663 | -4.563226 |
| 1  | 4.912630  | -3.538761 | -2.351995 |

|   |           |           |           |
|---|-----------|-----------|-----------|
| 1 | 4.315346  | -5.196311 | -2.337474 |
| 1 | 2.222618  | -4.465991 | -1.232618 |
| 1 | 3.618249  | -4.007858 | -0.265499 |
| 1 | 3.529382  | -1.696043 | -1.245100 |
| 1 | -1.370948 | -3.758231 | 1.443578  |
| 1 | -0.400886 | -2.570108 | 2.302767  |
| 1 | -0.476821 | 0.499330  | -1.830084 |
| 5 | -0.943000 | 1.569343  | -1.420503 |
| 8 | -2.246751 | 1.659230  | -0.948921 |
| 6 | -2.857647 | 2.806658  | -1.558645 |
| 6 | -1.629602 | 3.685704  | -1.953141 |
| 8 | -0.597952 | 2.699193  | -2.149190 |
| 6 | -1.790051 | 4.459508  | -3.243983 |
| 1 | -0.883527 | 5.046304  | -3.436213 |
| 1 | -1.948209 | 3.803466  | -4.104481 |
| 1 | -2.630863 | 5.161777  | -3.181796 |
| 6 | -1.199973 | 4.642160  | -0.852558 |
| 1 | -0.231840 | 5.084903  | -1.112950 |
| 1 | -1.919113 | 5.461726  | -0.736669 |
| 1 | -1.087795 | 4.141465  | 0.112880  |
| 6 | -3.805649 | 3.441150  | -0.563926 |
| 1 | -4.217033 | 4.382387  | -0.950134 |
| 1 | -4.649969 | 2.766432  | -0.374367 |
| 1 | -3.318600 | 3.643097  | 0.395958  |
| 6 | -3.641401 | 2.307067  | -2.762470 |
| 1 | -2.990027 | 1.816519  | -3.495730 |
| 1 | -4.379166 | 1.569276  | -2.426212 |
| 1 | -4.181827 | 3.115906  | -3.268110 |

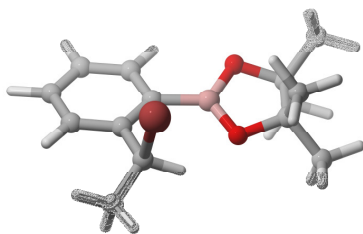

Benzyl bromide product (entry 45)

RM06 energy: -3294.6411658

Sum of electronic and thermal Free Energies: -3294.368892

|    |           |           |           |
|----|-----------|-----------|-----------|
| 6  | 1.824469  | -0.699921 | 0.853291  |
| 6  | 1.800762  | 0.734079  | 0.416232  |
| 6  | 0.590109  | 1.360324  | 0.057351  |
| 6  | 0.636075  | 2.691353  | -0.370698 |
| 6  | 1.825886  | 3.399667  | -0.438908 |
| 6  | 3.009986  | 2.772269  | -0.083066 |
| 6  | 2.992976  | 1.450317  | 0.335895  |
| 1  | 3.933999  | 0.972524  | 0.598806  |
| 1  | 3.954270  | 3.310450  | -0.133511 |
| 1  | 1.828990  | 4.435382  | -0.770989 |
| 1  | -0.292633 | 3.182883  | -0.654385 |
| 5  | -0.817370 | 0.687916  | 0.081260  |
| 8  | -1.163380 | -0.436244 | 0.780201  |
| 6  | -2.491443 | -0.821610 | 0.341491  |
| 6  | -3.064834 | 0.527516  | -0.182150 |
| 8  | -1.868670 | 1.224526  | -0.608742 |
| 6  | -3.698850 | 1.372489  | 0.907301  |
| 1  | -4.652925 | 0.953069  | 1.245006  |
| 1  | -3.041705 | 1.477892  | 1.777946  |
| 1  | -3.893541 | 2.375849  | 0.512971  |
| 6  | -4.004039 | 0.404212  | -1.357965 |
| 1  | -4.356338 | 1.397541  | -1.657668 |
| 1  | -3.521117 | -0.054660 | -2.225373 |
| 1  | -3.259542 | -2.262278 | -1.096870 |
| 6  | -3.237831 | -1.422407 | 1.508099  |
| 1  | -4.275514 | -1.646160 | 1.232130  |
| 1  | -2.763365 | -2.363750 | 1.806820  |
| 1  | -3.247643 | -0.760184 | 2.378126  |
| 6  | -2.302145 | -1.860771 | -0.747035 |
| 1  | -4.883996 | -0.195042 | -1.093957 |
| 1  | -1.758688 | -1.457577 | -1.609025 |
| 1  | -1.715859 | -2.693835 | -0.344803 |
| 6  | 2.916147  | -1.102304 | 1.810755  |
| 1  | 2.784873  | -2.140944 | 2.128258  |
| 1  | 3.919244  | -1.012108 | 1.382822  |
| 1  | 2.871362  | -0.468638 | 2.706002  |
| 35 | 1.973710  | -1.846692 | -0.785882 |
| 1  | 0.849918  | -0.993314 | 1.242026  |

## IX. References

- 1) Armarego, W.L.F.; Chai, C.L.L. *Purification of Laboratory Chemicals* 6<sup>th</sup> ed., Elsevier: Burlington, MA, 2009. Still, W. C.; Kahn, M.; Mitra, A. *J. Org. Chem.* **1978**, *43*, 2923.
- 2) Still, W. C.; Kahn, M.; Mitra, A. *J. Org. Chem.* **1978**, *43*, 2923.
- 3) R. D. Grigg, R. Van Hoveln, J. M. Schomaker, *J. Am. Chem. Soc.* **2012**, *134*, 16131-16134.
- 4) Luliński, S.; Serwatowski, J.; Szczerbińska, M. *Eur. J. Org. Chem.* **2008**, 1797.
- 5) Ohwada, T.; Tani, N.; Sakamaki, Y.; Kabasawa, Y.; Otani, Y.; Kawahata, M.; Yamaguchi, K. *Proc. Natl. Acad. Sci. U.S.A.* **2013**, *110*, 4206-4211.
- 6) (a) Matyjaszewski, K.; Xia, J. *Chem. Rev.* **2001**, *101*, 2921-2990. (b) Wang, J.-S.; Matyjaszewski, K. *Macromolecules* **1995**, *28*, 7901-7910.
- 7) Van Hoveln, R. J.; Schmid, S. C.; Tretbar, M.; Buttke, C. T.; Schomaker, J. M. *Chem. Sci.* **2014**, *Advance Article*, DOI: 10.1039/C4SC02040E.
- 8) Sharpless, K. B.; Young, M. W.; Lauer, R. F. *Tetrahedron Lett.* **1973**, *22*, 1979-1982.
- 9) Callant, P.; Ongena, R.; Vandewalle, M. *Tetrahedron*, **1981**, *37*, 2085-2089.
- 10) (a) GAUSSIAN03, Revision D.01, Frisch, M. J.; Trucks, G. W.; Schlegel, H. B.; Scuseria, G. E.; Robb, M. A.; Cheeseman, J. R.; Montgomery, Jr., J. A.; Vreven, T.; Kudin, K. N.; Burant, J. C.; Millam, J. M.; Iyengar, S. S.; Tomasi, J.; Barone, V.; Mennucci, B.; Cossi, M.; Scalmani, G.; Rega, N.; Petersson, G. A.; Nakatsuji, H.; Hada, M.; Ehara, M.; Toyota, K.; Fukuda, R.; Hasegawa, J.; Ishida, M.; Nakajima, T.; Honda, Y.; Kitao, O.; Nakai, H.; Klene, M.; Li, X.; Knox, J. E.; Hratchian, H. P.; Cross, J. B.; Bakken, V.; Adamo, C.; Jaramillo, J.; Gomperts, R.; Stratmann, R. E.; Yazyev, O.; Austin, A. J.; Cammi, R.; Pomelli, C.; Ochterski, J. W.; Ayala, P. Y.; Morokuma, K.; Voth, G. A.; Salvador, P.; Dannenberg, J. J.; Zakrzewski, V. G.; Dapprich, S.; Daniels, A. D.; Strain, M. C.; Farkas, O.; Malick, D. K.; Rabuck, A. D.; Raghavachari, K.; Foresman, J. B.; Ortiz, J. V.; Cui, Q.; Baboul, A. G.; Clifford, S.; Cioslowski, J.; Stefanov, B. B.; Liu, G.; Liashenko, A.; Piskorz, P.; Komaromi, I.; Martin, R. L.; Fox, D. J.; Keith, T.; Al-Laham, M. A.; Peng, C. Y.; Nanayakkara, A.; Challacombe, M.; Gill, P. M. W.; Johnson, B.; Chen, W.; Wong, M. W.; Gonzalez, C.; Pople, J. A. Gaussian, Inc., Wallingford CT, 2004. (b) Gaussian 09, Revision B.01, Frisch, M. J.; Trucks, G. W.; Schlegel, H. B.; Scuseria, G. E.; Robb, M. A.; Cheeseman, J. R.; Scalmani, G.; Barone, V.; Mennucci, B.; Petersson, G. A.; Nakatsuji, H.; Caricato, M.; Li, X.; Hratchian, H. P.; Izmaylov, A. F.; Bloino, J.; Zheng, G.; Sonnenberg, J. L.; Hada, M.; Ehara, M.; Toyota, K.; Fukuda, R.; Hasegawa, J.; Ishida, M.; Nakajima, T.; Honda, Y.; Kitao, O.; Nakai, H.; Vreven, T.; Montgomery, Jr., J. A.; Peralta, J. E.; Ogliaro, F.; Bearpark, M.; Heyd, J. J.;



Brothers, E.; Kudin, K. N.; Staroverov, V. N.; Kobayashi, R.; Normand, J.; Raghavachari, K.; Rendell, A.; Burant, J. C.; Iyengar, S. S.; Tomasi, J.; Cossi, M.; Rega, N.; Millam, N. J.; Klene, M.; Knox, J. E.; Cross, J. B.; Bakken, V.; Adamo, C.; Jaramillo, J.; Gomperts, R.; Stratmann, R. E.; Yazyev, O.; Austin, A. J.; Cammi, R.; Pomelli, C.; Ochterski, J. W.; Martin, R. L.; Morokuma, K.; Zakrzewski, V. G.; Voth, G. A.; Salvador, P.; Dannenberg, J. J.; Dapprich, S.; Daniels, A. D.; Farkas, Ö.; Foresman, J. B.; Ortiz, J. V.; Cioslowski, J.; Fox, D. J. Gaussian, Inc., Wallingford CT, 2009. (c) Gaussian 09, Revision D.01, M. J. Frisch, G. W. Trucks, H. B. Schlegel, G. E. Scuseria, M. A. Robb, J. R. Cheeseman, G. Scalmani, V. Barone, B. Mennucci, G. A. Petersson, H. Nakatsuji, M. Caricato, X. Li, H. P. Hratchian, A. F. Izmaylov, J. Bloino, G. Zheng, J. L. Sonnenberg, M. Hada, M. Ehara, K. Toyota, R. Fukuda, J. Hasegawa, M. Ishida, T. Nakajima, Y. Honda, O. Kitao, H. Nakai, T. Vreven, J. A. Montgomery, Jr., J. E. Peralta, F. Ogliaro, M. Bearpark, J. J. Heyd, E. Brothers, K. N. Kudin, V. N. Staroverov, T. Keith, R. Kobayashi, J. Normand, K. Raghavachari, A. Rendell, J. C. Burant, S. S. Iyengar, J. Tomasi, M. Cossi, N. Rega, J. M. Millam, M. Klene, J. E. Knox, J. B. Cross, V. Bakken, C. Adamo, J. Jaramillo, R. Gomperts, R. E. Stratmann, O. Yazyev, A. J. Austin, R. Cammi, C. Pomelli, J. W. Ochterski, R. L. Martin, K. Morokuma, V. G. Zakrzewski, G. A. Voth, P. Salvador, J. J. Dannenberg, S. Dapprich, A. D. Daniels, O. Farkas, J. B. Foresman, J. V. Ortiz, J. Cioslowski, and D. J. Fox, Gaussian, Inc., Wallingford CT, 2013.

11) (a) Zhao, Y.; Truhlar, D. G. *Theor. Chem. Account* **2008**, *120*, 215-241. (b) Karton, A.; Tarnopolsky, A.; Lamere, J.-F.; Schatz, G. C.; Martin, J. M. L. *J. Phys. Chem. A* **2008**, *112*, 12868-12886. (c) Zhao, Y.; Truhlar, D. G. *J. Chem. Phys.* **2006**, *125*, 194101-194118. (d) Zhao, Y.; Truhlar, D. G. *J. Phys. Chem. A* **2006**, *110*, 13126-13130.

12) (a) Hay, P. J.; Wadt, W. R. *J. Chem. Phys.* **1985**, *82*, 270-283. (b) Yang, Y.; Weaver, M. N.; Merz Jr., K. M. *J. Phys. Chem. A* **2009**, *113*, 9843-9851. (c) Su, M.-D.; Chu, S.-Y. *J. Am. Chem. Soc.* **1997**, *119*, 10178-10185. (d) Vigalok, A.; Uzan, O.; Shimon, J. W.; Ben-David, Y.; Martin, J. M. L.; Milstein, D. *J. Am. Chem. Soc.* **1998**, *120*, 12539-12544. (e) Kadyrov, R.; Börner, A.; Selke, R. *Eur. J. Inorg. Chem.* **1999**, 705-711. (f) Su, M.-D.; Chu, S.-Y. *Chem. Eur. J.* **1999**, *5*, 198-207. (g) Yu, Z.-X.; Wender, P. A.; Houk, K. N. *J. Am. Chem. Soc.* **2004**, *126*, 9154-9155. h) Luo, X.; Tang, D.; Li, M. *THEOCHEM* **2005**, *714*, 61-72. (i) Luo, X.; Tang, D.; Li, M. *Int. J. Quantum Chem.* **2005**, *105*, 108-123. (j) Ardura, D.; López, R.; Sordo, T. L. *J. Org. Chem.* **2006**, *71*, 7315-7321. (k) Alagona, G.; Chio, C.; Rocchiccioli, S. *J. Mol. Model.* **2007**, *13*, 823-837. (l) Yu, Z.-X.; Cheong, P. H.-Y.; Liu, P.; Legault, C. Y.; Wender, P. A.; Houk, K. N. *J. Am. Chem. Soc.* **2008**, *130*, 2378-2379. (m) Siebert, M. R.; Yudin, A. K.; Tantillo, D. J. *Eur. J. Org. Chem.* **2011**, *3*, 553-561.

13) (a) Hay, P. J.; Wadt, W. R. *J. Chem. Phys.* **1985**, *82*, 270. (b) Hay, P. J.; Wadt, W. R. *J. Chem. Phys.* **1985**, *82*, 284. (c) Hay, P. J.; Wadt, W. R. *J. Chem. Phys.* **1985**, *82*, 299.

14) Marenich, A. V.; Cramer, C. J.; Truhlar, D. G. *J. Phys. Chem. B.* **2009**, *113*, 6378-6396.

- 15) (a) Gonzalez, C. S.; Schlegel, H. B. *J. Phys. Chem.* **1990**, *94*, 5523. (b) Fukui, K. *Acc. Chem. Res.* **1981**, *14*, 363-368.
- 16) Hay, P. J.; Wadt, W. R. *J. Chem. Phys.* **1985**, *82*, 270-283
- 17) (a) Mustard, T. J. L.; Mack, D. J.; Njardarson, J. T.; Cheong, P. H.-Y. *J. Am. Chem. Soc.* **2013**, *135*, 1471-1475. (b) Schäfer, A.; Horn, H.; Ahlrichs, R. *J. Chem. Phys.* **1992**, *97*, 2571-2577.
18. Grimme, S.; Antony, J.; Ehrlich S.; Krieg, H. *J. Chem. Phys.* **2010**, *132*, 154104.
19. (a) Zhao, Y.; Truhlar, D. G. *Theor. Chem. Acc.* **2008**, *120*, 215-241. (b) Zhao, Y.; Truhlar, D. G. *Acc. Chem. Res.* **2008**, *41*, 157-167.
20. Chai, J.-D.; Head-Gordon, M. *Phys. Chem. Chem. Phys.*, **2008**, *10*, 6615-6620.
21. Legault, C. Y.; Universite de Sherbrooke: CYLview 1.0b, (<http://www.cylview.org>), **2009**.

# X. NMR Spectra

## 2-bromo- $\beta,\beta$ -dideuterostyrene

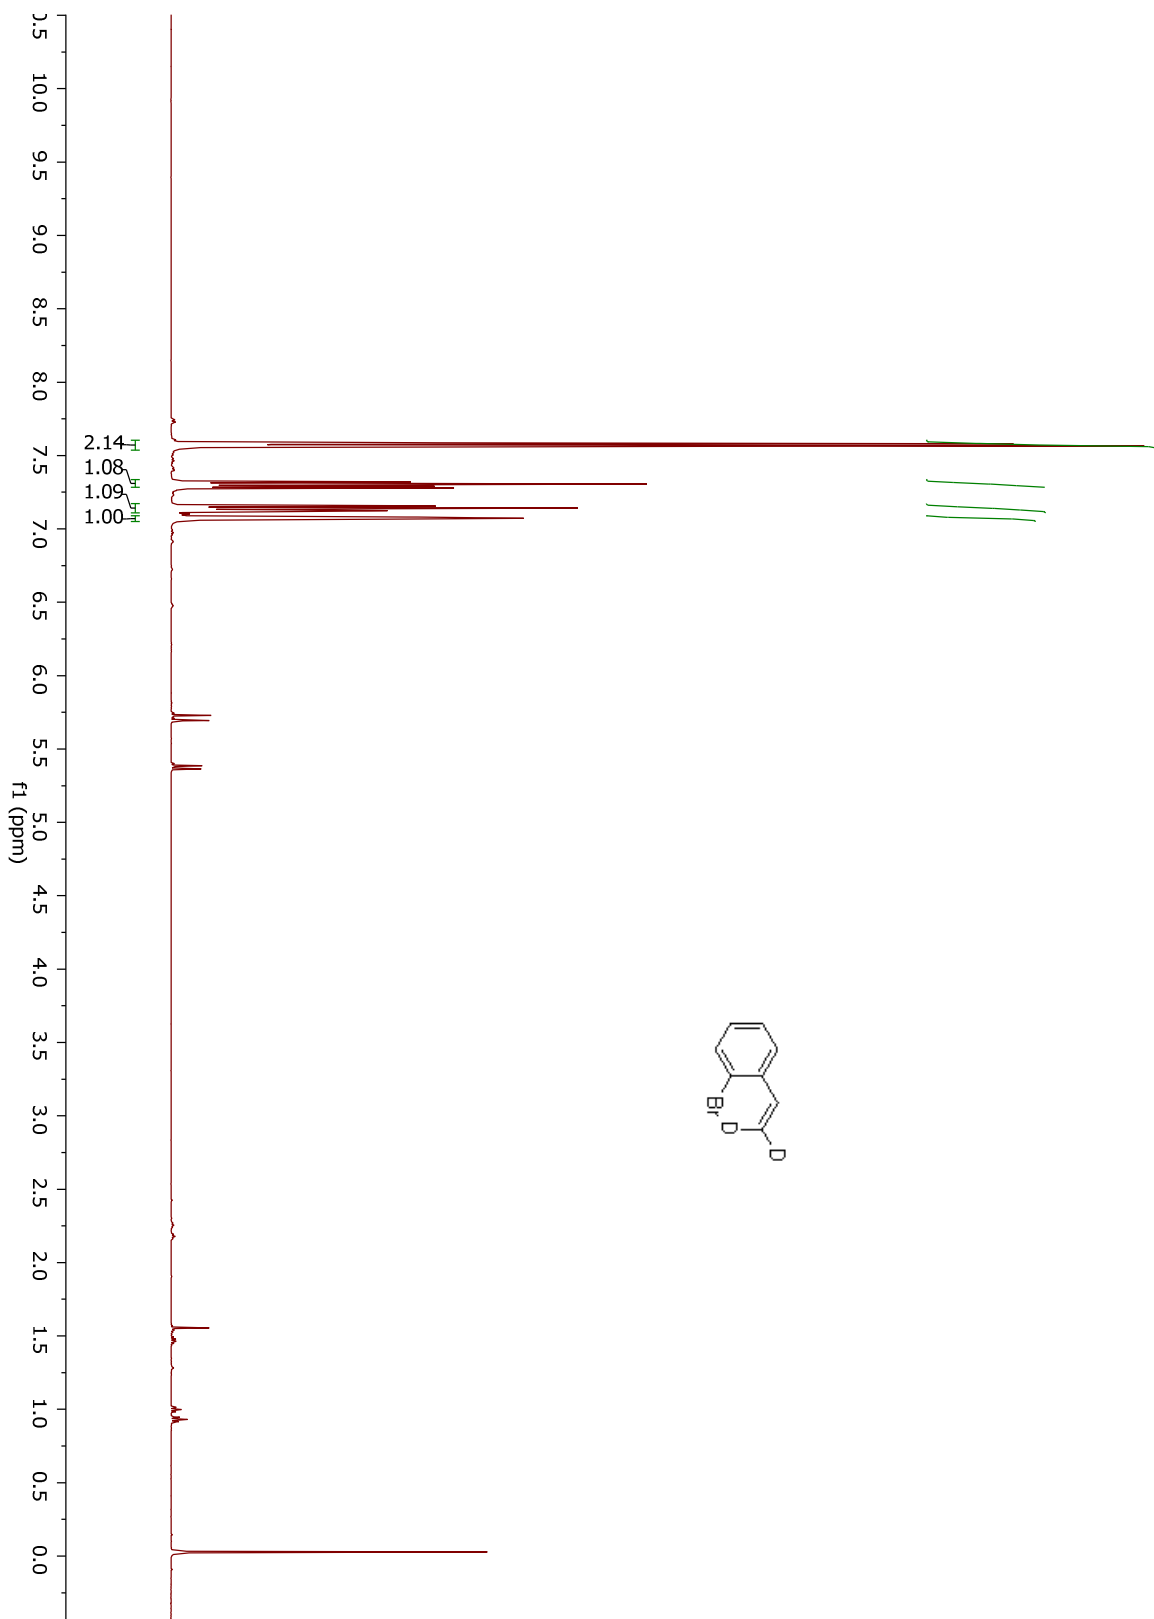

# 2-bromo- $\beta,\beta$ -dideuterostyrene

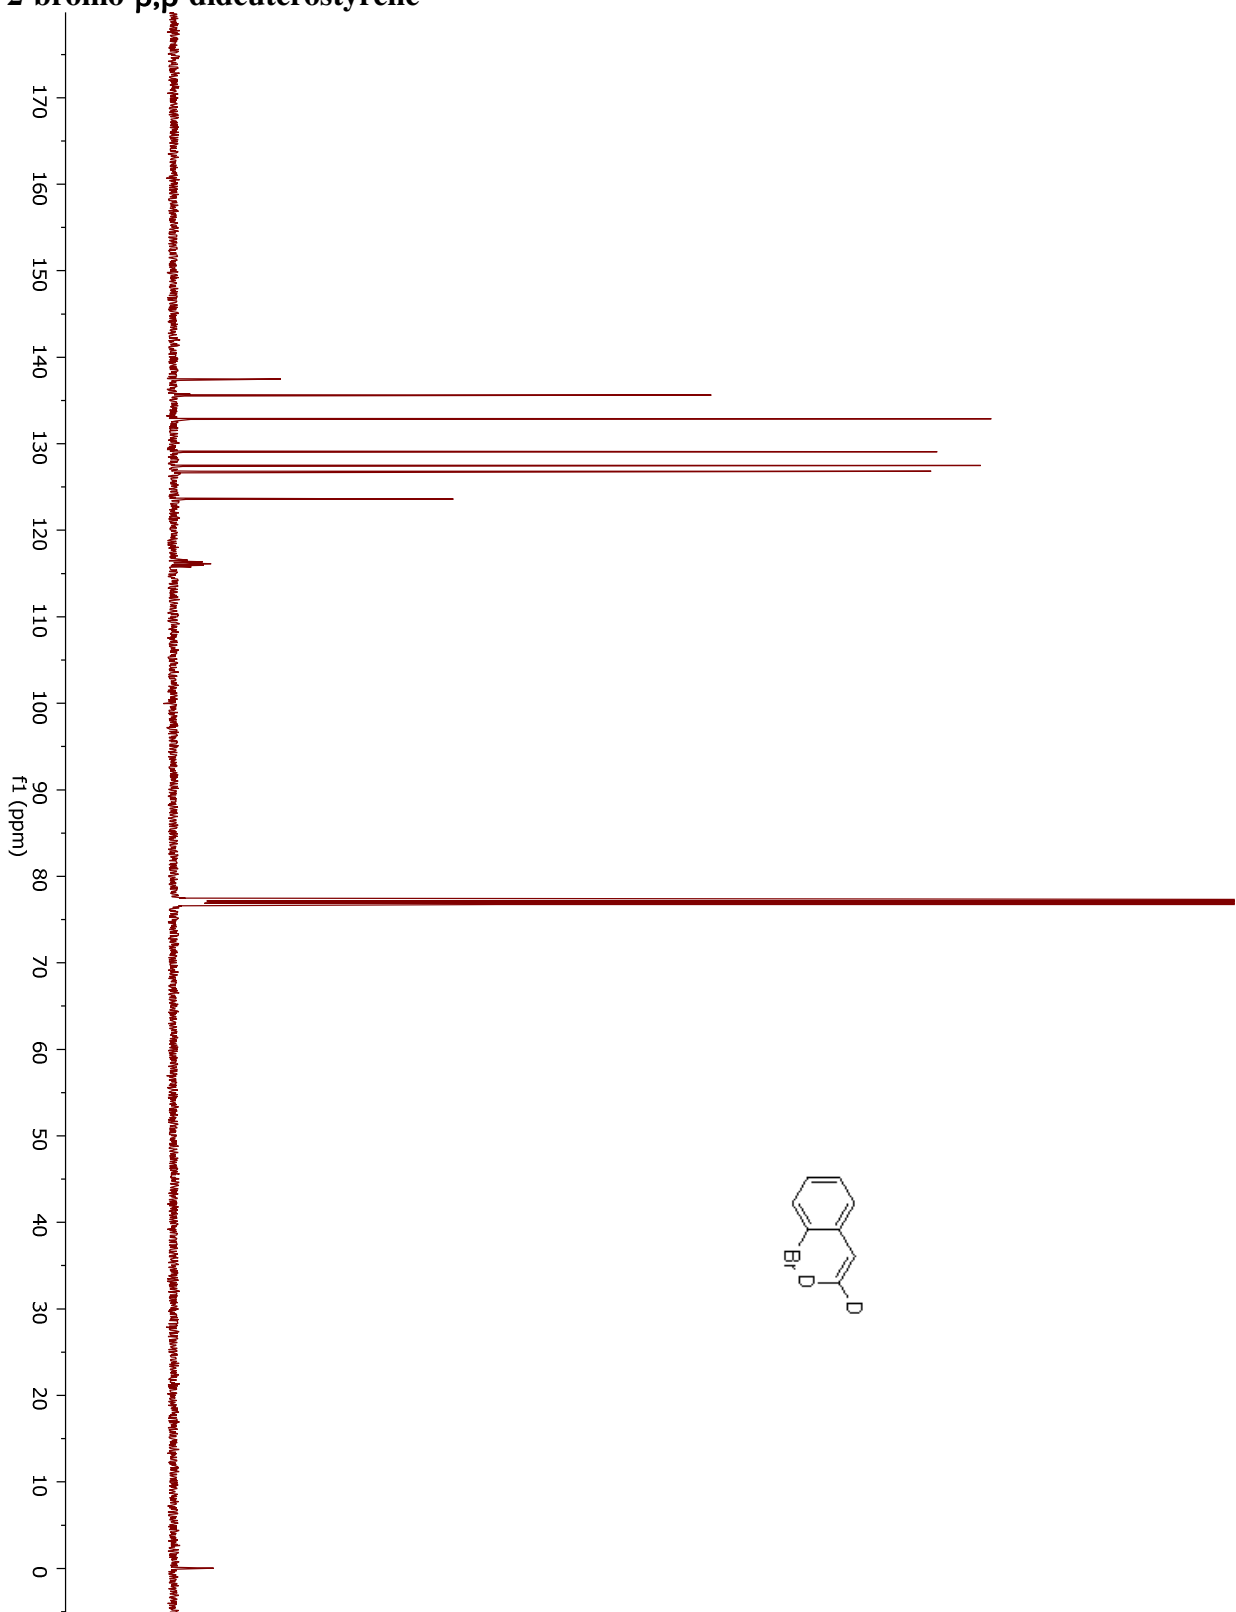

# 2-bromo-5-trifluoromethylstyrene

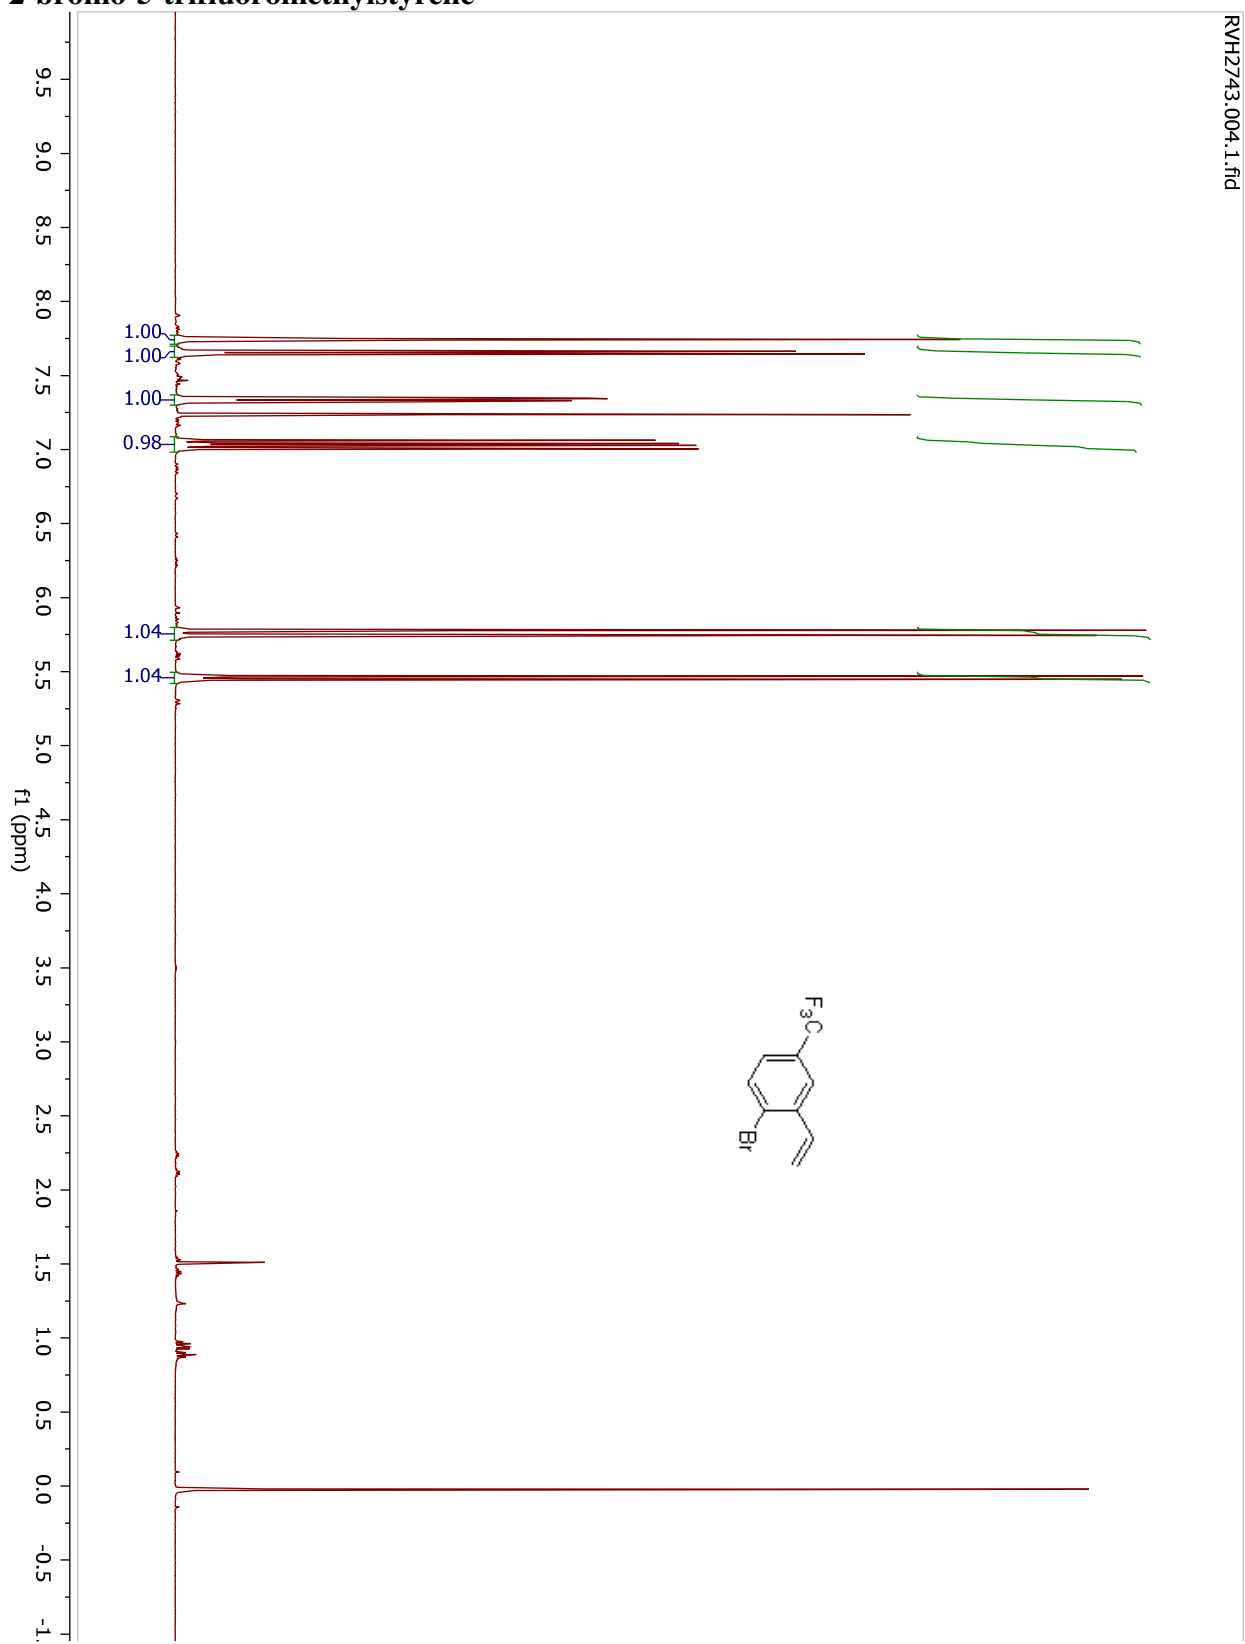

## 2-bromo-5-trifluoromethylstyrene

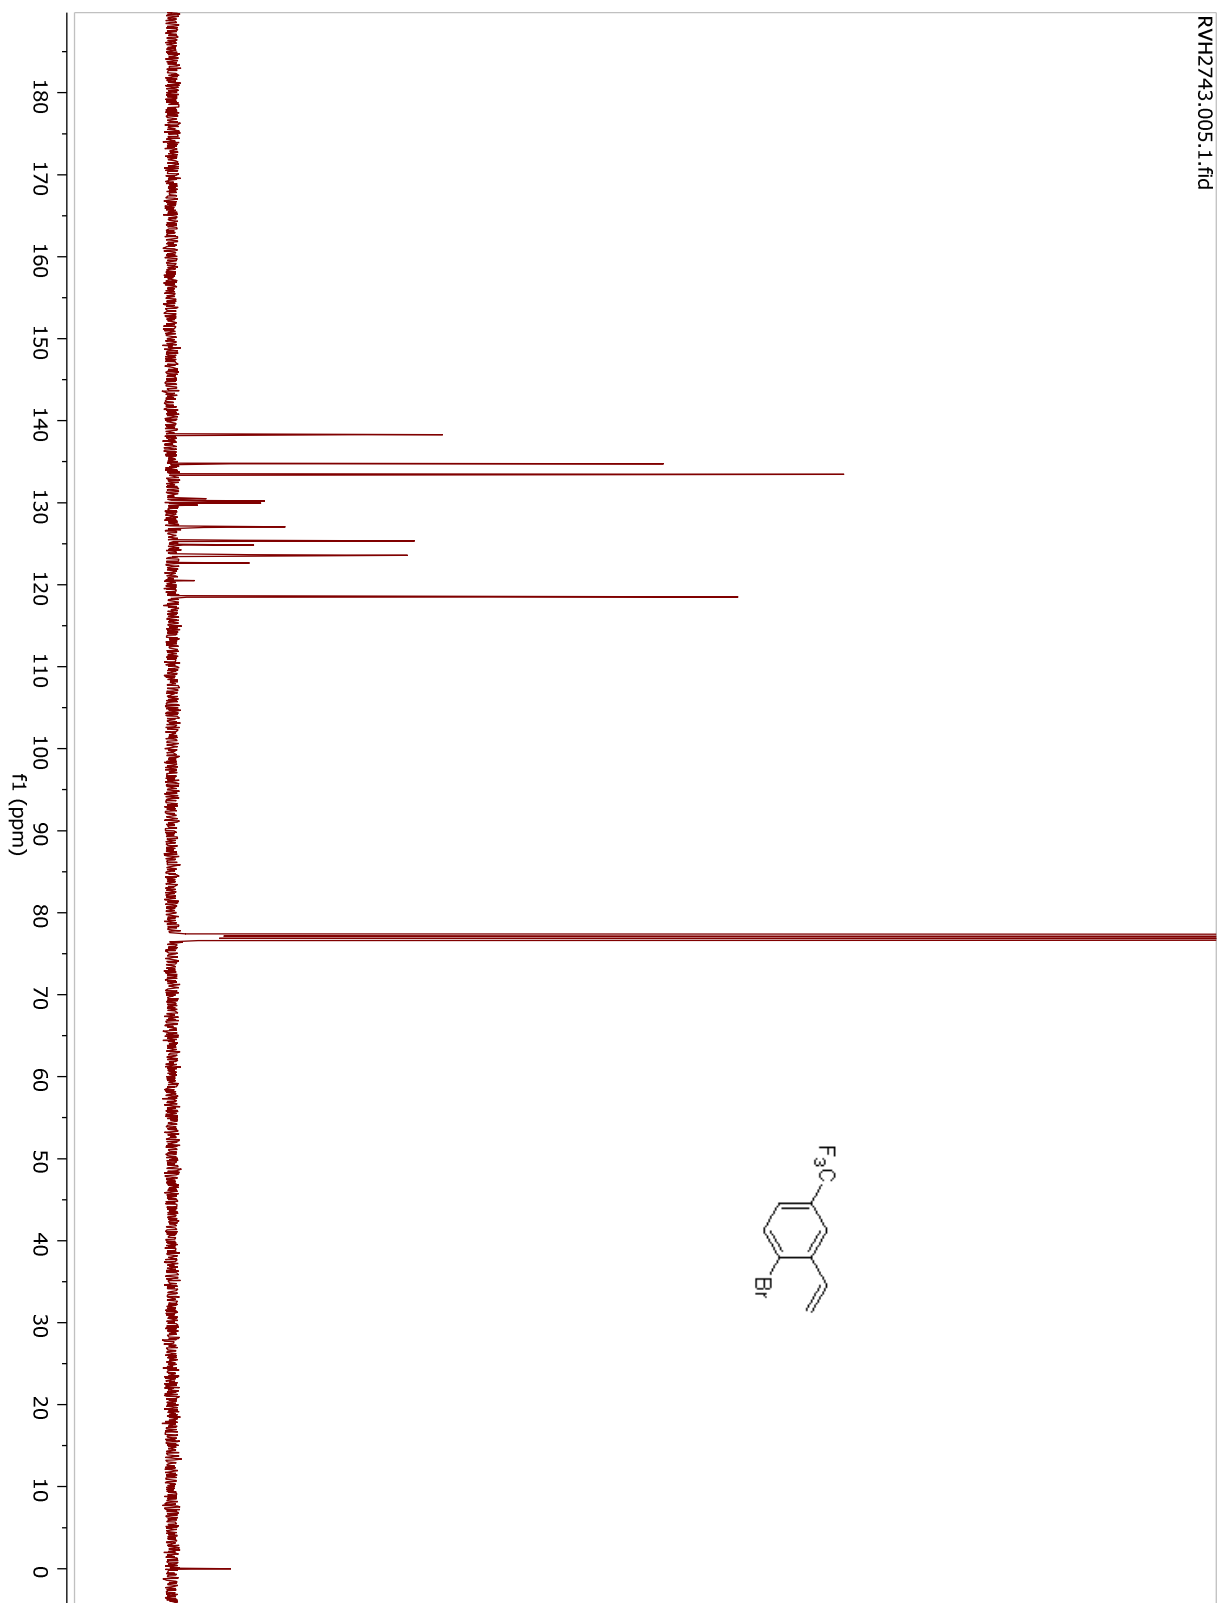

# 2-bromo-3,5-dimethoxystyrene.

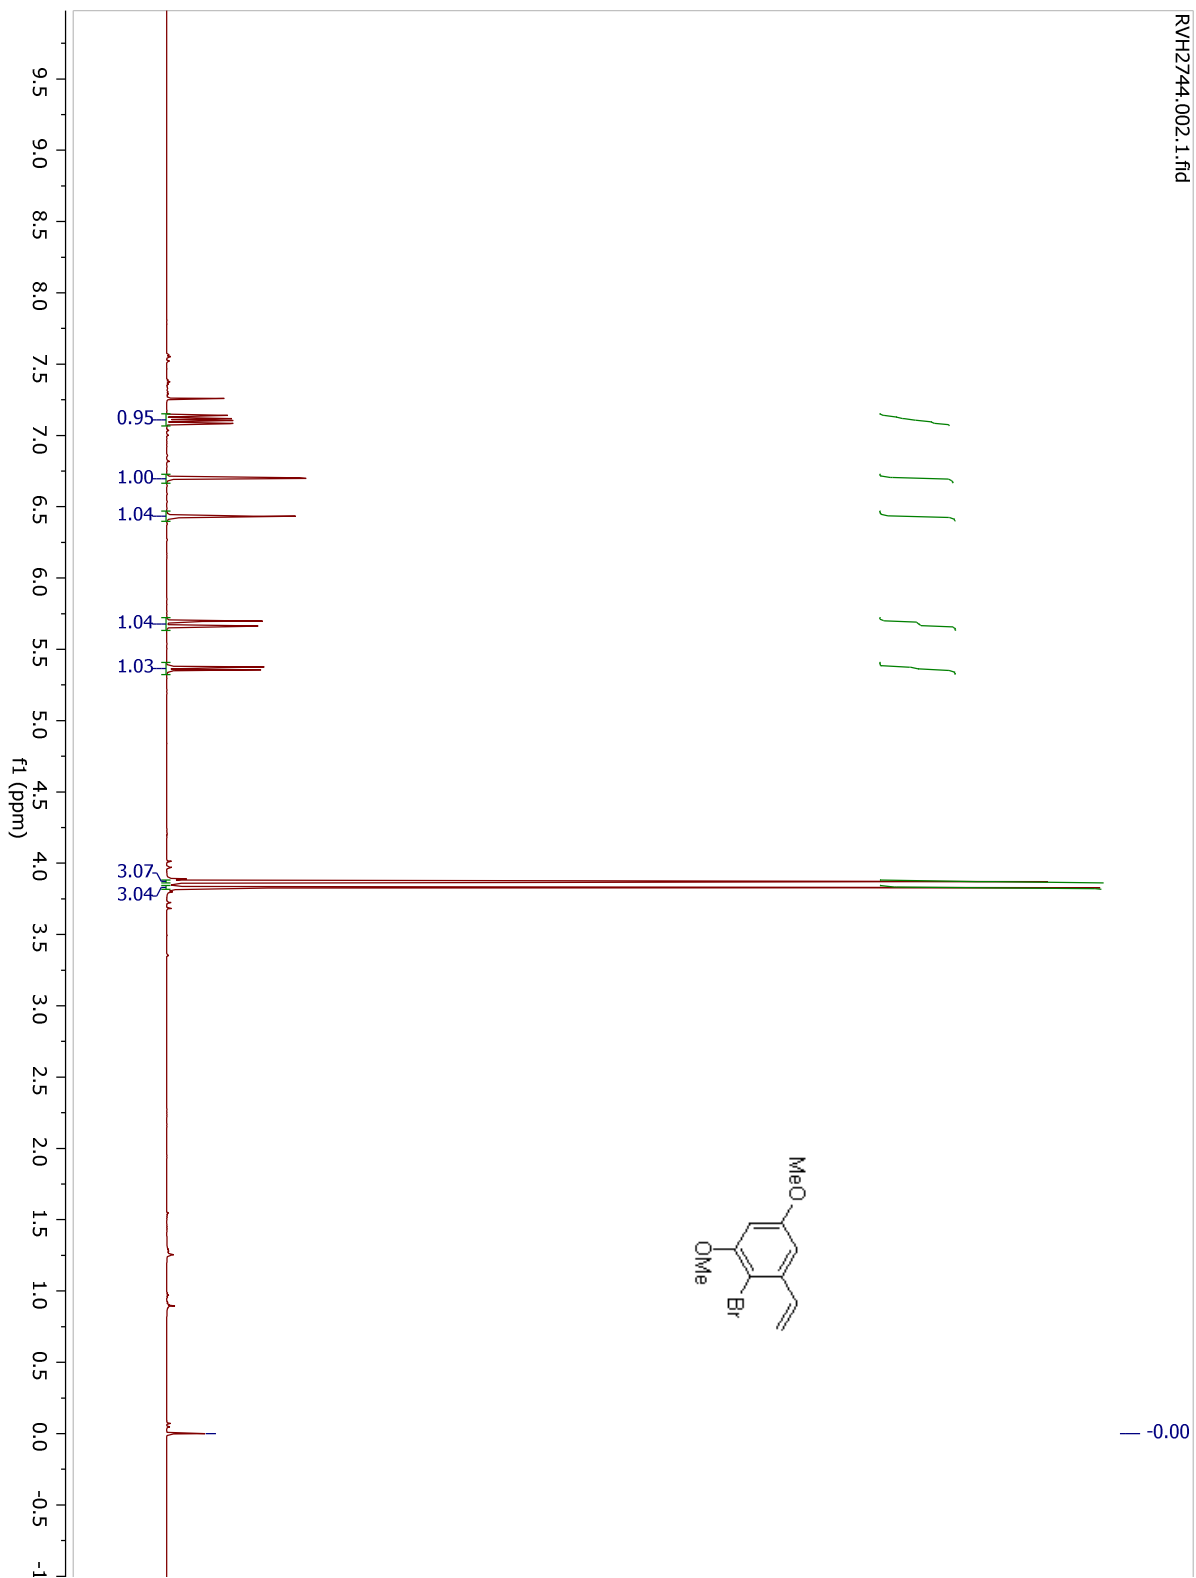

# 2-bromo-3,5-dimethoxystyrene.

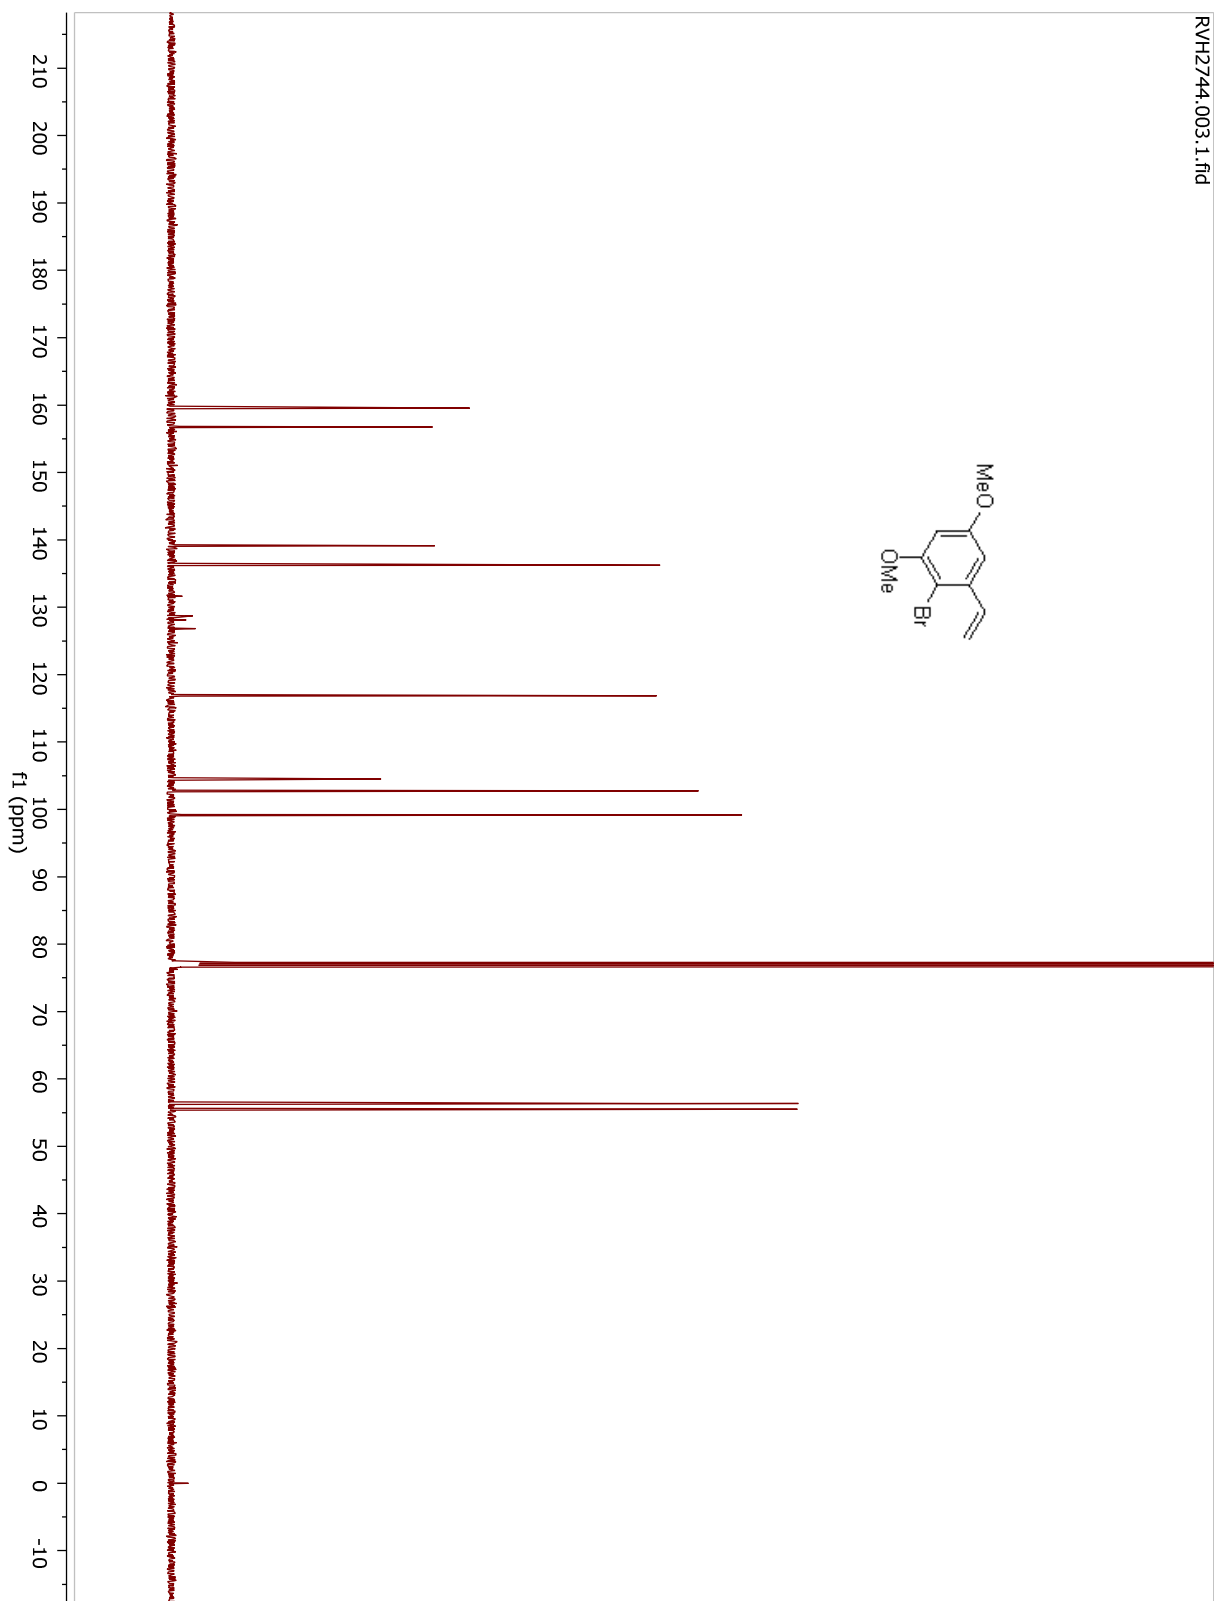



**5-bromo(3-D)-1,2-dihydronaphthalene**

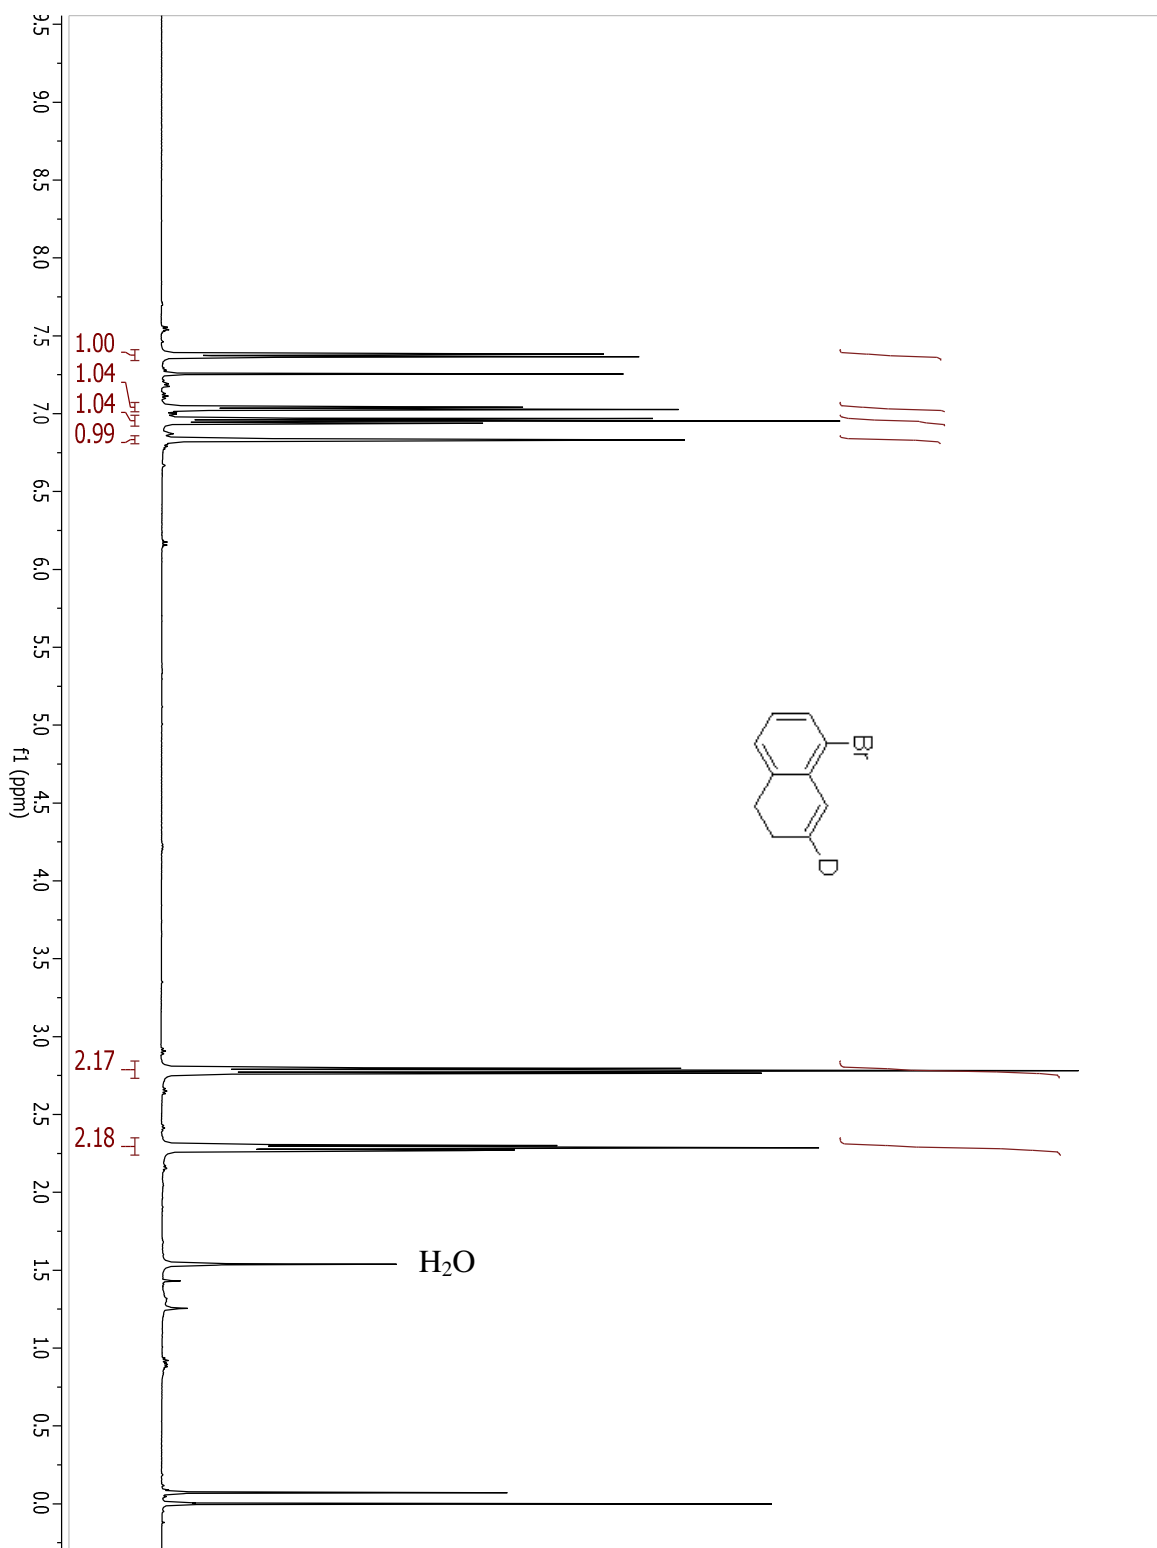

# 5-bromo(3-D)-1,2-dihydronaphthalene

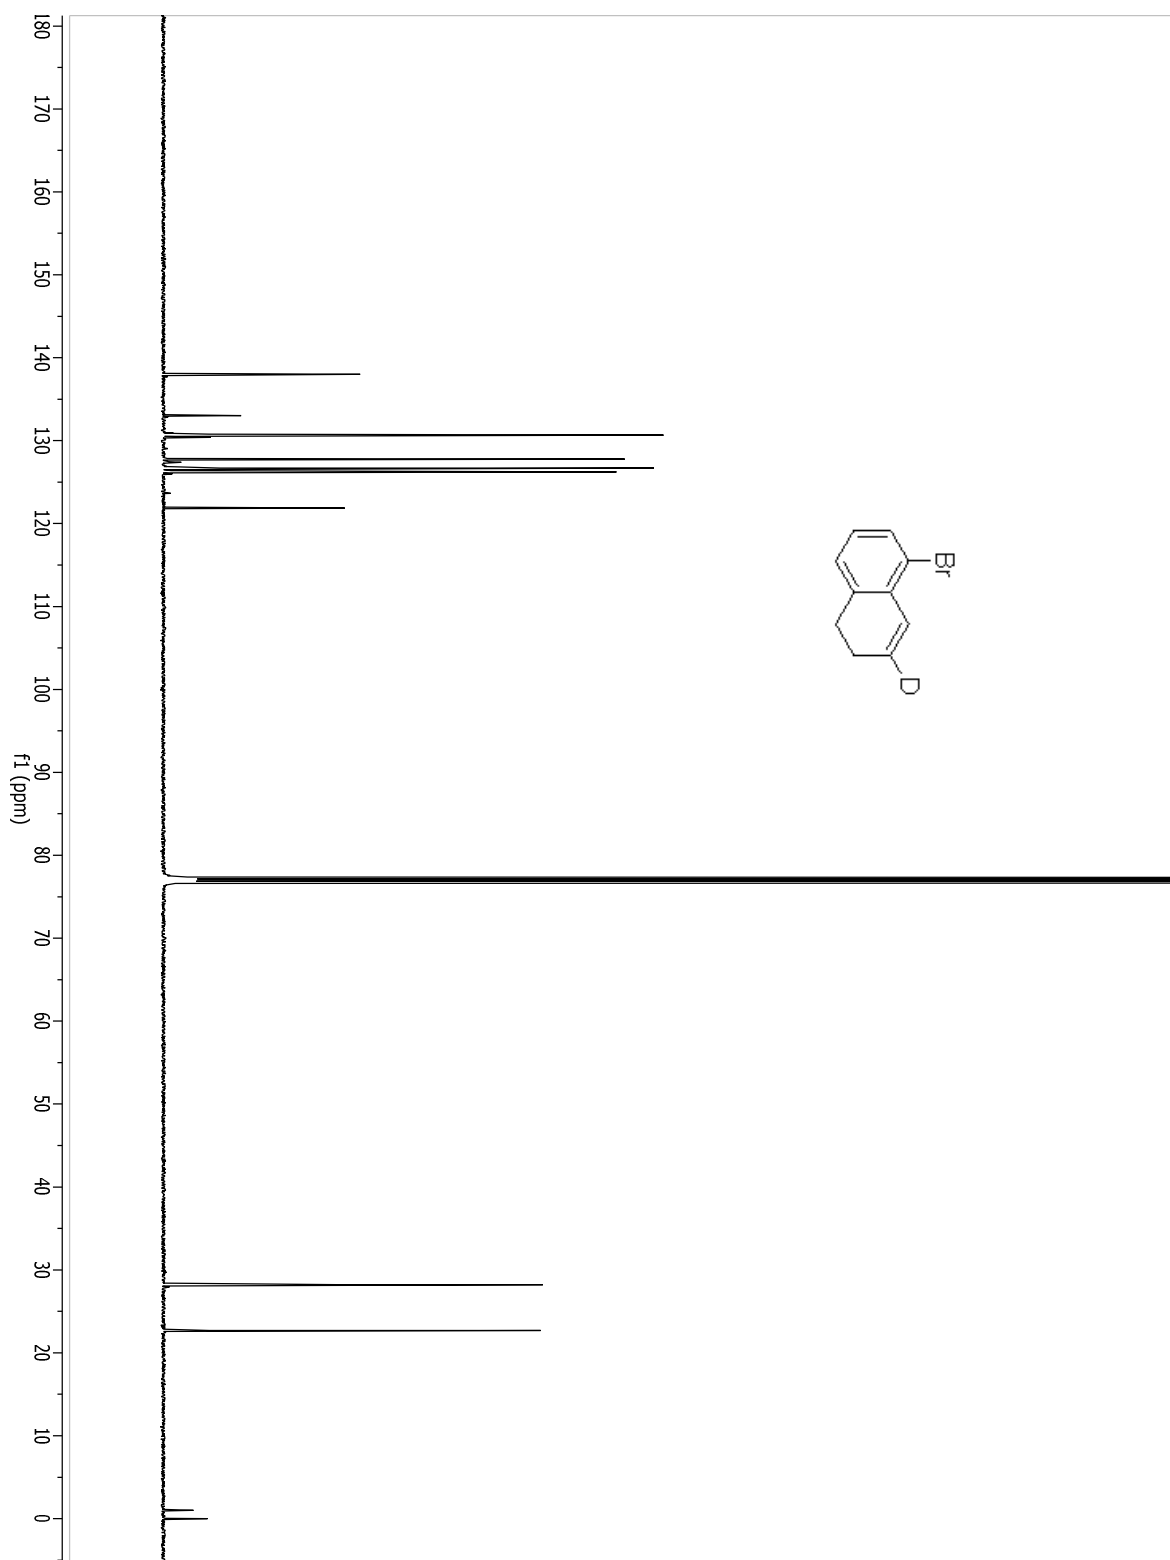

2-[2-(1-bromo-2-dideutero-ethyl)phenyl]-4,4,5,5-tetramethyl-1,3,2-dioxaborolane

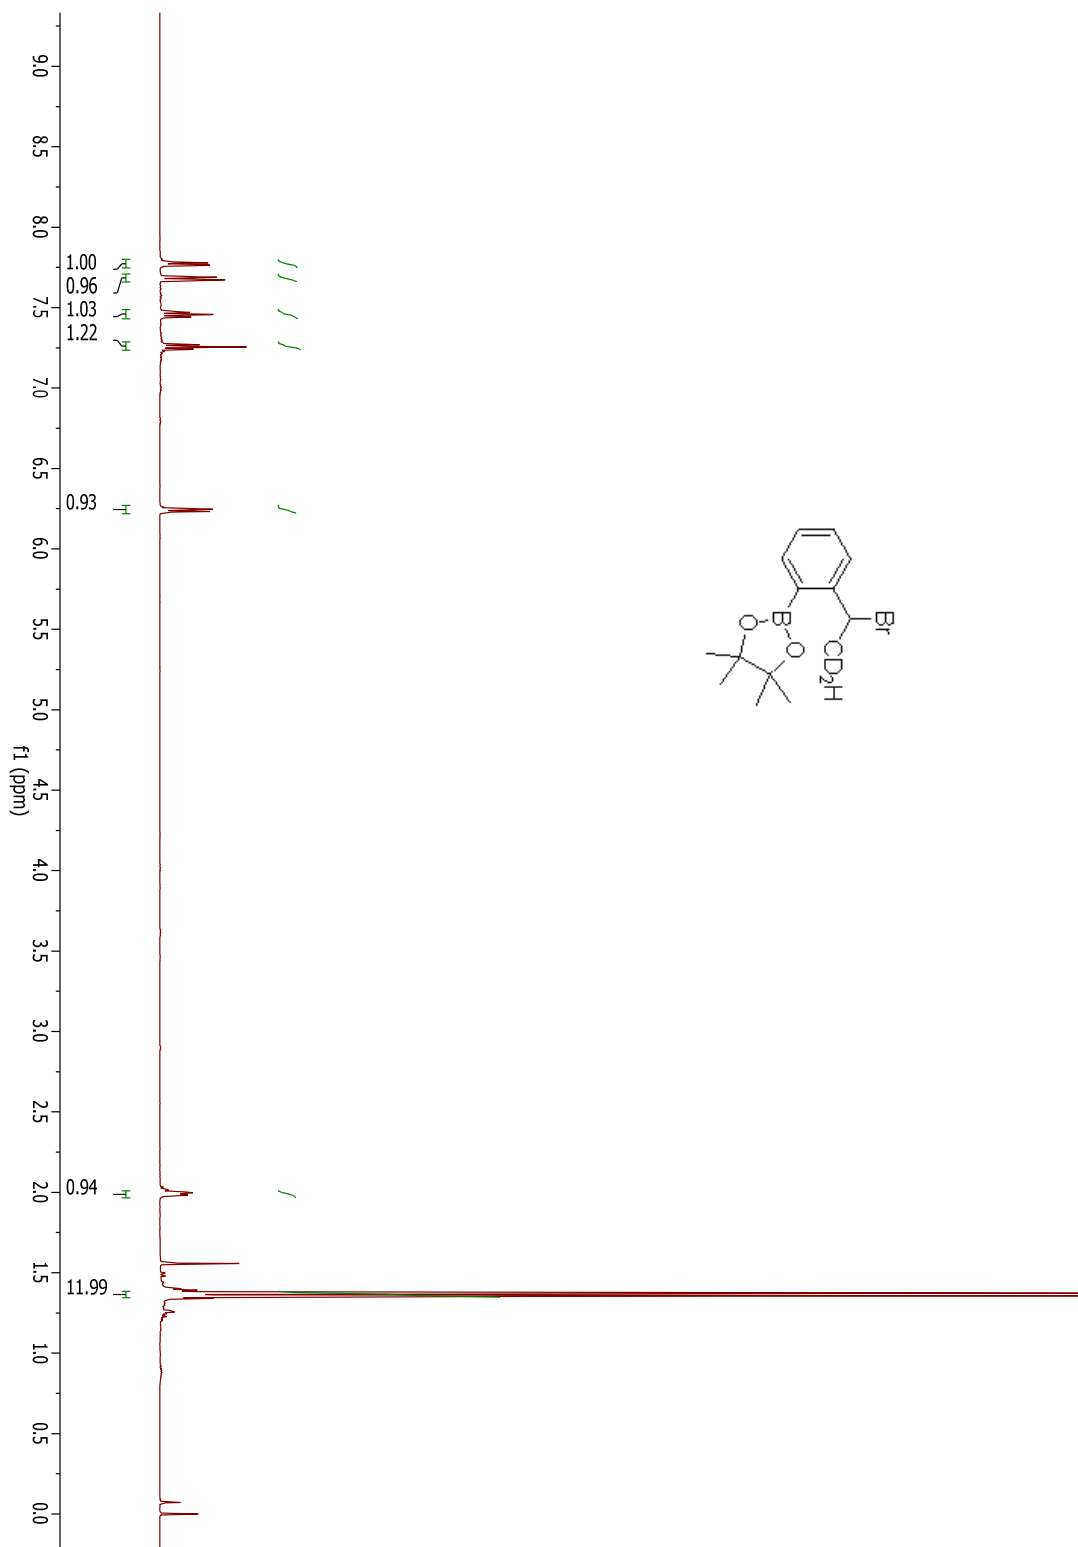

2-[2-(1-bromo-2-dideutero-ethyl)phenyl]-4,4,5,5-tetramethyl-1,3,2-dioxaborolane

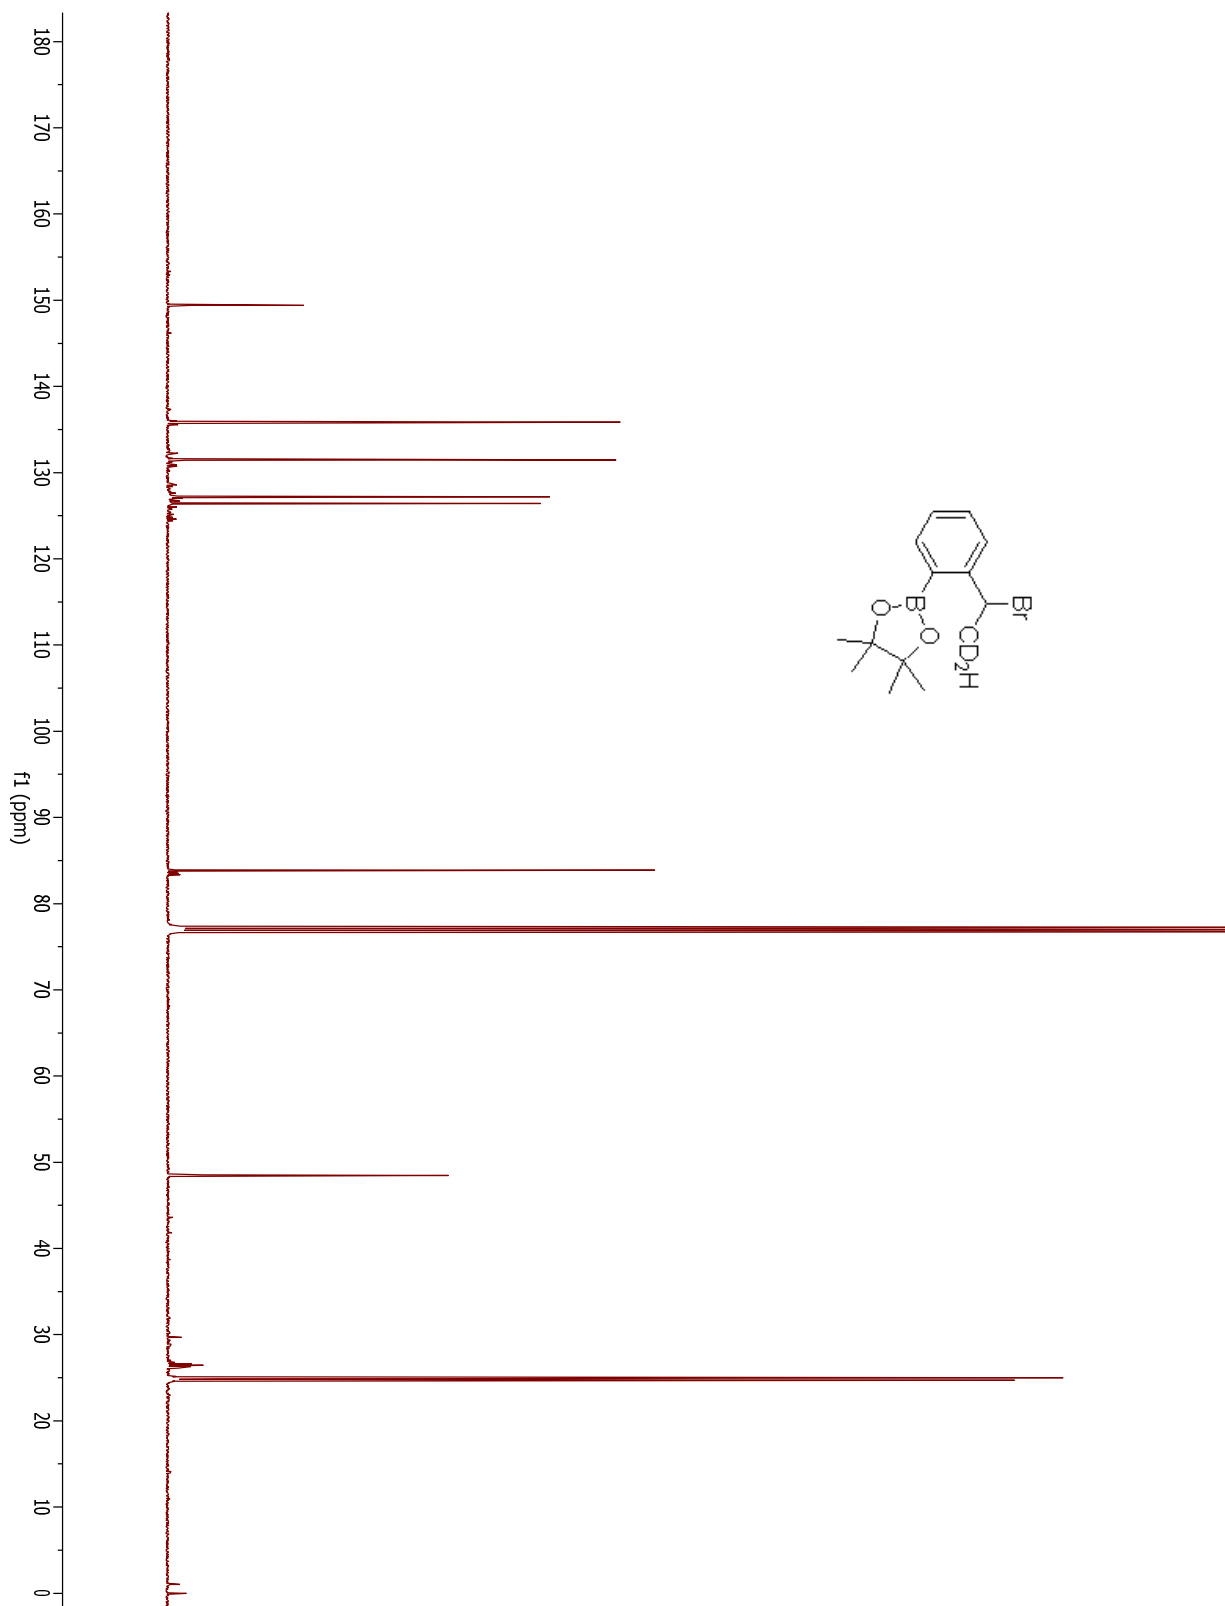

**2-[2-(1-bromoethyl)-4-trifluoromethylphenyl]-4,4,5,5-tetramethyl-1,3,2-dioxaborolane**

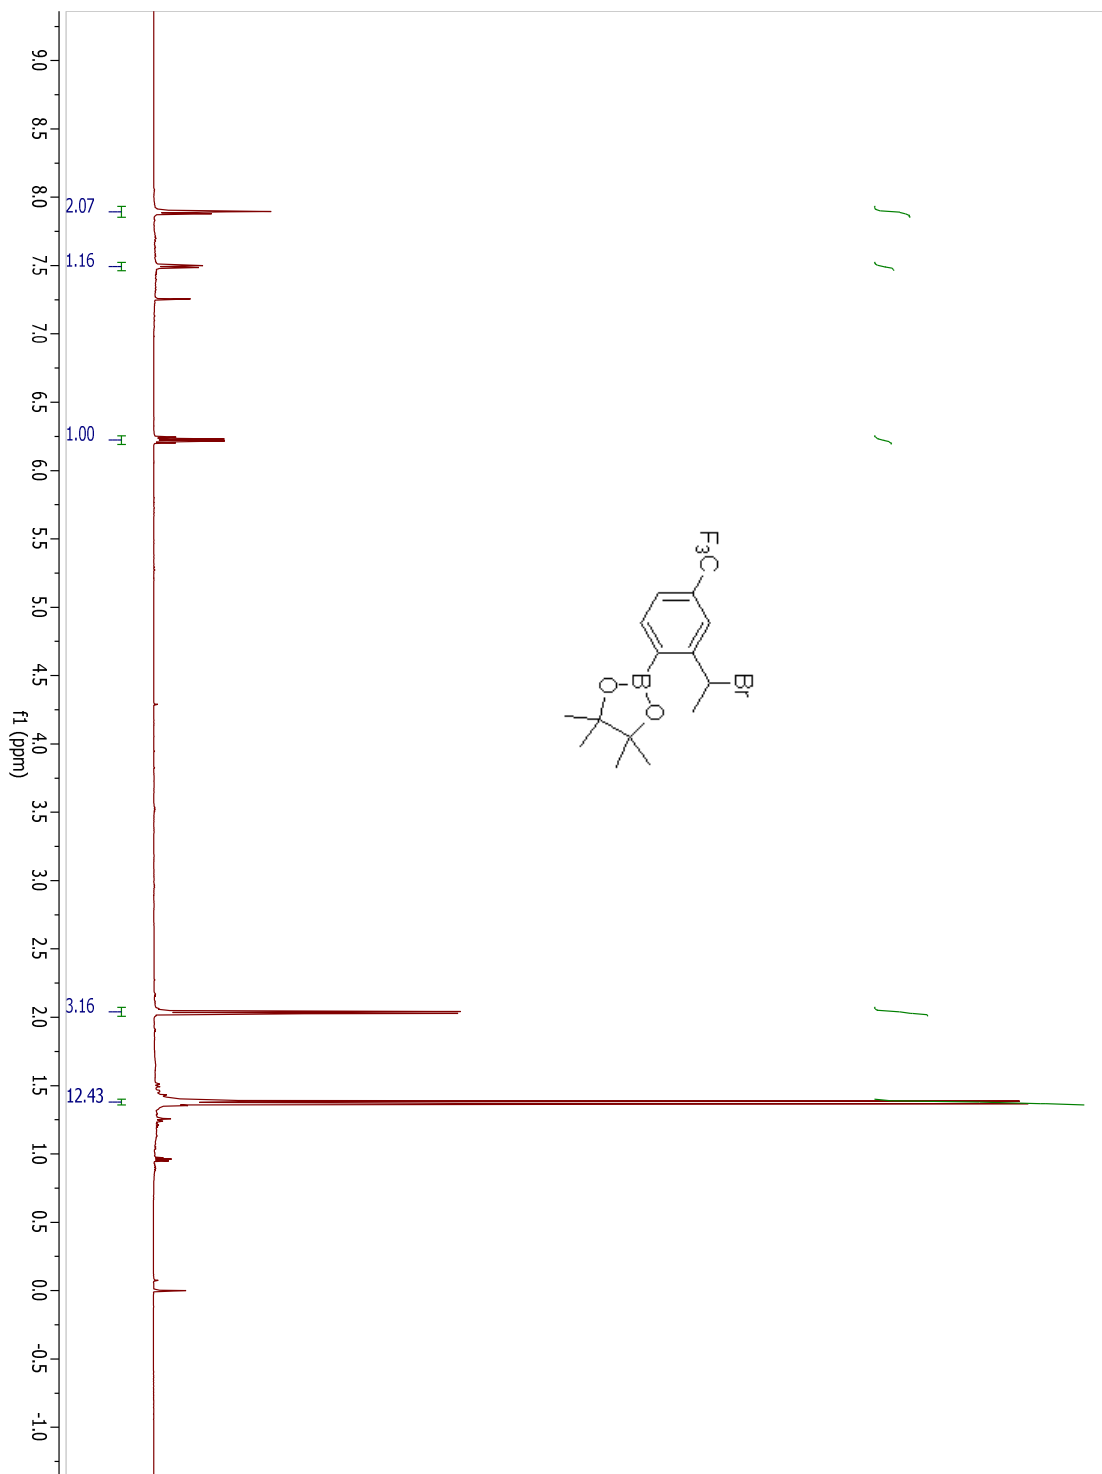

**2-[2-(1-bromoethyl)-4-trifluoromethylphenyl]-4,4,5,5-tetramethyl-1,3,2-dioxaborolane**

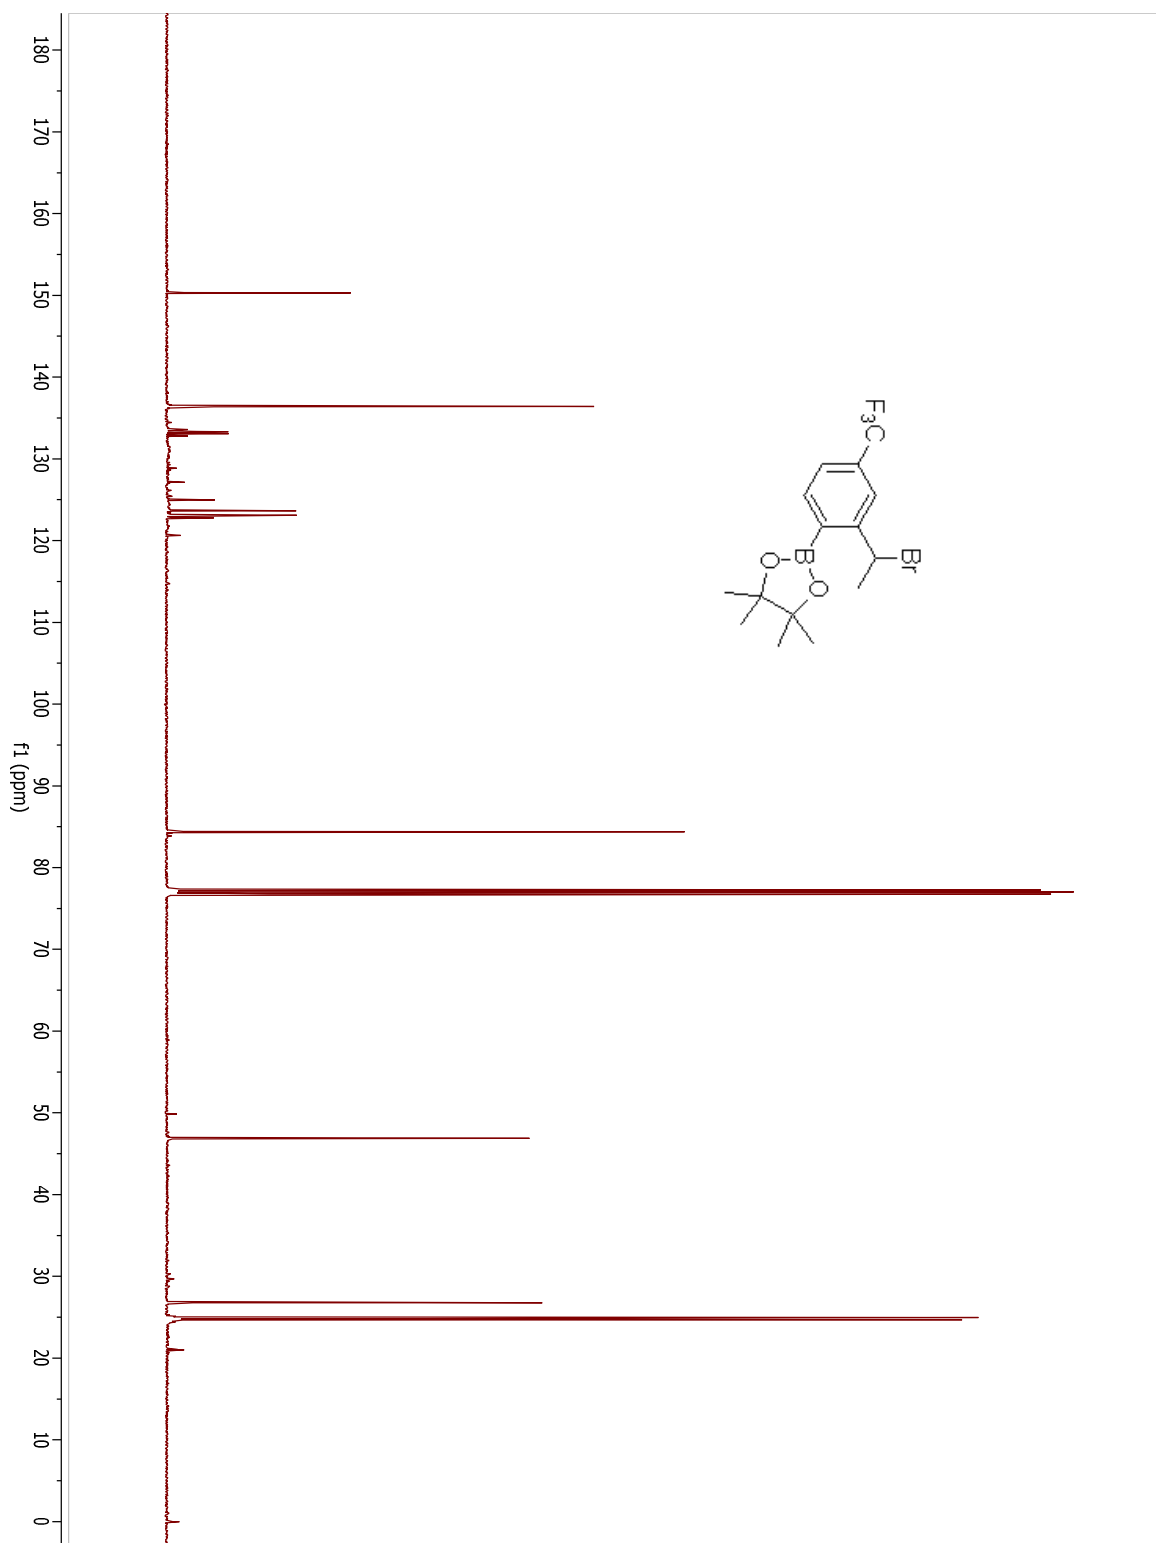

**2-[1-(2-bromo-5-trifluoromethylphenyl)ethyl]-4,4,5,5-tetramethyl-1,3,2-dioxaborolane.**

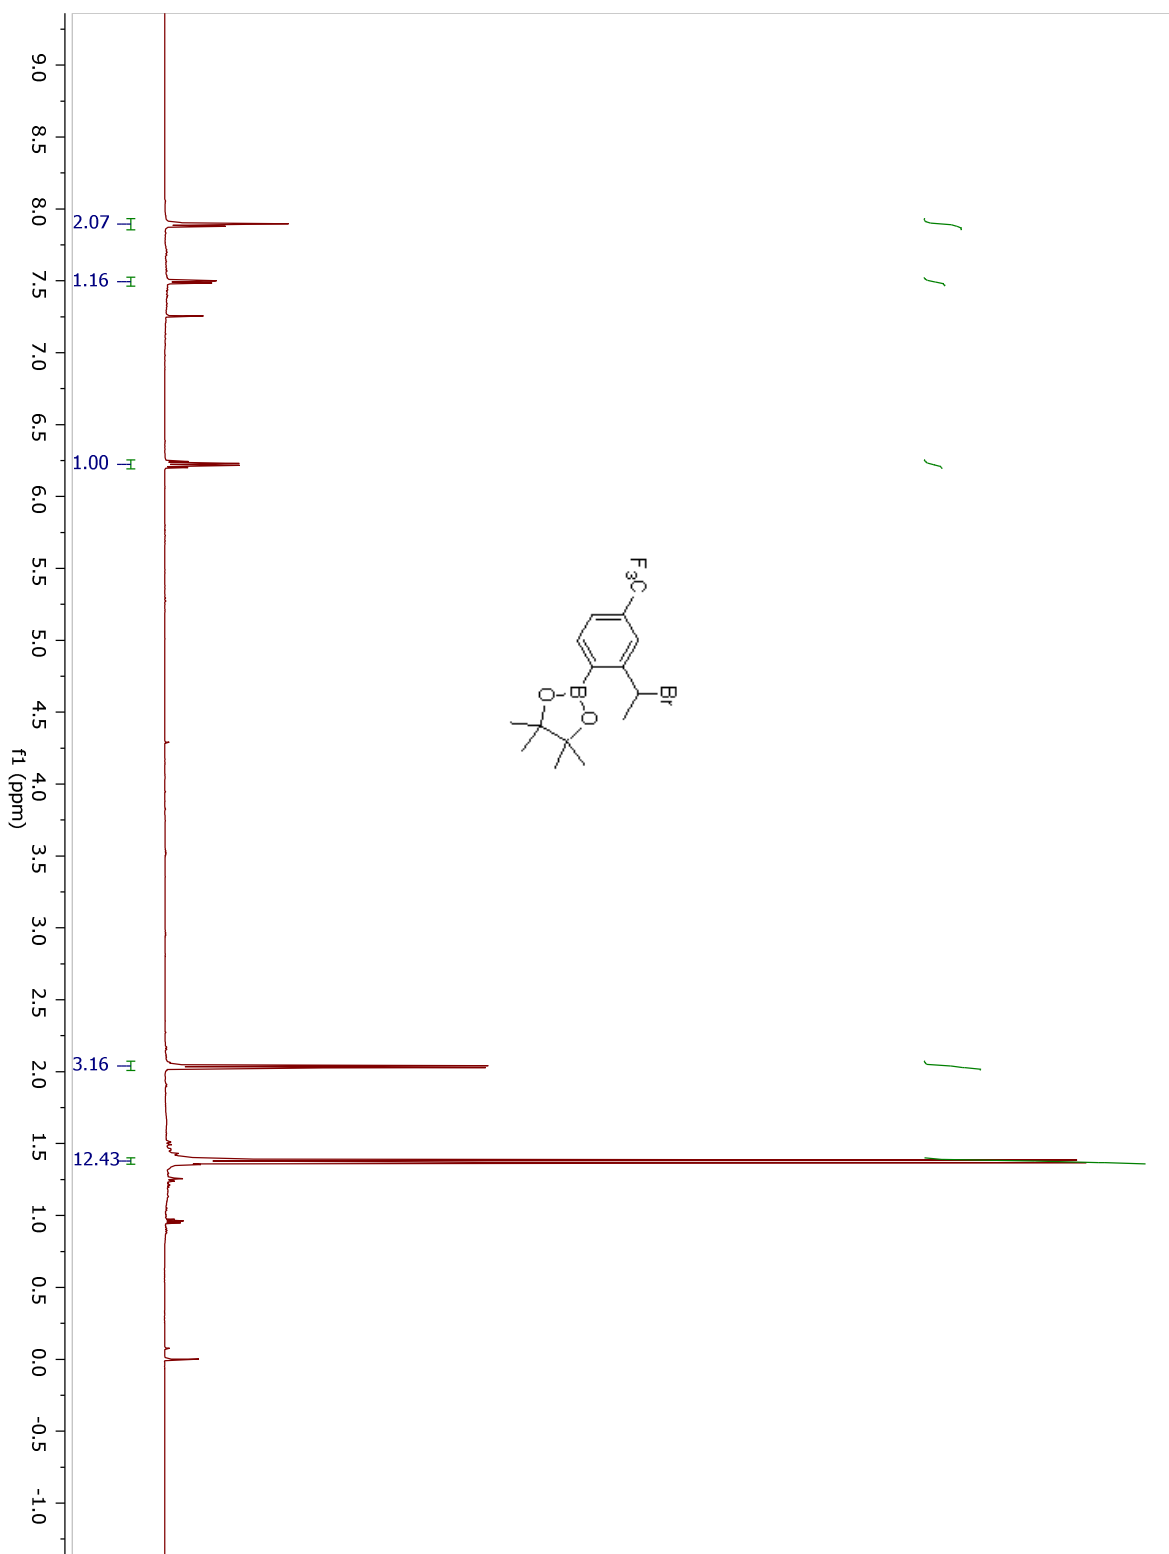

**2-[1-(2-bromo-5-trifluoromethylphenyl)ethyl]-4,4,5,5-tetramethyl-1,3,2-dioxaborolane.**

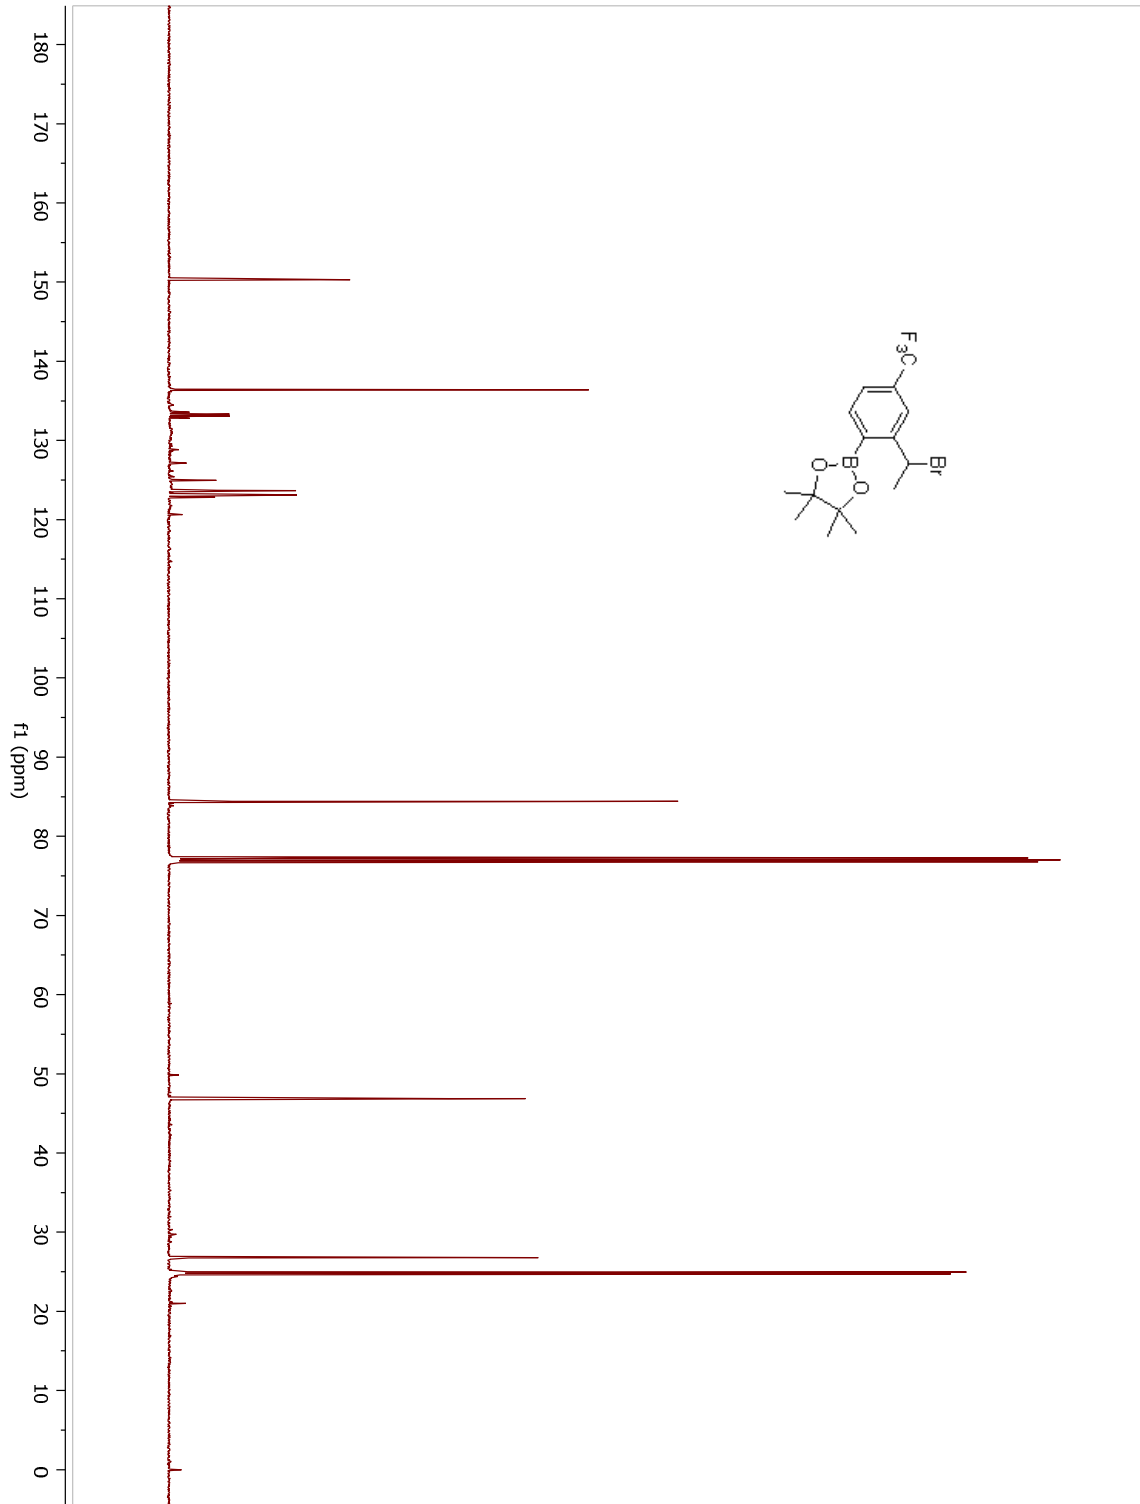



2-[2-(1-bromoethyl)-4,6-dimethoxyphenyl]-4,4,5,5-tetramethyl-1,3,2-dioxaborolane.

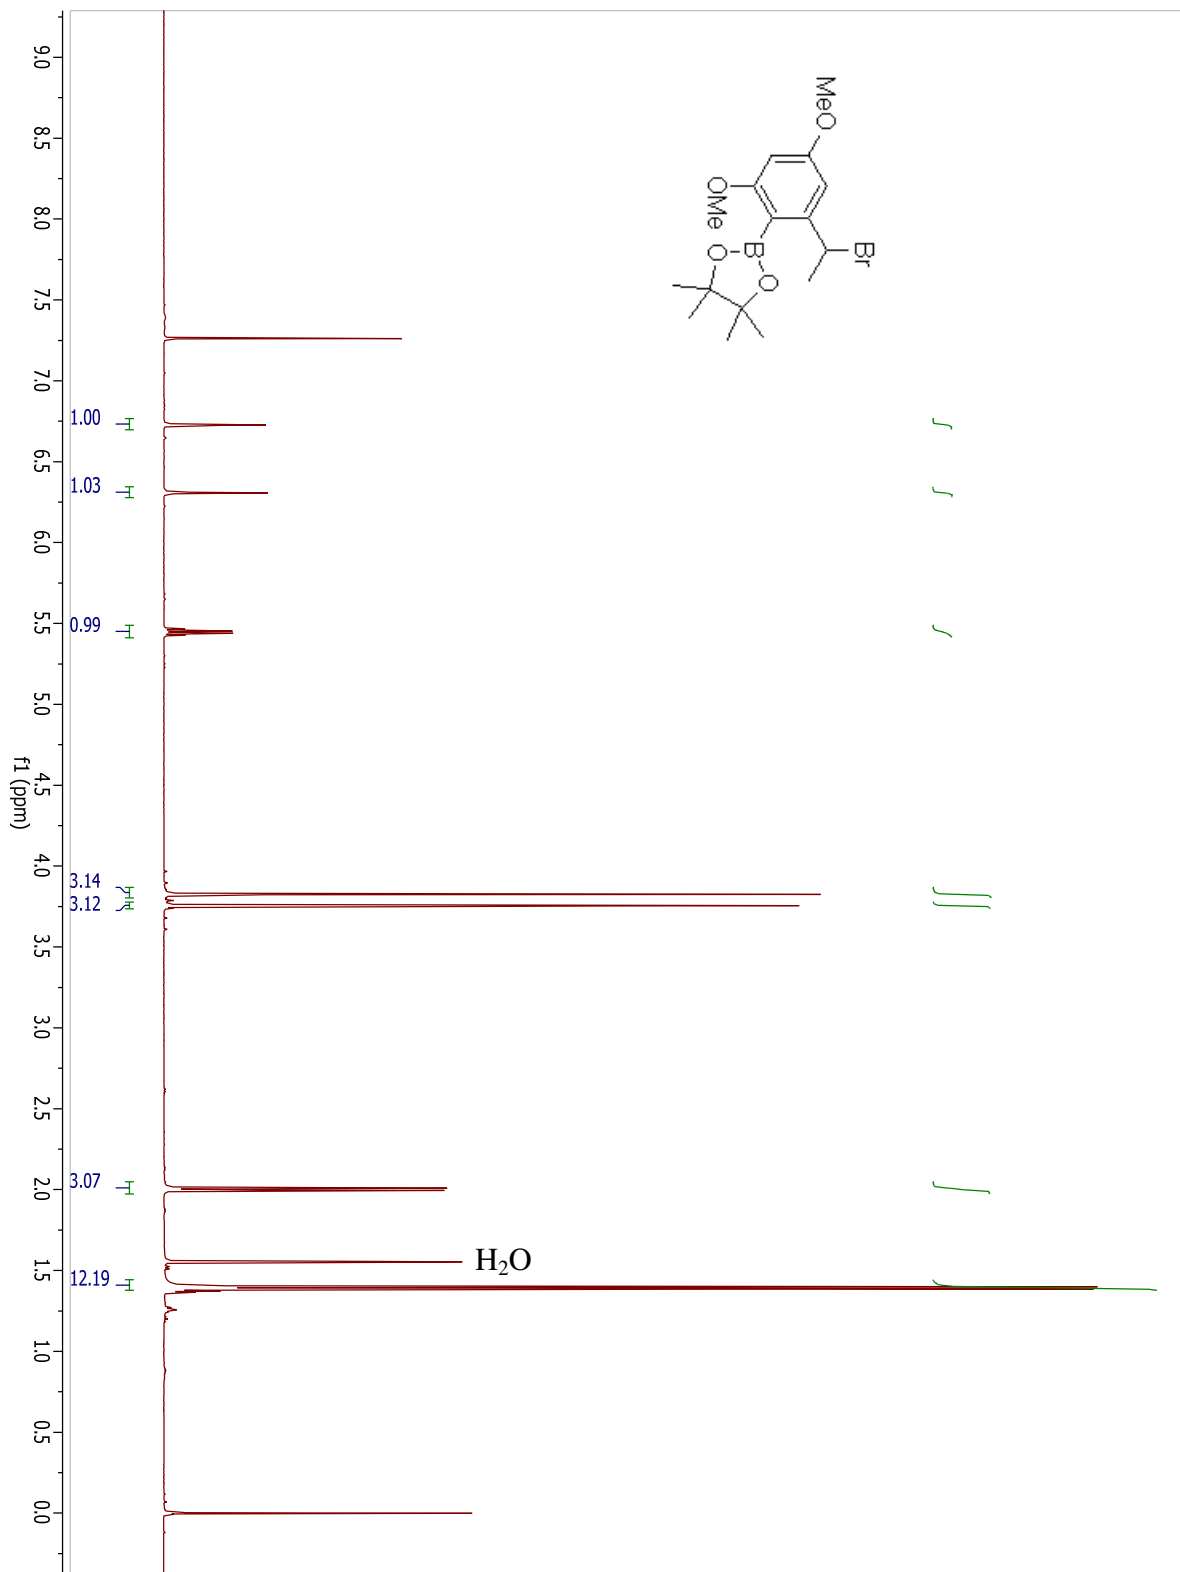

2-[2-(1-bromoethyl)-4,6-dimethoxyphenyl]-4,4,5,5-tetramethyl-1,3,2-dioxaborolane.

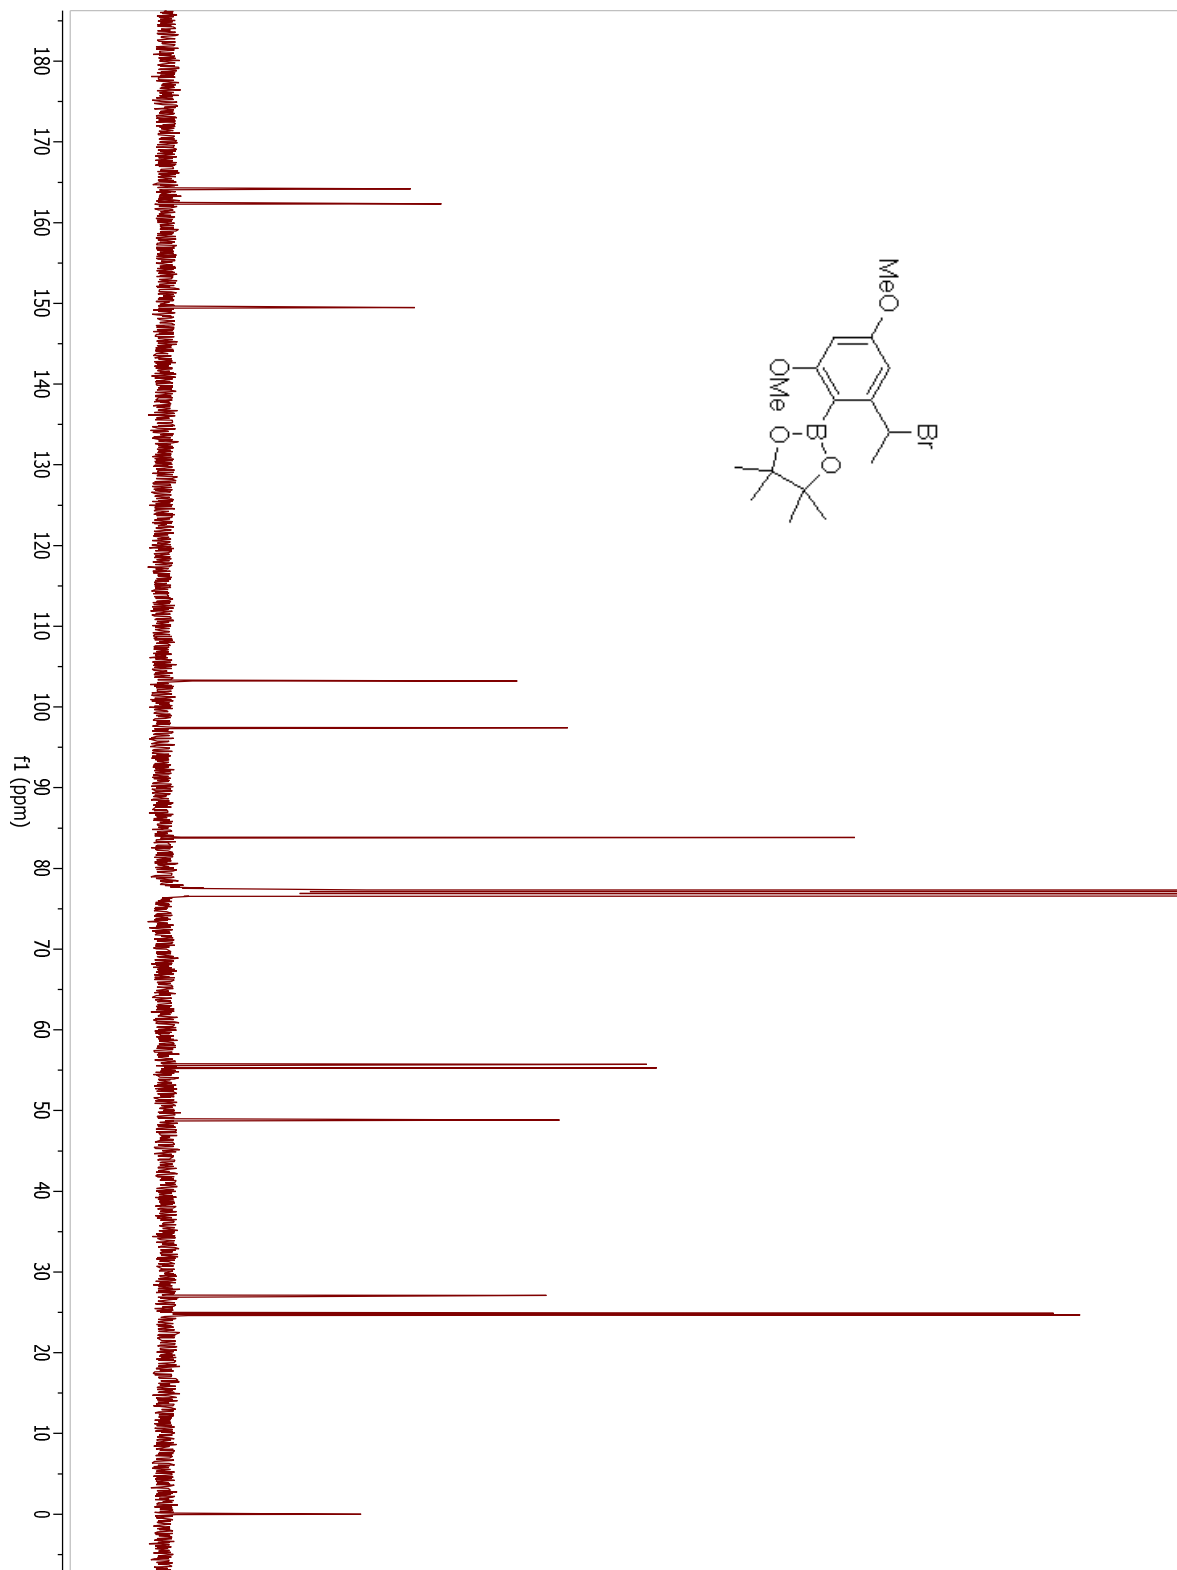

2-[1-(2-bromo-3,5-dimethoxyphenyl)ethyl]-4,4,5,5-tetramethyl-1,3,2-dioxaborolane.

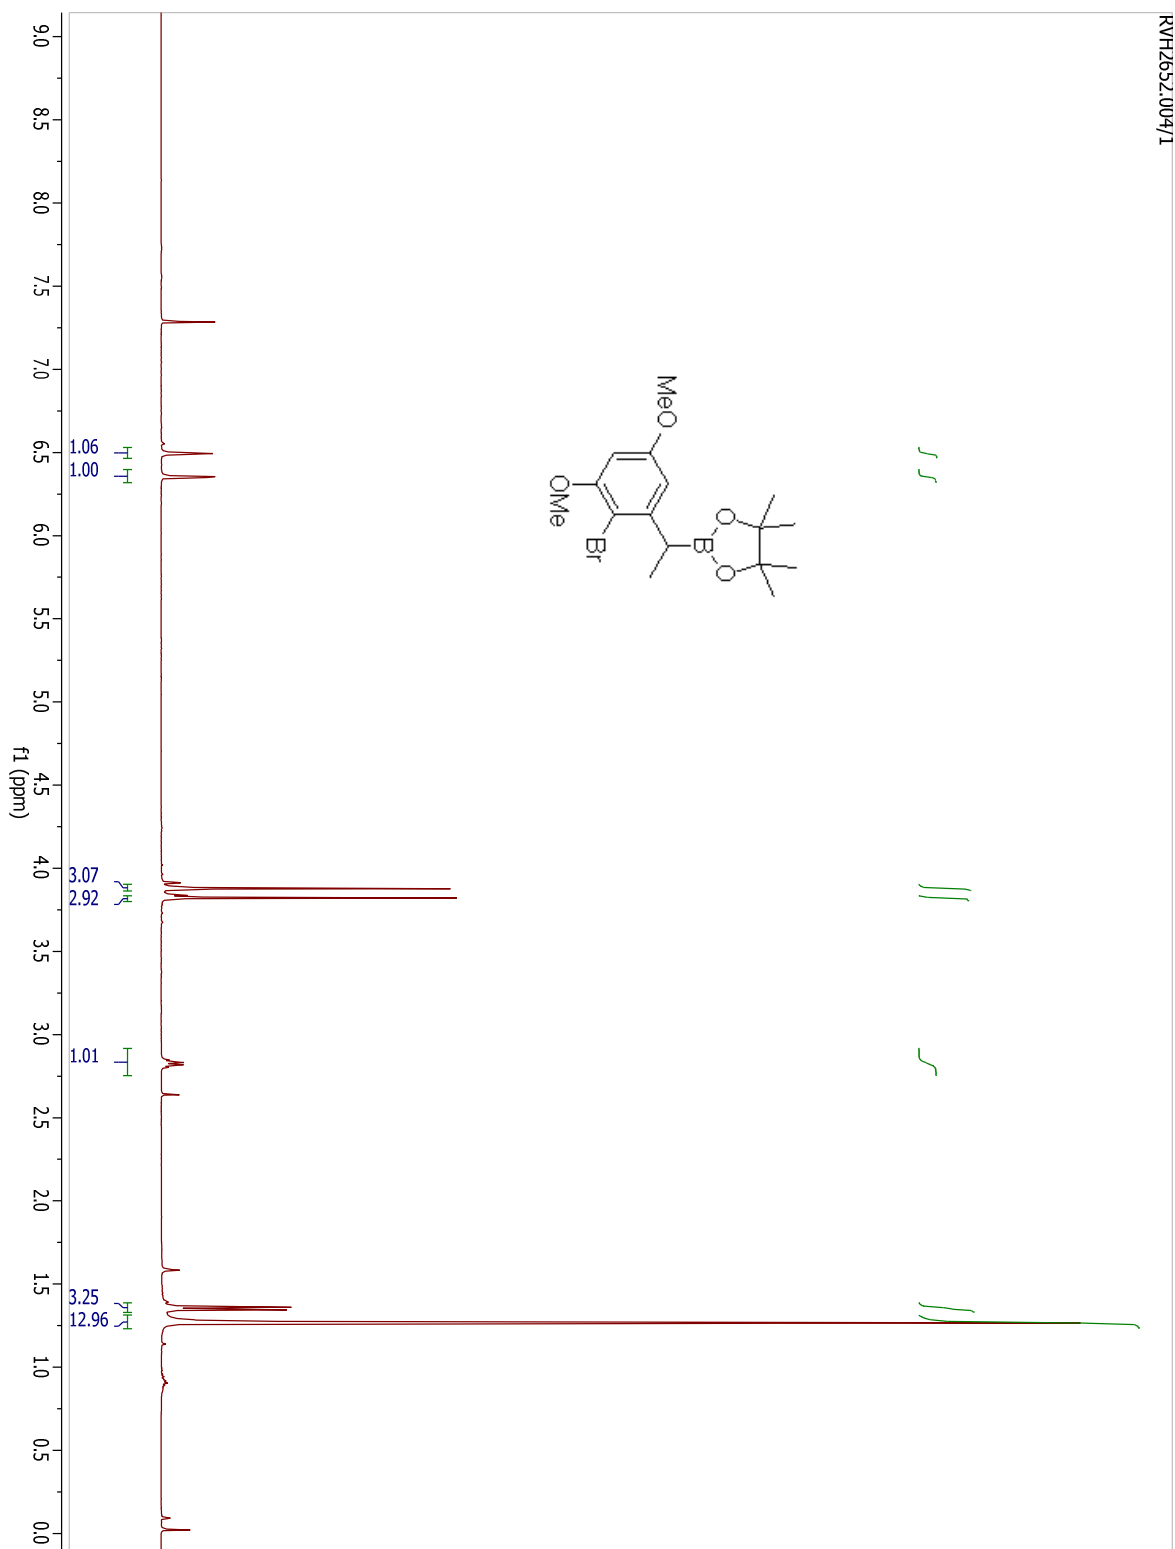

2-[1-(2-bromo-3,5-dimethoxyphenyl)ethyl]-4,4,5,5-tetramethyl-1,3,2-dioxaborolane.

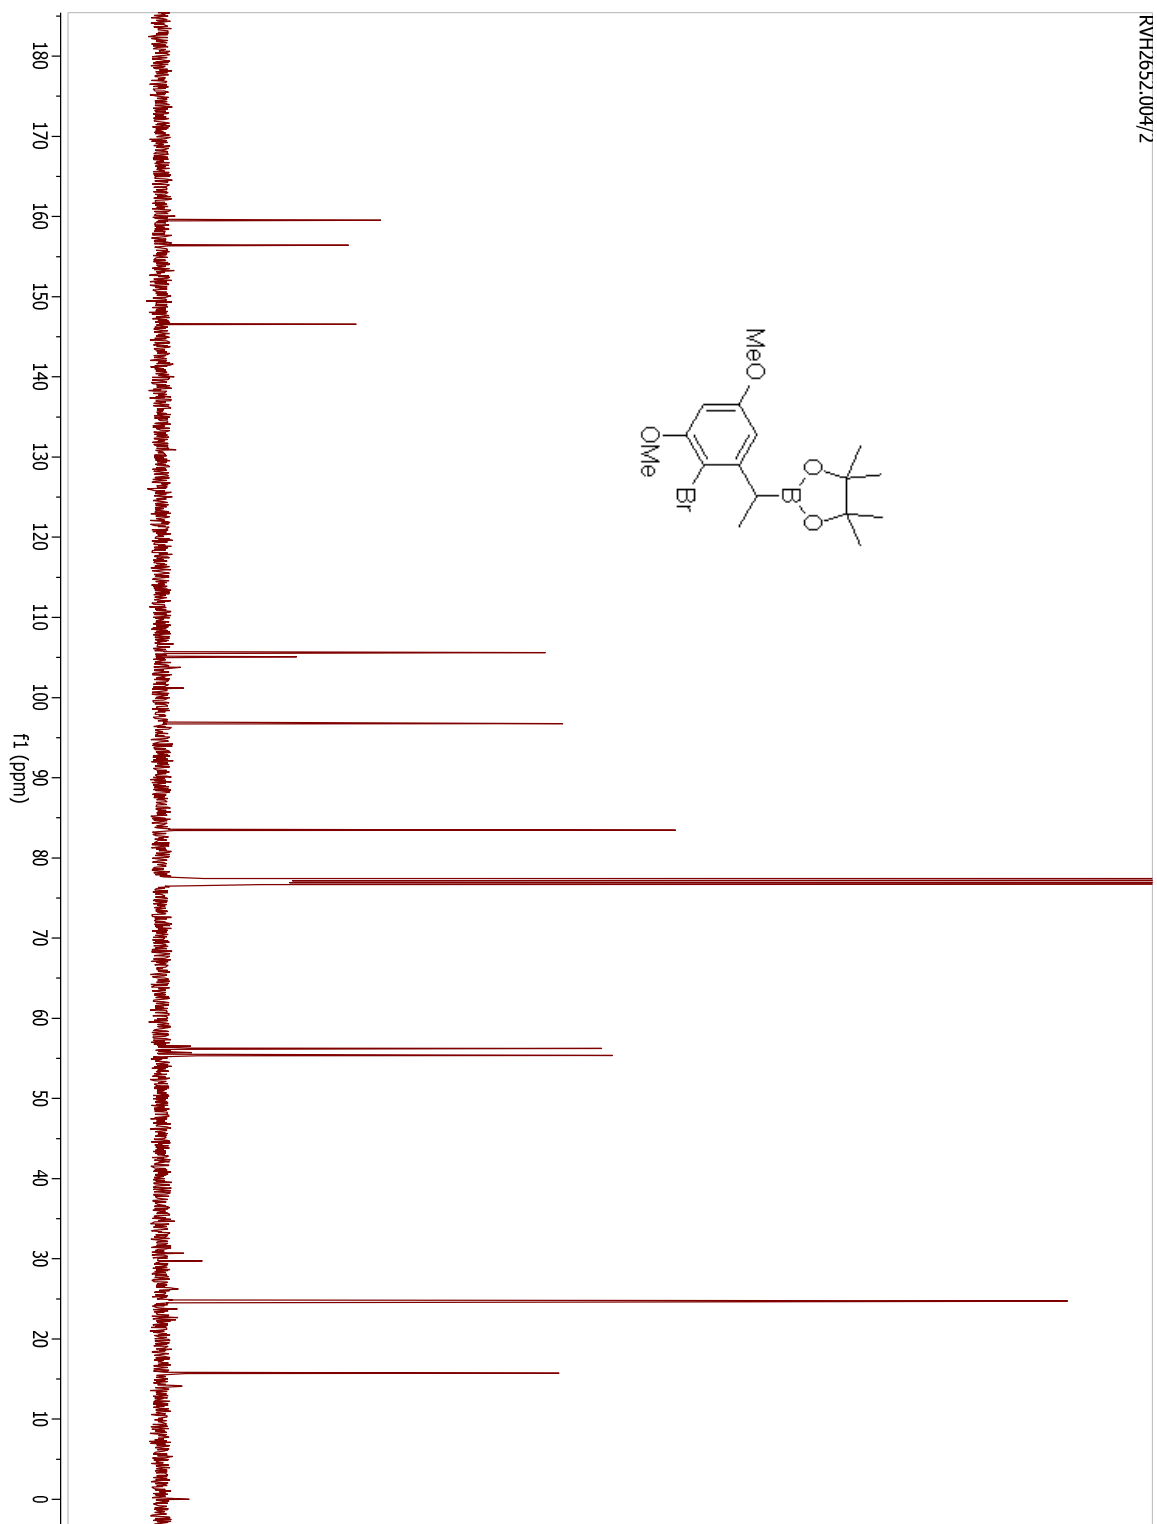

**8-[2-(4,4,5,5-tetramethyl-1,3,2-dioxaborolane)]-1-(phenylselenenyl)(2-D)-1,2,3,4-tetrahydronaphthalene**

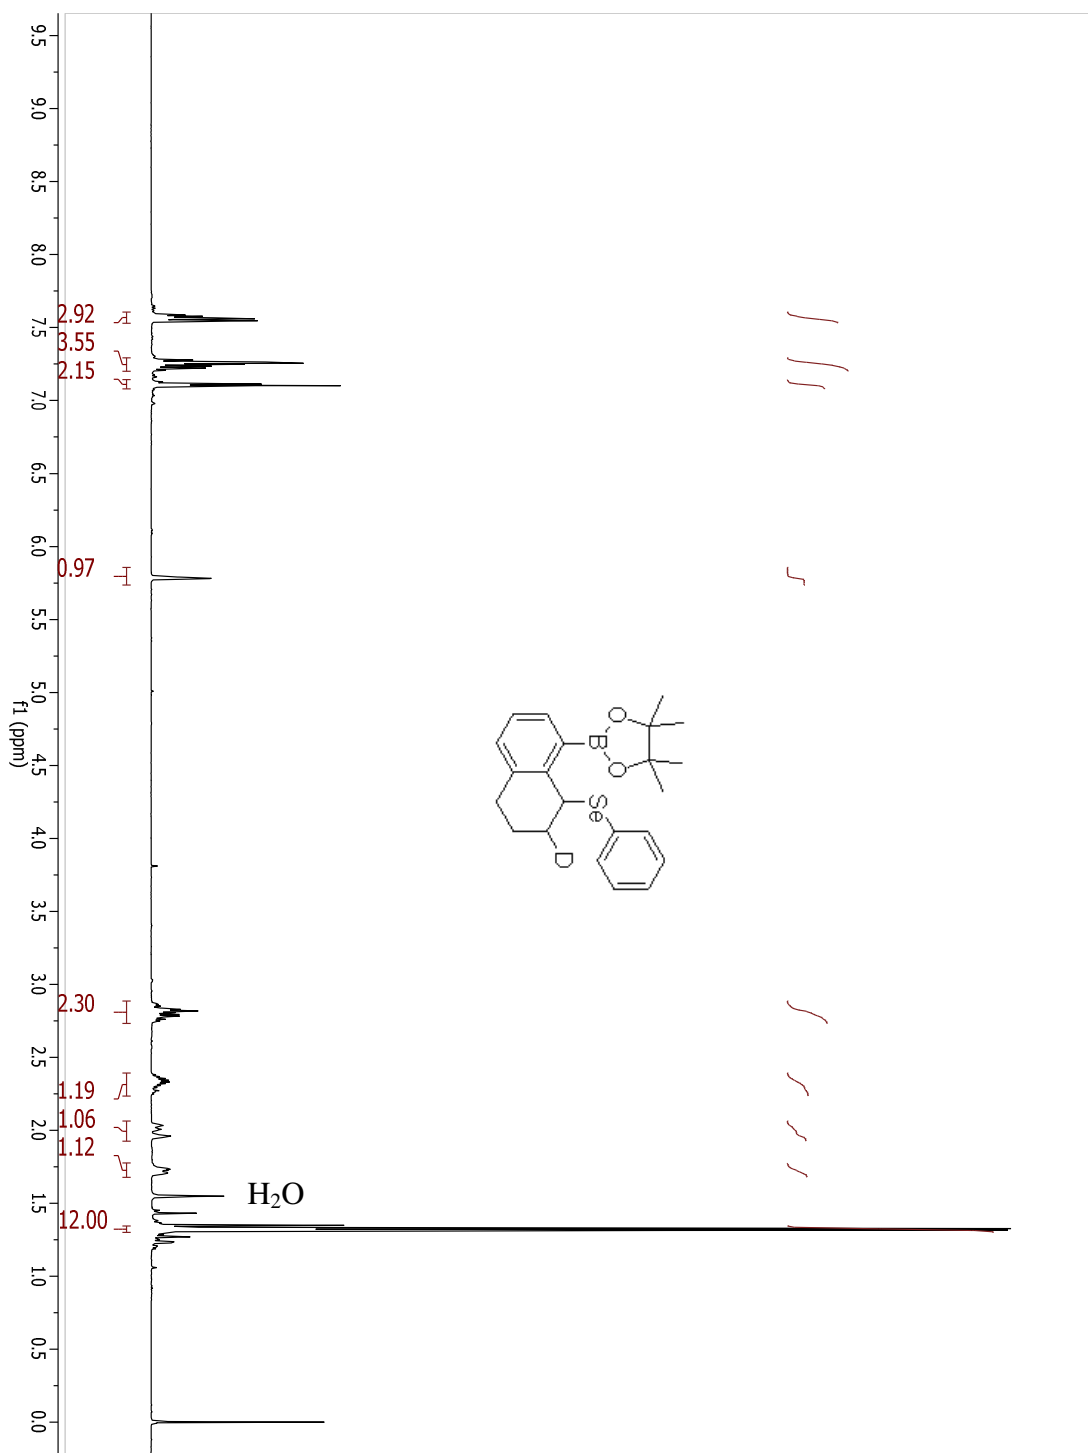

**8-[2-(4,4,5,5-tetramethyl-1,3,2-dioxaborolane)]-1-(phenylselenenyl)(2-D)-1,2,3,4-tetrahydronaphthalene**

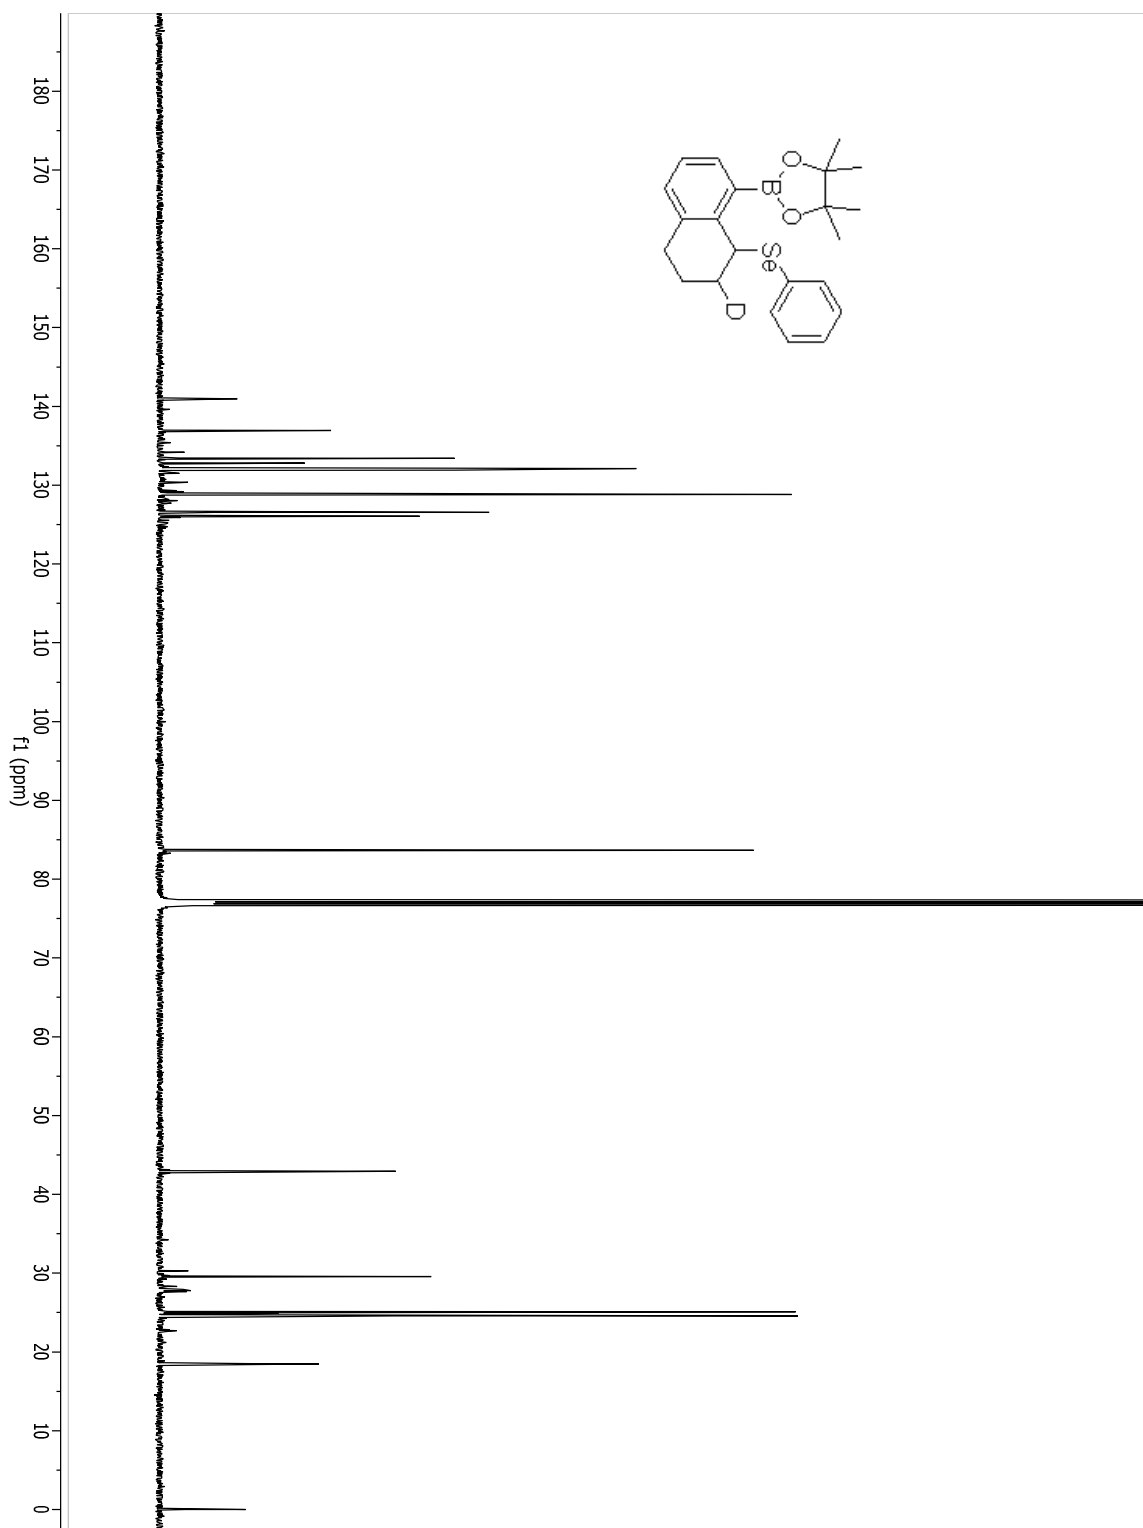

8-[2-(4,4,5,5-tetramethyl-1,3,2-dioxaborolane)]-2-deutero-3,4-dihydronaphthalene

KJ5372.002

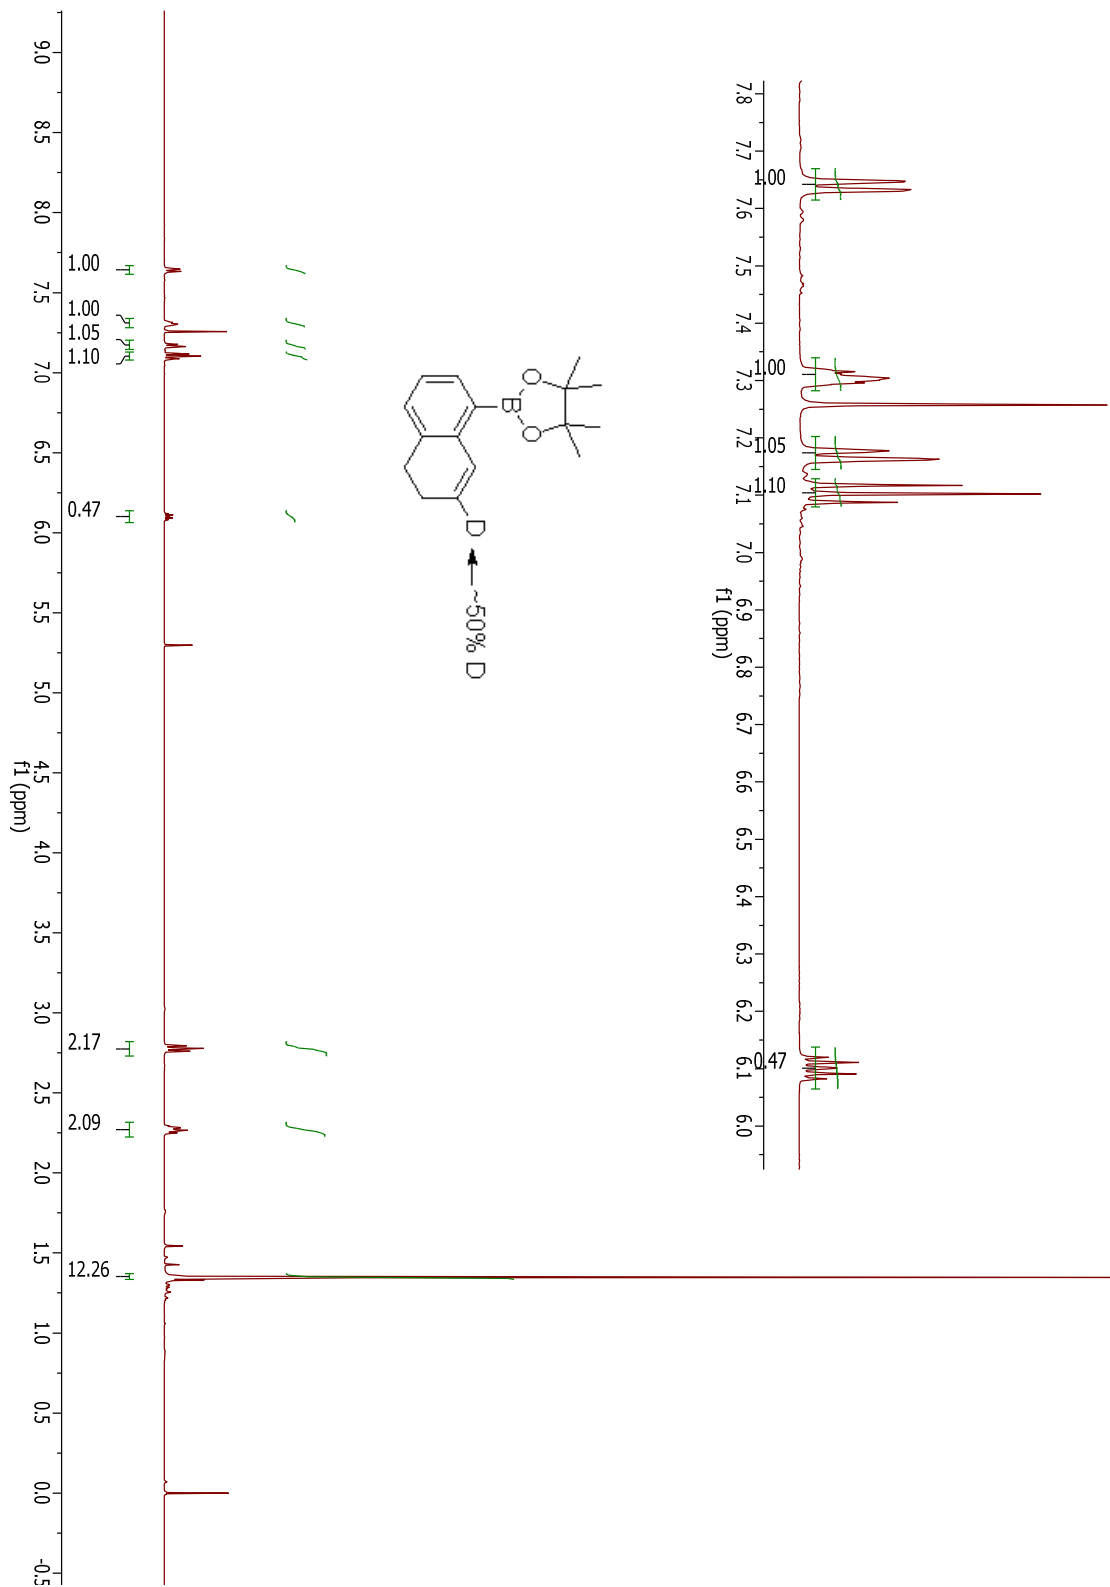

8-[2-(4,4,5,5-tetramethyl-1,3,2-dioxaborolane)]-2-deutero-3,4-dihydronaphthalene

KUS3272.002

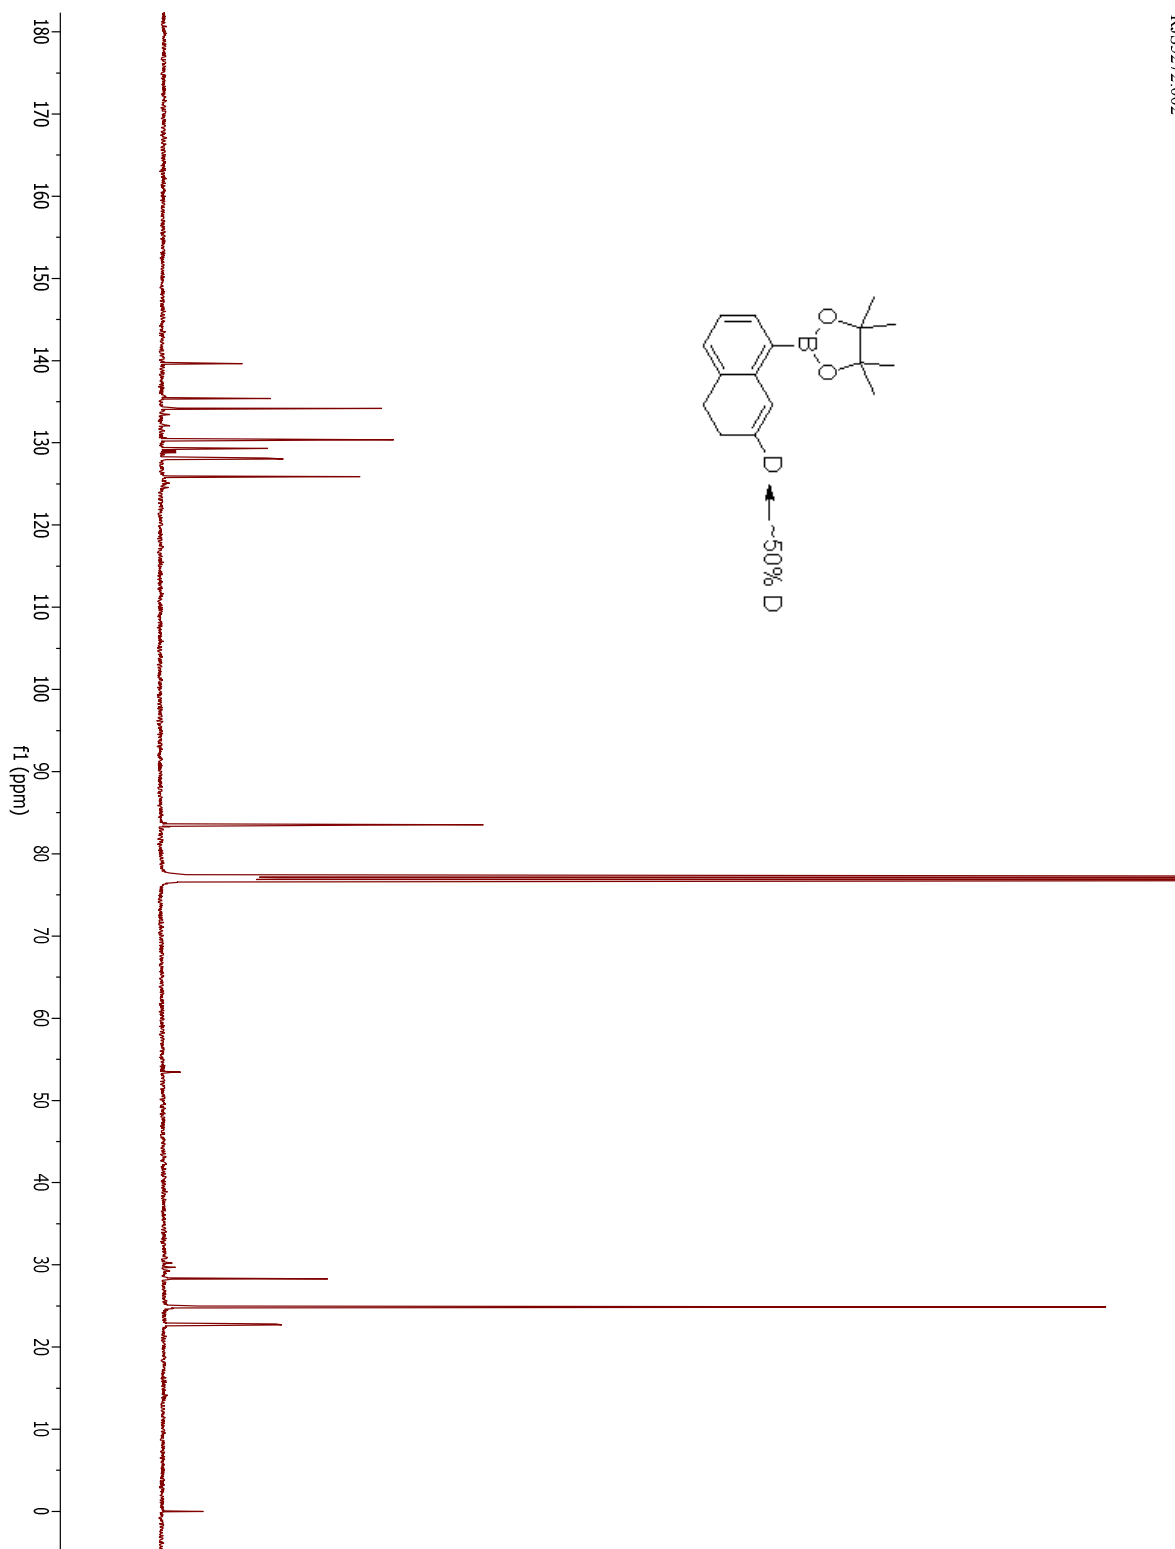

Supplement: NIHMS743509-supplement-Suppl.pdf [file NIHMS743509-supplement-Suppl.pdf]
